# Supplementary material
Source: PubMed Central journal article supplement (PMC6124434)
Supplement: jciinsight-3-99941-s081.pdf [file jciinsight-3-99941-s081.pdf]

## Supplemental Data

### Supplemental Figures

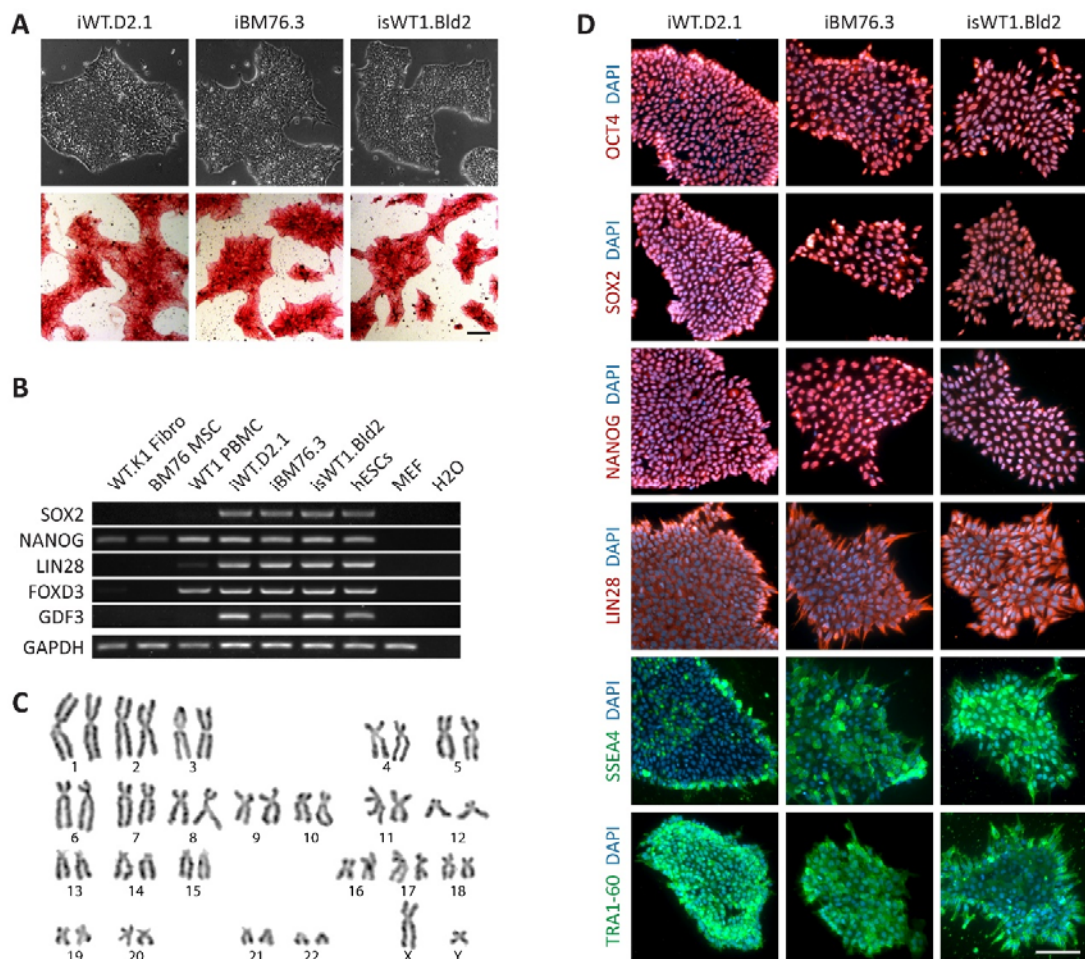

**Supplemental Figure 1: Pluripotency characterization of human iPSC lines from three healthy donors.** iWT.D2.1 and iBM76.3 were reprogrammed from dermal fibroblasts and mesenchymal stem cells, respectively, by using the STEMCCA lentivirus system; and isWT1.Bld2 was reprogrammed from peripheral blood mononuclear cells (PBMCs) by using the Sendai virus system. **(A)** All three analyzed iPSC lines display typical morphology of human pluripotent stem cells (upper panel) and are positive for alkaline phosphatase (lower panel); scale bar, 100  $\mu$ m. **(B)** Expression of endogenous pluripotency markers (*SOX2*, *NANOG*, *LIN28*, *FOXD3*, *GDF3*) in iPSC lines compared to primary cultures of dermal fibroblasts (WT.K1 Fibro), mesenchymal stem cells (BM76 MSC) and PBMCs (WT1 PBMC) was assessed by reverse transcriptase-PCR; human embryonic stem cells (hESCs) were used as positive control; mouse embryonic fibroblasts (MEF) were used as negative control. **(C)** The analyzed iPSC lines show normal karyotype (iPSC line isWT1.Bld2). **(D)** Immunofluorescence staining for pluripotency markers (OCT4, SOX2, NANOG, LIN28, SSEA4, and TRA1-60); nuclei were counter-stained with DAPI (blue); scale bar, 100  $\mu$ m.

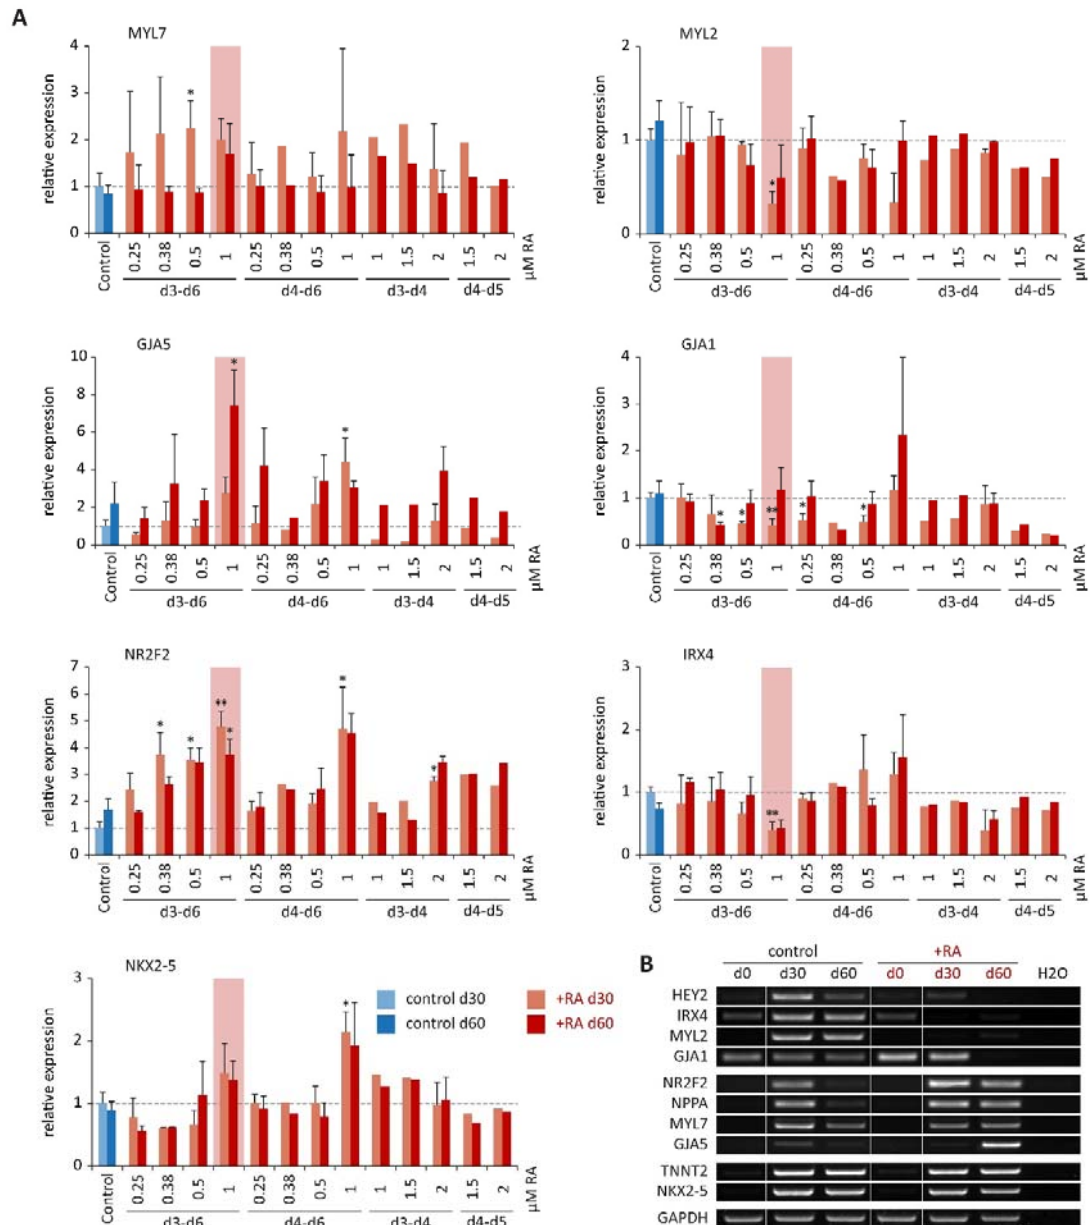

**Supplemental Figure 2: Screening of retinoic acid treatments for directed differentiation of iPSCs into atrial cardiomyocytes.** (A) Cultures during differentiation were exposed to retinoic acid (RA) at concentrations of 0.25, 0.38, 0.5 and 1  $\mu$ M between day 3-6, 0.25, 0.38, 0.5 and 1  $\mu$ M between day 4-6, 1, 1.5 and 2  $\mu$ M between day 3-4 and 1.5 and 2  $\mu$ M between day 4-5 (n=1-4 independent differentiation experiments from 3 iPSC lines, n < 3 for certain conditions due to detachment of cultures). Differentiated iPSC-derived cardiomyocytes (iPSC-CMs) were analyzed by reverse transcriptase-PCR for expression of atrial markers (*MYL7*, *GJA5*, and *NR2F2*), ventricular markers (*MYL2*, *GJA1*, and *IRX4*) and general cardiac marker *NKX2-5* at days 30 and 60 compared to untreated control. Results were quantified according to intensity and normalized to *TNNT2* expression and to controls at day 30. Treatment with 1  $\mu$ M RA at day 3-6 (highlighted in red) resulted in highest expression levels of the atrial and lowest levels of the ventricular markers. Data are presented as mean  $\pm$  SEM; \*\* $P$  < 0.01, \* $P$  < 0.05, by nonparametric Mann-Whitney U test. (B) Representative images of reverse transcriptase-PCR analysis of ventricular (*HEY2*, *IRX4*, *MYL2*, *GJA1*), atrial (*NR2F2*, *NPPA*, *MYL7*, *GJA5*) and general cardiac markers (*TNNT2*, *NKX2-5*) at day 30 and day 60 in 1  $\mu$ M RA-treated cultures and controls (iPSC line WT.D2.1). d0, undifferentiated iPSCs. Lanes were run on the same gel but were noncontiguous.

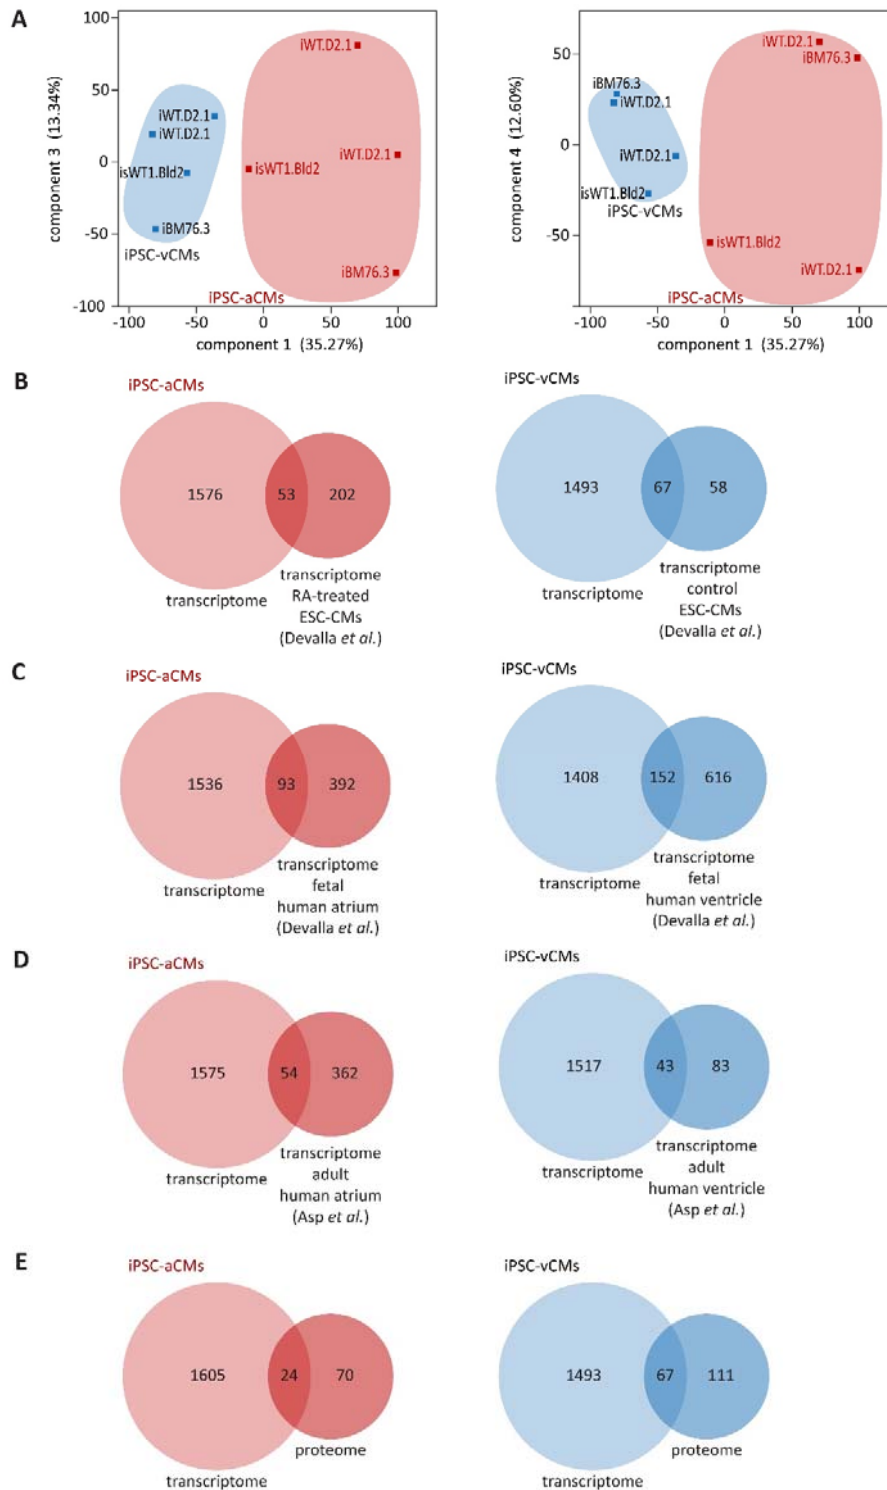

**Supplemental Figure 3: Comparison of transcriptomic analysis of iPSC-derived atrial or ventricular cardiomyocytes.** (A) Principal component analysis of component 1 versus component 3 and component 1 versus component 4 of the global gene expression data of iPSC-derived atrial and ventricular cardiomyocytes (iPSC-aCMs, iPSC-vCMs) at day 90 ( $n = 4$  iPSC-vCM and  $n = 4$  iPSC-aCM independent differentiation experiments from 3 iPSC lines). (B) Comparison of significantly higher expressed genes in iPSC-aCMs or iPSC-vCMs from the RNA-seq data ( $\log_2\text{-fold} > 0.5$ ;  $P < 0.05$ ) with published transcriptomic data for RA-treated and control human ESC-derived CMs (1). (C, D) Comparison of significantly higher expressed genes in iPSC-aCMs or iPSC-vCMs from the RNA-seq data ( $\log_2\text{-fold} > 0.5$ ;  $P < 0.05$ ) with published transcriptomic data for human fetal (C) and adult heart tissues (D) (1, 2). (E) Comparison of significantly higher expressed genes in the RNA-seq data (at day 90) with proteins in the SILAC data (at day 68) in iPSC-aCMs or iPSC-vCMs.

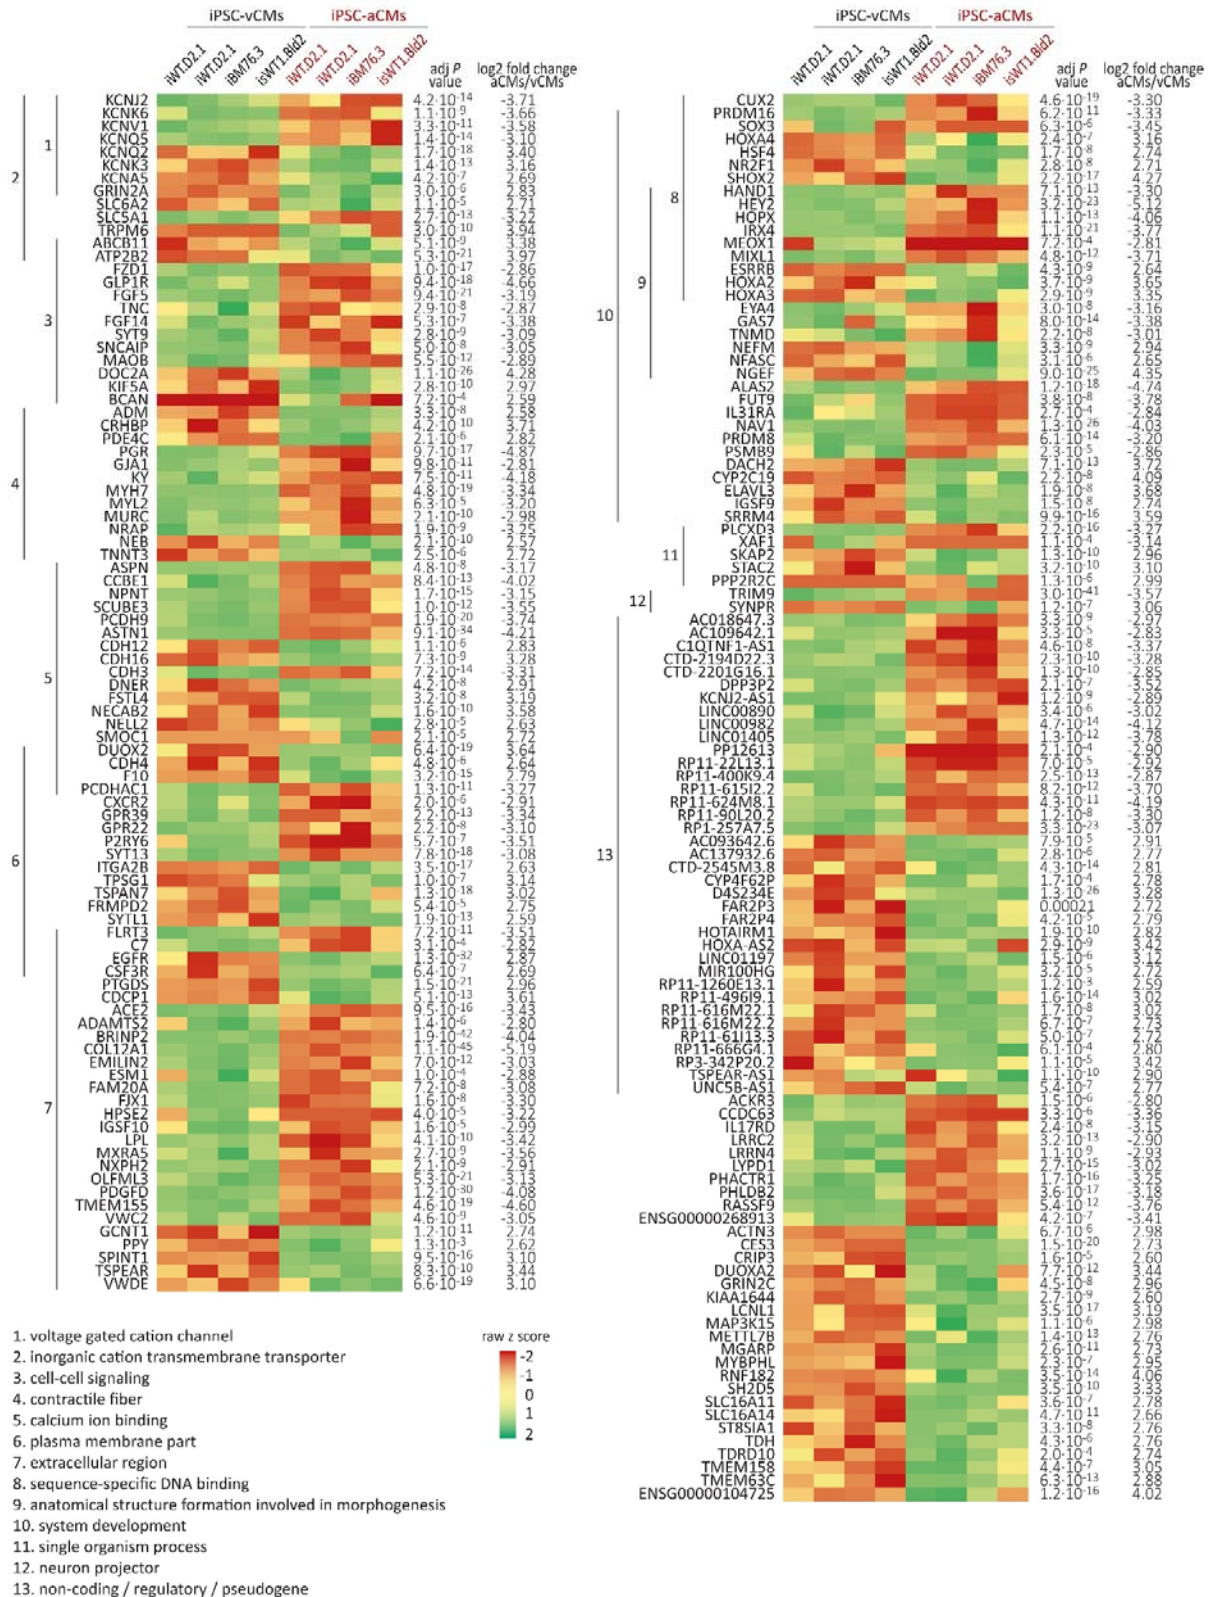

**Supplemental Figure 4: Heat map of Top200 differentially expressed transcripts in iPSC-derived atrial compared to ventricular cardiomyocytes.** The genes are clustered according to biological protein function from total RNA sequencing data of iPSC-derived atrial and ventricular cardiomyocytes (iPSC-aCMs, iPSC-vCMs) at day 90 (n = 4 iPSC-vCM and n = 4 iPSC-aCM independent differentiation experiments from 3 iPSC lines); adjusted *P*-value and log<sub>2</sub> fold change of iPSC-aCMs/iPSC-vCMs are indicated; color code according to z raw score.

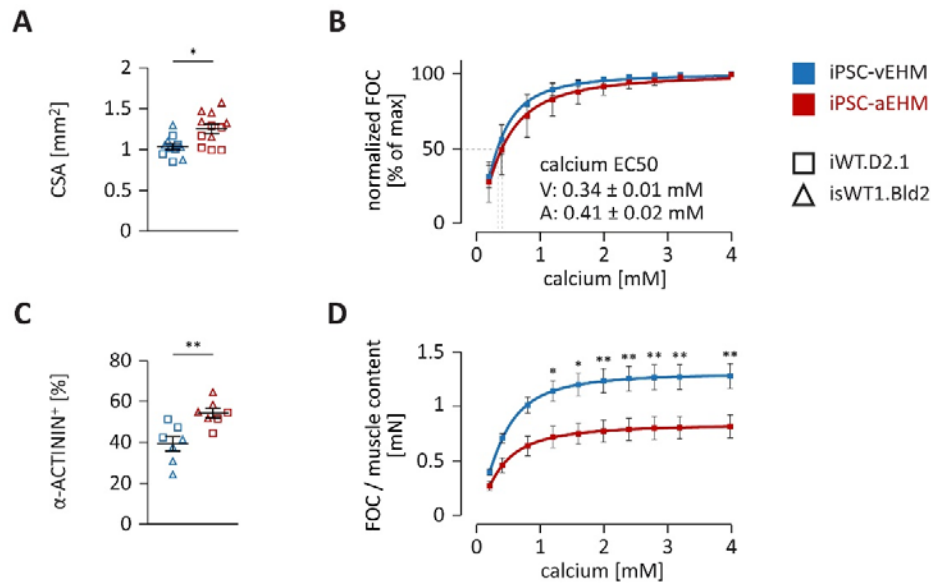

**Supplemental Figure 5: Generation and analysis of iPSC-derived atrial and ventricular engineered heart muscle.** (A) Analysis of cross-sectional area (CSA) of iPSC-derived atrial and ventricular engineered heart muscle (iPSC-aEHM and iPSC-vEHM). (B) Determination of half maximal effective concentration (EC<sub>50</sub>) for calcium of individual iPSC-EHM by analysis of normalized force of contraction (FOC) in response to increasing extracellular calcium from 0.2-4 mM. (C) Analysis of iPSC-CM content after enzymatic dispersion of iPSC-EHM, measured by flow cytometry for α-actinin<sup>+</sup> cells. (D) Analysis of FOC in relation to muscle content of iPSC-EHM in response to increasing extracellular calcium from 0.2-4 mM. n = 11 iPSC-vEHM and n = 12 iPSC-aEHM from iPSC lines iWT.D2.1 and isWT1.Bld2 were analyzed. Data are presented as mean ± SEM; \*\**P* < 0.01, \**P* < 0.05, by nonparametric Mann-Whitney U test (A, C) or by two-way ANOVA with Sidak corrections (B, D).

### Supplemental Videos

**Supplemental Video 1:** Representative video of an iPSC-derived ventricular engineered heart muscle (iPSC line iWT.D2.1).

**Supplemental Video 2:** Representative video of an iPSC-derived atrial engineered heart muscle (iPSC line iWT.D2.1).

## Supplemental Tables

**Supplemental Table 1: Differentially expressed genes in iPSC-derived atrial (aCMs) and ventricular cardiomyocytes (vCMs) with log<sub>2</sub> fold changes (aCMs/vCMs) < -1 (A) or > 1 (B). n = 4 iPSC-vCM and n = 4 iPSC-aCM independent differentiation experiments at day 90 from 3 iPSC lines.**

(A) List of 865 transcripts with significantly lower expression in iPSC-aCMs compared to iPSC-vCMs.

| Ensembl ID      | Gene name     | Base mean | log <sub>2</sub> (aCMs/vCMs) | adj P value | Ensembl ID      | Gene name     | Base mean | log <sub>2</sub> (aCMs/vCMs) | adj P value |
|-----------------|---------------|-----------|------------------------------|-------------|-----------------|---------------|-----------|------------------------------|-------------|
| ENSG00000111799 | COL12A1       | 2251.3    | -5.19                        | 1.1E-45     | ENSG00000112319 | EYA4          | 131.9     | -3.16                        | 3.0E-08     |
| ENSG00000135547 | HEY2          | 1060.2    | -5.12                        | 3.2E-23     | ENSG00000144730 | IL17RD        | 1629.9    | -3.15                        | 2.4E-08     |
| ENSG00000082175 | PGR           | 130.2     | -4.87                        | 9.7E-17     | ENSG00000168743 | NPNT          | 5746.1    | -3.15                        | 1.7E-15     |
| ENSG00000158578 | ALAS2         | 594.3     | -4.74                        | 1.2E-18     | ENSG00000132530 | XAF1          | 22.1      | -3.14                        | 1.1E-04     |
| ENSG00000112164 | GLP1R         | 87.7      | -4.66                        | 9.4E-18     | ENSG00000116774 | OLFML3        | 307.7     | -3.13                        | 5.3E-21     |
| ENSG00000164112 | TMEM155       | 131.2     | -4.60                        | 4.6E-19     | ENSG00000172209 | GPR22         | 349.2     | -3.10                        | 2.2E-08     |
| ENSG00000152092 | ASTN1         | 634.6     | -4.21                        | 9.1E-34     | ENSG00000185760 | KCNQ5         | 370.4     | -3.10                        | 1.4E-14     |
| ENSG00000237742 | RP11-624M8.1  | 25.1      | -4.19                        | 4.3E-11     | ENSG00000170743 | SYT9          | 191.0     | -3.09                        | 2.8E-09     |
| ENSG00000174611 | KY            | 37.4      | -4.18                        | 7.5E-11     | ENSG00000108950 | FAM20A        | 107.6     | -3.08                        | 7.2E-08     |
| ENSG00000177133 | LINC00982     | 1055.6    | -4.12                        | 4.7E-14     | ENSG00000019505 | SYT13         | 978.1     | -3.08                        | 7.8E-18     |
| ENSG00000170962 | PDGFD         | 1590.6    | -4.08                        | 1.2E-30     | ENSG00000272379 | RP1-257A7.5   | 181.0     | -3.07                        | 3.3E-23     |
| ENSG00000171476 | HOPX          | 711.7     | -4.06                        | 1.1E-13     | ENSG00000064692 | SNCAIP        | 333.7     | -3.05                        | 5.0E-08     |
| ENSG00000198797 | BRINP2        | 159.5     | -4.04                        | 1.9E-42     | ENSG00000188730 | VWC2          | 237.1     | -3.05                        | 4.6E-09     |
| ENSG00000134369 | NAV1          | 10090.6   | -4.03                        | 1.3E-26     | ENSG00000132205 | EMILIN2       | 2546.9    | -3.03                        | 7.0E-12     |
| ENSG00000183287 | CCBE1         | 240.5     | -4.02                        | 8.4E-13     | ENSG00000150551 | LYPD1         | 127.1     | -3.02                        | 2.7E-15     |
| ENSG00000185847 | LINC01405     | 200.5     | -3.78                        | 1.3E-12     | ENSG00000260802 | LINC00890     | 55.7      | -3.02                        | 3.4E-06     |
| ENSG00000172461 | FUT9          | 21.8      | -3.78                        | 3.8E-08     | ENSG00000000005 | TNMD          | 438.9     | -3.01                        | 2.2E-08     |
| ENSG00000113430 | IRX4          | 1045.1    | -3.77                        | 1.1E-21     | ENSG00000152580 | IGSF10        | 42.5      | -2.99                        | 1.6E-05     |
| ENSG00000198774 | RASSF9        | 42.4      | -3.76                        | 5.4E-12     | ENSG00000170681 | MURC          | 944.5     | -2.98                        | 2.1E-10     |
| ENSG00000184226 | PCDH9         | 95.0      | -3.74                        | 1.9E-20     | ENSG00000227544 | AC018647.3    | 119.4     | -2.97                        | 3.3E-09     |
| ENSG00000123700 | KCNJ2         | 85.2      | -3.71                        | 4.2E-14     | ENSG00000125872 | LRRN4         | 269.7     | -2.93                        | 1.1E-09     |
| ENSG00000185155 | MIXL1         | 67.6      | -3.71                        | 4.8E-12     | ENSG00000272235 | RP11-22L13.1  | 11.4      | -2.92                        | 7.0E-05     |
| ENSG00000260577 | RP11-615I2.2  | 59.4      | -3.70                        | 8.2E-12     | ENSG00000144227 | NXPH2         | 65.4      | -2.91                        | 2.1E-09     |
| ENSG00000099337 | KCNK6         | 408.5     | -3.66                        | 1.1E-09     | ENSG00000180871 | CXCR2         | 29.1      | -2.91                        | 2.0E-06     |
| ENSG00000164794 | KCNV1         | 49.5      | -3.58                        | 3.3E-11     | ENSG00000163827 | LRRC2         | 296.7     | -2.90                        | 3.2E-13     |
| ENSG00000100505 | TRIM9         | 426.1     | -3.57                        | 3.0E-41     | ENSG00000226757 | PP12613       | 9.3       | -2.90                        | 2.1E-04     |
| ENSG00000101825 | MXRA5         | 162.2     | -3.56                        | 2.7E-09     | ENSG00000069535 | MAOB          | 246.5     | -2.89                        | 5.5E-12     |
| ENSG00000146197 | SCUBE3        | 3179.9    | -3.55                        | 1.0E-12     | ENSG00000267365 | KCNJ2-AS1     | 42.6      | -2.89                        | 1.2E-09     |
| ENSG00000221844 | DPP3P2        | 20.2      | -3.52                        | 2.1E-07     | ENSG00000164283 | ESM1          | 21.2      | -2.88                        | 1.0E-04     |
| ENSG00000125848 | FLRT3         | 153.2     | -3.51                        | 7.2E-11     | ENSG00000237807 | RP11-400K9.4  | 69.3      | -2.87                        | 2.5E-13     |
| ENSG00000171631 | P2RY6         | 37.6      | -3.51                        | 5.7E-07     | ENSG00000041982 | TNC           | 252.6     | -2.87                        | 2.9E-08     |
| ENSG00000134595 | SOX3          | 37.8      | -3.45                        | 6.3E-06     | ENSG00000240065 | PSMB9         | 67.8      | -2.86                        | 2.3E-05     |
| ENSG00000130234 | ACE2          | 144.3     | -3.43                        | 9.5E-16     | ENSG00000157240 | FZD1          | 8716.4    | -2.86                        | 1.0E-17     |
| ENSG00000175445 | LPL           | 985.2     | -3.42                        | 4.1E-10     | ENSG00000258444 | CTD-2201G16.1 | 56.5      | -2.85                        | 1.3E-10     |
| ENSG00000268913 |               | 69.2      | -3.41                        | 4.2E-07     | ENSG00000164509 | IL31RA        | 11.5      | -2.84                        | 2.7E-04     |
| ENSG00000007237 | GAS7          | 546.9     | -3.38                        | 8.0E-14     | ENSG00000235997 | AC109642.1    | 71.6      | -2.83                        | 3.3E-05     |
| ENSG00000102466 | FGF14         | 45.1      | -3.38                        | 5.3E-07     | ENSG00000112936 | C7            | 1808.8    | -2.82                        | 3.1E-04     |
| ENSG00000265096 | C1QTNF1-AS1   | 27.3      | -3.37                        | 4.6E-08     | ENSG00000152661 | GJA1          | 2247.2    | -2.81                        | 9.8E-11     |
| ENSG00000173093 | CCDC63        | 12.8      | -3.36                        | 3.3E-06     | ENSG00000005102 | MEOX1         | 8.4       | -2.81                        | 7.2E-04     |
| ENSG00000183840 | GPR39         | 108.0     | -3.34                        | 2.2E-13     | ENSG00000144476 | ACKR3         | 219.8     | -2.80                        | 1.5E-06     |
| ENSG00000092054 | MYH7          | 172994.6  | -3.34                        | 4.8E-19     | ENSG00000087116 | ADAMTS2       | 123.8     | -2.80                        | 1.4E-06     |
| ENSG00000142611 | PRDM16        | 969.7     | -3.33                        | 6.2E-11     | ENSG00000180287 | PLD5          | 23.0      | -2.77                        | 7.0E-07     |
| ENSG00000062038 | CDH3          | 838.2     | -3.31                        | 7.2E-14     | ENSG00000204291 | COL15A1       | 460.2     | -2.75                        | 3.5E-06     |
| ENSG00000235121 | RP11-90L20.2  | 31.8      | -3.30                        | 1.2E-08     | ENSG00000223923 | AC010136.2    | 16.1      | -2.75                        | 4.1E-05     |
| ENSG00000113196 | HAND1         | 275.4     | -3.30                        | 7.1E-13     | ENSG00000182747 | SLC35D3       | 128.2     | -2.74                        | 3.4E-06     |
| ENSG00000179431 | FJX1          | 146.4     | -3.30                        | 1.6E-08     | ENSG00000260918 | RP11-731J8.2  | 34.1      | -2.72                        | 1.2E-05     |
| ENSG00000111249 | CUX2          | 317.4     | -3.30                        | 4.6E-19     | ENSG00000213626 | LBH           | 4908.1    | -2.72                        | 7.3E-08     |
| ENSG00000249116 | CTD-2194D22.3 | 62.5      | -3.28                        | 2.3E-10     | ENSG00000000971 | CFH           | 100.3     | -2.70                        | 5.8E-05     |
| ENSG00000182836 | PLCXD3        | 4231.6    | -3.27                        | 2.2E-16     | ENSG00000132953 | XPO4          | 5229.7    | -2.69                        | 9.7E-14     |
| ENSG00000248383 | PCDHAC1       | 78.6      | -3.27                        | 1.3E-11     | ENSG00000132031 | MATN3         | 56.1      | -2.68                        | 1.4E-06     |
| ENSG00000197893 | NRAP          | 887.7     | -3.25                        | 1.9E-09     | ENSG00000156427 | FGF18         | 640.3     | -2.67                        | 7.1E-11     |
| ENSG00000112137 | PHACTR1       | 867.3     | -3.25                        | 1.7E-16     | ENSG00000132464 | ENAM          | 14.1      | -2.67                        | 6.6E-05     |
| ENSG00000172987 | HPSE2         | 15.1      | -3.22                        | 4.0E-05     | ENSG00000135298 | ADGRB3        | 55.0      | -2.67                        | 2.8E-06     |
| ENSG00000100170 | SLC5A1        | 687.6     | -3.22                        | 2.7E-13     | ENSG00000162618 | ADGRL4        | 8.0       | -2.66                        | 7.2E-04     |
| ENSG00000111245 | MYL2          | 18694.1   | -3.20                        | 6.3E-05     | ENSG00000154258 | ABCA9         | 15.3      | -2.66                        | 3.8E-04     |
| ENSG00000152784 | PRDM8         | 174.2     | -3.20                        | 6.1E-14     | ENSG00000106829 | TLE4          | 201.9     | -2.65                        | 8.9E-16     |
| ENSG00000138675 | FGF5          | 419.8     | -3.19                        | 9.4E-21     | ENSG00000109205 | ODAM          | 15.0      | -2.65                        | 1.1E-03     |
| ENSG00000144824 | PHLDB2        | 2990.0    | -3.18                        | 3.6E-17     | ENSG00000101098 | RIMS4         | 160.3     | -2.62                        | 1.4E-06     |
| ENSG00000106819 | ASPN          | 557.1     | -3.17                        | 4.8E-08     | ENSG00000137801 | THBS1         | 2455.8    | -2.62                        | 7.1E-06     |

|                  |               |        |       |         |                 |               |        |       |         |
|------------------|---------------|--------|-------|---------|-----------------|---------------|--------|-------|---------|
| ENSG00000127241  | MASP1         | 1738.0 | -2.61 | 6.2E-07 | ENSG00000169855 | ROBO1         | 1679.1 | -2.26 | 2.3E-06 |
| ENSG00000154856  | APCDD1        | 732.6  | -2.61 | 3.1E-09 | ENSG00000076706 | MCAM          | 1971.5 | -2.26 | 8.5E-10 |
| ENSG00000136859  | ANGPTL2       | 196.6  | -2.60 | 1.2E-04 | ENSG00000145423 | SFRP2         | 369.5  | -2.25 | 5.6E-03 |
| ENSG00000185774  | KCNIP4        | 160.0  | -2.59 | 3.8E-12 | ENSG00000162722 | TRIM58        | 84.6   | -2.25 | 3.3E-09 |
| ENSG00000182463  | TSHZ2         | 375.1  | -2.59 | 8.6E-10 | ENSG00000163406 | SLC15A2       | 254.5  | -2.24 | 2.8E-10 |
| ENSG00000184937  | WT1           | 361.9  | -2.59 | 4.8E-06 | ENSG00000123610 | TNFAIP6       | 9.0    | -2.24 | 5.4E-03 |
| ENSG00000261265  | CTD-2515H24.4 | 11.8   | -2.58 | 9.7E-04 | ENSG00000135842 | FAM129A       | 2592.6 | -2.24 | 8.6E-07 |
| ENSG00000016402  | IL20RA        | 74.0   | -2.57 | 5.8E-05 | ENSG00000182533 | CAV3          | 166.2  | -2.24 | 4.1E-06 |
| ENSG000000165186 | PTCHD1        | 56.8   | -2.56 | 1.1E-05 | ENSG00000168785 | TSPAN5        | 1387.8 | -2.23 | 6.1E-20 |
| ENSG00000138411  | HECW2         | 602.5  | -2.56 | 4.2E-18 | ENSG00000164761 | TNFRSF11B     | 145.0  | -2.23 | 1.7E-03 |
| ENSG00000079308  | TNS1          | 5960.6 | -2.55 | 2.2E-10 | ENSG00000205413 | SAMD9         | 20.4   | -2.23 | 9.3E-03 |
| ENSG00000236333  | TRHDE-AS1     | 9.4    | -2.55 | 1.4E-03 | ENSG00000107738 | C1orf54       | 111.3  | -2.23 | 4.9E-08 |
| ENSG00000114279  | FGF12         | 2062.0 | -2.54 | 2.1E-07 | ENSG00000230928 | RP11-34A14.3  | 11.0   | -2.23 | 6.8E-03 |
| ENSG00000128849  | CGNL1         | 5307.8 | -2.54 | 1.1E-03 | ENSG00000039560 | RAI14         | 613.8  | -2.22 | 1.8E-06 |
| ENSG00000177459  | ERICH5        | 81.5   | -2.53 | 2.6E-06 | ENSG00000110693 | SOX6          | 173.3  | -2.21 | 3.5E-06 |
| ENSG00000203706  | SERTAD4-AS1   | 35.3   | -2.53 | 7.7E-05 | ENSG00000182752 | PAPPA         | 102.5  | -2.21 | 4.2E-04 |
| ENSG00000108576  | SLC6A4        | 72.4   | -2.53 | 9.4E-06 | ENSG00000106571 | GLI3          | 215.7  | -2.20 | 4.9E-04 |
| ENSG00000164035  | EMCN          | 8.5    | -2.53 | 2.3E-03 | ENSG00000243232 | PCDHAC2       | 467.9  | -2.20 | 1.4E-04 |
| ENSG00000138166  | DUSP5         | 1054.2 | -2.52 | 1.3E-10 | ENSG00000139329 | LUM           | 193.8  | -2.19 | 1.2E-02 |
| ENSG00000185046  | ANKS1B        | 73.2   | -2.52 | 2.3E-07 | ENSG00000241732 |               | 47.8   | -2.19 | 2.4E-03 |
| ENSG00000023171  | GRAMD1B       | 121.7  | -2.51 | 2.6E-05 | ENSG00000138829 | FBN2          | 9163.7 | -2.18 | 6.9E-11 |
| ENSG00000235904  | RBMS3-AS3     | 11.2   | -2.49 | 6.6E-04 | ENSG00000249693 | THEGL         | 10.1   | -2.18 | 5.8E-03 |
| ENSG00000143248  | RGS5          | 1709.3 | -2.49 | 3.8E-08 | ENSG00000080573 | COL5A3        | 50.4   | -2.18 | 3.2E-03 |
| ENSG00000115232  | ITGA4         | 36.0   | -2.48 | 4.4E-04 | ENSG00000152822 | GRM1          | 193.4  | -2.18 | 3.1E-05 |
| ENSG00000046653  | GPM6B         | 252.2  | -2.48 | 4.0E-17 | ENSG00000112769 | LAMA4         | 1102.0 | -2.17 | 1.9E-08 |
| ENSG00000143196  | DPT           | 8.5    | -2.47 | 3.1E-03 | ENSG00000151892 | GFRA1         | 296.3  | -2.17 | 9.3E-04 |
| ENSG00000206384  | COL6A6        | 113.2  | -2.47 | 7.1E-06 | ENSG00000167912 | RP11-25K19.1  | 36.8   | -2.17 | 4.8E-05 |
| ENSG00000169851  | PCDH7         | 2099.2 | -2.47 | 1.3E-11 | ENSG00000185070 | FLRT2         | 552.1  | -2.17 | 1.6E-04 |
| ENSG00000182771  | GRID1         | 344.5  | -2.46 | 1.4E-07 | ENSG00000164741 | DLC1          | 2554.5 | -2.16 | 6.5E-12 |
| ENSG00000249307  | LINC01088     | 49.8   | -2.45 | 3.8E-05 | ENSG00000091704 | CPA1          | 15.4   | -2.16 | 6.2E-03 |
| ENSG00000165124  | SVEP1         | 86.8   | -2.45 | 5.0E-06 | ENSG00000132854 | KANK4         | 45.2   | -2.15 | 5.6E-03 |
| ENSG00000178031  | ADAMTSL1      | 612.9  | -2.44 | 2.9E-03 | ENSG00000206579 | XKR4          | 12.6   | -2.15 | 6.6E-03 |
| ENSG00000145675  | PIK3R1        | 2223.6 | -2.43 | 2.2E-16 | ENSG00000152268 |               | 2535.9 | -2.15 | 5.4E-03 |
| ENSG00000120217  | CD274         | 160.5  | -2.43 | 2.7E-07 | ENSG00000163638 | ADAMTS9       | 1200.7 | -2.14 | 3.6E-09 |
| ENSG00000189184  | PCDH18        | 75.9   | -2.42 | 9.7E-05 | ENSG00000150938 | CRIM1         | 569.3  | -2.14 | 4.3E-04 |
| ENSG00000138685  | FGF2          | 208.6  | -2.42 | 3.9E-06 | ENSG00000111913 | FAM65B        | 325.9  | -2.14 | 5.8E-05 |
| ENSG00000120278  | PLEKHG1       | 421.9  | -2.42 | 4.7E-13 | ENSG00000038427 | VCAN          | 1785.4 | -2.14 | 5.6E-03 |
| ENSG00000125430  | HS3ST3B1      | 16.7   | -2.42 | 1.0E-03 | ENSG00000174473 | GALNTL6       | 11.7   | -2.13 | 5.0E-03 |
| ENSG00000179284  | DAND5         | 36.1   | -2.42 | 1.4E-07 | ENSG00000141441 | GAREM         | 841.6  | -2.13 | 1.8E-07 |
| ENSG00000146674  | IGFBP3        | 1935.2 | -2.41 | 2.2E-07 | ENSG00000165071 | TMEM71        | 332.8  | -2.12 | 3.9E-04 |
| ENSG00000164220  | F2RL2         | 31.2   | -2.41 | 1.5E-04 | ENSG00000150722 | PPP1R1C       | 133.8  | -2.12 | 5.8E-05 |
| ENSG00000176204  | LRRTM4        | 15.5   | -2.40 | 2.4E-03 | ENSG00000150394 | CDH8          | 154.5  | -2.12 | 6.5E-11 |
| ENSG00000074706  | IPCEF1        | 8.8    | -2.40 | 3.3E-03 | ENSG00000197993 | KEL           | 135.9  | -2.11 | 8.0E-07 |
| ENSG00000139629  | GALNT6        | 78.5   | -2.40 | 8.1E-04 | ENSG00000236751 | LINC01186     | 15.6   | -2.11 | 5.6E-03 |
| ENSG00000164128  | NPY1R         | 59.3   | -2.39 | 5.0E-08 | ENSG00000189108 | IL1RAPL2      | 9.3    | -2.11 | 9.7E-03 |
| ENSG00000139117  | CPNE8         | 61.2   | -2.39 | 5.8E-05 | ENSG00000203688 | RP11-351J23.1 | 8.4    | -2.10 | 1.3E-02 |
| ENSG00000164116  | GUCY1A3       | 2299.0 | -2.39 | 2.3E-17 | ENSG00000177508 | IRX3          | 345.0  | -2.10 | 5.9E-05 |
| ENSG00000157399  | ARSE          | 8.9    | -2.38 | 2.2E-03 | ENSG00000169860 | P2RY1         | 67.2   | -2.10 | 5.2E-03 |
| ENSG00000096968  | JAK2          | 1360.4 | -2.37 | 2.8E-14 | ENSG00000065361 | ERBB3         | 728.3  | -2.10 | 4.7E-14 |
| ENSG00000148848  | ADAM12        | 60.3   | -2.36 | 9.3E-04 | ENSG00000163661 | PTX3          | 85.4   | -2.10 | 3.5E-05 |
| ENSG00000135604  | STX11         | 134.7  | -2.35 | 2.0E-07 | ENSG00000140795 | MYLK3         | 3130.9 | -2.09 | 8.5E-10 |
| ENSG00000080224  | EPHA6         | 12.8   | -2.35 | 1.1E-03 | ENSG00000197506 | SLC28A3       | 695.8  | -2.09 | 2.3E-05 |
| ENSG00000144285  | SCN1A         | 16.3   | -2.34 | 1.9E-03 | ENSG00000173193 | PARP14        | 747.0  | -2.09 | 9.0E-03 |
| ENSG00000126709  | IF16          | 2372.7 | -2.34 | 6.0E-03 | ENSG00000111145 | ELK3          | 128.7  | -2.08 | 1.4E-04 |
| ENSG00000168672  | FAM84B        | 3451.5 | -2.34 | 3.9E-08 | ENSG00000119917 | IFIT3         | 246.4  | -2.08 | 1.9E-02 |
| ENSG00000049130  | KITLG         | 141.8  | -2.33 | 6.5E-08 | ENSG00000197555 | SIPAIL1       | 843.1  | -2.08 | 1.2E-05 |
| ENSG00000152402  | GUCY1A2       | 319.1  | -2.33 | 6.0E-08 | ENSG00000197442 | MAP3K5        | 172.5  | -2.08 | 1.4E-05 |
| ENSG00000180785  | OR51E1        | 17.3   | -2.33 | 1.2E-03 | ENSG00000179776 | CDH5          | 17.5   | -2.08 | 8.4E-03 |
| ENSG00000136630  | HLX           | 48.0   | -2.32 | 1.3E-05 | ENSG00000137077 | CCL21         | 156.4  | -2.08 | 4.2E-03 |
| ENSG00000134183  | GNAT2         | 13.8   | -2.30 | 1.2E-03 | ENSG00000174059 | CD34          | 54.2   | -2.08 | 9.4E-03 |
| ENSG00000198846  | TOX           | 216.3  | -2.30 | 1.2E-05 | ENSG00000103381 | CPPED1        | 114.8  | -2.08 | 2.6E-10 |
| ENSG00000205488  | CALML3-AS1    | 10.3   | -2.30 | 2.8E-03 | ENSG00000184374 | COLEC10       | 9.7    | -2.07 | 7.2E-03 |
| ENSG00000011638  | TMEM159       | 878.2  | -2.29 | 5.0E-07 | ENSG00000198929 | NOS1AP        | 45.1   | -2.07 | 2.7E-04 |
| ENSG00000113396  | SLC27A6       | 2190.0 | -2.28 | 2.2E-08 | ENSG00000137968 | SLC44A5       | 594.0  | -2.07 | 1.2E-08 |
| ENSG00000180611  | MB21D2        | 467.2  | -2.28 | 7.6E-13 | ENSG00000106366 | SERPINE1      | 234.4  | -2.06 | 2.4E-03 |
| ENSG00000189221  | MAOA          | 265.7  | -2.28 | 4.3E-04 | ENSG00000196136 | SERPINA3      | 11.4   | -2.06 | 1.3E-02 |
| ENSG00000172380  | GNG12         | 2094.3 | -2.27 | 5.0E-10 | ENSG00000238243 | OR2W3         | 54.1   | -2.06 | 1.3E-05 |
| ENSG00000168077  | SCARA3        | 139.3  | -2.27 | 3.3E-05 | ENSG00000154415 | PPP1R3A       | 1226.3 | -2.06 | 1.1E-06 |
| ENSG00000112782  | CLIC5         | 1313.6 | -2.27 | 8.4E-10 | ENSG00000239887 | C1orf226      | 109.3  | -2.05 | 6.6E-04 |
| ENSG00000183242  | WT1-AS        | 69.2   | -2.26 | 1.4E-04 | ENSG00000108405 | P2RX1         | 827.4  | -2.04 | 1.4E-04 |
| ENSG00000082497  | SERTAD4       | 202.5  | -2.26 | 8.0E-05 | ENSG00000126878 | AIF1L         | 792.2  | -2.04 | 6.2E-07 |
| ENSG00000101680  | LAMA1         | 34.1   | -2.26 | 2.6E-04 | ENSG00000129038 | LOXL1         | 521.6  | -2.04 | 1.7E-06 |

|                 |               |        |       |         |                  |                |         |       |         |
|-----------------|---------------|--------|-------|---------|------------------|----------------|---------|-------|---------|
| ENSG00000181195 | PENK          | 21.5   | -2.04 | 1.6E-02 | ENSG00000117600  | LPPR4          | 12.6    | -1.87 | 1.4E-02 |
| ENSG00000039537 | C6            | 12.3   | -2.03 | 7.7E-03 | ENSG00000122176  | FMOD           | 138.0   | -1.87 | 1.3E-02 |
| ENSG00000183230 | CTNNA3        | 933.6  | -2.02 | 4.7E-09 | ENSG00000156966  | B3GNT7         | 213.2   | -1.86 | 1.6E-03 |
| ENSG00000124749 | COL21A1       | 1075.0 | -2.02 | 7.8E-06 | ENSG00000124942  | AHNAK          | 12304.5 | -1.86 | 5.7E-10 |
| ENSG00000057294 | PKP2          | 5767.5 | -2.01 | 2.0E-10 | ENSG00000107742  | SPOCK2         | 1315.3  | -1.86 | 3.4E-02 |
| ENSG00000166828 | SCNN1G        | 8.0    | -2.01 | 2.1E-02 | ENSG00000008517  | IL32           | 8.6     | -1.86 | 3.6E-02 |
| ENSG00000231013 | AC013275.2    | 7.2    | -2.01 | 1.6E-02 | ENSG000002260641 | RP11-1299A16.3 | 149.2   | -1.86 | 1.3E-11 |
| ENSG00000003137 | CYP26B1       | 266.5  | -2.01 | 1.2E-03 | ENSG00000179241  | LDLRAD3        | 210.7   | -1.86 | 7.8E-04 |
| ENSG00000134323 | MYCN          | 84.4   | -2.01 | 5.5E-06 | ENSG00000162636  | FAM102B        | 651.1   | -1.86 | 4.6E-09 |
| ENSG00000170961 | HAS2          | 8.7    | -2.00 | 2.2E-02 | ENSG00000185745  | IFIT1          | 1412.8  | -1.85 | 9.2E-04 |
| ENSG00000204248 | COL11A2       | 5777.8 | -2.00 | 4.3E-05 | ENSG00000121898  | CPXM2          | 26.8    | -1.85 | 3.4E-02 |
| ENSG00000176842 | IRX5          | 78.1   | -2.00 | 5.2E-05 | ENSG00000250072  | CTC-529P8.1    | 10.1    | -1.84 | 1.5E-02 |
| ENSG00000151224 | MAT1A         | 206.1  | -2.00 | 7.5E-05 | ENSG00000187123  | LYPD6          | 72.2    | -1.84 | 1.8E-03 |
| ENSG00000165895 | ARHGAP42      | 380.8  | -2.00 | 8.3E-06 | ENSG00000186197  | EDARADD        | 18.5    | -1.84 | 2.7E-03 |
| ENSG00000082293 | COL19A1       | 110.9  | -2.00 | 3.1E-06 | ENSG00000058085  | LAMC2          | 18.8    | -1.84 | 1.3E-02 |
| ENSG00000069122 | ADGRF5        | 16.6   | -2.00 | 1.0E-02 | ENSG00000180801  | ARSJ           | 63.7    | -1.83 | 5.5E-04 |
| ENSG00000255103 |               | 201.1  | -2.00 | 1.2E-06 | ENSG00000156486  | KCNS2          | 190.5   | -1.83 | 1.9E-06 |
| ENSG00000231776 | LINC01611     | 25.1   | -1.99 | 2.4E-02 | ENSG00000003096  | KLHL13         | 613.6   | -1.83 | 6.6E-07 |
| ENSG00000074590 | NUAK1         | 740.0  | -1.99 | 4.6E-11 | ENSG00000164300  | SERINC5        | 187.4   | -1.83 | 6.3E-04 |
| ENSG00000260512 |               | 407.8  | -1.98 | 1.5E-05 | ENSG00000225706  | PTPRD-AS1      | 29.6    | -1.82 | 1.5E-03 |
| ENSG00000225485 |               | 1717.6 | -1.98 | 5.7E-18 | ENSG00000048707  | VPS13D         | 5197.1  | -1.82 | 5.4E-07 |
| ENSG00000169306 | IL1RAPL1      | 42.2   | -1.98 | 1.9E-06 | ENSG00000199550  | Y RNA          | 31.1    | -1.81 | 1.0E-04 |
| ENSG00000144642 | RBMS3         | 678.6  | -1.98 | 4.8E-08 | ENSG00000141753  | IGFBP4         | 2952.3  | -1.81 | 6.5E-04 |
| ENSG00000153976 | HS3ST3A1      | 15.6   | -1.98 | 1.5E-02 | ENSG00000140285  | FGF7           | 236.6   | -1.81 | 4.7E-06 |
| ENSG00000078401 | EDN1          | 33.4   | -1.97 | 5.1E-03 | ENSG00000137965  | IFI44          | 141.7   | -1.81 | 4.3E-02 |
| ENSG00000139289 | PHLDA1        | 356.3  | -1.97 | 2.9E-03 | ENSG00000215991  | MIR208B        | 7.0     | -1.81 | 3.5E-02 |
| ENSG00000163947 | ARHGEF3       | 531.4  | -1.97 | 3.3E-08 | ENSG00000019991  | HGF            | 18.3    | -1.81 | 2.9E-02 |
| ENSG00000188452 | CERKL         | 12.1   | -1.97 | 1.2E-02 | ENSG00000101311  | FERMT1         | 122.2   | -1.80 | 7.1E-04 |
| ENSG00000102359 | SRPX2         | 10.7   | -1.96 | 2.8E-02 | ENSG00000177409  | SAMD9L         | 14.7    | -1.80 | 4.5E-02 |
| ENSG00000244405 | ETV5          | 202.7  | -1.96 | 2.5E-03 | ENSG00000022267  | FHL1           | 4050.8  | -1.80 | 1.4E-05 |
| ENSG00000204282 | TNRC6C-AS1    | 198.5  | -1.95 | 1.4E-11 | ENSG00000113578  | FGF1           | 496.5   | -1.80 | 2.3E-07 |
| ENSG00000122861 | PLAU          | 46.6   | -1.95 | 3.3E-04 | ENSG00000146592  | CREB5          | 537.5   | -1.80 | 1.4E-06 |
| ENSG00000137752 | CASP1         | 17.6   | -1.95 | 8.6E-04 | ENSG00000188313  | PLSCR1         | 318.0   | -1.80 | 5.0E-03 |
| ENSG00000154928 | EPHB1         | 20.3   | -1.95 | 3.4E-03 | ENSG00000137959  | IFI44L         | 47.3    | -1.79 | 4.6E-02 |
| ENSG00000168309 | FAM107A       | 124.2  | -1.95 | 6.8E-03 | ENSG00000182255  | KCNA4          | 175.9   | -1.79 | 3.4E-05 |
| ENSG00000165300 | SLITRK5       | 76.5   | -1.95 | 3.8E-05 | ENSG00000166741  | NNMT           | 34.7    | -1.79 | 2.6E-02 |
| ENSG00000178996 | SNX18         | 560.9  | -1.94 | 1.5E-09 | ENSG00000108691  | CCL2           | 47.9    | -1.79 | 2.2E-02 |
| ENSG00000166546 | BEAN1         | 64.3   | -1.94 | 3.0E-05 | ENSG00000157514  | TSC22D3        | 1148.7  | -1.79 | 1.1E-03 |
| ENSG00000151702 | FLI1          | 7.5    | -1.94 | 2.9E-02 | ENSG00000100504  | PYGL           | 1215.1  | -1.79 | 2.5E-05 |
| ENSG00000128052 | KDR           | 107.4  | -1.94 | 1.1E-02 | ENSG00000133110  | POSTN          | 1157.0  | -1.78 | 5.6E-04 |
| ENSG00000138131 | LOXL4         | 631.5  | -1.94 | 2.0E-02 | ENSG00000116183  | PAPPA2         | 94.4    | -1.78 | 5.9E-04 |
| ENSG00000065320 | NTN1          | 177.6  | -1.93 | 4.8E-04 | ENSG00000143768  | LEFTY2         | 231.2   | -1.77 | 4.3E-02 |
| ENSG00000143816 | WNT9A         | 87.6   | -1.93 | 1.5E-06 | ENSG00000169122  | FAM110B        | 555.8   | -1.77 | 1.8E-04 |
| ENSG00000056998 | GYG2          | 178.3  | -1.92 | 9.4E-05 | ENSG00000130300  | PLVAP          | 9.4     | -1.77 | 3.8E-02 |
| ENSG00000179921 | GPBAR1        | 14.1   | -1.92 | 1.9E-02 | ENSG00000114529  | C3orf52        | 149.8   | -1.77 | 1.3E-02 |
| ENSG00000140968 | IRF8          | 56.1   | -1.92 | 2.5E-04 | ENSG00000180875  | GREM2          | 22.9    | -1.77 | 7.2E-03 |
| ENSG00000259146 | RP1-261D10.2  | 21.8   | -1.92 | 2.4E-03 | ENSG00000091986  | CCDC80         | 708.7   | -1.77 | 1.8E-03 |
| ENSG00000139567 | ACVRL1        | 8.5    | -1.92 | 2.4E-02 | ENSG00000185013  | NT5C1B         | 15.2    | -1.77 | 6.9E-03 |
| ENSG00000260025 | RP11-490M8.1  | 7.5    | -1.92 | 2.2E-02 | ENSG00000196628  | TCF4           | 241.3   | -1.77 | 1.8E-06 |
| ENSG00000197614 | MFAP5         | 17.3   | -1.92 | 2.5E-02 | ENSG00000228956  | SATB1-AS1      | 6.9     | -1.76 | 2.8E-02 |
| ENSG00000111846 | GCNT2         | 1113.3 | -1.91 | 7.2E-19 | ENSG00000134548  | SPX            | 239.3   | -1.76 | 1.7E-15 |
| ENSG00000235357 | RP1-159G19.1  | 8.0    | -1.91 | 1.7E-02 | ENSG00000112530  | PACRG          | 140.2   | -1.76 | 3.9E-06 |
| ENSG00000183654 | MARCH11       | 434.4  | -1.91 | 3.2E-15 | ENSG00000157654  | PALM2-AKAP2    | 36.8    | -1.76 | 4.1E-03 |
| ENSG00000138080 | EMILIN1       | 353.7  | -1.91 | 1.8E-03 | ENSG00000156103  | MMP16          | 114.4   | -1.76 | 1.6E-03 |
| ENSG00000130635 | COL5A1        | 3372.9 | -1.90 | 1.8E-02 | ENSG00000133985  | TTC9           | 113.4   | -1.76 | 2.7E-06 |
| ENSG00000151834 | GABRA2        | 65.9   | -1.90 | 6.8E-03 | ENSG00000144724  | PTPRG          | 375.4   | -1.76 | 5.1E-07 |
| ENSG00000117595 | IRF6          | 351.7  | -1.90 | 2.4E-04 | ENSG00000147234  | FRMPD3         | 31.9    | -1.75 | 4.2E-02 |
| ENSG00000164176 | EDIL3         | 595.3  | -1.90 | 1.9E-03 | ENSG00000162894  | FCMR           | 31.3    | -1.75 | 2.0E-03 |
| ENSG00000165474 | GJB2          | 21.0   | -1.90 | 2.3E-02 | ENSG00000212993  | POU5F1B        | 8.2     | -1.75 | 2.4E-02 |
| ENSG00000135919 | SERPINE2      | 857.4  | -1.90 | 3.5E-02 | ENSG00000139517  | LNX2           | 933.3   | -1.75 | 1.1E-07 |
| ENSG00000017427 | IGF1          | 31.0   | -1.89 | 1.0E-02 | ENSG00000168952  | STXBP6         | 585.4   | -1.75 | 1.3E-03 |
| ENSG00000162444 | RBP7          | 29.3   | -1.89 | 2.4E-03 | ENSG00000141524  | TMC6           | 1125.4  | -1.74 | 7.5E-11 |
| ENSG00000112541 | PDE10A        | 301.2  | -1.89 | 1.3E-03 | ENSG00000149090  | PAMR1          | 26.7    | -1.74 | 4.1E-02 |
| ENSG00000061337 | LZTS1         | 34.6   | -1.89 | 1.1E-04 | ENSG00000171517  | LPAR3          | 376.1   | -1.74 | 1.3E-11 |
| ENSG00000185477 | GPRIN3        | 1125.0 | -1.89 | 1.3E-04 | ENSG00000004799  | PKD4           | 67.5    | -1.74 | 5.1E-06 |
| ENSG00000224940 | PRRT4         | 146.4  | -1.89 | 5.8E-05 | ENSG00000170647  | TMEM133        | 138.9   | -1.74 | 2.0E-07 |
| ENSG00000235902 | RP11-626E13.1 | 180.4  | -1.88 | 2.8E-05 | ENSG00000163577  | EIF5A2         | 381.3   | -1.74 | 1.8E-07 |
| ENSG00000120594 | PLXDC2        | 49.3   | -1.88 | 3.8E-04 | ENSG00000145506  | NKD2           | 47.8    | -1.73 | 9.4E-03 |
| ENSG00000069702 | TGFBR3        | 422.9  | -1.88 | 6.4E-06 | ENSG00000072657  | TRHDE          | 12.3    | -1.73 | 4.3E-02 |
| ENSG00000178776 | C5orf46       | 17.5   | -1.87 | 1.4E-02 | ENSG00000163171  | CDC42EP3       | 3325.2  | -1.73 | 4.9E-07 |
| ENSG00000156395 | SORCS3        | 217.7  | -1.87 | 7.7E-03 | ENSG00000266208  | CTD-2267D19.3  | 30.8    | -1.73 | 1.2E-03 |
| ENSG00000110492 | MDK           | 5246.6 | -1.87 | 2.1E-14 | ENSG00000271803  | RP1-63M2.5     | 21.7    | -1.73 | 1.1E-02 |



|                 |                |         |       |         |                 |               |         |       |         |
|-----------------|----------------|---------|-------|---------|-----------------|---------------|---------|-------|---------|
| ENSG00000155130 |                | 1467.8  | -1.72 | 4.1E-05 | ENSG00000267744 | RP11-799D4.1  | 18.6    | -1.60 | 1.0E-02 |
| ENSG00000101892 | ATP1B4         | 11.1    | -1.72 | 4.1E-02 | ENSG00000134531 | EMP1          | 42.3    | -1.60 | 1.7E-03 |
| ENSG00000061918 | GUCY1B3        | 584.6   | -1.72 | 8.4E-05 | ENSG00000120885 | CLU           | 1091.2  | -1.59 | 5.8E-04 |
| ENSG00000186867 | QRFRP          | 20.3    | -1.72 | 1.9E-02 | ENSG00000115593 | SMYD1         | 20255.2 | -1.59 | 2.1E-11 |
| ENSG00000088888 | MAVS           | 1107.0  | -1.72 | 1.8E-04 | ENSG00000179083 | FAM133A       | 58.8    | -1.59 | 1.1E-04 |
| ENSG00000206052 | DOK6           | 189.0   | -1.72 | 1.1E-04 | ENSG00000170561 | IRX2          | 79.3    | -1.59 | 3.6E-03 |
| ENSG00000183814 | LIN9           | 636.7   | -1.71 | 3.6E-13 | ENSG00000167173 | C15orf39      | 928.9   | -1.59 | 2.1E-04 |
| ENSG00000259370 | RP11-1069G10.1 | 31.8    | -1.71 | 4.5E-04 | ENSG00000197415 | VEPH1         | 30.0    | -1.59 | 3.4E-02 |
| ENSG00000153993 | SEMA3D         | 97.8    | -1.71 | 9.5E-04 | ENSG00000151458 | ANKRD50       | 1291.3  | -1.58 | 1.2E-09 |
| ENSG00000120318 | ARAP3          | 265.8   | -1.71 | 2.6E-03 | ENSG00000129595 | EPB41L4A      | 293.5   | -1.58 | 2.4E-06 |
| ENSG00000093072 | CECR1          | 141.8   | -1.71 | 2.4E-03 | ENSG00000142627 | EPHA2         | 637.9   | -1.58 | 1.3E-03 |
| ENSG00000163297 | ANTXR2         | 2259.4  | -1.71 | 4.2E-11 | ENSG00000107147 | KCNT1         | 27.2    | -1.58 | 2.2E-03 |
| ENSG00000107521 | HPS1           | 1259.9  | -1.70 | 4.9E-13 | ENSG00000143320 | CRABP2        | 2681.5  | -1.57 | 7.4E-03 |
| ENSG00000115415 | STAT1          | 3177.1  | -1.70 | 3.8E-03 | ENSG00000197405 | C5AR1         | 15.8    | -1.57 | 3.6E-02 |
| ENSG00000235535 | RP11-532N4.2   | 501.6   | -1.70 | 3.0E-05 | ENSG00000125675 | GRIA3         | 255.2   | -1.57 | 4.3E-03 |
| ENSG00000138061 | CYP1B1         | 50.6    | -1.70 | 1.4E-02 | ENSG00000165379 | LRFN5         | 27.0    | -1.57 | 1.4E-02 |
| ENSG00000177189 | RPS6KA3        | 898.6   | -1.70 | 1.8E-05 | ENSG00000239445 | ST3GAL6-AS1   | 34.6    | -1.57 | 2.7E-03 |
| ENSG00000260244 | RP11-588K22.2  | 713.5   | -1.70 | 4.1E-12 | ENSG00000185518 | SV2B          | 59.6    | -1.56 | 1.5E-02 |
| ENSG00000010319 | SEMA3G         | 265.6   | -1.70 | 1.0E-04 | ENSG00000102362 | SYTL4         | 37.6    | -1.56 | 1.3E-03 |
| ENSG00000187398 | LUZP2          | 12.3    | -1.69 | 4.3E-02 | ENSG00000169604 | ANTXR1        | 1829.2  | -1.56 | 3.5E-04 |
| ENSG00000136040 | PLXNC1         | 387.0   | -1.69 | 2.8E-04 | ENSG00000072786 | STK10         | 137.6   | -1.55 | 1.5E-03 |
| ENSG00000177191 | B3GNT8         | 112.1   | -1.69 | 7.6E-04 | ENSG00000246082 | NUDT16P1      | 45.8    | -1.55 | 3.1E-02 |
| ENSG00000156466 | GDF6           | 137.6   | -1.69 | 1.6E-02 | ENSG00000259498 | RP11-244F12.3 | 480.5   | -1.55 | 1.1E-03 |
| ENSG00000181826 | RELL1          | 107.7   | -1.69 | 2.3E-04 | ENSG00000223518 | CSNK1A1P1     | 18.3    | -1.54 | 1.9E-02 |
| ENSG00000169184 | MN1            | 213.0   | -1.68 | 9.9E-03 | ENSG00000180233 | ZNRF2         | 495.7   | -1.54 | 1.2E-03 |
| ENSG00000230992 | FAM201B        | 21.0    | -1.68 | 1.9E-02 | ENSG00000197826 | C4orf22       | 11.2    | -1.54 | 3.8E-02 |
| ENSG00000244161 | FLNB-AS1       | 29.0    | -1.68 | 3.1E-03 | ENSG00000258376 | RP4-647C14.2  | 33.8    | -1.54 | 1.6E-02 |
| ENSG00000196353 | CPNE4          | 120.0   | -1.68 | 6.4E-04 | ENSG00000183580 | FBXL7         | 2975.1  | -1.54 | 1.6E-06 |
| ENSG00000154678 | PDE1C          | 698.2   | -1.68 | 3.4E-05 | ENSG00000106034 | CPED1         | 22.3    | -1.54 | 3.7E-02 |
| ENSG00000203952 | CCDC160        | 55.5    | -1.68 | 1.5E-03 | ENSG00000183166 | CALN1         | 584.3   | -1.54 | 2.0E-02 |
| ENSG00000197852 | FAM212B        | 852.9   | -1.67 | 3.7E-11 | ENSG00000250448 | RP11-1902.2   | 24.3    | -1.53 | 1.8E-02 |
| ENSG00000120937 | NPPB           | 2368.8  | -1.67 | 4.0E-02 | ENSG00000162595 | DIRAS3        | 349.7   | -1.53 | 1.8E-03 |
| ENSG00000205213 | LGR4           | 4771.3  | -1.67 | 4.1E-09 | ENSG00000139926 | FRMD6         | 73.5    | -1.53 | 2.5E-03 |
| ENSG00000129474 | AJUBA          | 1342.6  | -1.67 | 3.9E-10 | ENSG00000260837 | RP11-434B12.1 | 474.5   | -1.53 | 8.4E-11 |
| ENSG00000151572 | ANO4           | 51.0    | -1.66 | 9.5E-03 | ENSG00000168140 | VASN          | 471.5   | -1.52 | 5.3E-04 |
| ENSG00000164099 | PRSS12         | 109.4   | -1.66 | 5.8E-04 | ENSG00000162520 | SYNC          | 141.6   | -1.52 | 2.2E-05 |
| ENSG00000143179 | UCK2           | 482.2   | -1.66 | 4.1E-05 | ENSG00000114737 | CISH          | 344.8   | -1.51 | 8.7E-10 |
| ENSG00000267848 |                | 11.6    | -1.66 | 2.2E-02 | ENSG00000164056 | SPRY1         | 256.3   | -1.51 | 1.4E-03 |
| ENSG00000134602 | STK26          | 401.0   | -1.66 | 3.8E-05 | ENSG00000102554 | KLF5          | 52.5    | -1.51 | 1.1E-02 |
| ENSG00000110841 | PPF1BP1        | 2834.2  | -1.66 | 2.6E-07 | ENSG00000159176 | CSRPI         | 991.8   | -1.51 | 4.5E-03 |
| ENSG00000246090 | RP11-696N14.1  | 62.5    | -1.66 | 1.4E-03 | ENSG00000146242 | TPBG          | 50.1    | -1.51 | 1.2E-03 |
| ENSG00000131634 | TMEM204        | 9.2     | -1.66 | 3.4E-02 | ENSG00000166974 | MAPRE2        | 2883.1  | -1.51 | 4.9E-11 |
| ENSG00000165072 | MAMDC2         | 16.2    | -1.65 | 1.9E-02 | ENSG00000230910 | RP3-525N10.2  | 18.1    | -1.50 | 3.9E-02 |
| ENSG00000110400 | PVRL1          | 1832.3  | -1.65 | 6.9E-07 | ENSG00000086289 | EPDR1         | 328.5   | -1.50 | 3.2E-03 |
| ENSG00000135312 | HTR1B          | 21.7    | -1.65 | 1.8E-03 | ENSG00000103184 | SEC14L5       | 208.7   | -1.50 | 5.2E-04 |
| ENSG00000105810 | CDK6           | 2342.3  | -1.64 | 4.7E-11 | ENSG0000013016  | EHD3          | 2162.1  | -1.49 | 4.9E-04 |
| ENSG00000119943 | PYROXD2        | 701.5   | -1.64 | 1.4E-14 | ENSG00000184349 | EFNA5         | 524.2   | -1.49 | 1.1E-07 |
| ENSG00000259886 |                | 10.2    | -1.64 | 4.3E-02 | ENSG00000109436 | TBC1D9        | 497.9   | -1.49 | 1.9E-03 |
| ENSG00000124813 | RUNX2          | 39.5    | -1.64 | 6.8E-03 | ENSG00000179954 | SSC5D         | 57.5    | -1.49 | 4.2E-02 |
| ENSG00000169439 | SDC2           | 717.8   | -1.63 | 1.8E-04 | ENSG00000006468 | ETV1          | 1301.1  | -1.49 | 2.1E-05 |
| ENSG00000172164 | SNTB1          | 19.1    | -1.63 | 1.3E-02 | ENSG00000217165 | ANKRD18EP     | 53.8    | -1.48 | 1.6E-03 |
| ENSG00000186073 | C15orf41       | 1541.0  | -1.63 | 1.2E-06 | ENSG00000114019 | AMOTL2        | 1194.6  | -1.48 | 1.3E-09 |
| ENSG00000250392 | RP11-700N1.1   | 31.0    | -1.62 | 1.6E-02 | ENSG00000102547 | CAB39L        | 706.2   | -1.48 | 5.1E-06 |
| ENSG00000129009 | ISLR           | 107.3   | -1.62 | 3.5E-02 | ENSG00000174348 | PODN          | 684.2   | -1.48 | 1.6E-05 |
| ENSG00000164484 | TMEM200A       | 8.8     | -1.62 | 4.6E-02 | ENSG00000167244 | IGF2          | 38473.8 | -1.48 | 1.0E-02 |
| ENSG00000233280 |                | 321.1   | -1.62 | 1.5E-03 | ENSG00000231419 | LINC00689     | 13.8    | -1.48 | 4.9E-02 |
| ENSG00000166482 | MFAP4          | 4814.5  | -1.61 | 1.3E-05 | ENSG00000100605 | ITPK1         | 958.3   | -1.48 | 8.6E-06 |
| ENSG00000136158 | SPRY2          | 733.1   | -1.61 | 9.5E-07 | ENSG00000169174 | PCSK9         | 22.9    | -1.47 | 3.5E-02 |
| ENSG00000226403 | RP11-31F19.1   | 116.1   | -1.61 | 2.7E-05 | ENSG00000143799 | PARP1         | 3610.3  | -1.47 | 4.0E-08 |
| ENSG00000128283 | CDC42EP1       | 64.7    | -1.61 | 2.0E-02 | ENSG00000162383 | SLC1A7        | 24.0    | -1.47 | 3.4E-02 |
| ENSG00000242265 | PEG10          | 10933.1 | -1.61 | 6.1E-04 | ENSG00000158966 | CACHD1        | 957.4   | -1.47 | 1.1E-02 |
| ENSG00000134954 | ETS1           | 148.8   | -1.61 | 2.9E-04 | ENSG00000269952 | RP11-324I22.3 | 10.9    | -1.47 | 4.3E-02 |
| ENSG00000130055 | GDPD2          | 23.8    | -1.61 | 4.1E-03 | ENSG00000129538 | RNASE1        | 19.4    | -1.47 | 3.0E-02 |
| ENSG00000115963 | RND3           | 575.3   | -1.61 | 5.2E-07 | ENSG00000151388 | ADAMTS12      | 233.3   | -1.46 | 1.5E-02 |
| ENSG00000138758 | SEPT11         | 1150.5  | -1.61 | 5.8E-04 | ENSG00000146386 | ABRACL        | 40.1    | -1.46 | 1.0E-02 |
| ENSG00000031081 | ARHGAP31       | 3731.5  | -1.60 | 1.5E-04 | ENSG00000150760 | DOCK1         | 1212.6  | -1.46 | 1.0E-06 |
| ENSG00000112419 | PHACTR2        | 974.9   | -1.60 | 3.4E-14 | ENSG00000120833 | SOCS2         | 155.1   | -1.46 | 6.9E-04 |
| ENSG00000163288 | GABRB1         | 10.2    | -1.60 | 4.5E-02 | ENSG00000214357 | NEURL1B       | 685.1   | -1.46 | 1.3E-04 |
| ENSG00000095794 | CREM           | 653.9   | -1.60 | 7.5E-08 | ENSG00000170571 | EMB           | 132.7   | -1.45 | 5.7E-03 |
| ENSG00000163380 | LMOD3          | 1154.8  | -1.60 | 8.0E-03 | ENSG00000246662 | LINC00535     | 21.9    | -1.45 | 3.7E-02 |
| ENSG00000206538 | VGLL3          | 66.1    | -1.60 | 4.0E-02 | ENSG00000076356 | PLXNA2        | 660.7   | -1.45 | 2.9E-06 |
| ENSG00000186340 | THBS2          | 296.8   | -1.60 | 1.8E-02 | ENSG00000116132 | PRRX1         | 543.5   | -1.44 | 2.8E-02 |

|                  |               |         |       |         |                 |               |         |       |         |
|------------------|---------------|---------|-------|---------|-----------------|---------------|---------|-------|---------|
| ENSG00000149591  | TAGLN         | 1061.2  | -1.44 | 1.7E-02 | ENSG00000121577 | POPDC2        | 8656.4  | -1.32 | 8.7E-07 |
| ENSG00000115841  | RMDN2         | 73.6    | -1.44 | 2.1E-03 | ENSG00000091656 | ZFHX4         | 143.2   | -1.32 | 2.2E-02 |
| ENSG00000182263  | FIGN          | 898.8   | -1.43 | 2.6E-09 | ENSG00000184838 | PRR16         | 82.6    | -1.32 | 3.3E-02 |
| ENSG00000163092  | XIRP2         | 945.7   | -1.43 | 7.3E-03 | ENSG00000099139 | PCSK5         | 80.3    | -1.32 | 8.9E-03 |
| ENSG00000157502  | MUM1L1        | 1582.1  | -1.43 | 4.2E-07 | ENSG00000178665 | ZNF713        | 136.4   | -1.32 | 1.7E-06 |
| ENSG00000162493  | PDPN          | 917.9   | -1.43 | 5.1E-12 | ENSG00000132938 | MTUS2         | 2247.8  | -1.31 | 9.3E-07 |
| ENSG00000107201  | DDX58         | 473.6   | -1.43 | 3.9E-02 | ENSG00000006756 | ARSD          | 426.9   | -1.31 | 1.2E-05 |
| ENSG00000153071  | DAB2          | 120.7   | -1.43 | 2.4E-03 | ENSG00000197702 | PARVA         | 843.9   | -1.31 | 3.6E-06 |
| ENSG00000068079  | IFI35         | 172.2   | -1.42 | 2.3E-02 | ENSG00000166128 | RAB8B         | 282.2   | -1.31 | 4.9E-02 |
| ENSG00000019549  | SNAI2         | 33.1    | -1.42 | 4.5E-02 | ENSG00000131094 | CIQL1         | 687.3   | -1.31 | 6.3E-05 |
| ENSG00000198771  | RCSD1         | 2320.5  | -1.42 | 7.5E-11 | ENSG00000135835 | KIAA1614      | 63.7    | -1.31 | 1.2E-03 |
| ENSG00000114738  | MAPKAPK3      | 2937.7  | -1.42 | 4.6E-08 | ENSG00000134986 | NREP          | 20905.0 | -1.31 | 3.0E-13 |
| ENSG00000070193  | FGF10         | 58.9    | -1.42 | 2.7E-02 | ENSG00000102780 | DGKH          | 228.0   | -1.31 | 3.7E-04 |
| ENSG00000131969  | ABHD12B       | 19.6    | -1.41 | 2.4E-02 | ENSG00000250981 | RP11-19O2.1   | 144.7   | -1.30 | 1.6E-04 |
| ENSG00000021826  | CPS1          | 215.0   | -1.41 | 2.5E-05 | ENSG00000127955 | GNAI1         | 393.7   | -1.30 | 6.0E-03 |
| ENSG00000184384  | MAML2         | 237.7   | -1.41 | 2.7E-04 | ENSG00000047365 | ARAP2         | 128.7   | -1.30 | 2.1E-03 |
| ENSG00000122012  | SV2C          | 159.2   | -1.41 | 9.4E-03 | ENSG00000145632 | PLK2          | 692.4   | -1.30 | 3.6E-03 |
| ENSG00000100100  | PIK3IP1       | 282.5   | -1.41 | 2.8E-03 | ENSG00000154556 | SORBS2        | 15315.2 | -1.30 | 2.2E-05 |
| ENSG00000223652  | AC106786.1    | 20.9    | -1.41 | 2.3E-02 | ENSG00000147606 | SLC26A7       | 50.6    | -1.30 | 9.7E-03 |
| ENSG00000122863  | CHST3         | 367.0   | -1.41 | 2.6E-03 | ENSG00000116991 | SIPA1L2       | 5692.4  | -1.30 | 2.0E-04 |
| ENSG00000109881  | CCDC34        | 558.5   | -1.41 | 1.4E-04 | ENSG00000101463 | SYNDIG1       | 438.4   | -1.29 | 3.2E-03 |
| ENSG00000171914  | TLN2          | 1859.4  | -1.41 | 8.8E-12 | ENSG00000138646 | HERC5         | 152.4   | -1.29 | 4.6E-02 |
| ENSG000000213694 | S1PR3         | 792.6   | -1.41 | 2.6E-03 | ENSG00000214262 | ANKRD36BP1    | 56.8    | -1.29 | 3.3E-02 |
| ENSG00000261553  | RP11-29G8.3   | 35.8    | -1.41 | 2.8E-03 | ENSG00000077684 | JADE1         | 693.9   | -1.29 | 2.9E-06 |
| ENSG00000120658  | ENOX1         | 173.3   | -1.41 | 6.5E-03 | ENSG00000122779 | TRIM24        | 2675.2  | -1.28 | 1.2E-05 |
| ENSG00000227885  | RP11-79N23.1  | 25.8    | -1.40 | 4.1E-03 | ENSG00000215218 | UBE2QL1       | 126.2   | -1.28 | 1.3E-02 |
| ENSG00000204682  | CASC10        | 484.4   | -1.40 | 2.5E-04 | ENSG00000134138 | MEIS2         | 3897.4  | -1.28 | 2.4E-05 |
| ENSG00000117289  |               | 6291.8  | -1.40 | 3.0E-02 | ENSG00000179277 | MEIS3P1       | 32.8    | -1.28 | 1.1E-02 |
| ENSG00000227028  | SLC8A1-AS1    | 32.4    | -1.40 | 2.5E-02 | ENSG00000071205 | ARHGAP10      | 486.5   | -1.28 | 3.8E-09 |
| ENSG00000149212  | SEN3          | 803.3   | -1.40 | 2.9E-03 | ENSG00000176887 | SOX11         | 655.2   | -1.28 | 6.4E-06 |
| ENSG00000198324  | FAM109A       | 384.7   | -1.40 | 6.2E-09 | ENSG00000156052 | GNAQ          | 558.8   | -1.27 | 2.6E-04 |
| ENSG00000168135  | KCNJ4         | 425.1   | -1.40 | 3.4E-04 | ENSG00000141338 | ABCA8         | 620.5   | -1.27 | 6.1E-04 |
| ENSG00000130600  | H19           | 34593.2 | -1.40 | 1.0E-02 | ENSG00000198842 | DUSP27        | 2362.0  | -1.27 | 1.1E-07 |
| ENSG00000049323  | LTBP1         | 6069.3  | -1.40 | 2.8E-06 | ENSG00000151693 | ASAP2         | 158.8   | -1.27 | 1.8E-03 |
| ENSG00000185737  | NRG3          | 28.2    | -1.40 | 4.2E-02 | ENSG00000146859 | TMEM140       | 89.8    | -1.27 | 1.7E-02 |
| ENSG00000114450  | GNB4          | 246.8   | -1.40 | 1.4E-03 | ENSG00000196376 | SLC35F1       | 261.9   | -1.27 | 3.1E-03 |
| ENSG00000116783  | TNNI3K        | 563.1   | -1.39 | 1.7E-03 | ENSG00000092531 | SNAP23        | 614.8   | -1.27 | 3.4E-07 |
| ENSG00000145284  | SCD5          | 518.9   | -1.39 | 6.1E-04 | ENSG00000188215 | DCUN1D3       | 92.0    | -1.26 | 1.1E-03 |
| ENSG00000106018  | VIPR2         | 262.1   | -1.39 | 2.0E-02 | ENSG00000152503 | TRIM36        | 121.8   | -1.26 | 1.9E-02 |
| ENSG00000102271  | KLHL4         | 487.7   | -1.39 | 1.2E-06 | ENSG00000198756 | COLGALT2      | 428.2   | -1.26 | 4.7E-04 |
| ENSG00000186354  | C9orf47       | 74.5    | -1.39 | 8.9E-04 | ENSG00000114554 | PLXNA1        | 2148.6  | -1.26 | 1.1E-09 |
| ENSG00000260604  | RP1-140K8.5   | 1198.1  | -1.39 | 1.1E-02 | ENSG00000136720 | HS6ST1        | 306.7   | -1.26 | 1.7E-03 |
| ENSG00000097096  | SYDE2         | 436.6   | -1.39 | 1.4E-05 | ENSG00000106078 | COBL          | 661.8   | -1.26 | 3.0E-02 |
| ENSG00000018699  | TTC27         | 247.8   | -1.38 | 2.6E-06 | ENSG00000168246 | UBTD2         | 533.4   | -1.26 | 3.1E-06 |
| ENSG00000137331  | IER3          | 469.5   | -1.38 | 8.5E-04 | ENSG00000175920 | DOK7          | 607.9   | -1.26 | 1.7E-06 |
| ENSG00000124920  | MYRF          | 873.1   | -1.38 | 3.0E-03 | ENSG00000198088 | NUP62CL       | 29.1    | -1.25 | 1.9E-02 |
| ENSG00000177374  | HIC1          | 68.2    | -1.38 | 2.9E-02 | ENSG00000058091 | CDK14         | 1560.1  | -1.25 | 1.2E-05 |
| ENSG00000204764  | RANBP17       | 82.5    | -1.38 | 2.3E-04 | ENSG00000164024 | METAP1        | 1222.8  | -1.25 | 1.7E-06 |
| ENSG00000196562  | SULF2         | 214.2   | -1.38 | 3.1E-02 | ENSG00000027075 | PRKCH         | 343.6   | -1.25 | 2.6E-03 |
| ENSG00000042781  | USH2A         | 27.9    | -1.38 | 2.7E-02 | ENSG00000163431 | LMOD1         | 1157.5  | -1.25 | 1.3E-03 |
| ENSG00000214711  | CAPN14        | 48.3    | -1.38 | 4.1E-03 | ENSG00000139174 | PRICKLE1      | 1115.7  | -1.25 | 1.3E-09 |
| ENSG00000164932  | CTHRC1        | 29.8    | -1.37 | 2.4E-02 | ENSG00000153561 | RMNDSA        | 2826.8  | -1.25 | 1.7E-08 |
| ENSG00000112182  | BACH2         | 268.4   | -1.37 | 1.1E-04 | ENSG00000177311 | ZBTB38        | 612.4   | -1.25 | 4.5E-06 |
| ENSG00000107562  | CXCL12        | 1878.8  | -1.37 | 3.4E-02 | ENSG00000151320 | AKAP6         | 2277.4  | -1.25 | 1.0E-04 |
| ENSG00000004776  | HSPB6         | 1764.3  | -1.37 | 1.1E-02 | ENSG00000138771 | SHROOM3       | 1172.5  | -1.25 | 1.9E-03 |
| ENSG00000152642  | GPD1L         | 3022.2  | -1.37 | 3.5E-05 | ENSG00000144908 | ALDH1L1       | 53.8    | -1.24 | 7.6E-03 |
| ENSG00000163492  | CCDC141       | 1727.5  | -1.36 | 3.6E-04 | ENSG00000165675 | ENOX2         | 147.8   | -1.24 | 8.6E-04 |
| ENSG00000029153  | ARNTL2        | 65.5    | -1.36 | 2.0E-04 | ENSG00000183688 | FAM101B       | 65.8    | -1.24 | 3.3E-03 |
| ENSG00000271155  | RP11-435O5.5  | 22.9    | -1.35 | 1.7E-02 | ENSG00000233836 | RP11-255H23.2 | 39.9    | -1.24 | 3.0E-02 |
| ENSG00000251216  | RP11-161D15.3 | 25.4    | -1.35 | 1.1E-02 | ENSG00000140416 | TPM1          | 86002.2 | -1.24 | 5.7E-06 |
| ENSG00000078053  | AMPH          | 215.3   | -1.35 | 1.5E-04 | ENSG00000183853 | KIRREL        | 679.6   | -1.24 | 5.5E-03 |
| ENSG00000121039  | RDH10         | 379.3   | -1.34 | 5.0E-03 | ENSG00000130119 | GNL3L         | 139.4   | -1.24 | 4.9E-03 |
| ENSG00000171681  | ATF7IP        | 810.3   | -1.34 | 2.0E-06 | ENSG00000122591 | FAM126A       | 436.3   | -1.24 | 6.6E-08 |
| ENSG00000184697  | CLDN6         | 290.5   | -1.34 | 5.2E-03 | ENSG00000137198 | GMPR          | 561.8   | -1.23 | 3.9E-04 |
| ENSG00000188778  | ADRB3         | 103.0   | -1.34 | 2.9E-02 | ENSG00000250899 | RP11-253E3.3  | 162.3   | -1.23 | 7.1E-04 |
| ENSG00000156219  | ART3          | 379.8   | -1.34 | 3.7E-03 | ENSG00000253846 | PCDHGA10      | 65.8    | -1.23 | 7.5E-03 |
| ENSG00000168405  | CMAHP         | 164.1   | -1.33 | 1.6E-02 | ENSG00000268358 |               | 28.1    | -1.23 | 2.3E-02 |
| ENSG00000059378  | PARP12        | 405.0   | -1.33 | 1.4E-02 | ENSG00000178385 | PLEKHM3       | 80.4    | -1.23 | 2.7E-02 |
| ENSG00000168477  | TNXB          | 141.8   | -1.33 | 2.0E-02 | ENSG00000138316 | ADAMTS14      | 1015.7  | -1.22 | 6.3E-03 |
| ENSG00000103994  | ZNF106        | 2598.0  | -1.33 | 2.4E-07 | ENSG00000073711 | PPP2R3A       | 1842.0  | -1.22 | 1.1E-10 |
| ENSG00000270959  | LPP-AS2       | 126.9   | -1.33 | 4.0E-05 | ENSG00000197894 | ADH5          | 2056.5  | -1.22 | 3.1E-12 |
| ENSG00000247081  | BAALC-AS1     | 42.4    | -1.33 | 7.9E-03 | ENSG00000172159 | FRMD3         | 972.8   | -1.22 | 1.0E-06 |

|                 |               |        |       |         |                 |               |        |       |         |
|-----------------|---------------|--------|-------|---------|-----------------|---------------|--------|-------|---------|
| ENSG00000260398 | RP11-594N15.3 | 171.2  | -1.22 | 7.3E-04 | ENSG00000158008 | EXTL1         | 323.1  | -1.11 | 1.9E-02 |
| ENSG00000242539 | AC007620.3    | 58.3   | -1.22 | 4.9E-03 | ENSG00000112218 | GPR63         | 111.6  | -1.11 | 3.9E-04 |
| ENSG00000124406 | ATP8A1        | 435.8  | -1.22 | 1.4E-02 | ENSG00000171357 | LURAP1        | 86.3   | -1.11 | 4.5E-03 |
| ENSG00000237463 | RP11-280O1.2  | 71.8   | -1.22 | 1.0E-02 | ENSG00000177098 | SCN4B         | 51.3   | -1.11 | 2.4E-02 |
| ENSG00000245694 | CRNDE         | 236.1  | -1.22 | 6.0E-05 | ENSG00000270504 | RP11-420L9.5  | 93.9   | -1.11 | 1.9E-02 |
| ENSG00000185483 | ROR1          | 1845.0 | -1.22 | 3.5E-03 | ENSG00000143067 | ZNF697        | 579.8  | -1.11 | 1.2E-03 |
| ENSG00000155034 | FBXL18        | 120.0  | -1.21 | 3.7E-03 | ENSG00000074416 | MGLL          | 333.6  | -1.11 | 3.6E-03 |
| ENSG00000071967 | CYBRD1        | 189.4  | -1.21 | 2.7E-02 | ENSG00000123124 | WWP1          | 1335.9 | -1.11 | 6.1E-06 |
| ENSG00000111912 | NCOA7         | 159.5  | -1.21 | 1.1E-03 | ENSG00000170456 | DENND5B       | 4246.7 | -1.11 | 3.6E-05 |
| ENSG00000115902 | SLC1A4        | 2613.1 | -1.21 | 1.3E-03 | ENSG00000157350 | ST3GAL2       | 1099.3 | -1.10 | 2.4E-06 |
| ENSG00000169247 | SH3TC2        | 313.3  | -1.21 | 2.9E-03 | ENSG00000145375 | SPATA5        | 52.2   | -1.10 | 9.9E-03 |
| ENSG00000149575 | SCN2B         | 233.5  | -1.21 | 4.0E-03 | ENSG00000235162 | C12orf75      | 778.0  | -1.10 | 7.7E-05 |
| ENSG00000166073 | GPR176        | 114.8  | -1.20 | 2.6E-03 | ENSG00000260214 |               | 287.9  | -1.10 | 9.1E-04 |
| ENSG00000185630 | PBX1          | 4819.7 | -1.20 | 3.1E-06 | ENSG00000184557 | SOCS3         | 317.3  | -1.10 | 4.6E-02 |
| ENSG00000067798 | NAV3          | 276.4  | -1.20 | 1.0E-03 | ENSG00000132256 | TRIM5         | 278.4  | -1.10 | 1.1E-03 |
| ENSG00000250588 | IQCI-SCHIP1   | 120.2  | -1.20 | 3.2E-03 | ENSG00000112852 | PCDHB2        | 295.1  | -1.10 | 4.4E-03 |
| ENSG00000140557 | ST8SIA2       | 208.4  | -1.20 | 1.8E-02 | ENSG00000213853 | EMP2          | 3043.1 | -1.10 | 7.3E-07 |
| ENSG00000137266 | SLC22A23      | 229.6  | -1.19 | 4.9E-02 | ENSG00000196159 | FAT4          | 466.0  | -1.10 | 2.0E-04 |
| ENSG00000158435 | CNOT11        | 2701.5 | -1.19 | 5.4E-04 | ENSG00000081377 | CDC14B        | 1417.3 | -1.10 | 3.0E-07 |
| ENSG00000163293 | NIPAL1        | 158.0  | -1.19 | 9.4E-03 | ENSG00000109686 | SH3D19        | 1786.7 | -1.10 | 9.1E-04 |
| ENSG00000138193 | PLCE1         | 383.4  | -1.19 | 4.0E-02 | ENSG00000109458 | GAB1          | 3509.0 | -1.09 | 1.2E-09 |
| ENSG00000100320 | RBFOX2        | 3546.9 | -1.19 | 6.0E-04 | ENSG00000151773 | CCDC122       | 62.4   | -1.09 | 2.4E-03 |
| ENSG00000183690 | EFHC2         | 44.5   | -1.19 | 2.1E-02 | ENSG00000186615 | KTNI-AS1      | 97.8   | -1.09 | 7.4E-04 |
| ENSG00000265356 | RP11-17M24.1  | 44.5   | -1.19 | 1.8E-02 | ENSG00000157927 | RADIL         | 338.3  | -1.09 | 3.4E-03 |
| ENSG00000186591 | UBE2H         | 5342.2 | -1.18 | 2.4E-05 | ENSG00000162757 | C1orf74       | 70.5   | -1.09 | 2.2E-03 |
| ENSG00000198399 | ITSN2         | 3190.4 | -1.18 | 4.1E-04 | ENSG00000166343 | MSS51         | 532.0  | -1.09 | 2.8E-06 |
| ENSG00000006007 | GDE1          | 1175.5 | -1.18 | 9.9E-10 | ENSG00000109452 | INPP4B        | 1518.7 | -1.09 | 3.0E-02 |
| ENSG00000100767 | PAPLN         | 248.0  | -1.18 | 3.4E-02 | ENSG00000128578 | STRIP2        | 5048.5 | -1.09 | 2.9E-05 |
| ENSG00000123689 | G0S2          | 1646.2 | -1.18 | 2.6E-02 | ENSG00000171444 | MCC           | 2803.0 | -1.09 | 1.4E-03 |
| ENSG00000075073 | TACR2         | 50.1   | -1.18 | 7.3E-03 | ENSG00000196588 | MKL1          | 1165.6 | -1.09 | 4.2E-04 |
| ENSG00000173705 | SUSD5         | 151.8  | -1.17 | 2.6E-02 | ENSG00000234961 | RP11-124N14.3 | 30.5   | -1.09 | 4.1E-02 |
| ENSG00000258987 | RP11-131H24.4 | 46.0   | -1.17 | 2.4E-02 | ENSG00000150347 | ARID5B        | 420.2  | -1.09 | 1.2E-02 |
| ENSG00000168334 | XIRP1         | 8142.0 | -1.17 | 2.3E-06 | ENSG00000164684 | ZNF704        | 2076.9 | -1.08 | 1.1E-03 |
| ENSG00000247934 | RP11-967K21.1 | 21.1   | -1.17 | 3.8E-02 | ENSG00000138604 | GLCE          | 437.7  | -1.08 | 1.1E-05 |
| ENSG00000113749 | HRH2          | 603.8  | -1.17 | 2.0E-02 | ENSG00000165617 | DACT1         | 855.3  | -1.08 | 8.1E-03 |
| ENSG00000138642 | HERC6         | 360.9  | -1.17 | 4.4E-02 | ENSG00000177354 | C10orf71      | 585.8  | -1.08 | 3.8E-05 |
| ENSG00000169871 | TRIM56        | 183.5  | -1.17 | 3.3E-02 | ENSG00000118922 | KLF12         | 1247.1 | -1.08 | 2.6E-04 |
| ENSG00000166326 | TRIM44        | 802.1  | -1.17 | 1.9E-03 | ENSG00000096060 | FKBP5         | 973.2  | -1.08 | 1.9E-02 |
| ENSG00000089472 | HEPH          | 6699.5 | -1.17 | 3.0E-08 | ENSG00000189409 | MMP23B        | 108.0  | -1.08 | 1.2E-02 |
| ENSG00000162924 | REL           | 56.5   | -1.16 | 6.8E-03 | ENSG00000141627 | DYM           | 685.4  | -1.08 | 2.0E-04 |
| ENSG00000172954 | LCLAT1        | 591.1  | -1.16 | 1.2E-04 | ENSG00000152492 | CCDC50        | 1494.4 | -1.07 | 1.7E-08 |
| ENSG00000180914 | OXTR          | 298.3  | -1.16 | 2.8E-06 | ENSG00000136153 | LMO7          | 4701.7 | -1.07 | 4.7E-05 |
| ENSG00000157216 | SSBP3         | 711.6  | -1.16 | 2.3E-03 | ENSG00000111077 | TNS2          | 1441.5 | -1.07 | 3.7E-03 |
| ENSG00000135074 | ADAM19        | 1348.8 | -1.16 | 1.4E-02 | ENSG00000154122 | ANKH          | 3384.2 | -1.07 | 1.2E-05 |
| ENSG00000197991 | PCDH20        | 1296.8 | -1.16 | 4.4E-04 | ENSG00000143384 | MCL1          | 2483.4 | -1.07 | 9.7E-05 |
| ENSG00000067082 | KLF6          | 753.6  | -1.16 | 2.2E-03 | ENSG00000122550 | KLHL7         | 1794.9 | -1.07 | 1.1E-07 |
| ENSG00000130429 | ARPC1B        | 266.5  | -1.15 | 1.7E-02 | ENSG00000134313 | KIDINS220     | 5926.2 | -1.06 | 1.4E-03 |
| ENSG00000107771 | CCSER2        | 2130.9 | -1.15 | 1.9E-05 | ENSG00000198964 | SGMS1         | 939.3  | -1.06 | 2.6E-03 |
| ENSG00000177570 | SAMD12        | 479.7  | -1.15 | 8.9E-06 | ENSG00000143466 |               | 54.6   | -1.06 | 2.4E-02 |
| ENSG00000111371 | SLC38A1       | 5041.4 | -1.15 | 5.5E-03 | ENSG00000165806 | CASP7         | 471.3  | -1.06 | 6.0E-04 |
| ENSG00000182985 | CADM1         | 1814.3 | -1.15 | 1.3E-06 | ENSG00000168675 | LDLRAD4       | 804.1  | -1.06 | 7.5E-06 |
| ENSG00000184304 | PRKD1         | 158.4  | -1.15 | 4.7E-03 | ENSG00000137962 | ARHGAP29      | 1182.6 | -1.06 | 2.5E-03 |
| ENSG00000168487 | BMP1          | 725.9  | -1.14 | 1.4E-04 | ENSG00000113248 | PCDHB15       | 186.0  | -1.06 | 3.0E-03 |
| ENSG00000146151 | HMGCLL1       | 368.1  | -1.14 | 3.3E-03 | ENSG00000109670 | FBXW7         | 713.5  | -1.06 | 6.4E-06 |
| ENSG00000213190 | MLLT11        | 1544.6 | -1.14 | 1.5E-03 | ENSG00000139350 | NEDD1         | 614.2  | -1.06 | 1.6E-07 |
| ENSG00000172458 | IL17D         | 117.2  | -1.13 | 1.5E-02 | ENSG00000139116 | KIF21A        | 2027.5 | -1.05 | 1.3E-04 |
| ENSG00000225345 | SNX18P3       | 38.9   | -1.13 | 1.6E-02 | ENSG00000082781 | ITGB5         | 1343.2 | -1.05 | 6.2E-03 |
| ENSG00000155380 | SLC16A1       | 6329.2 | -1.13 | 1.0E-04 | ENSG00000164576 | SAP30L        | 847.1  | -1.05 | 6.5E-07 |
| ENSG00000163075 | CFAP221       | 68.9   | -1.13 | 2.2E-03 | ENSG00000165118 | C9orf64       | 129.8  | -1.05 | 9.2E-04 |
| ENSG00000127946 | HIP1          | 937.6  | -1.13 | 1.3E-02 | ENSG00000070778 | PTPN21        | 2428.3 | -1.04 | 2.8E-05 |
| ENSG00000143499 | SMYD2         | 1489.4 | -1.12 | 4.8E-04 | ENSG00000104313 | EYA1          | 240.0  | -1.04 | 2.6E-02 |
| ENSG00000174306 | ZHX3          | 488.7  | -1.12 | 1.0E-04 | ENSG00000162692 | VCAM1         | 1706.6 | -1.04 | 3.5E-02 |
| ENSG00000162783 | IER5          | 282.7  | -1.12 | 7.6E-05 | ENSG00000113580 | NR3C1         | 1026.3 | -1.04 | 9.3E-04 |
| ENSG00000196154 | S100A4        | 233.4  | -1.12 | 1.9E-02 | ENSG00000105559 | PLEKHA4       | 1123.1 | -1.04 | 9.2E-03 |
| ENSG00000152779 | SLC16A12      | 686.2  | -1.12 | 5.2E-05 | ENSG00000166317 | SYNPO2L       | 9059.2 | -1.04 | 2.5E-02 |
| ENSG00000105926 | MPP6          | 106.7  | -1.12 | 3.6E-02 | ENSG00000128656 | CHN1          | 498.4  | -1.04 | 2.2E-04 |
| ENSG00000128274 | A4GALT        | 1889.1 | -1.12 | 9.0E-07 | ENSG00000166173 | LARP6         | 646.8  | -1.04 | 2.0E-05 |
| ENSG00000175115 | PACS1         | 3734.8 | -1.11 | 2.5E-06 | ENSG00000115896 | PLCL1         | 669.0  | -1.04 | 1.2E-03 |
| ENSG00000107438 | PDLIM1        | 3587.0 | -1.11 | 1.1E-05 | ENSG00000152104 | PTPN14        | 455.9  | -1.03 | 3.6E-03 |
| ENSG00000272373 |               | 33.2   | -1.11 | 4.5E-02 | ENSG00000182247 | UBE2E2        | 856.5  | -1.03 | 1.3E-03 |
| ENSG00000251664 | PCDHA12       | 117.5  | -1.11 | 1.1E-02 | ENSG00000265519 | CTD-3157E16.1 | 26.9   | -1.03 | 4.9E-02 |
| ENSG00000018408 | WWTR1         | 2390.5 | -1.11 | 2.4E-07 | ENSG00000119471 | HSDL2         | 1964.5 | -1.03 | 3.7E-06 |

|                 |               |         |       |         |                 |        |         |       |         |
|-----------------|---------------|---------|-------|---------|-----------------|--------|---------|-------|---------|
| ENSG00000176771 | NCKAP5        | 60.3    | -1.03 | 9.7E-03 | ENSG00000153721 | CNKSR3 | 399.2   | -1.02 | 2.8E-03 |
| ENSG00000079150 | FKBP7         | 71.1    | -1.03 | 3.4E-02 | ENSG00000101605 | MYOM1  | 21491.6 | -1.02 | 1.0E-04 |
| ENSG00000164211 | STAR4         | 6338.9  | -1.03 | 3.8E-07 | ENSG00000196843 | ARID5A | 411.2   | -1.01 | 2.2E-02 |
| ENSG00000119699 | TGFB3         | 124.4   | -1.03 | 3.6E-02 | ENSG00000132819 | RBM38  | 2375.9  | -1.01 | 6.4E-06 |
| ENSG00000164574 | GALNT10       | 278.4   | -1.03 | 1.1E-02 | ENSG00000168502 | MTCL1  | 146.4   | -1.01 | 4.1E-02 |
| ENSG00000261788 |               | 1041.3  | -1.03 | 5.3E-03 | ENSG00000186187 | ZNRF1  | 446.2   | -1.01 | 2.6E-05 |
| ENSG00000260482 | CTD-2196E14.9 | 77.9    | -1.03 | 4.0E-02 | ENSG00000153814 | JAZF1  | 1075.4  | -1.01 | 8.6E-05 |
| ENSG00000160392 | C19orf47      | 551.9   | -1.03 | 3.6E-06 | ENSG00000140600 | SH3GL3 | 245.7   | -1.01 | 3.7E-02 |
| ENSG00000121210 | KIAA0922      | 552.8   | -1.02 | 2.0E-04 | ENSG00000065882 | TBC1D1 | 2052.6  | -1.01 | 1.4E-05 |
| ENSG00000068697 | LAPTM4A       | 5317.1  | -1.02 | 1.7E-08 | ENSG00000132669 | RIN2   | 804.5   | -1.01 | 4.3E-03 |
| ENSG00000119866 | BCL11A        | 412.8   | -1.02 | 1.3E-05 | ENSG00000169926 | KLF13  | 1296.9  | -1.00 | 1.2E-02 |
| ENSG00000137575 | SDCBP         | 2335.6  | -1.02 | 3.0E-04 | ENSG00000175155 | YPEL2  | 1391.0  | -1.00 | 4.2E-03 |
| ENSG00000113272 | THG1L         | 130.6   | -1.02 | 2.4E-03 | ENSG00000180263 | FGD6   | 966.0   | -1.00 | 1.5E-05 |
| ENSG00000077522 | ACTN2         | 31470.5 | -1.02 | 5.7E-04 |                 |        |         |       |         |

**(B)** List of 1,037 transcripts with significantly higher expression in iPSC-aCMs compared to iPSC-vCMs.

| Ensembl ID      | Gene name     | Base mean | log <sub>2</sub> (aCMs/vCMs) | adj P value | Ensembl ID      | Gene name      | Base mean | log <sub>2</sub> (aCMs/vCMs) | adj P value |
|-----------------|---------------|-----------|------------------------------|-------------|-----------------|----------------|-----------|------------------------------|-------------|
| ENSG00000066248 | NGEF          | 88.2      | 4.35                         | 9.0E-25     | ENSG00000235890 | TSPEAR-AS1     | 197.9     | 2.90                         | 1.1E-10     |
| ENSG00000149927 | DOC2A         | 195.3     | 4.28                         | 1.1E-26     | ENSG00000165548 | TMEM63C        | 77.1      | 2.88                         | 6.3E-13     |
| ENSG00000168779 | SHOX2         | 971.6     | 4.27                         | 2.2E-17     | ENSG00000146648 | EGFR           | 616.7     | 2.87                         | 1.3E-32     |
| ENSG00000165841 | CYP2C19       | 12.8      | 4.09                         | 2.2E-08     | ENSG00000183454 | GRIN2A         | 27.3      | 2.83                         | 3.0E-06     |
| ENSG00000180537 | RNF182        | 158.3     | 4.06                         | 3.5E-14     | ENSG00000154162 | CDH12          | 223.3     | 2.83                         | 1.1E-06     |
| ENSG00000104725 |               | 184.2     | 4.02                         | 1.2E-16     | ENSG00000233429 | HOTAIRM1       | 128.0     | 2.82                         | 1.9E-10     |
| ENSG00000157087 | ATP2B2        | 210.4     | 3.97                         | 5.3E-21     | ENSG00000105650 | PDE4C          | 265.0     | 2.82                         | 2.1E-06     |
| ENSG00000119121 | TRPM6         | 25.8      | 3.94                         | 3.0E-10     | ENSG00000268518 | CTD-2545M3.8   | 32944.6   | 2.81                         | 4.3E-14     |
| ENSG00000126733 | DACH2         | 32.2      | 3.72                         | 7.1E-13     | ENSG00000229031 | RP11-666G4.1   | 20.4      | 2.80                         | 6.1E-04     |
| ENSG00000145708 | CRHBP         | 37.8      | 3.71                         | 4.2E-10     | ENSG00000126218 | F10            | 167.1     | 2.79                         | 3.2E-15     |
| ENSG00000196361 | ELAVL3        | 14.8      | 3.68                         | 1.9E-08     | ENSG00000231431 | FAR2P4         | 16.9      | 2.79                         | 4.2E-05     |
| ENSG00000105996 | HOXA2         | 66.1      | 3.65                         | 3.7E-09     | ENSG00000174326 | SLC16A11       | 19.9      | 2.78                         | 3.6E-07     |
| ENSG00000140279 | DUOX2         | 318.0     | 3.64                         | 6.4E-19     | ENSG00000239402 | CYP4F62P       | 9.6       | 2.78                         | 1.7E-04     |
| ENSG00000163814 | CDCP1         | 213.4     | 3.61                         | 5.1E-13     | ENSG00000261253 | AC137932.6     | 65.2      | 2.77                         | 2.8E-06     |
| ENSG00000139767 | SRRM4         | 129.4     | 3.59                         | 9.9E-16     | ENSG00000237512 | UNC5B-AS1      | 446.8     | 2.77                         | 5.4E-07     |
| ENSG00000103154 | NECAB2        | 45.6      | 3.58                         | 1.6E-10     | ENSG00000154316 | IDH            | 14.4      | 2.76                         | 4.3E-06     |
| ENSG00000175894 | TSPEAR        | 912.0     | 3.44                         | 8.3E-10     | ENSG00000170439 | METTL7B        | 206.3     | 2.76                         | 1.4E-13     |
| ENSG00000140274 | DUOXA2        | 42.9      | 3.44                         | 7.7E-12     | ENSG00000111728 | ST8SIA1        | 70.6      | 2.76                         | 3.3E-08     |
| ENSG00000253552 | HOXA-AS2      | 75.9      | 3.42                         | 2.9E-09     | ENSG00000170324 | FRMPD2         | 85.4      | 2.75                         | 5.4E-05     |
| ENSG00000228477 | RP3-342P20.2  | 15.5      | 3.42                         | 1.1E-05     | ENSG00000085552 | IGSF9          | 2004.8    | 2.74                         | 1.5E-08     |
| ENSG00000075043 | KCNQ2         | 209.1     | 3.40                         | 1.7E-18     | ENSG00000163239 | TDRD10         | 11.8      | 2.74                         | 2.0E-04     |
| ENSG00000073734 | ABCB11        | 25.1      | 3.38                         | 5.1E-09     | ENSG00000102878 | HSF4           | 870.3     | 2.74                         | 1.7E-08     |
| ENSG00000105997 | HOXA3         | 221.5     | 3.35                         | 2.9E-09     | ENSG00000187210 | GCNT1          | 135.8     | 2.74                         | 1.2E-11     |
| ENSG00000189410 | SH2D5         | 22.5      | 3.33                         | 3.5E-10     | ENSG00000137463 | MGARP          | 272.1     | 2.73                         | 2.6E-11     |
| ENSG00000166589 | CDH16         | 21.9      | 3.28                         | 7.3E-09     | ENSG00000259910 | RP11-616M22.2  | 24.4      | 2.73                         | 6.7E-07     |
| ENSG00000168824 | D4S234E       | 415.6     | 3.28                         | 1.3E-26     | ENSG00000172828 | CES3           | 189.8     | 2.73                         | 1.5E-20     |
| ENSG00000053108 | FSTL4         | 34.9      | 3.19                         | 3.2E-08     | ENSG00000255090 | MIR100HG       | 21.1      | 2.72                         | 3.2E-05     |
| ENSG00000214402 | LCNL1         | 360.9     | 3.19                         | 3.5E-17     | ENSG00000235033 | RP11-611I3.3   | 33.3      | 2.72                         | 5.0E-07     |
| ENSG00000197576 | HOXA4         | 74.7      | 3.16                         | 2.4E-07     | ENSG00000130595 | TNNT3          | 48.7      | 2.72                         | 2.5E-06     |
| ENSG00000171303 | KCNK3         | 548.8     | 3.16                         | 1.4E-13     | ENSG00000198732 | SMOC1          | 83.3      | 2.72                         | 2.1E-05     |
| ENSG00000260403 | RP11-616M22.1 | 44.0      | 3.15                         | 1.7E-08     | ENSG00000240253 | FAR2P3         | 11.1      | 2.72                         | 2.1E-04     |
| ENSG00000116176 | TPSG1         | 49.0      | 3.14                         | 1.0E-07     | ENSG00000103546 | SLC6A2         | 46.5      | 2.71                         | 1.1E-05     |
| ENSG00000248441 | LINC01197     | 25.8      | 3.12                         | 1.5E-06     | ENSG00000175745 | NR2F1          | 484.9     | 2.71                         | 2.8E-08     |
| ENSG00000166145 | SPINT1        | 605.8     | 3.10                         | 9.5E-16     | ENSG00000119535 | CSF3R          | 35.2      | 2.69                         | 6.4E-07     |
| ENSG00000141750 | STAC2         | 141.4     | 3.10                         | 3.2E-10     | ENSG00000130037 | KCNA5          | 1013.5    | 2.69                         | 4.2E-07     |
| ENSG00000146530 | VWDE          | 1284.4    | 3.10                         | 6.6E-19     | ENSG00000163053 | SLC16A14       | 321.2     | 2.66                         | 4.7E-11     |
| ENSG00000163630 | SYNPR         | 27.7      | 3.06                         | 1.2E-07     | ENSG00000163531 | NFASC          | 1144.4    | 2.65                         | 3.1E-06     |
| ENSG00000249992 | TMEM158       | 17.4      | 3.05                         | 4.4E-07     | ENSG00000179242 | CDH4           | 154.0     | 2.64                         | 4.8E-06     |
| ENSG00000156298 | TSPAN7        | 410.1     | 3.02                         | 1.3E-18     | ENSG00000119715 | ESRRB          | 232.9     | 2.64                         | 4.3E-09     |
| ENSG00000254815 | RP11-496I9.1  | 195.6     | 3.02                         | 1.6E-14     | ENSG00000184613 | NELL2          | 297.9     | 2.63                         | 2.8E-05     |
| ENSG00000074211 | PPP2R2C       | 99.6      | 2.99                         | 1.3E-06     | ENSG00000005961 | ITGA2B         | 155.3     | 2.63                         | 3.5E-17     |
| ENSG00000248746 | ACTN3         | 193.8     | 2.98                         | 6.7E-06     | ENSG00000108849 | PPY            | 9.6       | 2.62                         | 1.3E-03     |
| ENSG00000180815 | MAP3K15       | 194.5     | 2.98                         | 1.1E-06     | ENSG00000138944 | KIAA1644       | 289.9     | 2.60                         | 2.7E-09     |
| ENSG00000155980 | KIF5A         | 76.0      | 2.97                         | 2.8E-10     | ENSG00000146215 | CRIP3          | 189.6     | 2.60                         | 1.6E-05     |
| ENSG00000161509 | GRIN2C        | 25.1      | 2.96                         | 4.5E-08     | ENSG00000262920 | RP11-1260E13.1 | 8.7       | 2.59                         | 1.2E-03     |
| ENSG00000005020 | SKAP2         | 488.1     | 2.96                         | 1.3E-10     | ENSG00000132692 | BCAN           | 8.0       | 2.59                         | 7.2E-04     |
| ENSG00000107317 | PTGDS         | 3700.7    | 2.96                         | 1.5E-21     | ENSG00000142765 | SYTL1          | 132.1     | 2.59                         | 1.9E-13     |
| ENSG00000221986 | MYBPHL        | 898.4     | 2.95                         | 2.3E-07     | ENSG00000148926 | ADM            | 2016.2    | 2.58                         | 3.3E-08     |
| ENSG00000104722 | NEFM          | 54.4      | 2.94                         | 3.3E-09     | ENSG00000183091 | NEB            | 288.9     | 2.57                         | 2.1E-10     |
| ENSG00000232002 | AC093642.6    | 27.8      | 2.91                         | 7.9E-05     | ENSG00000130558 | OLFM1          | 191.8     | 2.57                         | 2.3E-06     |
| ENSG00000187957 | DNER          | 85.3      | 2.91                         | 4.2E-08     | ENSG00000106004 | HOXA5          | 40.1      | 2.57                         | 2.7E-04     |

|                 |               |         |      |         |                 |               |        |      |         |
|-----------------|---------------|---------|------|---------|-----------------|---------------|--------|------|---------|
| ENSG0000076864  | RAP1GAP       | 473.2   | 2.57 | 1.7E-15 | ENSG00000136542 | GALNT5        | 275.7  | 2.26 | 8.2E-07 |
| ENSG0000060709  | RIMBP2        | 37.5    | 2.56 | 2.8E-05 | ENSG00000132872 | SYT4          | 7.7    | 2.26 | 8.1E-03 |
| ENSG00000199157 | MIR208A       | 8.0     | 2.54 | 5.4E-04 | ENSG00000140961 | OSGIN1        | 43.2   | 2.23 | 1.8E-04 |
| ENSG00000165899 | OTOGL         | 561.2   | 2.54 | 3.9E-07 | ENSG00000164078 | MST1R         | 7.9    | 2.23 | 5.4E-03 |
| ENSG00000102924 | CBLN1         | 119.8   | 2.54 | 1.0E-04 | ENSG00000102003 | SYP           | 38.3   | 2.23 | 1.8E-04 |
| ENSG00000150045 | KLRF1         | 20.6    | 2.54 | 1.1E-04 | ENSG00000183914 | DNAH2         | 154.5  | 2.22 | 1.2E-05 |
| ENSG00000136999 | NOV           | 60.3    | 2.53 | 1.1E-08 | ENSG00000091409 | ITGA6         | 278.3  | 2.22 | 3.2E-13 |
| ENSG00000259666 | LINGO1-AS1    | 50.5    | 2.51 | 3.4E-04 | ENSG00000181773 | GPR3          | 38.6   | 2.22 | 5.6E-04 |
| ENSG00000157388 | CACNA1D       | 923.2   | 2.51 | 4.7E-12 | ENSG00000261159 | RP11-723O4.9  | 10.3   | 2.22 | 4.3E-03 |
| ENSG00000112232 | KHDRBS2       | 28.0    | 2.49 | 6.5E-06 | ENSG00000145808 | ADAMTS19      | 931.9  | 2.22 | 2.1E-08 |
| ENSG00000164683 | HEY1          | 210.8   | 2.49 | 2.2E-18 | ENSG00000108924 | HLF           | 24.9   | 2.21 | 5.4E-04 |
| ENSG00000157093 | LYZL4         | 21.5    | 2.48 | 3.7E-04 | ENSG00000170074 | FAM153A       | 154.0  | 2.21 | 7.0E-08 |
| ENSG00000118702 | GHRH          | 128.7   | 2.48 | 3.7E-03 | ENSG00000157445 | CACNA2D3      | 114.2  | 2.21 | 1.7E-06 |
| ENSG00000168071 | CCDC88B       | 218.9   | 2.48 | 2.6E-13 | ENSG00000165973 | NELL1         | 152.6  | 2.20 | 9.4E-05 |
| ENSG00000117834 | SLC5A9        | 48.1    | 2.48 | 2.6E-05 | ENSG00000171798 | KNDC1         | 213.6  | 2.20 | 7.8E-14 |
| ENSG00000174640 | SLCO2A1       | 119.4   | 2.48 | 5.4E-05 | ENSG00000167617 | CDC42EP5      | 286.7  | 2.19 | 2.2E-13 |
| ENSG00000260682 | RN7SKP176     | 151.4   | 2.48 | 5.8E-05 | ENSG00000162782 | TDRD5         | 57.3   | 2.19 | 1.7E-03 |
| ENSG00000174429 | ABRA          | 161.7   | 2.47 | 9.8E-06 | ENSG0000003987  | MTMR7         | 124.7  | 2.19 | 1.3E-09 |
| ENSG00000231443 | AC024937.6    | 16.6    | 2.46 | 8.3E-05 | ENSG00000223764 | RP11-54O7.3   | 103.8  | 2.18 | 8.0E-08 |
| ENSG00000181085 | MAPK15        | 38.1    | 2.45 | 5.1E-08 | ENSG00000235407 | RP11-470L19.2 | 91.6   | 2.18 | 1.7E-03 |
| ENSG00000105251 | SHD           | 2452.2  | 2.45 | 2.1E-06 | ENSG00000169291 | SHE           | 33.3   | 2.17 | 4.5E-04 |
| ENSG00000115705 | TPO           | 58.3    | 2.45 | 3.1E-05 | ENSG00000185522 | LMNTD2        | 178.0  | 2.17 | 2.6E-08 |
| ENSG00000153237 | CCDC148       | 72.4    | 2.45 | 5.8E-09 | ENSG00000087085 | ACHE          | 164.9  | 2.17 | 1.1E-08 |
| ENSG00000166763 | STRCP1        | 11.7    | 2.45 | 2.9E-04 | ENSG00000142606 | MMEL1         | 9.9    | 2.15 | 4.5E-03 |
| ENSG00000165863 | C10orf82      | 20.5    | 2.44 | 2.1E-03 | ENSG00000101180 | HRH3          | 8.9    | 2.15 | 8.3E-03 |
| ENSG00000182511 | FES           | 49.6    | 2.43 | 2.9E-10 | ENSG00000175147 | TMEM51-AS1    | 25.4   | 2.14 | 2.2E-03 |
| ENSG00000139219 | COL2A1        | 16323.8 | 2.42 | 3.5E-03 | ENSG00000124507 | PACSN1        | 360.1  | 2.13 | 3.4E-14 |
| ENSG00000115457 | IGFBP2        | 6773.9  | 2.42 | 1.1E-15 | ENSG00000170091 | HMP19         | 24.6   | 2.13 | 1.3E-04 |
| ENSG00000079101 | CLUL1         | 31.6    | 2.42 | 1.2E-06 | ENSG00000184058 | TBX1          | 41.2   | 2.13 | 2.6E-03 |
| ENSG00000186994 | KANK3         | 24.5    | 2.41 | 2.8E-05 | ENSG00000266714 | MYO15B        | 2356.6 | 2.13 | 9.6E-09 |
| ENSG00000198915 | RASGEF1A      | 7.1     | 2.41 | 2.6E-03 | ENSG00000237940 | AC093642.3    | 21.6   | 2.12 | 3.1E-04 |
| ENSG00000142408 | CACNG8        | 44.8    | 2.41 | 7.7E-07 | ENSG00000240194 | CYMP          | 70.1   | 2.12 | 5.6E-03 |
| ENSG00000117115 | PADI2         | 1895.3  | 2.40 | 1.3E-05 | ENSG00000197467 | COL13A1       | 473.8  | 2.12 | 3.5E-06 |
| ENSG00000125895 | TMEM74B       | 391.3   | 2.39 | 9.5E-08 | ENSG00000066468 | FGFR2         | 553.7  | 2.11 | 1.3E-04 |
| ENSG00000125378 | BMP4          | 243.7   | 2.39 | 5.0E-10 | ENSG00000142621 | FHAD1         | 9.4    | 2.11 | 4.7E-03 |
| ENSG00000232176 | RP11-146N23.1 | 12.7    | 2.39 | 5.3E-04 | ENSG00000095397 | DFNB31        | 537.2  | 2.11 | 1.8E-14 |
| ENSG00000197943 | PLCG2         | 803.4   | 2.39 | 1.2E-06 | ENSG00000105376 | ICAM5         | 843.9  | 2.11 | 7.4E-08 |
| ENSG00000174672 | BRSK2         | 348.6   | 2.39 | 3.0E-16 | ENSG00000214140 | PRCD          | 81.1   | 2.10 | 1.2E-06 |
| ENSG00000105825 | TFPI2         | 419.3   | 2.38 | 3.7E-08 | ENSG00000124429 | POF1B         | 214.4  | 2.09 | 1.2E-05 |
| ENSG00000196668 | LINC00173     | 80.8    | 2.38 | 3.6E-12 | ENSG00000254561 | RP11-196E1.3  | 11.0   | 2.09 | 7.8E-03 |
| ENSG00000144596 | GRIP2         | 45.4    | 2.38 | 2.2E-05 | ENSG00000100024 | UPB1          | 125.9  | 2.09 | 8.5E-05 |
| ENSG00000137204 | SLC22A7       | 22.4    | 2.37 | 1.7E-03 | ENSG00000157693 | C9orf91       | 165.8  | 2.09 | 9.8E-10 |
| ENSG00000128564 | VGF           | 15.2    | 2.37 | 2.5E-03 | ENSG00000085741 | WNT11         | 331.6  | 2.08 | 2.2E-10 |
| ENSG00000141655 | TNFRSF11A     | 46.6    | 2.37 | 2.8E-08 | ENSG00000107623 |               | 84.0   | 2.08 | 2.0E-03 |
| ENSG00000260001 | TGFBR3L       | 51.7    | 2.37 | 8.0E-06 | ENSG00000179915 | NRXN1         | 653.4  | 2.08 | 1.3E-05 |
| ENSG00000260284 | TPSP2         | 10.7    | 2.37 | 1.5E-03 | ENSG00000179111 | HES7          | 101.5  | 2.07 | 1.4E-07 |
| ENSG00000197971 | MBP           | 143.7   | 2.37 | 5.8E-05 | ENSG00000099994 | SUSD2         | 606.2  | 2.07 | 1.6E-16 |
| ENSG00000148798 | INA           | 47.9    | 2.36 | 2.8E-04 | ENSG00000186297 | GABRA5        | 7.0    | 2.07 | 1.1E-02 |
| ENSG00000197471 | SPN           | 77.9    | 2.35 | 1.9E-08 | ENSG00000156299 | TIAM1         | 267.4  | 2.07 | 1.4E-08 |
| ENSG00000255020 | AF131216.5    | 17.8    | 2.35 | 2.7E-05 | ENSG00000261143 | ADAMTS7P3     | 68.0   | 2.07 | 7.7E-05 |
| ENSG00000248309 | MEF2C-AS1     | 12.8    | 2.35 | 2.5E-04 | ENSG00000149926 | FAM57B        | 11.7   | 2.06 | 6.7E-03 |
| ENSG00000253807 | LINC01170     | 24.9    | 2.35 | 3.8E-04 | ENSG00000165868 | HSPA12A       | 249.0  | 2.06 | 1.1E-06 |
| ENSG00000052344 | PRSS8         | 214.0   | 2.35 | 7.4E-08 | ENSG00000244459 | RP11-1398P2.1 | 12.1   | 2.06 | 1.2E-02 |
| ENSG00000074317 | SNCB          | 20.9    | 2.35 | 1.7E-03 | ENSG00000105696 | TMEM59L       | 147.2  | 2.06 | 7.8E-08 |
| ENSG00000160712 | IL6R          | 262.1   | 2.34 | 5.7E-11 | ENSG00000168993 | CPLX1         | 14.7   | 2.06 | 9.2E-03 |
| ENSG00000090539 | CHRD          | 23.7    | 2.34 | 1.8E-05 | ENSG00000229759 | MRPS18AP1     | 9.3    | 2.06 | 1.2E-02 |
| ENSG00000110675 | ELMOD1        | 21.0    | 2.33 | 3.7E-05 | ENSG00000112812 | PRSS16        | 32.2   | 2.05 | 2.9E-04 |
| ENSG00000170049 | KCNAB3        | 156.4   | 2.33 | 3.1E-10 | ENSG00000181408 | UTS2R         | 9.3    | 2.05 | 1.7E-02 |
| ENSG00000225968 | ELFN1         | 655.7   | 2.33 | 3.6E-07 | ENSG00000204928 | GRXCR2        | 7.1    | 2.05 | 1.9E-02 |
| ENSG00000134853 | PDGFRA        | 841.2   | 2.32 | 2.4E-07 | ENSG00000127585 | FBXL16        | 56.6   | 2.05 | 2.1E-04 |
| ENSG00000101204 | CHRNA4        | 8.2     | 2.31 | 6.9E-03 | ENSG00000109832 | DDX25         | 12.8   | 2.05 | 1.3E-03 |
| ENSG00000134594 | RAB33A        | 196.9   | 2.31 | 6.5E-10 | ENSG00000105639 | JAK3          | 84.9   | 2.05 | 4.3E-06 |
| ENSG00000260432 |               | 6.8     | 2.31 | 4.3E-03 | ENSG00000269113 | TRABD2B       | 218.3  | 2.04 | 2.7E-05 |
| ENSG00000181031 | RPH3AL        | 83.2    | 2.30 | 2.5E-05 | ENSG00000169918 | OTUD7A        | 12.8   | 2.04 | 4.9E-03 |
| ENSG00000017373 |               | 235.9   | 2.30 | 1.4E-13 | ENSG00000177989 | ODF3B         | 52.2   | 2.04 | 5.5E-07 |
| ENSG00000196358 | NTNG2         | 160.6   | 2.30 | 4.1E-07 | ENSG00000254154 | RP4-798P15.3  | 11.1   | 2.04 | 2.7E-03 |
| ENSG00000103175 | WFDC1         | 14.5    | 2.29 | 4.2E-04 | ENSG00000228923 | AP000355.2    | 7.8    | 2.04 | 1.9E-02 |
| ENSG00000163235 | TGFA          | 159.0   | 2.29 | 7.4E-03 | ENSG00000178038 | ALS2CL        | 561.1  | 2.03 | 3.5E-09 |
| ENSG00000134317 | GRHL1         | 44.5    | 2.28 | 8.1E-06 | ENSG00000227184 |               | 149.2  | 2.03 | 2.2E-16 |
| ENSG00000164076 | CAMKV         | 7.4     | 2.28 | 8.3E-03 | ENSG00000119547 | ONECUT2       | 20.6   | 2.03 | 5.3E-03 |
| ENSG00000102109 | PCSK1N        | 588.5   | 2.27 | 1.6E-07 | ENSG00000145358 | DDIT4L        | 281.4  | 2.02 | 7.8E-04 |
| ENSG00000131459 | GFPT2         | 163.6   | 2.26 | 3.7E-14 | ENSG00000261183 | RP11-532F12.5 | 33.1   | 2.02 | 2.2E-03 |

|                 |               |          |      |         |                 |              |        |      |         |
|-----------------|---------------|----------|------|---------|-----------------|--------------|--------|------|---------|
| ENSG00000269028 | MTRNR2L12     | 61.9     | 2.01 | 1.9E-04 | ENSG00000231663 | RP5-827C21.4 | 30.7   | 1.84 | 5.1E-05 |
| ENSG00000197616 | MYH6          | 243348.1 | 2.01 | 1.7E-02 | ENSG00000229344 | RP5-857K21.7 | 54.6   | 1.84 | 3.9E-04 |
| ENSG00000157214 | STEAP2        | 664.3    | 2.01 | 1.1E-06 | ENSG00000119283 | TRIM67       | 11.2   | 1.84 | 1.2E-02 |
| ENSG00000271387 | RP11-382D12.2 | 9.1      | 2.01 | 7.3E-03 | ENSG00000205517 | RGL3         | 20.7   | 1.83 | 1.4E-03 |
| ENSG00000081479 | LRP2          | 188.9    | 2.01 | 1.3E-03 | ENSG00000040608 | RTN4R        | 132.4  | 1.83 | 1.7E-05 |
| ENSG00000087250 | MT3           | 255.2    | 2.00 | 3.3E-03 | ENSG00000185551 | NR2F2        | 3152.9 | 1.83 | 2.5E-04 |
| ENSG00000196557 | CACNA1H       | 926.6    | 2.00 | 4.2E-08 | ENSG00000102934 | PLLP         | 24.0   | 1.83 | 3.3E-03 |
| ENSG00000137936 | BCAR3         | 166.2    | 2.00 | 1.2E-06 | ENSG00000156535 | CD109        | 1746.0 | 1.83 | 1.8E-05 |
| ENSG00000151025 | GPRI158       | 69.0     | 1.99 | 4.4E-05 | ENSG00000264329 | MIR3911      | 13.8   | 1.83 | 4.1E-03 |
| ENSG00000260807 | RP11-161M6.2  | 396.7    | 1.99 | 1.9E-06 | ENSG00000163462 | TRIM46       | 36.4   | 1.83 | 8.0E-04 |
| ENSG00000109472 | CPE           | 2305.6   | 1.99 | 1.6E-10 | ENSG00000050767 | COL23A1      | 1632.8 | 1.82 | 1.1E-05 |
| ENSG00000100604 | CHGA          | 16.7     | 1.99 | 2.0E-02 | ENSG00000100842 | EFS          | 314.5  | 1.82 | 1.3E-10 |
| ENSG00000185924 | RTN4RL1       | 270.7    | 1.98 | 4.6E-07 | ENSG00000116661 | FBXO2        | 194.1  | 1.82 | 4.9E-10 |
| ENSG00000130649 | CYP2E1        | 183.7    | 1.98 | 4.5E-09 | ENSG00000155760 | FZD7         | 738.7  | 1.82 | 5.1E-05 |
| ENSG00000083067 | TRPM3         | 36.9     | 1.98 | 2.9E-05 | ENSG00000105792 | CFAP69       | 122.7  | 1.81 | 2.0E-06 |
| ENSG00000138670 | RASGEF1B      | 159.4    | 1.98 | 4.2E-08 | ENSG00000005059 | CCDC109B     | 21.0   | 1.81 | 4.9E-03 |
| ENSG00000185988 | PLK5          | 13.3     | 1.97 | 3.6E-03 | ENSG00000105991 | HOXA1        | 25.4   | 1.81 | 3.7E-03 |
| ENSG00000236714 | AC005592.1    | 159.3    | 1.97 | 4.3E-03 | ENSG00000271086 | NAMA         | 6.9    | 1.81 | 2.3E-02 |
| ENSG00000167525 | PROCA1        | 256.1    | 1.97 | 6.0E-07 | ENSG00000186715 | MST1L        | 23.9   | 1.81 | 3.1E-04 |
| ENSG00000214290 | COLCA2        | 23.1     | 1.96 | 2.0E-03 | ENSG00000178222 | RNF212       | 60.2   | 1.81 | 2.0E-05 |
| ENSG00000142235 | LMTK3         | 153.4    | 1.96 | 4.3E-08 | ENSG00000109610 | SOD3         | 688.5  | 1.81 | 2.7E-05 |
| ENSG00000114638 | UPK1B         | 107.4    | 1.96 | 9.8E-06 | ENSG00000176692 | FOXC2        | 23.3   | 1.81 | 1.7E-02 |
| ENSG00000068831 | RASGRP2       | 584.8    | 1.96 | 3.5E-12 | ENSG00000163873 | GRIK3        | 8.0    | 1.81 | 4.4E-02 |
| ENSG00000188993 | LRRC66        | 23.9     | 1.96 | 1.5E-03 | ENSG00000134253 | TRIM45       | 411.9  | 1.81 | 1.4E-08 |
| ENSG00000101282 | RSP04         | 19.2     | 1.96 | 1.7E-03 | ENSG00000105278 | ZFR2         | 26.6   | 1.80 | 1.2E-04 |
| ENSG00000186326 | RGS9BP        | 39.8     | 1.95 | 2.8E-06 | ENSG00000126217 | MCF2L        | 715.4  | 1.80 | 2.7E-08 |
| ENSG00000225889 | AC074289.1    | 9.8      | 1.94 | 5.8E-03 | ENSG00000101096 | NFATC2       | 658.3  | 1.80 | 5.3E-10 |
| ENSG00000196155 | PLEKHG4       | 61.2     | 1.94 | 1.7E-08 | ENSG00000258947 | TUBB3        | 22.2   | 1.80 | 1.4E-03 |
| ENSG00000230006 | ANKRD36BP2    | 9.8      | 1.94 | 4.9E-03 | ENSG00000183615 | FAM167B      | 28.3   | 1.80 | 1.0E-04 |
| ENSG00000176678 | FOXL1         | 17.7     | 1.94 | 7.6E-03 | ENSG00000167964 | RAB26        | 168.5  | 1.80 | 5.4E-07 |
| ENSG00000178162 | FAR2P2        | 39.7     | 1.93 | 4.8E-04 | ENSG00000188672 | RHCE         | 14.9   | 1.79 | 3.8E-03 |
| ENSG00000100968 | NFATC4        | 1120.0   | 1.93 | 8.3E-10 | ENSG00000141639 | MAPK4        | 1169.8 | 1.79 | 5.4E-05 |
| ENSG00000181652 | ATG9B         | 344.9    | 1.93 | 4.3E-03 | ENSG00000186301 | MST1P2       | 27.8   | 1.79 | 1.7E-04 |
| ENSG00000253304 | TMEM200B      | 52.8     | 1.93 | 3.8E-03 | ENSG00000170545 | SMAGP        | 27.3   | 1.78 | 8.5E-05 |
| ENSG00000074047 | GLI2          | 148.8    | 1.93 | 7.9E-11 | ENSG00000167680 | SEMA6B       | 512.8  | 1.78 | 3.7E-12 |
| ENSG00000205786 | LINC01531     | 113.9    | 1.92 | 3.8E-03 | ENSG00000162989 | KCNJ3        | 965.8  | 1.78 | 2.3E-04 |
| ENSG00000183837 | PNMA3         | 71.1     | 1.92 | 1.2E-03 | ENSG00000126583 | PRKCG        | 12.9   | 1.78 | 5.3E-03 |
| ENSG00000198590 | C3orf35       | 37.6     | 1.92 | 8.5E-05 | ENSG00000164588 | HCN1         | 240.9  | 1.78 | 1.9E-06 |
| ENSG00000101197 | BIRC7         | 16.0     | 1.92 | 1.9E-02 | ENSG00000141404 | GNAL         | 1117.1 | 1.78 | 4.2E-02 |
| ENSG00000164199 | ADGRV1        | 101.4    | 1.92 | 1.4E-03 | ENSG00000133808 | MICALCL      | 51.5   | 1.77 | 1.4E-05 |
| ENSG00000159409 | CELF3         | 12.6     | 1.91 | 1.9E-02 | ENSG00000160111 | CPAMD8       | 113.6  | 1.77 | 2.4E-05 |
| ENSG00000122035 | RASL11A       | 115.6    | 1.91 | 2.0E-06 | ENSG00000166979 | EVA1C        | 51.6   | 1.77 | 4.7E-03 |
| ENSG00000106948 | AKNA          | 563.5    | 1.91 | 8.0E-10 | ENSG00000087258 | GNAO1        | 977.1  | 1.77 | 1.2E-03 |
| ENSG00000166002 | SMCO4         | 296.8    | 1.91 | 1.2E-08 | ENSG00000210100 | MT-TI        | 69.7   | 1.76 | 1.3E-03 |
| ENSG00000116254 | CHD5          | 13.7     | 1.90 | 6.3E-03 | ENSG00000215529 | EFCAB8       | 7.2    | 1.76 | 4.9E-02 |
| ENSG00000185818 | NAT8L         | 605.5    | 1.90 | 1.3E-11 | ENSG00000198719 | DLL1         | 74.8   | 1.76 | 2.1E-03 |
| ENSG00000198547 | C20orf203     | 41.1     | 1.90 | 1.4E-03 | ENSG00000168350 | DEGS2        | 31.2   | 1.76 | 3.5E-02 |
| ENSG00000128683 | GAD1          | 76.7     | 1.89 | 4.6E-03 | ENSG00000162998 | FRZB         | 282.3  | 1.76 | 1.5E-08 |
| ENSG00000182912 | TSPEAR-AS2    | 166.2    | 1.89 | 4.4E-05 | ENSG00000214279 | SCART1       | 203.8  | 1.75 | 7.1E-09 |
| ENSG00000007402 | CACNA2D2      | 1198.3   | 1.89 | 9.5E-04 | ENSG00000126259 | KIRREL2      | 10.9   | 1.75 | 1.6E-02 |
| ENSG00000170382 | LRRN2         | 234.2    | 1.88 | 1.8E-03 | ENSG00000215018 | COL28A1      | 28.5   | 1.75 | 1.4E-03 |
| ENSG00000127561 | SYNGR3        | 340.8    | 1.88 | 5.6E-08 | ENSG00000007001 | UPP2         | 7.2    | 1.74 | 4.9E-02 |
| ENSG00000113231 | PDE8B         | 644.6    | 1.88 | 2.9E-04 | ENSG00000230970 | HHATL-AS1    | 14.2   | 1.74 | 6.7E-03 |
| ENSG00000242866 | STRC          | 13.5     | 1.88 | 1.5E-02 | ENSG00000142609 | CFAP74       | 16.2   | 1.74 | 1.8E-02 |
| ENSG00000105717 | PBX4          | 29.9     | 1.88 | 2.4E-04 | ENSG00000249626 | RP11-496H1.1 | 16.0   | 1.73 | 1.0E-02 |
| ENSG00000182230 | FAM153B       | 196.6    | 1.88 | 2.4E-03 | ENSG00000156886 | ITGAD        | 18.6   | 1.73 | 1.3E-02 |
| ENSG00000125510 | OPRL1         | 102.2    | 1.87 | 3.6E-05 | ENSG00000143994 | ABHD1        | 21.0   | 1.73 | 6.7E-03 |
| ENSG00000104848 | KCNA7         | 21.2     | 1.87 | 5.7E-03 | ENSG00000182472 | CAPN12       | 47.6   | 1.73 | 2.3E-03 |
| ENSG00000180447 | GAS1          | 481.2    | 1.87 | 2.6E-03 | ENSG00000188522 | FAM83G       | 93.3   | 1.72 | 1.1E-04 |
| ENSG00000142634 | EFHD2         | 677.2    | 1.87 | 8.1E-05 | ENSG00000155974 | GRIPI        | 277.1  | 1.72 | 2.1E-07 |
| ENSG00000163536 | SERPINI1      | 1392.2   | 1.87 | 1.8E-05 | ENSG00000179023 | KLHDC7A      | 8.6    | 1.71 | 4.2E-02 |
| ENSG00000010282 | HHATL         | 5122.9   | 1.87 | 3.3E-10 | ENSG00000074966 | TXK          | 15.1   | 1.71 | 5.3E-03 |
| ENSG00000105255 | FSD1          | 53.9     | 1.86 | 1.5E-04 | ENSG00000183508 | FAM46C       | 63.6   | 1.71 | 6.0E-03 |
| ENSG00000159248 | GJD2          | 33.8     | 1.86 | 1.3E-02 | ENSG00000092529 | CAPN3        | 257.9  | 1.71 | 8.6E-06 |
| ENSG00000232237 | ASCL5         | 8.1      | 1.85 | 1.7E-02 | ENSG00000223756 | TSSC2        | 34.0   | 1.70 | 2.0E-04 |
| ENSG00000185669 | SNAI3         | 67.3     | 1.85 | 1.3E-05 | ENSG00000204018 |              | 168.1  | 1.70 | 4.6E-03 |
| ENSG00000183421 | RIPK4         | 77.5     | 1.85 | 6.6E-05 | ENSG00000177108 | ZDHHC22      | 23.3   | 1.70 | 1.3E-02 |
| ENSG00000178718 | RPP25         | 138.6    | 1.85 | 1.1E-06 | ENSG00000257556 | RP11-44N21.1 | 33.2   | 1.70 | 3.7E-04 |
| ENSG00000271952 | RP11-245G13.2 | 36.5     | 1.85 | 9.3E-03 | ENSG00000204442 | FAM155A      | 175.2  | 1.70 | 2.7E-05 |
| ENSG00000148600 | CDHR1         | 42.6     | 1.85 | 2.7E-05 | ENSG00000182389 | CACNB4       | 21.3   | 1.69 | 1.5E-02 |
| ENSG00000107968 | MAP3K8        | 71.7     | 1.84 | 1.9E-07 | ENSG00000073737 | DHRS9        | 170.7  | 1.69 | 1.6E-02 |
| ENSG00000131242 | RAB11FIP4     | 101.0    | 1.84 | 2.5E-04 | ENSG00000203301 |              | 6.8    | 1.69 | 3.2E-02 |

|                 |                |        |      |         |                 |               |        |      |         |
|-----------------|----------------|--------|------|---------|-----------------|---------------|--------|------|---------|
| ENSG00000161270 | NPHS1          | 99.4   | 1.69 | 5.1E-05 | ENSG00000229727 | AC013460.1    | 11.2   | 1.58 | 4.2E-02 |
| ENSG00000155511 | GRIA1          | 19.5   | 1.69 | 3.8E-02 | ENSG00000159214 | CCDC24        | 192.5  | 1.58 | 3.7E-09 |
| ENSG00000124602 | UNC5CL         | 173.7  | 1.69 | 1.3E-06 | ENSG00000250511 | RP11-380D23.1 | 13.5   | 1.58 | 3.7E-02 |
| ENSG00000095383 | TBC1D2         | 64.7   | 1.69 | 5.8E-06 | ENSG00000259895 | RP11-715J22.2 | 18.1   | 1.58 | 1.5E-02 |
| ENSG00000198753 | PLXNB3         | 402.1  | 1.69 | 4.0E-05 | ENSG00000116852 | KIF21B        | 79.3   | 1.58 | 2.1E-03 |
| ENSG00000179008 | C14orf39       | 14.0   | 1.68 | 1.1E-02 | ENSG00000269935 | RP11-482M8.3  | 10.8   | 1.57 | 4.1E-02 |
| ENSG00000161328 | LRRC56         | 80.4   | 1.68 | 5.0E-04 | ENSG00000060718 | COL11A1       | 1846.0 | 1.57 | 1.1E-02 |
| ENSG00000184925 | LCN12          | 466.9  | 1.68 | 8.4E-05 | ENSG00000111775 | COX6A1        | 621.4  | 1.57 | 1.1E-04 |
| ENSG00000103723 | AP3B2          | 7.6    | 1.68 | 4.3E-02 | ENSG00000185567 | AHNAK2        | 1767.5 | 1.57 | 1.4E-03 |
| ENSG00000237429 | RP1-159A19.4   | 27.9   | 1.68 | 2.6E-03 | ENSG00000104814 | MAP4K1        | 10.8   | 1.57 | 2.7E-02 |
| ENSG00000130653 | PNPLA7         | 301.1  | 1.68 | 4.3E-06 | ENSG00000166823 | MESPI         | 86.6   | 1.57 | 1.9E-02 |
| ENSG00000170412 | GPRC5C         | 358.1  | 1.68 | 2.9E-08 | ENSG00000132702 | HAPLN2        | 46.6   | 1.57 | 2.3E-04 |
| ENSG00000164659 | KIAA1324L      | 1266.1 | 1.67 | 7.3E-06 | ENSG00000214595 | EML6          | 46.3   | 1.57 | 9.3E-04 |
| ENSG00000117245 | KIF17          | 13.9   | 1.67 | 1.3E-02 | ENSG00000091536 | MYO15A        | 69.5   | 1.57 | 1.2E-03 |
| ENSG00000169783 | LINGO1         | 434.5  | 1.67 | 1.4E-06 | ENSG00000251429 | RP11-597D13.7 | 25.6   | 1.56 | 1.2E-02 |
| ENSG00000196126 | HLA-DRB1       | 34.7   | 1.67 | 3.2E-03 | ENSG00000188677 | PARVB         | 267.4  | 1.56 | 1.8E-05 |
| ENSG00000196189 | SEMA4A         | 243.0  | 1.67 | 6.0E-08 | ENSG00000243811 | APOBEC3D      | 25.1   | 1.56 | 1.4E-02 |
| ENSG00000108370 | RGS9           | 60.3   | 1.67 | 1.7E-03 | ENSG00000210191 | MT-TL2        | 268.2  | 1.56 | 4.3E-03 |
| ENSG00000130208 | APOC1          | 16.7   | 1.67 | 3.6E-02 | ENSG00000140465 | CYP1A1        | 59.8   | 1.56 | 5.2E-04 |
| ENSG00000199038 | MIR210         | 24.7   | 1.67 | 4.0E-03 | ENSG00000236830 | CBR3-AS1      | 15.8   | 1.56 | 4.6E-02 |
| ENSG00000100351 | GRAP2          | 7.2    | 1.66 | 4.0E-02 | ENSG00000105976 | MET           | 440.2  | 1.56 | 5.2E-04 |
| ENSG00000245213 | RP11-10K16.1   | 7.5    | 1.66 | 4.3E-02 | ENSG00000261377 | PDCD6IPP2     | 13.1   | 1.55 | 1.5E-02 |
| ENSG00000142347 | MYO1F          | 21.4   | 1.66 | 8.8E-03 | ENSG00000157851 | DPYSL5        | 338.5  | 1.55 | 1.3E-08 |
| ENSG00000143590 | EFNA3          | 132.0  | 1.66 | 8.6E-06 | ENSG00000089820 | ARHGAP4       | 496.3  | 1.55 | 3.9E-04 |
| ENSG00000235326 |                | 12.2   | 1.66 | 2.5E-02 | ENSG00000167311 | ART5          | 41.4   | 1.55 | 7.1E-04 |
| ENSG00000163932 | PRKCD          | 335.9  | 1.66 | 1.2E-05 | ENSG00000061938 | TNK2          | 3786.7 | 1.55 | 5.0E-25 |
| ENSG00000231305 | RP11-723O4.2   | 12.1   | 1.66 | 2.5E-02 | ENSG00000157617 | C2CD2         | 203.3  | 1.55 | 2.8E-06 |
| ENSG00000117480 | FAAH           | 398.7  | 1.66 | 3.2E-11 | ENSG00000134222 | PSRC1         | 190.3  | 1.55 | 3.7E-07 |
| ENSG00000170893 | TRH            | 827.5  | 1.65 | 1.2E-02 | ENSG00000176658 | MYO1D         | 1053.7 | 1.55 | 6.9E-07 |
| ENSG00000223573 | TINCR          | 25.7   | 1.65 | 1.3E-02 | ENSG00000225213 | RP11-197M22.2 | 7.9    | 1.55 | 4.5E-02 |
| ENSG00000088726 | TMEM40         | 156.6  | 1.65 | 3.1E-05 | ENSG00000046889 | PREX2         | 11.2   | 1.55 | 1.9E-02 |
| ENSG00000187634 | SAMD11         | 92.9   | 1.64 | 7.1E-03 | ENSG00000109771 | LRP2BP        | 194.3  | 1.55 | 4.8E-05 |
| ENSG00000270087 | RP11-399K21.11 | 14.2   | 1.64 | 2.7E-02 | ENSG00000025708 | TYMP          | 40.6   | 1.54 | 1.7E-04 |
| ENSG00000162975 | KCNF1          | 20.1   | 1.64 | 2.3E-02 | ENSG00000143127 | ITGA10        | 1099.5 | 1.54 | 4.0E-06 |
| ENSG00000174514 | MFSD4          | 75.5   | 1.63 | 9.2E-04 | ENSG00000136002 | ARHGEF4       | 178.1  | 1.53 | 2.8E-05 |
| ENSG00000003989 | SLC7A2         | 1635.6 | 1.63 | 3.1E-10 | ENSG00000115257 | PCSK4         | 211.9  | 1.53 | 4.3E-06 |
| ENSG00000261693 | RP13-467H17.1  | 11.4   | 1.63 | 2.3E-02 | ENSG00000056736 | IL17RB        | 469.9  | 1.53 | 2.2E-05 |
| ENSG00000237886 | LINC01573      | 145.1  | 1.62 | 8.1E-10 | ENSG00000144331 | ZNF385B       | 1397.2 | 1.53 | 1.5E-03 |
| ENSG00000163354 | DCST2          | 67.3   | 1.62 | 6.8E-06 | ENSG00000135596 | MICAL1        | 225.1  | 1.53 | 3.5E-04 |
| ENSG00000245532 | NEAT1          | 9824.8 | 1.62 | 2.7E-06 | ENSG00000179296 |               | 17.0   | 1.53 | 6.8E-03 |
| ENSG00000157782 | CABP1          | 9.6    | 1.62 | 4.3E-02 | ENSG00000180999 | C1orf105      | 742.2  | 1.53 | 1.4E-03 |
| ENSG00000133433 | GSTT2B         | 14.7   | 1.62 | 2.3E-02 | ENSG00000175352 | NRIP3         | 52.9   | 1.53 | 1.7E-03 |
| ENSG00000133083 | DCLK1          | 190.1  | 1.62 | 1.5E-03 | ENSG00000233585 | AC115617.2    | 11.0   | 1.53 | 2.4E-02 |
| ENSG00000187554 | TLR5           | 63.0   | 1.62 | 2.5E-03 | ENSG00000141744 | PNMT          | 268.9  | 1.53 | 8.9E-06 |
| ENSG00000232224 | LINC00202-1    | 104.0  | 1.62 | 1.1E-03 | ENSG00000114859 | CLCN2         | 240.7  | 1.53 | 3.9E-06 |
| ENSG00000237187 | NR2F1-AS1      | 27.7   | 1.62 | 1.2E-02 | ENSG00000012779 | ALOX5         | 30.0   | 1.53 | 3.5E-02 |
| ENSG00000166473 | PKD1L2         | 315.3  | 1.61 | 1.5E-04 | ENSG00000138821 | SLC39A8       | 610.9  | 1.52 | 2.6E-05 |
| ENSG00000149243 | KLHL35         | 26.6   | 1.61 | 7.6E-04 | ENSG00000243225 | RP11-7F17.1   | 27.0   | 1.52 | 1.2E-02 |
| ENSG00000187772 | LIN28B         | 18.4   | 1.61 | 7.2E-03 | ENSG00000239677 | PDZRN3-AS1    | 49.8   | 1.52 | 3.3E-02 |
| ENSG00000166450 | PRTG           | 140.3  | 1.61 | 2.7E-03 | ENSG00000149922 | TBX6          | 28.4   | 1.52 | 6.1E-03 |
| ENSG00000140939 | NOL3           | 1679.4 | 1.61 | 6.0E-05 | ENSG00000073670 | ADAM11        | 7862.5 | 1.52 | 7.5E-05 |
| ENSG00000270906 | RP11-475J5.6   | 39.9   | 1.61 | 1.3E-02 | ENSG00000072952 | MRV11         | 193.8  | 1.52 | 1.8E-02 |
| ENSG00000254206 | NPIPB11        | 19.7   | 1.60 | 8.9E-03 | ENSG00000213443 | RP11-75L1.2   | 104.5  | 1.52 | 3.8E-03 |
| ENSG00000161544 | CYGB           | 151.9  | 1.60 | 3.8E-05 | ENSG00000111729 | CLEC4A        | 20.1   | 1.52 | 5.8E-03 |
| ENSG00000215039 | CD27-AS1       | 876.1  | 1.60 | 1.4E-13 | ENSG00000171219 | CDC42BPG      | 297.2  | 1.52 | 5.3E-07 |
| ENSG00000129667 | RHBDF2         | 60.2   | 1.60 | 1.1E-03 | ENSG00000006453 | BAIAP2L1      | 135.5  | 1.52 | 5.8E-04 |
| ENSG00000130762 | ARHGEF16       | 90.4   | 1.59 | 2.2E-04 | ENSG00000164604 | GPR85         | 94.1   | 1.52 | 1.0E-03 |
| ENSG00000116544 | DLGAP3         | 7.6    | 1.59 | 4.1E-02 | ENSG00000204314 | PRRT1         | 76.2   | 1.52 | 1.1E-06 |
| ENSG00000136883 | KIF12          | 20.9   | 1.59 | 2.3E-02 | ENSG00000247809 | NR2F2-AS1     | 76.9   | 1.52 | 9.6E-03 |
| ENSG00000204241 | RP11-713P17.3  | 36.6   | 1.59 | 6.7E-04 | ENSG00000068903 | SIRT2         | 809.7  | 1.52 | 8.0E-04 |
| ENSG00000225882 | LINC01456      | 21.1   | 1.59 | 6.7E-03 | ENSG00000185664 | PMEL          | 209.5  | 1.51 | 1.2E-02 |
| ENSG00000248527 | MTATP6P1       | 59.9   | 1.59 | 6.2E-03 | ENSG00000018625 | ATPIA2        | 1932.5 | 1.51 | 7.9E-04 |
| ENSG00000225783 | MIAT           | 21.7   | 1.59 | 2.2E-02 | ENSG00000118369 | USP35         | 578.7  | 1.51 | 2.7E-08 |
| ENSG00000198203 | SULT1C2        | 8.8    | 1.59 | 3.6E-02 | ENSG00000123095 | BHLHE41       | 664.4  | 1.51 | 4.2E-04 |
| ENSG00000246982 | RP1-179N16.6   | 45.9   | 1.59 | 5.8E-05 | ENSG00000187699 | C2orf88       | 260.8  | 1.51 | 3.9E-03 |
| ENSG00000170616 |                | 15.0   | 1.59 | 8.1E-03 | ENSG00000260196 | RP1-239B22.5  | 90.3   | 1.51 | 2.8E-03 |
| ENSG00000230537 | RP11-305L7.1   | 14.7   | 1.59 | 1.4E-02 | ENSG00000177685 | CRACR2B       | 765.4  | 1.50 | 2.1E-03 |
| ENSG00000210184 | MT-TS2         | 153.9  | 1.58 | 3.8E-03 | ENSG00000139625 | MAP3K12       | 582.7  | 1.50 | 4.1E-10 |
| ENSG00000259344 |                | 39.0   | 1.58 | 7.1E-03 | ENSG00000248603 |               | 111.9  | 1.50 | 1.2E-06 |
| ENSG00000271858 | CYB561D2       | 16.1   | 1.58 | 6.1E-03 | ENSG00000185615 | PDIA2         | 25.7   | 1.50 | 4.3E-02 |
| ENSG00000113361 | CDH6           | 44.2   | 1.58 | 2.5E-02 | ENSG00000091622 | PITPNM3       | 282.9  | 1.50 | 1.8E-02 |
| ENSG00000228376 | GAS2L1P2       | 24.8   | 1.58 | 9.3E-03 | ENSG00000187164 | SHTN1         | 160.1  | 1.50 | 5.4E-04 |

|                 |               |         |      |         |                 |                |         |      |         |
|-----------------|---------------|---------|------|---------|-----------------|----------------|---------|------|---------|
| ENSG00000163931 | TKT           | 1597.9  | 1.50 | 5.3E-07 | ENSG00000196547 | MAN2A2         | 5068.8  | 1.41 | 1.9E-07 |
| ENSG00000139194 | RBP5          | 31.1    | 1.50 | 3.7E-03 | ENSG00000137101 | CD72           | 18.5    | 1.41 | 2.7E-02 |
| ENSG00000110900 | TSPAN11       | 285.2   | 1.50 | 1.3E-05 | ENSG00000196104 | SPOCK3         | 48.1    | 1.41 | 1.3E-02 |
| ENSG00000210112 | MT-TR         | 23.5    | 1.50 | 7.8E-03 | ENSG00000056558 | TRAF1          | 345.5   | 1.41 | 1.7E-05 |
| ENSG00000255458 | RP11-539G18.3 | 15.6    | 1.50 | 2.1E-02 | ENSG00000196739 | COL27A1        | 1455.0  | 1.41 | 1.6E-12 |
| ENSG00000146122 | DAAM2         | 247.4   | 1.49 | 1.9E-08 | ENSG00000196586 | MYO6           | 833.6   | 1.41 | 1.1E-05 |
| ENSG00000031544 |               | 25.5    | 1.49 | 1.4E-02 | ENSG00000168907 | PLA2G4F        | 76.1    | 1.41 | 3.5E-03 |
| ENSG00000141756 | FKBP10        | 2879.1  | 1.49 | 8.8E-09 | ENSG00000228109 | MF12-AS1       | 100.7   | 1.41 | 3.0E-04 |
| ENSG00000210174 | MT-TR         | 111.9   | 1.49 | 1.7E-02 | ENSG00000239713 | APOBEC3G       | 45.2    | 1.41 | 3.9E-02 |
| ENSG00000105464 | GRIN2D        | 72.7    | 1.49 | 3.7E-04 | ENSG00000170011 | MYRIP          | 67.5    | 1.41 | 1.1E-02 |
| ENSG00000006047 | YBX2          | 574.7   | 1.49 | 5.8E-06 | ENSG00000185128 |                | 33.7    | 1.41 | 5.3E-03 |
| ENSG00000064547 | LPAR2         | 161.7   | 1.48 | 8.9E-06 | ENSG00000236255 | AC009404.2     | 24.3    | 1.40 | 9.6E-03 |
| ENSG00000120729 | MYOT          | 76.0    | 1.48 | 1.2E-02 | ENSG00000175449 | RFESD          | 40.9    | 1.40 | 2.0E-03 |
| ENSG00000258461 | RP11-164J13.1 | 198.3   | 1.48 | 1.9E-05 | ENSG00000120149 | MSX2           | 58.0    | 1.40 | 8.1E-03 |
| ENSG00000185482 | STAC3         | 29.0    | 1.48 | 4.7E-03 | ENSG00000230453 | ANKRD18B       | 50.0    | 1.40 | 1.1E-02 |
| ENSG00000249421 | ADAMTS19-AS1  | 30.6    | 1.48 | 1.5E-02 | ENSG00000267355 | RPL9P29        | 16.9    | 1.40 | 3.5E-02 |
| ENSG00000174945 | AMZ1          | 39.2    | 1.48 | 1.0E-02 | ENSG00000140181 |                | 1073.5  | 1.40 | 2.8E-07 |
| ENSG00000106976 | DNM1          | 482.4   | 1.48 | 3.4E-06 | ENSG00000134508 | CABLES1        | 70.4    | 1.40 | 3.6E-05 |
| ENSG00000225630 | MTND2P28      | 61.5    | 1.47 | 1.7E-02 | ENSG00000241288 | RP11-379B18.5  | 29.0    | 1.40 | 1.5E-02 |
| ENSG00000214456 | PLIN5         | 287.3   | 1.47 | 8.2E-03 | ENSG00000017621 |                | 70.7    | 1.40 | 8.9E-04 |
| ENSG00000272223 | RP1-20C7.6    | 17.5    | 1.47 | 2.3E-02 | ENSG00000260077 | RP11-254F7.2   | 105.2   | 1.40 | 2.3E-05 |
| ENSG00000197457 | STMN3         | 81.0    | 1.47 | 1.3E-02 | ENSG00000141068 | KSR1           | 650.6   | 1.40 | 5.7E-05 |
| ENSG00000135519 | KCNH3         | 39.3    | 1.47 | 8.9E-03 | ENSG00000260394 | LA16c-313D11.9 | 16.5    | 1.39 | 3.1E-02 |
| ENSG00000059804 | SLC2A3        | 4446.5  | 1.47 | 2.2E-03 | ENSG00000243230 | RP11-286H14.8  | 26.1    | 1.39 | 2.1E-02 |
| ENSG00000265487 | RP11-793A3.1  | 13.8    | 1.47 | 2.4E-02 | ENSG00000047634 | SCML1          | 315.0   | 1.39 | 1.4E-05 |
| ENSG00000240875 | LINC00886     | 15.7    | 1.47 | 1.4E-02 | ENSG00000005513 | SOX8           | 49.3    | 1.39 | 3.1E-03 |
| ENSG00000235706 | DICER1-AS1    | 188.4   | 1.47 | 3.4E-07 | ENSG00000186231 | KLHL32         | 40.4    | 1.39 | 1.4E-02 |
| ENSG00000210077 | MT-TV         | 32.3    | 1.46 | 8.2E-03 | ENSG00000002587 | HS3ST1         | 16.2    | 1.39 | 3.7E-02 |
| ENSG00000196660 | SLC30A10      | 13.3    | 1.46 | 4.4E-02 | ENSG00000225177 | RP11-390P2.4   | 18.1    | 1.39 | 2.2E-02 |
| ENSG00000064687 | ABCA7         | 1544.2  | 1.46 | 1.6E-06 | ENSG00000147010 | SH3KBP1        | 1124.0  | 1.39 | 2.8E-08 |
| ENSG00000089847 | ANKRD24       | 33.5    | 1.46 | 3.7E-03 | ENSG00000197355 | UAP1L1         | 1384.0  | 1.38 | 3.4E-04 |
| ENSG00000162407 | PPAP2B        | 1275.1  | 1.46 | 8.3E-05 | ENSG00000197558 | SSPO           | 379.3   | 1.38 | 2.6E-05 |
| ENSG00000151012 | SLC7A11       | 75.3    | 1.46 | 8.4E-05 | ENSG00000101638 | ST8SIA5        | 170.6   | 1.38 | 5.0E-03 |
| ENSG00000157833 | GAREML        | 61.0    | 1.46 | 1.4E-02 | ENSG00000179532 | DNHD1          | 579.2   | 1.38 | 2.1E-09 |
| ENSG00000072182 | ASIC4         | 34.3    | 1.46 | 4.7E-03 | ENSG00000092295 | TGM1           | 35.5    | 1.38 | 3.0E-03 |
| ENSG00000184985 | SORCS2        | 635.1   | 1.46 | 9.7E-06 | ENSG00000159640 | ACE            | 98.5    | 1.38 | 1.3E-03 |
| ENSG00000197181 | PIWIL2        | 12.7    | 1.46 | 4.6E-02 | ENSG00000167654 | ATCAY          | 35.6    | 1.38 | 2.9E-03 |
| ENSG00000072858 | SIDT1         | 12.6    | 1.45 | 4.0E-02 | ENSG00000161681 | SHANK1         | 60.4    | 1.38 | 6.9E-03 |
| ENSG00000088387 | DOCK9         | 1471.7  | 1.45 | 1.2E-07 | ENSG00000168917 | SLC35G2        | 43.4    | 1.38 | 9.0E-04 |
| ENSG00000197191 | CYSRT1        | 77.2    | 1.45 | 2.2E-04 | ENSG00000134533 | REERG          | 63.9    | 1.37 | 3.3E-03 |
| ENSG00000183117 | CSMD1         | 33.0    | 1.45 | 3.9E-02 | ENSG00000166165 | CKB            | 2640.8  | 1.37 | 1.4E-10 |
| ENSG00000255837 | TAS2R20       | 13.5    | 1.45 | 4.3E-02 | ENSG00000210164 | MT-TG          | 112.1   | 1.37 | 2.7E-02 |
| ENSG00000148803 | FUOM          | 145.3   | 1.45 | 7.8E-03 | ENSG00000100285 | NEFH           | 27.6    | 1.37 | 1.3E-02 |
| ENSG00000114631 | PODXL2        | 139.1   | 1.44 | 3.2E-02 | ENSG00000077009 | NMRK2          | 1257.1  | 1.37 | 4.2E-02 |
| ENSG00000204103 | MAFB          | 80.6    | 1.44 | 6.5E-04 | ENSG00000106617 | PRKAG2         | 4608.9  | 1.37 | 2.3E-04 |
| ENSG00000170579 | DLGAP1        | 21.1    | 1.44 | 2.3E-02 | ENSG00000241528 |                | 31.0    | 1.36 | 9.6E-03 |
| ENSG00000162777 | DENND2D       | 20.9    | 1.44 | 3.8E-02 | ENSG00000247627 | MTND4P12       | 7369.3  | 1.36 | 6.7E-03 |
| ENSG00000157119 | KLHL40        | 57.3    | 1.44 | 4.5E-02 | ENSG00000145721 | LIX1           | 179.9   | 1.36 | 1.4E-02 |
| ENSG00000105290 | APLP1         | 526.2   | 1.44 | 3.2E-05 | ENSG00000171992 | SYNPO          | 4930.7  | 1.36 | 2.0E-02 |
| ENSG00000183324 | REC114        | 84.9    | 1.43 | 3.0E-03 | ENSG00000165359 | DDX26B         | 2622.3  | 1.36 | 2.4E-05 |
| ENSG00000167191 | GPRC5B        | 2043.1  | 1.43 | 9.2E-05 | ENSG00000209082 | MT-TL1         | 432.9   | 1.36 | 2.6E-04 |
| ENSG00000196074 | SYCP2         | 61.2    | 1.43 | 4.0E-03 | ENSG00000117425 | PTCH2          | 61.0    | 1.36 | 4.3E-04 |
| ENSG00000211459 | MT-RNR1       | 60185.8 | 1.43 | 1.3E-03 | ENSG00000113240 | CLK4           | 1229.8  | 1.36 | 1.9E-06 |
| ENSG00000162572 | SCNN1D        | 677.7   | 1.43 | 3.9E-04 | ENSG00000137868 | STRA6          | 439.5   | 1.36 | 2.0E-03 |
| ENSG00000128802 |               | 48.2    | 1.43 | 1.7E-03 | ENSG00000248923 | MTND5P11       | 44.2    | 1.35 | 2.6E-02 |
| ENSG00000178803 | ADORA2A-AS1   | 67.7    | 1.43 | 3.3E-03 | ENSG00000176170 | SPHK1          | 101.4   | 1.35 | 6.6E-04 |
| ENSG00000267385 | CTB-50L17.14  | 19.8    | 1.42 | 2.6E-02 | ENSG00000184009 | ACTG1          | 20139.5 | 1.35 | 6.8E-18 |
| ENSG00000214827 | MTCPI1        | 73.9    | 1.42 | 1.7E-03 | ENSG00000166839 | ANKDD1A        | 124.1   | 1.35 | 7.8E-05 |
| ENSG00000132386 | SERPINF1      | 491.9   | 1.42 | 2.3E-03 | ENSG00000227398 | KIF9-AS1       | 144.5   | 1.35 | 2.1E-05 |
| ENSG00000198879 | SFMBT2        | 535.9   | 1.42 | 9.8E-05 | ENSG00000197696 | NMB            | 110.9   | 1.35 | 1.1E-03 |
| ENSG00000115657 | ABCB6         | 214.6   | 1.42 | 1.4E-03 | ENSG00000211445 | GPX3           | 3054.6  | 1.35 | 1.6E-03 |
| ENSG00000172346 | CSDC2         | 134.7   | 1.42 | 6.3E-05 | ENSG00000105649 | RAB3A          | 295.6   | 1.35 | 4.7E-04 |
| ENSG00000133069 | TMCC2         | 419.1   | 1.42 | 2.3E-04 | ENSG00000152061 | RABGAP1L       | 3413.7  | 1.35 | 7.1E-06 |
| ENSG00000119686 | FLVCR2        | 54.0    | 1.42 | 1.1E-02 | ENSG00000187783 | TMEM72         | 201.2   | 1.34 | 5.7E-03 |
| ENSG00000099984 | GSTT2         | 67.2    | 1.42 | 2.0E-03 | ENSG00000262902 | RP11-750B16.1  | 56.9    | 1.34 | 2.1E-02 |
| ENSG00000164620 | RELL2         | 34.7    | 1.42 | 2.4E-03 | ENSG00000267750 | RUNDC3A-AS1    | 28.8    | 1.34 | 8.5E-03 |
| ENSG00000237753 | AC079922.3    | 68.1    | 1.42 | 4.8E-04 | ENSG00000130540 | SULT4A1        | 49.1    | 1.34 | 2.0E-02 |
| ENSG00000243449 | C4orf48       | 198.3   | 1.42 | 1.5E-04 | ENSG00000228727 | SAPCD1         | 16.5    | 1.34 | 2.7E-02 |
| ENSG00000184305 | CCSER1        | 43.7    | 1.42 | 2.1E-03 | ENSG00000069696 | DRD4           | 51.1    | 1.34 | 2.7E-03 |
| ENSG00000205678 | TECRL         | 17103.6 | 1.42 | 8.1E-03 | ENSG00000166793 | YPEL4          | 123.4   | 1.34 | 3.7E-07 |
| ENSG00000156885 | COX6A2        | 1589.3  | 1.42 | 4.7E-03 | ENSG00000204851 | PNMAL2         | 36.4    | 1.34 | 5.1E-03 |
| ENSG00000111452 | ADGRD1        | 1347.8  | 1.41 | 2.9E-04 | ENSG00000002016 | RAD52          | 542.4   | 1.34 | 7.9E-10 |



|                 |               |          |      |         |                 |               |          |      |         |
|-----------------|---------------|----------|------|---------|-----------------|---------------|----------|------|---------|
| ENSG00000162426 | SLC45A1       | 38.4     | 1.34 | 3.1E-03 | ENSG00000185100 | ADSSL1        | 2063.3   | 1.25 | 2.3E-03 |
| ENSG00000256967 | RP11-273B20.1 | 15.9     | 1.33 | 4.7E-02 | ENSG00000204052 | LRRC73        | 117.2    | 1.25 | 2.1E-04 |
| ENSG00000262772 | RP11-353N14.2 | 30.1     | 1.33 | 7.4E-03 | ENSG00000139631 | CSAD          | 651.8    | 1.25 | 4.1E-10 |
| ENSG00000261452 |               | 76.8     | 1.33 | 1.2E-04 | ENSG00000236266 | RP3-467L1.4   | 14.8     | 1.25 | 4.3E-02 |
| ENSG00000248019 | FAM13A-AS1    | 230.2    | 1.33 | 2.1E-05 | ENSG00000198938 | MT-CO3        | 274468.8 | 1.25 | 3.8E-02 |
| ENSG00000109046 | WSB1          | 16623.4  | 1.33 | 6.8E-04 | ENSG00000163376 | KBTBD8        | 95.7     | 1.25 | 9.2E-03 |
| ENSG00000214870 | AC004540.5    | 40.4     | 1.33 | 3.8E-03 | ENSG00000134917 | ADAMTS8       | 2665.4   | 1.25 | 1.5E-02 |
| ENSG00000269996 |               | 109.2    | 1.33 | 3.9E-06 | ENSG00000187994 | RINL          | 27.8     | 1.25 | 1.4E-02 |
| ENSG00000233175 | CTD-2020K17.3 | 27.5     | 1.32 | 4.5E-02 | ENSG00000149557 | FEZ1          | 631.0    | 1.25 | 4.3E-04 |
| ENSG00000188042 | ARL4C         | 60.6     | 1.32 | 6.0E-03 | ENSG00000198804 | MT-CO1        | 660131.0 | 1.25 | 9.2E-03 |
| ENSG00000073417 | PDE8A         | 833.4    | 1.32 | 2.2E-06 | ENSG00000069974 | RAB27A        | 754.6    | 1.25 | 2.8E-04 |
| ENSG00000258602 | RP11-7F17.7   | 37.1     | 1.32 | 1.9E-02 | ENSG00000260415 |               | 19.2     | 1.25 | 2.4E-02 |
| ENSG00000235194 | PPP1R3E       | 1195.8   | 1.32 | 1.0E-03 | ENSG00000227082 | CH17-437K3.1  | 55.8     | 1.24 | 1.6E-03 |
| ENSG00000141505 | ASGR1         | 52.9     | 1.32 | 3.1E-03 | ENSG00000213903 | LTB4R         | 121.7    | 1.24 | 5.8E-04 |
| ENSG00000184544 | DHRS7C        | 150.6    | 1.32 | 1.3E-03 | ENSG00000069493 | CLEC2D        | 463.4    | 1.24 | 9.1E-03 |
| ENSG00000185404 | SP140L        | 26.9     | 1.32 | 2.4E-02 | ENSG00000166548 | TK2           | 505.6    | 1.24 | 2.8E-05 |
| ENSG00000142178 | SIK1          | 356.3    | 1.32 | 1.8E-02 | ENSG00000135119 | RNFT2         | 76.4     | 1.24 | 6.7E-04 |
| ENSG00000063761 | ADCK1         | 385.2    | 1.31 | 3.1E-03 | ENSG00000042980 | ADAM28        | 35.2     | 1.24 | 2.7E-02 |
| ENSG00000237973 | RP5-857K21.6  | 61660.1  | 1.31 | 7.4E-03 | ENSG00000136490 | LIMD2         | 73.9     | 1.24 | 2.4E-03 |
| ENSG00000206077 | ZDHHHC11B     | 401.1    | 1.31 | 1.8E-03 | ENSG00000196123 | KIAA0895L     | 2139.7   | 1.24 | 2.1E-07 |
| ENSG00000141401 | IMPA2         | 58.8     | 1.31 | 1.1E-03 | ENSG00000188385 | JAKMIP3       | 97.8     | 1.24 | 9.8E-04 |
| ENSG00000128298 | BAIAP2L2      | 93.8     | 1.31 | 7.5E-04 | ENSG00000117479 | SLC19A2       | 932.1    | 1.23 | 1.3E-02 |
| ENSG00000188322 | SBK1          | 209.1    | 1.31 | 2.6E-06 | ENSG00000172819 | RARG          | 237.9    | 1.23 | 5.4E-04 |
| ENSG00000112715 | VEGFA         | 18981.8  | 1.31 | 1.8E-02 | ENSG00000184371 | CSF1          | 833.4    | 1.23 | 2.8E-03 |
| ENSG00000222020 | AC062017.1    | 28.1     | 1.31 | 1.2E-02 | ENSG00000171729 | TMEM51        | 286.1    | 1.23 | 4.8E-05 |
| ENSG00000182118 | FAM89A        | 45.7     | 1.31 | 8.3E-03 | ENSG00000143110 | C1orf162      | 117.9    | 1.23 | 1.4E-04 |
| ENSG00000167676 | PLIN4         | 72.2     | 1.30 | 4.8E-03 | ENSG00000091129 | NRCAM         | 90.6     | 1.23 | 2.0E-02 |
| ENSG00000092929 | UNC13D        | 405.3    | 1.30 | 1.8E-10 | ENSG00000146966 | DENND2A       | 221.2    | 1.23 | 7.2E-06 |
| ENSG00000259425 | RP11-566K19.5 | 58.3     | 1.30 | 3.0E-02 | ENSG00000163794 | UCN           | 67.1     | 1.23 | 1.7E-03 |
| ENSG00000060656 | PTPRU         | 2876.7   | 1.30 | 5.3E-07 | ENSG00000188004 | C1orf204      | 45.2     | 1.23 | 1.2E-02 |
| ENSG00000162650 | ATXN7L2       | 257.5    | 1.30 | 6.7E-05 | ENSG00000242759 | LINC00882     | 27.6     | 1.23 | 9.9E-03 |
| ENSG00000250891 | CTD-2281M20.1 | 115.0    | 1.30 | 1.3E-02 | ENSG00000198832 | SELM          | 971.8    | 1.23 | 4.8E-04 |
| ENSG00000056487 | PHF21B        | 145.7    | 1.30 | 1.7E-05 | ENSG00000183963 | SMTN          | 2701.2   | 1.22 | 9.2E-05 |
| ENSG00000271959 | CTD-3064M3.7  | 1148.1   | 1.30 | 1.3E-02 | ENSG00000166206 | GABRB3        | 403.1    | 1.22 | 4.8E-02 |
| ENSG00000099999 | RNF215        | 509.9    | 1.29 | 2.8E-10 | ENSG00000228594 | C1orf233      | 706.7    | 1.22 | 2.1E-04 |
| ENSG00000198003 | CCDC151       | 37.9     | 1.29 | 4.6E-03 | ENSG00000181577 | C6orf223      | 33.3     | 1.22 | 2.8E-02 |
| ENSG00000260261 | RP11-480A16.1 | 45.5     | 1.29 | 6.6E-03 | ENSG00000249119 | MTND6P4       | 15575.6  | 1.22 | 1.6E-02 |
| ENSG00000138744 | NAAA          | 168.7    | 1.29 | 1.7E-05 | ENSG00000136274 | NACAD         | 329.3    | 1.22 | 2.4E-04 |
| ENSG00000112559 | MDF1          | 166.4    | 1.29 | 4.9E-03 | ENSG00000163393 | SLC22A15      | 108.2    | 1.22 | 1.8E-04 |
| ENSG00000177106 | EPS8L2        | 296.9    | 1.29 | 1.1E-03 | ENSG00000178623 | GPR35         | 146.6    | 1.22 | 2.5E-04 |
| ENSG00000078814 | MYH7B         | 18076.4  | 1.29 | 6.1E-04 | ENSG00000198695 | MT-ND6        | 176797.7 | 1.22 | 1.9E-02 |
| ENSG00000235092 | ID2-AS1       | 31.8     | 1.28 | 1.3E-02 | ENSG00000250222 | CTC-338M12.5  | 44.7     | 1.22 | 2.4E-02 |
| ENSG00000125454 | SLC25A19      | 102.5    | 1.28 | 2.9E-04 | ENSG00000250508 | RP11-757G1.6  | 32.8     | 1.22 | 2.0E-02 |
| ENSG00000109063 | MYH3          | 67.3     | 1.28 | 2.2E-03 | ENSG00000248698 | LINC01085     | 53.9     | 1.22 | 4.4E-02 |
| ENSG00000270028 | RP11-380L11.4 | 35.5     | 1.28 | 6.5E-03 | ENSG00000260793 | RP5-882C2.2   | 122.3    | 1.21 | 5.8E-04 |
| ENSG00000184185 | KCNJ12        | 360.5    | 1.28 | 5.8E-05 | ENSG00000105419 | MEIS3         | 308.8    | 1.21 | 2.7E-05 |
| ENSG00000157890 | MEGF11        | 77.8     | 1.28 | 5.3E-03 | ENSG00000111666 | CHPT1         | 698.0    | 1.21 | 8.9E-06 |
| ENSG00000242686 | RP11-1191J2.2 | 96.4     | 1.28 | 2.4E-03 | ENSG00000260912 | RP11-363E7.4  | 50.4     | 1.21 | 1.0E-02 |
| ENSG00000260121 | RP5-1142A6.9  | 79.8     | 1.28 | 9.3E-03 | ENSG00000176490 | DIRAS1        | 685.6    | 1.21 | 3.9E-06 |
| ENSG00000137872 | SEMA6D        | 3585.6   | 1.28 | 1.5E-04 | ENSG00000206567 | AC022007.5    | 80.7     | 1.21 | 1.7E-03 |
| ENSG00000105516 | DBP           | 467.2    | 1.28 | 1.4E-05 | ENSG00000243927 | MRPS6         | 2001.4   | 1.21 | 5.7E-04 |
| ENSG00000198886 | MT-ND4        | 618768.2 | 1.27 | 1.3E-02 | ENSG00000224729 | PCOLCE-AS1    | 68.5     | 1.21 | 2.1E-02 |
| ENSG00000213983 | APIG2         | 665.3    | 1.27 | 6.5E-12 | ENSG00000138434 | SSFA2         | 4062.1   | 1.21 | 6.5E-08 |
| ENSG00000110628 | SLC22A18      | 586.0    | 1.27 | 3.1E-10 | ENSG00000163517 | HDAC11        | 1254.9   | 1.21 | 2.7E-05 |
| ENSG00000210176 | MT-TH         | 107.0    | 1.27 | 2.8E-02 | ENSG00000103740 | ACSBG1        | 31.5     | 1.21 | 2.2E-02 |
| ENSG00000224699 | LAMTOR5-AS1   | 21.1     | 1.27 | 2.4E-02 | ENSG00000160678 | S100A1        | 60.1     | 1.21 | 8.9E-03 |
| ENSG00000036448 | MYOM2         | 2900.1   | 1.27 | 1.0E-02 | ENSG00000163032 | VSNL1         | 655.7    | 1.20 | 3.6E-02 |
| ENSG00000112394 | SLC16A10      | 357.9    | 1.27 | 1.3E-03 | ENSG00000099282 | TSPAN15       | 70.4     | 1.20 | 3.9E-02 |
| ENSG00000139200 | PIANP         | 63.8     | 1.27 | 4.7E-02 | ENSG00000245248 | USP2-AS1      | 22.2     | 1.20 | 4.0E-02 |
| ENSG00000172594 | SMPDL3A       | 142.1    | 1.27 | 1.9E-03 | ENSG00000138823 | MTTP          | 22.7     | 1.20 | 2.2E-02 |
| ENSG00000126822 | PLEKHG3       | 1092.4   | 1.26 | 1.9E-05 | ENSG00000130700 | GATA5         | 194.6    | 1.20 | 1.3E-05 |
| ENSG00000143140 |               | 2882.5   | 1.26 | 1.9E-03 | ENSG00000182109 | RP11-69E11.4  | 39.6     | 1.20 | 3.9E-03 |
| ENSG00000008283 | CYB561        | 366.1    | 1.26 | 3.5E-05 | ENSG00000180448 | HMHA1         | 1125.0   | 1.20 | 4.2E-02 |
| ENSG00000154134 | ROB3          | 36.9     | 1.26 | 2.1E-02 | ENSG00000171163 | ZNF692        | 1312.4   | 1.20 | 1.5E-08 |
| ENSG00000255153 | TOLLIP-AS1    | 15.4     | 1.26 | 4.8E-02 | ENSG00000085514 | JPH3          | 471.4    | 1.20 | 5.2E-06 |
| ENSG00000198870 | STKLD1        | 30.9     | 1.26 | 7.0E-03 | ENSG00000102032 | RENBP         | 304.1    | 1.20 | 1.1E-03 |
| ENSG00000110013 | SIAE          | 602.3    | 1.26 | 2.6E-03 | ENSG00000260293 | RP11-715I22.6 | 24.1     | 1.20 | 2.9E-02 |
| ENSG00000079691 | LRRC16A       | 417.7    | 1.26 | 9.9E-04 | ENSG00000225138 | CTD-2228K2.7  | 1033.4   | 1.20 | 4.8E-05 |
| ENSG00000164742 | ADCY1         | 861.8    | 1.25 | 1.6E-04 | ENSG00000112695 | COX7A2        | 1951.3   | 1.20 | 8.6E-04 |
| ENSG00000166562 | SEC11C        | 188.3    | 1.25 | 3.3E-03 | ENSG00000085514 | PILRA         | 42.0     | 1.20 | 8.3E-03 |
| ENSG00000173531 | MST1          | 492.8    | 1.25 | 3.6E-06 | ENSG00000136449 | MYCBPAP       | 27.9     | 1.19 | 2.4E-02 |
| ENSG00000228203 | RNF144A-AS1   | 14.8     | 1.25 | 4.9E-02 | ENSG00000198934 | MAGEE1        | 312.0    | 1.19 | 2.5E-07 |

|                 |               |         |      |         |                 |               |         |      |         |
|-----------------|---------------|---------|------|---------|-----------------|---------------|---------|------|---------|
| ENSG00000197140 | ADAM32        | 33.2    | 1.19 | 3.4E-02 | ENSG00000092096 | SLC22A17      | 1546.8  | 1.13 | 4.1E-06 |
| ENSG00000130294 | KIF1A         | 3680.2  | 1.19 | 8.5E-03 | ENSG00000155324 | GRAMD3        | 466.0   | 1.13 | 3.9E-06 |
| ENSG00000114948 | ADAM23        | 6955.2  | 1.19 | 1.4E-04 | ENSG00000105479 | CCDC114       | 47.1    | 1.13 | 1.3E-02 |
| ENSG00000160469 | BRSK1         | 780.6   | 1.19 | 2.9E-09 | ENSG00000186603 | HPDL          | 29.0    | 1.13 | 2.0E-02 |
| ENSG00000205464 | ATP6AP1L      | 146.5   | 1.19 | 7.2E-06 | ENSG00000089225 | TBX5          | 3651.3  | 1.13 | 1.6E-03 |
| ENSG00000110723 | EXPH5         | 46.1    | 1.19 | 9.3E-03 | ENSG00000057252 | SOAT1         | 527.0   | 1.13 | 1.3E-07 |
| ENSG00000153982 | GDPD1         | 153.5   | 1.19 | 4.1E-06 | ENSG00000172893 | DHCR7         | 1240.2  | 1.12 | 4.0E-05 |
| ENSG00000102349 | KLF8          | 188.7   | 1.19 | 8.5E-06 | ENSG00000164951 | PDP1          | 656.1   | 1.12 | 2.8E-04 |
| ENSG00000147155 | EBP           | 703.0   | 1.19 | 8.8E-03 | ENSG00000154265 | ABCA5         | 418.5   | 1.12 | 6.8E-04 |
| ENSG00000135722 | FBXL8         | 152.6   | 1.19 | 4.8E-03 | ENSG00000188818 | ZDHHC11       | 224.3   | 1.12 | 9.0E-03 |
| ENSG00000264469 |               | 63.1    | 1.19 | 3.6E-03 | ENSG00000233621 | LINC01137     | 29.7    | 1.12 | 2.1E-02 |
| ENSG00000167100 | SAMD14        | 67.0    | 1.19 | 2.4E-02 | ENSG00000159314 | ARHGAP27      | 262.5   | 1.12 | 3.6E-03 |
| ENSG00000146067 | FAM193B       | 1939.8  | 1.18 | 6.8E-08 | ENSG00000088340 | FER1L4        | 984.3   | 1.12 | 4.6E-02 |
| ENSG00000260193 | RP11-83N9.5   | 39.4    | 1.18 | 1.3E-02 | ENSG00000135605 | TEC           | 131.4   | 1.12 | 4.4E-04 |
| ENSG00000147174 | ACRC          | 31.9    | 1.18 | 2.9E-02 | ENSG00000165061 | ZMAT4         | 157.1   | 1.12 | 3.6E-04 |
| ENSG00000172824 | CES4A         | 350.5   | 1.18 | 8.2E-06 | ENSG00000188176 | SMTNL2        | 1733.8  | 1.12 | 1.8E-03 |
| ENSG00000166592 | RRAD          | 6005.5  | 1.18 | 7.0E-05 | ENSG00000198780 | FAM169A       | 165.0   | 1.12 | 1.7E-03 |
| ENSG00000215375 | MYL5          | 311.6   | 1.18 | 3.3E-05 | ENSG00000106336 | FBXO24        | 40.1    | 1.12 | 2.0E-02 |
| ENSG00000177614 | PGBD5         | 307.4   | 1.18 | 6.5E-03 | ENSG00000120889 | TNFRSF10B     | 2284.9  | 1.12 | 2.0E-05 |
| ENSG00000184005 | ST6GALNAC3    | 313.7   | 1.18 | 2.8E-03 | ENSG00000174437 | ATP2A2        | 70197.4 | 1.12 | 1.4E-04 |
| ENSG00000224389 | C4B           | 180.4   | 1.18 | 5.9E-03 | ENSG00000177595 | PIDD1         | 913.0   | 1.12 | 6.7E-04 |
| ENSG00000114270 | COL7A1        | 4508.7  | 1.17 | 9.1E-06 | ENSG00000167216 | KATNAL2       | 67.9    | 1.12 | 4.5E-03 |
| ENSG00000142910 | TINAGL1       | 1279.8  | 1.17 | 1.8E-03 | ENSG00000175395 | ZNF25         | 372.0   | 1.11 | 3.7E-07 |
| ENSG00000131979 | GCH1          | 45.3    | 1.17 | 1.5E-02 | ENSG00000167280 | ENGASE        | 1951.4  | 1.11 | 3.8E-10 |
| ENSG0000014914  | MTMR11        | 103.1   | 1.17 | 9.8E-03 | ENSG00000078596 | ITM2A         | 580.7   | 1.11 | 7.2E-03 |
| ENSG00000204311 | DFNB59        | 88.9    | 1.17 | 9.7E-04 | ENSG00000140057 | AK7           | 47.8    | 1.11 | 5.1E-03 |
| ENSG00000144935 | TRPC1         | 915.1   | 1.17 | 5.4E-08 | ENSG00000167037 | SGSM1         | 119.3   | 1.11 | 4.5E-02 |
| ENSG00000181097 | RP11-429J17.2 | 25.0    | 1.17 | 2.3E-02 | ENSG00000175229 | GAL3ST3       | 309.7   | 1.11 | 1.0E-04 |
| ENSG00000140332 | TLE3          | 513.7   | 1.17 | 1.6E-04 | ENSG00000165338 | HECTD2        | 904.7   | 1.11 | 9.1E-05 |
| ENSG00000212907 | MT-ND4L       | 81374.2 | 1.17 | 2.6E-02 | ENSG00000105613 | MAST1         | 54.5    | 1.11 | 2.5E-02 |
| ENSG00000185187 | SIGIRR        | 289.3   | 1.17 | 3.3E-06 | ENSG00000105281 | SLC1A5        | 643.2   | 1.11 | 4.6E-02 |
| ENSG00000139899 | CBLN3         | 50.7    | 1.17 | 1.7E-02 | ENSG00000103160 | HSDL1         | 2650.1  | 1.11 | 6.9E-03 |
| ENSG00000103253 | HAGHL         | 408.9   | 1.16 | 2.0E-06 | ENSG00000155016 | CYP2U1        | 213.8   | 1.11 | 6.4E-06 |
| ENSG00000137393 | RNF144B       | 170.1   | 1.16 | 1.2E-02 | ENSG00000261087 | KB-1460A1.5   | 52.7    | 1.10 | 1.5E-02 |
| ENSG00000227195 | MIR663AHG     | 79.4    | 1.16 | 2.9E-02 | ENSG00000267980 | AC007292.6    | 18.7    | 1.10 | 4.9E-02 |
| ENSG00000145882 | PCYOX1L       | 505.6   | 1.16 | 1.2E-05 | ENSG00000172232 | AZU1          | 27.3    | 1.10 | 2.8E-02 |
| ENSG00000114779 | ABHD14B       | 427.6   | 1.16 | 5.1E-06 | ENSG00000213213 | CCDC183       | 1052.8  | 1.10 | 1.0E-04 |
| ENSG00000173715 | C11orf80      | 146.1   | 1.16 | 2.1E-04 | ENSG00000099260 | PALMD         | 189.3   | 1.10 | 8.4E-03 |
| ENSG00000228252 | COL6A4P2      | 86.7    | 1.16 | 4.3E-02 | ENSG00000054983 | GALC          | 1271.6  | 1.10 | 1.8E-03 |
| ENSG00000210196 | MT-TP         | 6378.1  | 1.16 | 2.7E-02 | ENSG00000197291 | RAMP2-AS1     | 31.2    | 1.10 | 1.3E-02 |
| ENSG00000160460 | SPTBN4        | 72.0    | 1.16 | 2.4E-02 | ENSG00000140876 | NUDT7         | 58.5    | 1.10 | 2.4E-02 |
| ENSG00000111885 | MAN1A1        | 1240.3  | 1.15 | 2.1E-02 | ENSG00000099822 | HCN2          | 150.8   | 1.10 | 3.0E-03 |
| ENSG00000104888 | SLC17A7       | 43.7    | 1.15 | 6.0E-03 | ENSG00000141140 |               | 790.8   | 1.10 | 2.1E-08 |
| ENSG00000167107 | ACSF2         | 1812.4  | 1.15 | 6.9E-04 | ENSG00000100003 | SEC14L2       | 126.6   | 1.10 | 3.0E-04 |
| ENSG00000184451 | CCR10         | 100.5   | 1.15 | 7.0E-04 | ENSG00000205560 | CPT1B         | 114.0   | 1.10 | 1.3E-02 |
| ENSG00000176749 | CDK5R1        | 108.5   | 1.15 | 2.8E-03 | ENSG00000260000 | RP3-467N11.1  | 41.3    | 1.09 | 2.1E-02 |
| ENSG00000050555 | LAMC3         | 82.7    | 1.15 | 1.8E-02 | ENSG00000206344 | HCG27         | 76.1    | 1.09 | 7.8E-03 |
| ENSG00000130433 | CACNG6        | 35.2    | 1.15 | 2.8E-02 | ENSG00000135541 | AHI1          | 473.0   | 1.09 | 4.8E-04 |
| ENSG00000063180 | CA11          | 443.6   | 1.15 | 9.1E-06 | ENSG00000174628 | IQCK          | 87.9    | 1.09 | 2.8E-03 |
| ENSG00000261051 | RP11-274H2.5  | 42.4    | 1.15 | 4.4E-02 | ENSG00000129951 | LPPR3         | 195.2   | 1.09 | 7.4E-03 |
| ENSG00000184828 | ZBTB7C        | 72.0    | 1.15 | 2.9E-02 | ENSG00000121057 | AKAP1         | 3339.0  | 1.09 | 7.3E-04 |
| ENSG00000129295 | LRRC6         | 26.9    | 1.15 | 3.1E-02 | ENSG00000258301 | RP11-488C13.5 | 36.2    | 1.09 | 2.3E-02 |
| ENSG00000100321 | SYNGR1        | 1326.4  | 1.15 | 4.4E-05 | ENSG00000074855 | ANO8          | 1171.3  | 1.09 | 5.2E-06 |
| ENSG00000148288 | GBGT1         | 31.1    | 1.15 | 3.0E-02 | ENSG00000155367 | PPM1J         | 143.6   | 1.08 | 1.2E-04 |
| ENSG00000132016 | C19orf57      | 63.0    | 1.14 | 7.3E-03 | ENSG00000107821 | KAZALD1       | 164.3   | 1.08 | 1.3E-03 |
| ENSG00000240038 | AMY2B         | 689.3   | 1.14 | 3.0E-06 | ENSG00000173457 | PPP1R14B      | 552.7   | 1.08 | 1.2E-04 |
| ENSG00000163618 | CADPS         | 1080.1  | 1.14 | 9.8E-04 | ENSG00000244731 | C4A           | 206.8   | 1.08 | 1.2E-02 |
| ENSG00000168528 | SERINC2       | 112.5   | 1.14 | 2.7E-02 | ENSG00000136866 | ZFP37         | 60.1    | 1.08 | 9.0E-03 |
| ENSG00000182379 | NXP4          | 431.2   | 1.14 | 3.3E-02 | ENSG00000173947 | PIFO          | 505.3   | 1.08 | 5.2E-04 |
| ENSG00000089060 | SLC8B1        | 110.5   | 1.14 | 1.6E-03 | ENSG00000160360 | GPSM1         | 2087.8  | 1.08 | 6.8E-04 |
| ENSG00000184402 | SS18L1        | 968.3   | 1.14 | 6.6E-04 | ENSG00000167766 | ZNF83         | 1750.8  | 1.08 | 6.0E-12 |
| ENSG00000171310 | CHST11        | 358.8   | 1.14 | 5.3E-03 | ENSG00000272288 | RP11-140K17.3 | 67.3    | 1.08 | 3.5E-02 |
| ENSG00000210195 | MT-TT         | 136.3   | 1.14 | 1.4E-02 | ENSG00000232442 | CTD-3184A7.4  | 74.7    | 1.08 | 2.7E-03 |
| ENSG00000157992 | KRTCAP3       | 23.9    | 1.14 | 3.9E-02 | ENSG00000116883 | RP11-268J15.5 | 570.8   | 1.08 | 4.9E-02 |
| ENSG00000054967 | RELT          | 71.3    | 1.14 | 2.7E-02 | ENSG00000137819 | PAQR5         | 80.6    | 1.08 | 3.8E-02 |
| ENSG00000165495 | PKNOX2        | 95.8    | 1.14 | 1.3E-02 | ENSG00000074800 | ENO1          | 53075.0 | 1.08 | 2.0E-02 |
| ENSG00000158716 | DUSP23        | 148.0   | 1.14 | 4.1E-02 | ENSG00000106772 | PRUNE2        | 388.0   | 1.08 | 1.4E-02 |
| ENSG00000099251 | HSD17B7P2     | 57.7    | 1.13 | 5.5E-03 | ENSG00000178573 | MAF           | 305.5   | 1.07 | 2.1E-02 |
| ENSG00000271971 | CTD-2006H14.2 | 37.8    | 1.13 | 2.9E-02 | ENSG00000198185 | ZNF334        | 238.3   | 1.07 | 1.6E-03 |
| ENSG00000111674 | ENO2          | 8317.9  | 1.13 | 1.9E-02 | ENSG00000236901 | MIR600HG      | 456.6   | 1.07 | 8.3E-03 |
| ENSG00000163040 | CCDC74A       | 56.8    | 1.13 | 2.8E-02 | ENSG00000144118 | RALB          | 872.7   | 1.07 | 7.2E-04 |
| ENSG00000198794 | SCAMP5        | 356.9   | 1.13 | 1.0E-04 | ENSG00000158292 | GPR153        | 390.3   | 1.07 | 2.1E-03 |

|                 |               |          |      |         |                 |               |         |      |         |
|-----------------|---------------|----------|------|---------|-----------------|---------------|---------|------|---------|
| ENSG00000153933 | DGKE          | 201.6    | 1.07 | 2.9E-03 | ENSG00000137857 | DUOX1         | 56.2    | 1.04 | 2.0E-02 |
| ENSG00000163050 | ADCK3         | 2942.1   | 1.07 | 1.3E-04 | ENSG00000224165 | DNAJC27-AS1   | 35.7    | 1.03 | 3.4E-02 |
| ENSG00000259291 | RP11-617F23.1 | 362.3    | 1.07 | 6.9E-05 | ENSG00000157470 | FAM81A        | 235.4   | 1.03 | 2.0E-02 |
| ENSG00000161653 | NAGS          | 100.7    | 1.07 | 7.8E-03 | ENSG00000187609 | EXD3          | 601.6   | 1.03 | 6.5E-06 |
| ENSG00000204084 | INPP5B        | 426.5    | 1.07 | 1.6E-05 | ENSG00000210049 | MT-TF         | 251.4   | 1.03 | 4.7E-02 |
| ENSG00000139974 | SLC38A6       | 73.5     | 1.07 | 1.5E-03 | ENSG00000170919 | TPT1-AS1      | 392.8   | 1.03 | 9.5E-04 |
| ENSG00000089723 | OTUB2         | 39.4     | 1.06 | 1.2E-02 | ENSG00000108474 | PIGL          | 213.7   | 1.03 | 3.6E-05 |
| ENSG00000168000 | BSCL2         | 55.4     | 1.06 | 7.5E-03 | ENSG00000132906 | CASP9         | 953.1   | 1.03 | 6.2E-04 |
| ENSG00000136404 | TM6SF1        | 152.0    | 1.06 | 8.2E-05 | ENSG00000101384 | JAG1          | 1322.6  | 1.03 | 3.2E-03 |
| ENSG00000072310 | SREBF1        | 2914.2   | 1.06 | 4.6E-03 | ENSG00000162946 | DISC1         | 95.1    | 1.03 | 2.5E-02 |
| ENSG00000270419 | CAHM          | 72.1     | 1.06 | 1.0E-02 | ENSG00000155066 | PROM2         | 132.9   | 1.02 | 8.8E-03 |
| ENSG00000136378 | ADAMTS7       | 622.1    | 1.06 | 4.2E-03 | ENSG00000099977 | DDT           | 107.5   | 1.02 | 2.1E-03 |
| ENSG00000145911 | N4BP3         | 243.7    | 1.06 | 9.5E-03 | ENSG00000166762 | CATSPER2      | 108.4   | 1.02 | 4.5E-02 |
| ENSG00000203485 | INF2          | 1240.4   | 1.06 | 7.0E-04 | ENSG00000143502 | SUSD4         | 397.3   | 1.02 | 1.6E-03 |
| ENSG00000174669 | SLC29A2       | 1622.0   | 1.06 | 2.9E-04 | ENSG00000138111 | TMEM180       | 71.8    | 1.02 | 3.1E-03 |
| ENSG00000187672 | ERC2          | 216.9    | 1.05 | 7.4E-04 | ENSG00000156804 | FBXO32        | 5742.8  | 1.02 | 6.8E-04 |
| ENSG00000132718 | SYT11         | 253.5    | 1.05 | 4.4E-03 | ENSG00000186577 | C6orf1        | 171.6   | 1.02 | 5.0E-04 |
| ENSG00000198786 | MT-ND5        | 408701.5 | 1.05 | 2.9E-02 | ENSG00000196757 | ZNF700        | 212.5   | 1.02 | 3.4E-02 |
| ENSG00000204054 | LINC00963     | 364.6    | 1.05 | 6.5E-06 | ENSG00000124772 | CPNE5         | 16717.9 | 1.02 | 1.8E-02 |
| ENSG00000196876 | SCN8A         | 64.6     | 1.05 | 2.4E-03 | ENSG00000183569 | SERHL2        | 54.4    | 1.02 | 4.8E-03 |
| ENSG00000136267 | DGKB          | 122.9    | 1.05 | 2.0E-02 | ENSG00000091262 | ABCC6         | 36.4    | 1.02 | 2.3E-02 |
| ENSG00000197565 | COL4A6        | 3126.6   | 1.05 | 1.3E-05 | ENSG00000225313 | RP11-415J8.3  | 35.7    | 1.01 | 2.9E-02 |
| ENSG00000143801 | PSEN2         | 511.4    | 1.05 | 6.2E-04 | ENSG00000103227 | LMF1          | 417.8   | 1.01 | 6.0E-03 |
| ENSG00000220785 | MTMR9LP       | 102.0    | 1.05 | 2.9E-03 | ENSG00000163617 | KIAA1407      | 88.9    | 1.01 | 4.1E-03 |
| ENSG00000223802 | CERS1         | 80.4     | 1.04 | 4.3E-03 | ENSG00000072201 | LNX1          | 110.5   | 1.01 | 2.9E-02 |
| ENSG00000111490 | TBC1D30       | 53.4     | 1.04 | 2.8E-02 | ENSG00000215788 | TNFRSF25      | 243.4   | 1.01 | 6.9E-04 |
| ENSG00000175197 | DDIT3         | 349.7    | 1.04 | 1.4E-02 | ENSG00000162769 | FLVCR1        | 369.7   | 1.01 | 3.8E-05 |
| ENSG00000013523 | ANGEL1        | 980.9    | 1.04 | 8.7E-07 | ENSG00000259605 | AC074212.5    | 80.6    | 1.01 | 1.6E-03 |
| ENSG00000186532 | SMYD4         | 510.7    | 1.04 | 1.7E-04 | ENSG00000069424 | KCNAB2        | 191.3   | 1.00 | 1.1E-03 |
| ENSG00000148187 | MRRF          | 600.2    | 1.04 | 2.8E-03 | ENSG00000108773 | KAT2A         | 2107.3  | 1.00 | 4.1E-07 |
| ENSG00000025434 | NR1H3         | 118.2    | 1.04 | 6.1E-04 | ENSG00000184916 | JAG2          | 801.7   | 1.00 | 1.3E-04 |
| ENSG00000181418 | DDN           | 384.2    | 1.04 | 1.5E-03 | ENSG00000260563 | RP13-516M14.1 | 55.7    | 1.00 | 1.3E-02 |
| ENSG00000227855 | DPY19L2P3     | 92.5     | 1.04 | 3.8E-02 | ENSG00000235280 | MCF2L-AS1     | 55.0    | 1.00 | 9.0E-03 |
| ENSG00000115318 | LOXL3         | 293.7    | 1.04 | 4.3E-02 | ENSG00000129244 | ATP1B2        | 2515.5  | 1.00 | 7.9E-04 |
| ENSG00000065833 | ME1           | 253.1    | 1.04 | 1.3E-02 | ENSG00000131435 | PDLIM4        | 418.1   | 1.00 | 2.6E-03 |
| ENSG00000189157 | FAM47E        | 30.8     | 1.04 | 3.5E-02 |                 |               |         |      |         |

**Supplemental Table 2: Correlation of our RNA sequencing data of human iPSC-derived atrial (iPSC-aCMs) and ventricular cardiomyocytes (iPSC-vCMs) with published transcriptomic data of human RA-treated and control ESC-derived cardiomyocytes (RA-CMs/CT-CMs).** RNA sequencing: n = 4 iPSC-vCM and n = 4 iPSC-aCM independent differentiation experiments at day 90 from 3 iPSC lines. Microarray: RA-CMs vs. CT-CMs at day 31 post-differentiation (1).

**(A)** List of 67 overlapping genes, which are significantly lower expressed both in iPSC-aCMs from our study (1.560 differential genes vs. iPSC-vCMs; log<sub>2</sub> fold < -0.5; P < 0.05) and in RA-CMs from the published data set (125 differential genes vs. CT-CMs).

| Gene name |
|-----------|-----------|-----------|-----------|-----------|-----------|-----------|
| HEY2      | MYL2      | FAM84B    | MARCH11   | ART3      | CHN1      | SGCE      |
| ALAS2     | NPNT      | TSPAN5    | PLXDC2    | MTUS2     | UBE2E2    | CORIN     |
| PDGFD     | EMILIN2   | LAMA4     | AHNAK     | SORBS2    | SH3GL3    | TNFRSF19  |
| NAV1      | FZD1      | DLC1      | SPOCK2    | NUP62CL   | RHOQ      | CITED2    |
| IRX4      | FGF18     | VCAN      | IFIT1     | SLC1A4    | ABLIM1    | FZD8      |
| TRIM9     | TLE4      | TMEM71    | PYGL      | PCDH20    | JPH1      | FHOD3     |
| MYH7      | ODAM      | KEL       | PACRG     | S100A4    | KCTD12    | TGFBR2    |
| PRDM16    | MASP1     | ERBB3     | STXBP6    | A4GALT    | FHL2      |           |
| HAND1     | TSHZ2     | PKP2      | PEG10     | MMP23B    | APIS2     |           |
| PLCXD3    | GUCY1A3   | MYCN      | CACHD1    | VCAM1     | UBE2E1    |           |

**(B)** List of 53 overlapping genes, which are significantly higher expressed both in iPSC-aCMs from our study (1.629 differential genes vs. iPSC-vCMs; log<sub>2</sub> fold > 0.5; P < 0.05) and in RA-CMs from the published data set (255 differential genes vs. CT-CMs).

| Gene name |
|-----------|-----------|-----------|-----------|-----------|-----------|-----------|
| SHOX2     | SMOC1     | PRSS8     | NR2F2     | C1orf105  | ADAMTS8   | SLIT2     |
| DACH2     | NR2F1     | PDGFRA    | FZD7      | SERPINF1  | FEZ1      | PKDCC     |
| KCNQ2     | KCNA5     | RAB33A    | KCNJ3     | RERG      | DENND2A   | COL6A1    |
| D4S234E   | NOV       | WFDC1     | DHRS9     | PRKAG2    | VSNL1     | ADCY5     |
| PTGDS     | SHD       | NELL1     | KIAA1324L | ACTG1     | JAG1      | ACTB      |
| MYBPHL    | BMP4      | BCAR3     | SAMD11    | GPX3      | FBXO32    |           |
| EGFR      | PLCG2     | CPE       | PSRC1     | SBK1      | TMEM141   |           |
| F10       | MBP       | GAD1      | ZNF385B   | MYOM2     | A2M       |           |

**Supplemental Table 3: Correlation of our RNA sequencing data of human iPSC-derived atrial (iPSC-aCMs) and ventricular cardiomyocytes (iPSC-vCMs) with published transcriptomic data of human fetal atrial and ventricular tissues.** RNA sequencing: n = 4 iPSC-vCM and n = 4 iPSC-aCM independent differentiation experiments at day 90 from 3 iPSC lines. Microarray: 15-week-old human fetal atrial and ventricular tissues (1).

**(A)** List of 152 overlapping genes, which are significantly lower expressed both in iPSC-aCMs from our study (1.560 differential genes vs. iPSC-vCMs; log<sub>2</sub> fold < -0.5; *P* < 0.05) and in human fetal atrial tissue from the published data set (768 differential genes vs. ventricular tissue).

| Gene name |
|-----------|-----------|-----------|-----------|-----------|-----------|-----------|
| HEY2      | EMILIN2   | DLC1      | LEFTY2    | SORBS2    | SLC44A1   | STMN1     |
| TMEM155   | LYPD1     | KANK4     | TCF4      | COBL      | BMP7      | BBS9      |
| PDGFD     | MURC      | ADAMTS9   | TMC6      | METAP1    | PGRMC2    | SNX6      |
| HOPX      | MAOB      | TMEM71    | PDK4      | ROR1      | LYRM1     | FASTKD1   |
| NAV1      | FZD1      | PPP1R1C   | LIN9      | SLC1A4    | FHL2      | TNFRSF19  |
| IRX4      | GJA1      | IRX3      | ARAP3     | XIRP1     | GJA3      | EIF3M     |
| KCNJ2     | COL15A1   | CCL21     | C15orf41  | HEPH      | RASD2     | TRIM2     |
| MXRA5     | LBH       | CD34      | SPRY2     | LCLAT1    | PPP2R5C   | SLC2A8    |
| ACE2      | XPO4      | P2RX1     | ETS1      | PCDH20    | CD58      | SLC38A2   |
| LPL       | FGF18     | PENK      | RND3      | SLC38A1   | SRP14     | FRMD5     |
| GAS7      | MASP1     | PKP2      | GABRB1    | MLLT11    | RAMP1     | FHOD3     |
| MYH7      | HECW2     | MYCN      | SMYD1     | SMYD2     | AP1S2     | CSRP2     |
| PRDM16    | DUSP5     | IRX5      | EPDR1     | S100A4    | C14orf180 | CTNNB1    |
| HAND1     | RGS5      | ARHGEF3   | SEC14L5   | A4GALT    | CACNB2    | SLC25A46  |
| PLCXD3    | GPM6B     | ACVRL1    | CAB39L    | C1orf74   | OSBPL8    | CYFIP2    |
| PHACTR1   | PCDH7     | MARCH11   | PRRX1     | KIDINS220 | UBE2E1    | RPL13     |
| SLC5A1    | GUCY1A3   | RBP7      | MAPKAPK3  | FBXW7     | HIGD1A    | DTNA      |
| MYL2      | KITLG     | C5orf46   | CCDC34    | HSDL2     | PPP2R5A   | RAB31P    |
| PRDM8     | TMEM159   | MDK       | TNNI3K    | BCL11A    | PRKCDBP   | STOM      |
| PHLDB2    | SLC27A6   | IL32      | HSPB6     | ABLIM1    | ZNF622    | NT5DC2    |
| GPR22     | FAM129A   | KLHL13    | GPD1L     | JPH1      | PERP      |           |
| VWC2      | CAV3      | PYGL      | ART3      | CCNG1     | NDRG4     |           |

**(B)** List of 93 overlapping genes, which are significantly higher expressed both in iPSC-aCMs from our study (1.629 differential genes vs. iPSC-vCMs; log<sub>2</sub> fold > 0.5; *P* < 0.05) and in human fetal atrial tissue from the published data set (485 differential genes vs. ventricular tissue).

| Gene name  | Gene name | Gene name |
|-----------|-----------|-----------|-----------|------------|-----------|-----------|
| DUOXA2    | COL2A1    | GAS1      | MYOT      | CHPT1      | INPP1     | SAT1      |
| D4S234E   | PLCG2     | HHATL     | SH3KBP1   | VSNL1      | CAMK1D    | MTHFR     |
| TSPAN7    | MBP       | NR2F2     | TGM1      | ST6GALNAC3 | COL9A1    | PKDCC     |
| MYBPHL    | INA       | PLL       | PRKAG2    | SLC22A17   | TMEM141   | PIGP      |
| DNER      | PDGFRA    | MAPK4     | GPX3      | ZDHHC11    | PLOD2     | PGM5      |
| METTL7B   | RAB33A    | KCNJ3     | RABGAP1L  | SMTNL2     | COL4A5    | MATN2     |
| IGSF9     | SYT4      | GNAO1     | DHRS7C    | ATP2A2     | LHPP      | H2AFY     |
| SMOC1     | UPB1      | FAM46C    | MYH3      | NUDT7      | SCD       | PABPN1    |
| NR2F1     | DDIT4L    | CAPN3     | MYOM2     | SYT11      | ARHGAP24  | SPATS2L   |
| KCNA5     | MYH6      | DHRS9     | SEC11C    | COL4A6     | MPP3      |           |
| ADM       | STEAP2    | KIAA1324L | KBTBD8    | ANGEL1     | DSC2      |           |
| RAP1GAP   | CACNA2D2  | TNK2      | ADAMTS8   | ME1        | C1QTNF3   |           |
| SLCO2A1   | LRRN2     | ZNF385B   | FEZ1      | JAG1       | ATP6V1G2  |           |
| SHD       | PDE8B     | C1orf105  | GABRB3    | FBXO32     | DAPK1     |           |

**Supplemental Table 4: Correlation of our RNA sequencing data of iPSC-derived atrial (aCMs) and ventricular cardiomyocytes (vCMs) with published transcriptomic data of human adult atrial (A) and ventricular (V) tissues.** RNA sequencing: n = 4 iPSC-vCM and n = 4 iPSC-aCM independent differentiation experiments at day 90 from 3 iPSC lines. Microarray: n=5 human adult right atrial and n =5 left ventricular tissues (2).

**(A)** List of 43 overlapping genes, which are significantly lower expressed both in iPSC-aCMs from our study (1.560 differential genes vs. iPSC-vCMs; log<sub>2</sub> fold < -0.5; *P* < 0.05) and in human adult atrial tissue from the published data set (126 differential genes vs. ventricular tissue).

|           | RNAseq                              | Asp et al.                |           | RNAseq                              | Asp et al.                |           | RNAseq                              | Asp et al.                |
|-----------|-------------------------------------|---------------------------|-----------|-------------------------------------|---------------------------|-----------|-------------------------------------|---------------------------|
| Gene name | log <sub>2</sub><br>(aCMs/<br>vCMs) | log <sub>2</sub><br>(A/V) | Gene name | log <sub>2</sub><br>(aCMs/<br>vCMs) | log <sub>2</sub><br>(A/V) | Gene name | log <sub>2</sub><br>(aCMs/<br>vCMs) | log <sub>2</sub><br>(A/V) |
| HEY2      | -5.12                               | -1.83                     | OR51E1    | -2.33                               | -1.49                     | INPP4B    | -1.09                               | -2.04                     |
| NAV1      | -4.03                               | -1.63                     | FBN2      | -2.18                               | -2.33                     | C10orf71  | -1.08                               | -1.52                     |
| KCNJ2     | -3.71                               | -1.96                     | TMEM71    | -2.12                               | -1.18                     | CHN1      | -1.04                               | -1.13                     |
| LPL       | -3.42                               | -3.16                     | GCNT2     | -1.91                               | -1.73                     | PLCL1     | -1.04                               | -1.18                     |
| MYH7      | -3.34                               | -2.24                     | GUCY1B3   | -1.72                               | -1.02                     | BCL11A    | -1.02                               | -1.02                     |
| NRAP      | -3.25                               | -1.46                     | PDE1C     | -1.68                               | -1.55                     | MYOM1     | -1.02                               | -1.25                     |
| PHACTR1   | -3.25                               | -1.48                     | PPFIBP1   | -1.66                               | -1.14                     | RHOQ      | -0.98                               | -1.15                     |
| MYL2      | -3.20                               | -7.15                     | C15orf41  | -1.63                               | -2.97                     | RAPGEF1   | -0.96                               | -1.11                     |
| PHLDB2    | -3.18                               | -2.05                     | SMYD1     | -1.59                               | -1.70                     | MPPED2    | -0.88                               | -1.08                     |
| MURC      | -2.98                               | -1.23                     | SV2B      | -1.56                               | -1.59                     | ASB2      | -0.85                               | -1.28                     |
| LRRC2     | -2.90                               | -2.45                     | XIRP2     | -1.43                               | -3.32                     | NDRG4     | -0.74                               | -1.78                     |
| LBH       | -2.72                               | -1.10                     | HSPB6     | -1.37                               | -2.15                     | FHOD3     | -0.62                               | -1.78                     |
| XPO4      | -2.69                               | -1.51                     | LCLAT1    | -1.16                               | -1.08                     | PTPRM     | -0.61                               | -1.25                     |
| GRAMD1B   | -2.51                               | -1.07                     | SLC38A1   | -1.15                               | -1.28                     |           |                                     |                           |
| GUCY1A2   | -2.33                               | -1.28                     | SMYD2     | -1.12                               | -2.90                     |           |                                     |                           |

**(B)** List of 54 overlapping genes, which are significantly higher expressed both in iPSC-aCMs from our study (1.629 differential genes vs. iPSC-vCMs; log<sub>2</sub> fold > 0.5; *P* < 0.05) and in human adult atrial tissue from the published data set (416 differential genes vs. ventricular tissue).

|           | RNAseq                              | Asp et al.                |           | RNAseq                              | Asp et al.                |           | RNAseq                              | Asp et al.                |
|-----------|-------------------------------------|---------------------------|-----------|-------------------------------------|---------------------------|-----------|-------------------------------------|---------------------------|
| Gene name | log <sub>2</sub><br>(aCMs/<br>vCMs) | log <sub>2</sub><br>(A/V) | Gene name | log <sub>2</sub><br>(aCMs/<br>vCMs) | log <sub>2</sub><br>(A/V) | Gene name | log <sub>2</sub><br>(aCMs/<br>vCMs) | log <sub>2</sub><br>(A/V) |
| D4S234E   | 3.28                                | 1.31                      | MYH6      | 2.01                                | 3.18                      | RERG      | 1.37                                | 1.45                      |
| VWDE      | 3.10                                | 3.18                      | STEAP2    | 2.01                                | 1.16                      | LRRC16A   | 1.26                                | 1.42                      |
| SYNPR     | 3.06                                | 2.75                      | LRP2      | 2.01                                | 3.14                      | KIF1A     | 1.19                                | 1.05                      |
| TSPAN7    | 3.02                                | 1.96                      | CPE       | 1.99                                | 1.35                      | C4A       | 1.08                                | 1.74                      |
| SKAP2     | 2.96                                | 1.18                      | RASGEF1B  | 1.98                                | 1.15                      | PRUNE2    | 1.08                                | 1.70                      |
| MYBPHL    | 2.95                                | 3.71                      | UPK1B     | 1.96                                | 2.81                      | TM6SF1    | 1.06                                | 1.29                      |
| DNER      | 2.91                                | 2.35                      | PDE8B     | 1.88                                | 2.34                      | INPP1     | 1.00                                | 1.07                      |
| METTL7B   | 2.76                                | 1.67                      | FAM153B   | 1.88                                | 1.64                      | CAMK1D    | 0.99                                | 2.01                      |
| GCNT1     | 2.74                                | 1.24                      | PLL       | 1.83                                | 1.70                      | L3MBTL4   | 0.85                                | 1.61                      |
| SMOC1     | 2.72                                | 2.01                      | CCDC109B  | 1.81                                | 1.53                      | SMPD3     | 0.85                                | 1.18                      |
| KCNA5     | 2.69                                | 1.80                      | KCNJ3     | 1.78                                | 2.83                      | DAPK1     | 0.84                                | 2.70                      |
| ADM       | 2.58                                | 1.57                      | HCN1      | 1.78                                | 1.74                      | SAT1      | 0.84                                | 1.44                      |
| NEB       | 2.57                                | 2.28                      | GNAO1     | 1.77                                | 1.52                      | CLSTN2    | 0.81                                | 1.40                      |
| ELMOD1    | 2.33                                | 1.40                      | ZNF385B   | 1.53                                | 2.12                      | NSUN7     | 0.80                                | 1.31                      |
| SYT4      | 2.26                                | 2.40                      | SLC39A8   | 1.52                                | 3.33                      | PGRMC1    | 0.79                                | 1.26                      |
| FGFR2     | 2.11                                | 1.24                      | SLC7A11   | 1.46                                | 3.18                      | SEMA3A    | 0.73                                | 1.64                      |
| POF1B     | 2.09                                | 1.55                      | MYRIP     | 1.41                                | 1.13                      | PRCP      | 0.70                                | 1.56                      |
| TIAM1     | 2.07                                | 1.53                      | TGM1      | 1.38                                | 1.32                      | MATN2     | 0.68                                | 1.89                      |

**Supplemental Table 5: Stable isotope labeling by amino acids in cell culture (SILAC)-based proteomic data of iPSC-derived atrial (aCMs) compared to ventricular cardiomyocytes (vCMs). n = 4 vCM and n = 4 aCM independent differentiation experiments at day 68 from iPSC line isWT1.Bld2.**

**(A) 1,442 proteins with log<sub>2</sub> fold < 0, of which 178 were significantly lower expressed in iPSC-aCMs.**

| Gene name          | log10 intensity | log2 (aCMs /vCMs) | Significance B | Gene names | log10 intensity | log2 (aCMs /vCMs) | Significance B |
|--------------------|-----------------|-------------------|----------------|------------|-----------------|-------------------|----------------|
| DCN                | 8.66            | -3.69             | 1.2E-08        | G6PD       | 9.30            | -1.88             | 1.1E-03        |
| SULT1E1            | 10.82           | -3.65             | 4.9E-15        | HSPB3      | 10.02           | -1.87             | 2.0E-04        |
| DCD                | 9.43            | -3.64             | 1.3E-09        | FBN2       | 9.15            | -1.87             | 2.4E-03        |
| KCTD12             | 10.17           | -3.58             | 2.0E-12        | S100A6     | 10.39           | -1.84             | 1.7E-04        |
| MYL3               | 11.27           | -3.50             | 5.6E-14        | NRAP       | 9.10            | -1.84             | 2.7E-03        |
| BGN                | 8.67            | -3.39             | 1.5E-07        | CDH3       | 8.70            | -1.83             | 3.4E-03        |
| S100A4             | 9.65            | -3.36             | 1.7E-09        | SPON1      | 9.62            | -1.81             | 5.9E-04        |
| MYL2               | 11.49           | -3.22             | 4.0E-12        | COL6A6     | 8.62            | -1.81             | 3.8E-03        |
| COL12A1            | 9.47            | -3.22             | 6.6E-08        | EPB41L2    | 9.17            | -1.78             | 3.5E-03        |
| ANXA1              | 10.48           | -3.17             | 3.9E-10        | GBE1       | 10.91           | -1.76             | 9.3E-05        |
| PLS3               | 10.03           | -3.07             | 2.3E-09        | PDE1C      | 9.00            | -1.73             | 4.6E-03        |
| MYL5               | 10.48           | -3.01             | 2.6E-09        | PSMB9      | 9.41            | -1.72             | 2.4E-03        |
| AIF1L              | 9.28            | -3.00             | 4.3E-07        | CSR1P      | 10.63           | -1.71             | 4.5E-04        |
| PSAT1              | 10.30           | -2.84             | 1.7E-08        | MYO1B      | 8.50            | -1.71             | 5.8E-03        |
| BCAT1              | 8.99            | -2.79             | 1.1E-05        | SERPINE2   | 9.14            | -1.70             | 5.3E-03        |
| NNMT               | 9.16            | -2.72             | 1.7E-05        | REEP6      | 8.65            | -1.68             | 6.6E-03        |
| FLNB               | 9.71            | -2.69             | 9.1E-07        | FAM84B     | 9.11            | -1.68             | 5.7E-03        |
| IQGAP1             | 9.85            | -2.69             | 1.4E-07        | CAB39L     | 9.91            | -1.68             | 7.9E-04        |
| MDK                | 10.00           | -2.68             | 1.6E-07        | POMP       | 9.01            | -1.66             | 6.4E-03        |
| ARG2               | 9.73            | -2.61             | 1.8E-06        | COL1A2     | 9.62            | -1.65             | 1.5E-03        |
| COL3A1             | 10.07           | -2.52             | 7.7E-07        | PRKCA      | 9.30            | -1.65             | 3.6E-03        |
| RAB8B              | 8.61            | -2.50             | 8.6E-05        | AHNAK      | 11.97           | -1.64             | 2.6E-04        |
| TPM4               | 10.62           | -2.49             | 6.4E-07        | SNX18      | 8.94            | -1.61             | 7.8E-03        |
| FTL                | 8.93            | -2.47             | 8.2E-05        | MAOB       | 9.47            | -1.56             | 5.5E-03        |
| PNP                | 9.25            | -2.45             | 2.8E-05        | HEPH       | 9.40            | -1.56             | 5.5E-03        |
| TAGLN2             | 10.33           | -2.44             | 1.0E-06        | FSCN1      | 10.96           | -1.55             | 5.3E-04        |
| CLDN6              | 9.07            | -2.41             | 1.2E-04        | COL5A1     | 9.11            | -1.55             | 1.0E-02        |
| FLNA               | 11.08           | -2.36             | 2.6E-07        | HSPG2      | 10.06           | -1.54             | 2.0E-03        |
| COL1A1             | 9.98            | -2.33             | 4.6E-06        | ASS1       | 10.53           | -1.51             | 1.8E-03        |
| LAMB1              | 9.34            | -2.32             | 7.1E-05        | IKBIP      | 8.26            | -1.51             | 1.4E-02        |
| COL6A3             | 10.11           | -2.31             | 5.3E-06        | CGNL1      | 8.50            | -1.50             | 1.5E-02        |
| RCN3               | 9.11            | -2.31             | 2.2E-04        | GAK        | 9.09            | -1.50             | 1.3E-02        |
| COL15A1            | 8.65            | -2.30             | 2.7E-04        | ANKRD50    | 8.17            | -1.49             | 1.5E-02        |
| MST4               | 9.03            | -2.29             | 2.5E-04        | GUCY1A3    | 9.11            | -1.47             | 1.4E-02        |
| NDRG1              | 9.57            | -2.25             | 2.9E-05        | DSG1       | 7.93            | -1.45             | 1.8E-02        |
| TPM3;DKFZp686J1372 | 9.43            | -2.24             | 1.2E-04        | ITGA1      | 7.97            | -1.44             | 1.8E-02        |
| NAV1               | 9.66            | -2.23             | 3.4E-05        | FAM114A1   | 9.55            | -1.44             | 4.9E-03        |
| COTL1              | 10.06           | -2.23             | 1.1E-05        | KIF21A     | 9.22            | -1.43             | 1.0E-02        |
| MYH9               | 11.55           | -2.21             | 1.4E-06        | ABRACL     | 9.23            | -1.42             | 1.1E-02        |
| CAPZB              | 9.13            | -2.20             | 4.2E-04        | LTBP1      | 8.44            | -1.41             | 2.1E-02        |
| SLC1A3             | 8.58            | -2.20             | 5.0E-04        | MGP        | 8.49            | -1.37             | 2.4E-02        |
| LMCD1              | 9.13            | -2.17             | 5.0E-04        | RCSD1      | 9.92            | -1.37             | 5.6E-03        |
| GPNMB              | 8.60            | -2.16             | 6.2E-04        | FAM129B    | 9.55            | -1.35             | 7.5E-03        |
| ARPC1B             | 9.94            | -2.15             | 2.2E-05        | LAMA4      | 8.49            | -1.35             | 2.6E-02        |
| ACTB               | 9.50            | -2.15             | 2.1E-04        | COL6A2     | 9.27            | -1.35             | 1.5E-02        |
| CNTN1              | 7.98            | -2.15             | 6.7E-04        | PPP3CA     | 10.09           | -1.34             | 6.3E-03        |
| THY1               | 9.43            | -2.13             | 2.3E-04        | MYL6       | 10.59           | -1.34             | 5.0E-03        |
| ACTG1              | 11.52           | -2.11             | 3.6E-06        | PPL        | 8.95            | -1.34             | 2.4E-02        |
| ACTA1              | 8.82            | -2.11             | 8.1E-04        | ACLY       | 9.83            | -1.33             | 6.9E-03        |
| ENPEP              | 8.20            | -2.10             | 8.8E-04        | PLOD2      | 9.55            | -1.33             | 8.5E-03        |
| DHX40              | 9.75            | -2.09             | 9.7E-05        | MYL12A/B   | 9.88            | -1.32             | 7.4E-03        |
| MYLK3              | 9.78            | -2.07             | 1.1E-04        | PLCXD3     | 10.48           | -1.30             | 6.5E-03        |
| PYGL               | 11.07           | -2.06             | 6.1E-06        | FGF1       | 9.14            | -1.29             | 2.9E-02        |
| CYGB               | 8.34            | -2.04             | 1.2E-03        | CAP1       | 10.48           | -1.27             | 7.4E-03        |
| S100A11            | 9.69            | -2.04             | 1.3E-04        | SORBS2     | 9.42            | -1.27             | 2.0E-02        |
| ARHGDIB            | 9.69            | -2.03             | 1.4E-04        | ISG15      | 9.40            | -1.27             | 2.1E-02        |
| PHLDB2             | 8.85            | -1.97             | 1.6E-03        | S100A10    | 10.36           | -1.26             | 8.0E-03        |
| FGF12;FGF14        | 8.91            | -1.95             | 1.5E-03        | XIRP1      | 10.67           | -1.24             | 4.9E-03        |
| DLGAP4             | 8.64            | -1.95             | 1.9E-03        | RAI14      | 10.08           | -1.22             | 1.2E-02        |
| ASNS               | 9.32            | -1.94             | 7.5E-04        | NDUFA4L2   | 8.66            | -1.22             | 4.3E-02        |
| CALD1              | 10.37           | -1.92             | 9.3E-05        | APOE       | 9.95            | -1.20             | 1.4E-02        |
| FABP5              | 10.93           | -1.92             | 2.4E-05        | BIN1       | 9.10            | -1.20             | 4.1E-02        |
| HSPB2              | 10.42           | -1.91             | 1.0E-04        | PGK2       | 9.63            | -1.19             | 1.6E-02        |
| POTEE;POTEF;POTEJ  | 10.20           | -1.91             | 1.0E-04        | TLN2       | 10.72           | -1.19             | 6.8E-03        |

|                      |       |       |                |          |       |       |                |
|----------------------|-------|-------|----------------|----------|-------|-------|----------------|
| ANXA2;ANXA2P2        | 11.79 | -1.18 | <b>7.1E-03</b> | AGRN     | 8.80  | -0.92 | 1.1E-01        |
| TTC27                | 8.18  | -1.17 | 5.0E-02        | PGM2     | 9.86  | -0.92 | 5.4E-02        |
| AHNAK2               | 10.08 | -1.17 | <b>1.6E-02</b> | TSC22D2  | 9.85  | -0.92 | 5.4E-02        |
| COL18A1              | 9.98  | -1.17 | <b>1.6E-02</b> | LIMS2    | 9.09  | -0.92 | 1.0E-01        |
| HECW2                | 8.50  | -1.17 | 5.1E-02        | CCDC40   | 9.03  | -0.91 | 1.0E-01        |
| TNS1                 | 9.83  | -1.17 | <b>1.7E-02</b> | PSPH     | 9.86  | -0.91 | 5.6E-02        |
| PRKAG1               | 9.84  | -1.15 | <b>1.8E-02</b> | PAWR     | 8.87  | -0.91 | 1.1E-01        |
| PSMG1                | 9.23  | -1.15 | <b>3.3E-02</b> | PTGIS    | 9.43  | -0.91 | 8.2E-02        |
| UBE2E2;UBE2E3;UBE2E1 | 9.12  | -1.15 | <b>4.8E-02</b> | SH3BGRL3 | 10.01 | -0.91 | 5.7E-02        |
| METAP1               | 9.73  | -1.15 | <b>2.0E-02</b> | PIN4     | 9.13  | -0.90 | 1.1E-01        |
| ANXA3                | 11.33 | -1.15 | <b>8.7E-03</b> | MAP4     | 11.72 | -0.90 | <b>3.5E-02</b> |
| LXN                  | 9.15  | -1.14 | <b>4.9E-02</b> | FTH1     | 9.92  | -0.89 | 6.0E-02        |
| NDRG3                | 9.38  | -1.14 | <b>3.5E-02</b> | SLC2A1   | 10.06 | -0.89 | 6.1E-02        |
| GUCY1B3              | 9.52  | -1.14 | <b>2.0E-02</b> | ZYX      | 10.40 | -0.89 | 5.1E-02        |
| COL14A1              | 9.80  | -1.14 | <b>2.0E-02</b> | DYNLT3   | 9.04  | -0.89 | 1.1E-01        |
| UCHL1                | 10.14 | -1.14 | <b>1.9E-02</b> | STXBP6   | 9.26  | -0.89 | 8.8E-02        |
| SPARC                | 9.27  | -1.13 | <b>3.6E-02</b> | FHL1     | 11.22 | -0.88 | <b>3.8E-02</b> |
| RAB6B                | 9.46  | -1.13 | <b>3.6E-02</b> | ADH5     | 11.13 | -0.88 | <b>3.8E-02</b> |
| VAT1                 | 10.45 | -1.13 | <b>1.6E-02</b> | UBE2H    | 9.57  | -0.88 | 6.0E-02        |
| SORBS2               | 8.80  | -1.12 | 6.0E-02        | P4HA2    | 10.35 | -0.87 | 5.5E-02        |
| LGALS1               | 10.64 | -1.11 | <b>1.1E-02</b> | WASF2    | 9.64  | -0.87 | 6.2E-02        |
| COL6A1               | 10.12 | -1.11 | <b>2.2E-02</b> | TP53I3   | 9.81  | -0.86 | 6.4E-02        |
| SDCBP                | 9.57  | -1.10 | <b>2.4E-02</b> | UBE2G1   | 9.37  | -0.86 | 9.7E-02        |
| PPP3R1;HZGJ          | 9.61  | -1.10 | <b>2.4E-02</b> | SEPT2    | 11.01 | -0.86 | <b>4.3E-02</b> |
| DIAPH1               | 9.68  | -1.09 | <b>2.5E-02</b> | MLIP     | 8.63  | -0.86 | 1.4E-01        |
| TWF2                 | 9.20  | -1.08 | <b>4.5E-02</b> | UXT      | 8.57  | -0.85 | 1.4E-01        |
| ARG1                 | 8.84  | -1.08 | 6.9E-02        | MAPRE2   | 9.98  | -0.85 | 7.1E-02        |
| TNKS1BP1             | 9.17  | -1.08 | 6.2E-02        | GCN1L1   | 10.33 | -0.85 | 6.0E-02        |
| TLN1                 | 11.19 | -1.07 | <b>1.4E-02</b> | PGK1     | 12.20 | -0.85 | <b>4.5E-02</b> |
| RPS6KA3              | 9.58  | -1.07 | <b>2.8E-02</b> | EIF4A1   | 10.41 | -0.85 | 6.1E-02        |
| GPD1L                | 10.42 | -1.06 | <b>2.3E-02</b> | GAB1     | 9.10  | -0.85 | 1.3E-01        |
| UGDH                 | 9.89  | -1.06 | <b>2.9E-02</b> | TKT      | 10.87 | -0.85 | <b>4.5E-02</b> |
| HSPB6                | 11.36 | -1.05 | <b>1.5E-02</b> | PTPN12   | 8.56  | -0.84 | 1.4E-01        |
| LRRFIP1              | 8.61  | -1.05 | 7.5E-02        | CHN1     | 9.10  | -0.84 | 1.3E-01        |
| LEPRE1               | 9.66  | -1.05 | <b>3.0E-02</b> | HDAC6    | 9.06  | -0.84 | 1.3E-01        |
| WARS                 | 10.48 | -1.05 | <b>2.4E-02</b> | GARS     | 10.61 | -0.84 | 6.3E-02        |
| PP1R9B               | 9.61  | -1.05 | <b>3.0E-02</b> | GAPVD1   | 9.54  | -0.84 | 6.9E-02        |
| FKBP15               | 9.12  | -1.05 | 6.8E-02        | CPPED1   | 9.19  | -0.84 | 1.3E-01        |
| DPYSL5               | 9.86  | -1.04 | <b>3.1E-02</b> | SORBS2   | 11.02 | -0.84 | <b>4.7E-02</b> |
| ITGA5                | 8.69  | -1.04 | 7.7E-02        | PGM3     | 10.05 | -0.84 | 7.6E-02        |
| SNX24                | 8.58  | -1.04 | 7.9E-02        | ANKFY1   | 9.68  | -0.84 | 6.9E-02        |
| NFKB2                | 9.13  | -1.03 | 7.2E-02        | KPRP     | 7.74  | -0.83 | 1.5E-01        |
| CYFIP1               | 9.88  | -1.02 | <b>3.4E-02</b> | CHORDC1  | 9.49  | -0.83 | 1.1E-01        |
| PPF1BP1              | 9.67  | -1.01 | <b>3.5E-02</b> | TXNDC9   | 8.98  | -0.83 | 1.3E-01        |
| CAST                 | 10.24 | -1.01 | <b>2.9E-02</b> | ZNF259   | 8.48  | -0.83 | 1.5E-01        |
| TPM3                 | 10.34 | -1.01 | <b>2.9E-02</b> | NAMPT    | 10.51 | -0.82 | 6.9E-02        |
| PDLIM1               | 10.78 | -1.01 | <b>1.9E-02</b> | MYH10    | 11.08 | -0.82 | 5.2E-02        |
| MYO1E                | 9.10  | -1.00 | 7.9E-02        | KIAA0196 | 9.51  | -0.82 | 1.1E-01        |
| GFPT1                | 10.13 | -0.99 | <b>3.9E-02</b> | SELENBP1 | 10.25 | -0.81 | 7.1E-02        |
| LLGL2                | 8.80  | -0.99 | 9.1E-02        | GNL1     | 8.66  | -0.81 | 1.5E-01        |
| PMM2                 | 9.42  | -0.99 | 6.2E-02        | GYG1     | 9.23  | -0.81 | 1.1E-01        |
| GPHN                 | 9.52  | -0.98 | <b>3.9E-02</b> | APOBEC2  | 10.83 | -0.81 | 5.4E-02        |
| ACTN4                | 9.28  | -0.98 | 6.4E-02        | TUBA4A   | 10.63 | -0.81 | 5.5E-02        |
| PPP2R5C              | 8.44  | -0.98 | 9.5E-02        | XPOT     | 9.30  | -0.81 | 1.2E-01        |
| ITSN2                | 8.40  | -0.98 | 9.6E-02        | PPIP5K2  | 8.35  | -0.81 | 1.6E-01        |
| KPNA2                | 9.12  | -0.97 | 8.6E-02        | PXDN     | 9.45  | -0.80 | 1.2E-01        |
| ARHGEF2              | 9.65  | -0.97 | <b>4.2E-02</b> | XPO4     | 9.94  | -0.80 | 8.8E-02        |
| TWF1                 | 9.14  | -0.96 | 8.9E-02        | MARCKS   | 10.44 | -0.80 | 7.4E-02        |
| PYCR1                | 9.63  | -0.95 | <b>4.5E-02</b> | ATOX1    | 9.05  | -0.80 | 1.5E-01        |
| CRTAP                | 9.35  | -0.95 | 7.2E-02        | PLCL2    | 9.66  | -0.80 | 8.0E-02        |
| EML4                 | 8.88  | -0.94 | 9.5E-02        | SH3PXD2A | 8.42  | -0.80 | 1.6E-01        |
| AKAP13               | 10.06 | -0.94 | <b>4.9E-02</b> | CASP7    | 8.74  | -0.79 | 1.6E-01        |
| SEPT9                | 10.90 | -0.94 | <b>2.8E-02</b> | TGFB1I1  | 10.02 | -0.79 | 9.3E-02        |
| ACOT7                | 8.83  | -0.94 | 1.1E-01        | PLOD1    | 10.26 | -0.78 | 8.1E-02        |
| CYTH2;CYTH1;CYTH3    | 8.59  | -0.94 | 1.1E-01        | CLIC1    | 10.78 | -0.78 | 6.2E-02        |
| MALT1                | 8.02  | -0.93 | 1.1E-01        | CDC34    | 8.58  | -0.78 | 1.7E-01        |
| ABCF3                | 8.53  | -0.93 | 1.1E-01        | GLUL     | 9.05  | -0.78 | 1.5E-01        |
| TANC1                | 9.22  | -0.93 | 7.6E-02        | PFKP     | 12.18 | -0.78 | 6.3E-02        |
| SEC24D               | 9.20  | -0.93 | 7.6E-02        | MVB12B   | 8.53  | -0.78 | 1.7E-01        |
| VCAN                 | 8.98  | -0.92 | 1.0E-01        | PPM1G    | 9.22  | -0.77 | 1.3E-01        |
| NT5C2                | 10.04 | -0.92 | 5.3E-02        | CLTA     | 9.60  | -0.77 | 8.9E-02        |
| RECQL                | 9.29  | -0.92 | 7.9E-02        | DCTPP1   | 8.95  | -0.76 | 1.6E-01        |



|                                  |       |       |         |                      |       |       |         |
|----------------------------------|-------|-------|---------|----------------------|-------|-------|---------|
| PHLDB1                           | 9.11  | -0.76 | 1.6E-01 | PCK2                 | 9.19  | -0.65 | 2.1E-01 |
| BROX                             | 9.48  | -0.76 | 1.3E-01 | PAFAH1B2             | 10.21 | -0.65 | 1.3E-01 |
| SYAP1                            | 8.81  | -0.75 | 1.8E-01 | IKBKAP               | 9.45  | -0.64 | 1.9E-01 |
| VCL                              | 11.93 | -0.75 | 7.1E-02 | HSP90AB1             | 11.67 | -0.64 | 1.1E-01 |
| RTCA                             | 9.57  | -0.75 | 9.5E-02 | GGCT                 | 10.02 | -0.64 | 1.6E-01 |
| A0A096LP25;A0A096LNZ0;<br>Q6ZSR9 | 9.03  | -0.75 | 1.7E-01 | MVP                  | 10.16 | -0.64 | 1.6E-01 |
| TSC22D3                          | 9.35  | -0.75 | 1.4E-01 | FLII                 | 10.00 | -0.64 | 1.6E-01 |
| SH3BGR                           | 10.32 | -0.75 | 9.2E-02 | FNTB;CHURC1-FNTB     | 9.36  | -0.64 | 1.9E-01 |
| ARL2BP                           | 8.94  | -0.75 | 1.7E-01 | CPVL                 | 10.61 | -0.64 | 1.4E-01 |
| PEA15                            | 10.30 | -0.75 | 9.3E-02 | THOP1                | 9.61  | -0.64 | 1.4E-01 |
| ABI2                             | 8.54  | -0.75 | 1.9E-01 | ROCK2                | 9.85  | -0.64 | 1.6E-01 |
| SDK2                             | 8.06  | -0.74 | 1.9E-01 | NCKAP1               | 10.53 | -0.64 | 1.4E-01 |
| CRYAB                            | 11.96 | -0.74 | 7.4E-02 | IFITM3;IFITM2;IFITM1 | 9.68  | -0.63 | 1.4E-01 |
| LAMC1                            | 9.96  | -0.74 | 1.1E-01 | RNF213               | 9.13  | -0.63 | 2.3E-01 |
| HBS1L                            | 8.53  | -0.73 | 1.9E-01 | MAPKAPK3             | 8.53  | -0.63 | 2.5E-01 |
| DIP2B                            | 9.45  | -0.73 | 1.4E-01 | NUDCD1               | 9.09  | -0.62 | 2.3E-01 |
| FBXL18                           | 8.60  | -0.73 | 1.9E-01 | ISOC1                | 11.18 | -0.62 | 1.2E-01 |
| VPS4B                            | 8.99  | -0.73 | 1.8E-01 | SERPINH1             | 11.31 | -0.62 | 1.2E-01 |
| ZNF622                           | 8.24  | -0.73 | 1.9E-01 | TARS                 | 10.21 | -0.62 | 1.5E-01 |
| ENO1                             | 12.44 | -0.73 | 7.9E-02 | PPME1                | 9.79  | -0.62 | 1.5E-01 |
| PARVA                            | 10.38 | -0.72 | 1.0E-01 | ACACA                | 8.86  | -0.61 | 2.4E-01 |
| REPS1                            | 8.79  | -0.72 | 2.0E-01 | MAP2K1               | 10.13 | -0.61 | 1.8E-01 |
| CASP3                            | 9.98  | -0.72 | 1.2E-01 | IPO9                 | 10.15 | -0.61 | 1.8E-01 |
| CD2AP                            | 8.91  | -0.72 | 1.8E-01 | IPO4                 | 8.53  | -0.61 | 2.6E-01 |
| RPAP1                            | 10.35 | -0.72 | 1.0E-01 | PTK2                 | 8.93  | -0.61 | 2.4E-01 |
| FOCAD                            | 8.62  | -0.72 | 2.0E-01 | AAK1                 | 9.27  | -0.61 | 2.1E-01 |
| CYFIP2                           | 10.41 | -0.72 | 1.0E-01 | PKN1                 | 8.50  | -0.61 | 2.6E-01 |
| PTPN11                           | 10.14 | -0.71 | 1.2E-01 | UBAC1                | 8.73  | -0.60 | 2.6E-01 |
| SERPINB9                         | 9.90  | -0.71 | 1.2E-01 | CSR2                 | 9.55  | -0.60 | 1.6E-01 |
| PGM2L1                           | 9.46  | -0.71 | 1.5E-01 | COMMD4               | 9.32  | -0.60 | 2.1E-01 |
| AEBP1                            | 8.79  | -0.71 | 2.0E-01 | DYSF                 | 10.02 | -0.60 | 1.8E-01 |
| FKBP7                            | 8.88  | -0.71 | 1.9E-01 | P4HA1                | 10.60 | -0.60 | 1.6E-01 |
| SWAP70                           | 9.35  | -0.71 | 1.6E-01 | EIF5B                | 9.98  | -0.60 | 1.9E-01 |
| ANTXR2                           | 9.00  | -0.70 | 1.9E-01 | GALE                 | 9.97  | -0.60 | 1.9E-01 |
| SPATA5                           | 8.30  | -0.70 | 2.1E-01 | PGD                  | 11.07 | -0.60 | 1.4E-01 |
| PDLIM5                           | 9.52  | -0.70 | 1.6E-01 | SH3GLB1              | 10.46 | -0.60 | 1.6E-01 |
| PLOD3                            | 9.31  | -0.70 | 1.6E-01 | CRK                  | 9.33  | -0.59 | 2.2E-01 |
| VARS                             | 10.33 | -0.70 | 1.1E-01 | HEMK2;N6AMT1         | 8.65  | -0.59 | 2.7E-01 |
| ARF4                             | 10.45 | -0.70 | 1.1E-01 | HDCC2                | 9.39  | -0.59 | 2.2E-01 |
| KIAA1279                         | 8.58  | -0.69 | 2.1E-01 | MYH14                | 10.17 | -0.59 | 1.7E-01 |
| ABI1                             | 9.42  | -0.69 | 1.6E-01 | PPP4R1               | 9.00  | -0.59 | 2.5E-01 |
| OSTF1                            | 9.11  | -0.69 | 1.9E-01 | CCDC6                | 9.81  | -0.59 | 1.6E-01 |
| PTPN9                            | 8.39  | -0.69 | 2.1E-01 | NAGLU                | 8.76  | -0.58 | 2.8E-01 |
| PFKL                             | 10.78 | -0.69 | 9.3E-02 | KIAA1033             | 9.38  | -0.58 | 2.2E-01 |
| PHGDH                            | 11.11 | -0.69 | 9.3E-02 | MYH13                | 10.81 | -0.58 | 1.5E-01 |
| CRABP2                           | 10.96 | -0.69 | 9.4E-02 | SRM                  | 9.28  | -0.58 | 2.2E-01 |
| RNASET2                          | 9.78  | -0.69 | 1.2E-01 | UNC45B               | 11.37 | -0.58 | 1.5E-01 |
| HSPH1                            | 9.93  | -0.69 | 1.4E-01 | URM1                 | 8.89  | -0.58 | 2.6E-01 |
| CPNE3                            | 10.53 | -0.69 | 1.2E-01 | CCDC93               | 8.81  | -0.58 | 2.8E-01 |
| TSC22D1                          | 9.16  | -0.69 | 2.0E-01 | SOS1                 | 8.12  | -0.58 | 2.8E-01 |
| ANXA5                            | 11.78 | -0.69 | 9.5E-02 | FABP3                | 12.08 | -0.57 | 1.5E-01 |
| ATXN7L3B                         | 8.54  | -0.68 | 2.2E-01 | PTMA                 | 9.06  | -0.57 | 2.6E-01 |
| RICTOR                           | 9.17  | -0.68 | 2.0E-01 | CPQ                  | 9.29  | -0.57 | 2.3E-01 |
| ARHGAP35;GRLF1                   | 8.72  | -0.68 | 2.2E-01 | PPID                 | 9.48  | -0.57 | 2.3E-01 |
| KIF13A                           | 9.57  | -0.68 | 1.2E-01 | AKT1                 | 9.35  | -0.57 | 2.3E-01 |
| ATL3                             | 8.90  | -0.68 | 2.0E-01 | PHYHD1               | 9.44  | -0.57 | 2.3E-01 |
| STAT1                            | 10.23 | -0.68 | 1.2E-01 | GART                 | 10.10 | -0.57 | 2.1E-01 |
| CARS                             | 9.40  | -0.68 | 1.7E-01 | PLCG1                | 9.04  | -0.56 | 2.7E-01 |
| CDK6                             | 9.23  | -0.68 | 1.7E-01 | VPS13C               | 9.86  | -0.56 | 2.1E-01 |
| TTC38                            | 8.62  | -0.68 | 2.2E-01 | EIF4EBP1             | 8.83  | -0.56 | 2.9E-01 |
| PLCL1                            | 9.66  | -0.68 | 1.2E-01 | SEPT10               | 10.35 | -0.56 | 1.8E-01 |
| CNN2                             | 9.69  | -0.67 | 1.2E-01 | C9orf64              | 9.64  | -0.56 | 1.8E-01 |
| COMMD8                           | 9.11  | -0.67 | 2.0E-01 | CHMP4B               | 9.89  | -0.56 | 2.1E-01 |
| HNRNPC                           | 8.93  | -0.67 | 2.1E-01 | ARHGDI8              | 10.74 | -0.56 | 1.6E-01 |
| UTRN                             | 10.35 | -0.66 | 1.3E-01 | HSP90AB2P            | 10.24 | -0.56 | 1.9E-01 |
| ICAM1                            | 8.72  | -0.66 | 2.3E-01 | CHMP1B               | 9.13  | -0.55 | 2.7E-01 |
| PYGM                             | 10.96 | -0.66 | 1.1E-01 | MAGED2               | 10.43 | -0.55 | 1.9E-01 |
| MIF4GD                           | 8.84  | -0.66 | 2.3E-01 | DNAJB4               | 8.63  | -0.55 | 3.0E-01 |
| PACS1                            | 9.95  | -0.66 | 1.5E-01 | STAMBPL1             | 9.49  | -0.55 | 2.5E-01 |
| RPS4Y1                           | 8.99  | -0.65 | 2.1E-01 | EPS15                | 9.23  | -0.55 | 2.5E-01 |
| TTC37                            | 9.82  | -0.65 | 1.5E-01 | COMMD3;BMI1          | 9.51  | -0.55 | 2.5E-01 |
|                                  |       |       |         | BZW1                 | 9.84  | -0.54 | 2.2E-01 |

|              |       |       |         |                                |       |       |         |
|--------------|-------|-------|---------|--------------------------------|-------|-------|---------|
| SEC31A       | 10.35 | -0.54 | 2.0E-01 | COPG1                          | 10.41 | -0.48 | 2.4E-01 |
| DAB2IP       | 8.65  | -0.54 | 3.1E-01 | SCRN2                          | 9.77  | -0.48 | 2.2E-01 |
| UBXN7        | 8.78  | -0.54 | 3.1E-01 | SNW1                           | 9.01  | -0.48 | 3.3E-01 |
| USP15        | 9.43  | -0.54 | 2.5E-01 | SLK                            | 10.32 | -0.48 | 2.4E-01 |
| GPI          | 12.08 | -0.54 | 1.7E-01 | LYPLA2                         | 9.94  | -0.48 | 2.7E-01 |
| RCC2         | 9.17  | -0.54 | 2.8E-01 | VPS35                          | 10.50 | -0.48 | 2.4E-01 |
| PPP2CB       | 8.97  | -0.54 | 2.8E-01 | APRT                           | 10.14 | -0.48 | 2.7E-01 |
| CDK2;CDK3    | 8.86  | -0.54 | 2.8E-01 | TRIP10                         | 8.86  | -0.47 | 3.3E-01 |
| PDCD10       | 10.12 | -0.54 | 2.2E-01 | MROH1                          | 9.24  | -0.47 | 3.0E-01 |
| COMMD2       | 9.34  | -0.54 | 2.5E-01 | CSK                            | 9.45  | -0.47 | 3.0E-01 |
| CBFB         | 8.99  | -0.54 | 2.9E-01 | SRP54                          | 9.61  | -0.47 | 2.3E-01 |
| RGL1         | 8.86  | -0.54 | 2.9E-01 | NRBP1                          | 10.43 | -0.47 | 2.5E-01 |
| PACSIN3      | 9.75  | -0.54 | 1.9E-01 | NUP214                         | 8.68  | -0.47 | 3.6E-01 |
| LDHA         | 12.45 | -0.53 | 1.8E-01 | TRIOBP                         | 9.90  | -0.47 | 2.8E-01 |
| EXOC6B       | 9.48  | -0.53 | 2.5E-01 | UBR4                           | 10.48 | -0.47 | 2.5E-01 |
| CD63         | 9.37  | -0.53 | 2.5E-01 | LMNA                           | 9.76  | -0.47 | 2.3E-01 |
| TBC1D15      | 9.63  | -0.53 | 1.9E-01 | PFN2                           | 10.48 | -0.47 | 2.5E-01 |
| FKBP10       | 10.20 | -0.53 | 2.0E-01 | ARPC5                          | 10.34 | -0.47 | 2.5E-01 |
| PPM1F        | 9.28  | -0.53 | 2.6E-01 | SEPT7                          | 11.15 | -0.47 | 2.2E-01 |
| TPD52;MRPS28 | 8.78  | -0.53 | 3.2E-01 | DHX36                          | 9.07  | -0.47 | 3.4E-01 |
| FNTA         | 9.35  | -0.53 | 2.6E-01 | TBCD                           | 9.98  | -0.46 | 2.8E-01 |
| UBA6         | 10.16 | -0.53 | 2.3E-01 | EIF1                           | 9.96  | -0.46 | 2.8E-01 |
| MTMR2        | 8.45  | -0.53 | 3.2E-01 | GDI2                           | 11.20 | -0.46 | 2.3E-01 |
| LAMP2        | 10.11 | -0.53 | 2.4E-01 | REXO2                          | 9.57  | -0.46 | 2.3E-01 |
| FERMT2       | 10.75 | -0.52 | 1.8E-01 | UBQLN1                         | 9.61  | -0.46 | 2.4E-01 |
| STK39        | 10.28 | -0.52 | 2.1E-01 | AP3M1                          | 9.38  | -0.46 | 3.1E-01 |
| PPP2R3A      | 8.72  | -0.52 | 3.2E-01 | NAA25                          | 9.23  | -0.46 | 3.1E-01 |
| ISYNA1       | 10.87 | -0.52 | 1.9E-01 | WBP2                           | 9.00  | -0.46 | 3.4E-01 |
| RCN1         | 10.23 | -0.52 | 2.1E-01 | BOLA2;BOLA2B;LOC101060252      | 9.83  | -0.46 | 2.9E-01 |
| MEMO1        | 9.13  | -0.51 | 3.0E-01 | MOB1A;MOB1B                    | 9.58  | -0.46 | 2.4E-01 |
| NUTF2        | 10.77 | -0.51 | 1.9E-01 | PELO                           | 8.99  | -0.45 | 3.4E-01 |
| TSC22D4      | 9.22  | -0.51 | 2.7E-01 | YWHAH                          | 11.01 | -0.45 | 2.4E-01 |
| MLLT4        | 9.59  | -0.51 | 2.0E-01 | BRK1                           | 9.51  | -0.45 | 3.1E-01 |
| ITGB1BP2     | 9.78  | -0.51 | 2.0E-01 | MTOR                           | 9.83  | -0.45 | 2.9E-01 |
| GGPS1        | 9.43  | -0.51 | 2.7E-01 | AARS                           | 10.80 | -0.45 | 2.4E-01 |
| ABHD14B      | 9.51  | -0.51 | 2.7E-01 | GLRX3                          | 10.30 | -0.45 | 2.6E-01 |
| NME1         | 10.06 | -0.51 | 2.5E-01 | CORO1B                         | 9.00  | -0.45 | 3.5E-01 |
| DPP3         | 10.07 | -0.51 | 2.5E-01 | PRRC1                          | 9.25  | -0.45 | 3.1E-01 |
| SCYL1        | 8.63  | -0.51 | 3.3E-01 | XPO5                           | 8.91  | -0.45 | 3.5E-01 |
| EIF4G1       | 10.35 | -0.51 | 2.2E-01 | LRP1                           | 9.96  | -0.45 | 3.0E-01 |
| ARIH2        | 9.22  | -0.51 | 2.7E-01 | UBE2L3                         | 10.63 | -0.45 | 2.7E-01 |
| RAP1GDS1     | 10.33 | -0.51 | 2.2E-01 | SEPT11                         | 10.75 | -0.45 | 2.4E-01 |
| CDV3         | 9.84  | -0.51 | 2.5E-01 | C17orf49;BAP18;RNASEK-C17orf49 | 9.11  | -0.45 | 3.5E-01 |
| ALPK3        | 9.00  | -0.51 | 3.1E-01 | ARIH1                          | 8.85  | -0.44 | 3.8E-01 |
| DNAJC7       | 9.67  | -0.51 | 2.1E-01 | TAGLN                          | 11.24 | -0.44 | 2.4E-01 |
| L3HYPDH      | 9.06  | -0.51 | 3.1E-01 | WASL                           | 9.42  | -0.44 | 3.2E-01 |
| GSTP1        | 11.50 | -0.51 | 2.0E-01 | SRP68                          | 9.94  | -0.44 | 3.0E-01 |
| KANK2        | 10.22 | -0.51 | 2.2E-01 | TPT1                           | 10.82 | -0.44 | 2.5E-01 |
| C16orf80     | 9.18  | -0.51 | 3.1E-01 | STARD7                         | 8.64  | -0.44 | 3.8E-01 |
| HDLBP        | 10.26 | -0.50 | 2.2E-01 | NANS                           | 9.84  | -0.44 | 3.1E-01 |
| TOM1L2       | 9.50  | -0.50 | 2.7E-01 | CHMP1A                         | 9.36  | -0.44 | 3.2E-01 |
| PSMD9        | 9.80  | -0.50 | 2.1E-01 | SNX1                           | 9.80  | -0.44 | 2.5E-01 |
| COG6         | 8.98  | -0.50 | 3.1E-01 | SNX3                           | 10.16 | -0.44 | 3.1E-01 |
| SORBS1       | 8.67  | -0.50 | 3.4E-01 | NUDC                           | 10.36 | -0.44 | 2.7E-01 |
| NEK7         | 10.18 | -0.50 | 2.3E-01 | AP3B1                          | 9.94  | -0.44 | 3.1E-01 |
| EGLN1        | 8.66  | -0.50 | 3.4E-01 | VPS26A                         | 9.93  | -0.43 | 3.1E-01 |
| DST          | 9.64  | -0.49 | 2.1E-01 | XPNPEP1                        | 10.57 | -0.43 | 2.8E-01 |
| AKR1B1       | 11.79 | -0.49 | 2.0E-01 | HERC4                          | 9.40  | -0.43 | 3.2E-01 |
| DCTD         | 9.16  | -0.49 | 3.2E-01 | MON2                           | 8.89  | -0.43 | 3.6E-01 |
| GCLC         | 9.13  | -0.49 | 3.2E-01 | FAM21A;FAM21B;FAM21C           | 8.84  | -0.43 | 3.9E-01 |
| ENO3         | 11.59 | -0.49 | 2.1E-01 | EFTUD1                         | 9.47  | -0.43 | 3.3E-01 |
| RSU1         | 10.50 | -0.49 | 2.3E-01 | RRBP1                          | 9.71  | -0.43 | 2.5E-01 |
| ROCK1        | 10.09 | -0.49 | 2.6E-01 | CYP2J2                         | 9.15  | -0.43 | 3.6E-01 |
| IKBKB        | 8.38  | -0.49 | 3.5E-01 | RNF123                         | 9.19  | -0.43 | 3.6E-01 |
| CLIP1        | 9.04  | -0.49 | 3.2E-01 | STK24                          | 9.70  | -0.43 | 2.6E-01 |
| COPA         | 10.80 | -0.48 | 2.1E-01 | DDX19B;DDX19A                  | 8.49  | -0.43 | 3.9E-01 |
| MYO6         | 8.60  | -0.48 | 3.5E-01 | DNAJA1                         | 10.17 | -0.43 | 3.1E-01 |
| KANK1        | 8.49  | -0.48 | 3.5E-01 | CLIC4                          | 11.31 | -0.43 | 2.5E-01 |
| HN1L         | 8.56  | -0.48 | 3.5E-01 | EXOC7                          | 9.72  | -0.43 | 2.6E-01 |
| ERO1L        | 10.45 | -0.48 | 2.4E-01 | RANBP1                         | 10.19 | -0.43 | 2.8E-01 |
| OBSL1        | 9.99  | -0.48 | 2.7E-01 |                                |       |       |         |
| ANXA4        | 10.38 | -0.48 | 2.4E-01 |                                |       |       |         |

|                       |       |       |         |                     |       |       |         |
|-----------------------|-------|-------|---------|---------------------|-------|-------|---------|
| ILK                   | 10.59 | -0.43 | 2.8E-01 | UBAP2               | 8.51  | -0.38 | 4.4E-01 |
| STMN1                 | 11.08 | -0.43 | 2.6E-01 | RABEP1              | 9.29  | -0.38 | 3.7E-01 |
| GSPT1                 | 9.95  | -0.43 | 3.2E-01 | RAN                 | 11.05 | -0.38 | 3.0E-01 |
| FASN                  | 10.65 | -0.43 | 2.6E-01 | CNOT11              | 8.62  | -0.38 | 4.4E-01 |
| DPCD                  | 9.28  | -0.42 | 3.3E-01 | CACYBP              | 10.26 | -0.38 | 3.3E-01 |
| LIMS1                 | 9.76  | -0.42 | 2.6E-01 | DHX57               | 7.91  | -0.37 | 4.4E-01 |
| SKIV2L                | 9.67  | -0.42 | 2.6E-01 | MMS19               | 9.45  | -0.37 | 3.7E-01 |
| EIF5A;EIF5AL1;EIF5A2  | 11.04 | -0.42 | 2.6E-01 | PDLIM5              | 11.37 | -0.37 | 3.1E-01 |
| AKAP12                | 10.26 | -0.42 | 2.9E-01 | PNMA3               | 9.24  | -0.37 | 3.8E-01 |
| MARK3                 | 8.73  | -0.42 | 4.0E-01 | TIGAR               | 8.67  | -0.37 | 4.4E-01 |
| GBF1                  | 9.74  | -0.42 | 2.6E-01 | NDE1;NDEL1          | 8.76  | -0.37 | 4.4E-01 |
| COPB1                 | 10.54 | -0.42 | 2.9E-01 | DDAH2               | 10.65 | -0.37 | 3.1E-01 |
| RPS15A                | 9.19  | -0.42 | 3.7E-01 | TNNC1               | 10.42 | -0.37 | 3.4E-01 |
| HK2                   | 9.81  | -0.42 | 2.6E-01 | EIF2B5              | 9.04  | -0.37 | 4.1E-01 |
| ZC3HAV1L              | 9.71  | -0.42 | 2.7E-01 | IPO11               | 8.88  | -0.37 | 4.1E-01 |
| ASPSCR1               | 8.68  | -0.42 | 4.0E-01 | ACADS               | 10.31 | -0.37 | 3.4E-01 |
| SMPX                  | 9.30  | -0.42 | 3.4E-01 | LASP1               | 10.10 | -0.37 | 3.8E-01 |
| A0A075B730;A0A087X1U6 | 9.94  | -0.42 | 3.3E-01 | ETF1                | 10.01 | -0.36 | 3.8E-01 |
| RTN4                  | 9.17  | -0.41 | 3.8E-01 | SEPT6               | 9.88  | -0.36 | 3.8E-01 |
| EEF2                  | 11.64 | -0.41 | 2.7E-01 | TSC2                | 8.47  | -0.36 | 4.5E-01 |
| TRAF6                 | 8.80  | -0.41 | 4.1E-01 | HSP90AA1            | 12.00 | -0.36 | 3.2E-01 |
| HEATR6                | 7.81  | -0.41 | 4.1E-01 | PTPN23              | 9.33  | -0.36 | 3.8E-01 |
| IST1                  | 10.07 | -0.41 | 3.3E-01 | C12orf57            | 8.73  | -0.36 | 4.5E-01 |
| COMMD1                | 9.06  | -0.41 | 3.8E-01 | EIF2AK4             | 9.63  | -0.36 | 3.1E-01 |
| SPTAN1                | 9.20  | -0.41 | 3.4E-01 | ASMTL               | 9.76  | -0.36 | 3.1E-01 |
| CFL1                  | 11.78 | -0.41 | 2.7E-01 | MBNL1;MBLL;MBNL2    | 9.18  | -0.36 | 4.2E-01 |
| PPP6R1                | 8.81  | -0.41 | 4.1E-01 | GEMIN5              | 8.54  | -0.36 | 4.5E-01 |
| MICAL3                | 9.74  | -0.41 | 2.7E-01 | PSMD5               | 10.27 | -0.36 | 3.4E-01 |
| RAPGEF1               | 8.51  | -0.41 | 4.1E-01 | MCAM                | 9.92  | -0.36 | 3.8E-01 |
| YKT6                  | 9.84  | -0.41 | 3.4E-01 | ID11                | 9.10  | -0.36 | 4.2E-01 |
| SNX6                  | 10.08 | -0.41 | 3.4E-01 | LRRC57              | 9.38  | -0.36 | 3.9E-01 |
| PFAS                  | 10.25 | -0.41 | 3.0E-01 | LRRC40              | 9.54  | -0.36 | 3.1E-01 |
| FLNC                  | 12.46 | -0.41 | 2.8E-01 | UBLCP1              | 9.09  | -0.36 | 4.2E-01 |
| STIP1                 | 11.24 | -0.41 | 2.8E-01 | CNBP                | 9.66  | -0.36 | 3.1E-01 |
| DPP9                  | 9.07  | -0.40 | 3.8E-01 | TP11                | 12.36 | -0.36 | 3.2E-01 |
| TUBB                  | 11.65 | -0.40 | 2.8E-01 | BIRC6               | 9.16  | -0.36 | 4.2E-01 |
| PITPNA                | 10.20 | -0.40 | 3.0E-01 | EXOC4               | 9.83  | -0.36 | 3.8E-01 |
| CALCOCO1              | 8.20  | -0.40 | 4.1E-01 | NUDT1               | 9.21  | -0.36 | 3.9E-01 |
| VPS29                 | 10.12 | -0.40 | 3.4E-01 | TUBB4B              | 12.24 | -0.36 | 3.2E-01 |
| TXN                   | 10.61 | -0.40 | 3.0E-01 | S100A13             | 10.01 | -0.36 | 3.9E-01 |
| PM20D2                | 9.25  | -0.40 | 3.5E-01 | FKBP3               | 10.63 | -0.36 | 3.5E-01 |
| IFI16                 | 8.87  | -0.40 | 3.9E-01 | HGS                 | 9.98  | -0.36 | 3.9E-01 |
| ARAP1                 | 8.17  | -0.40 | 4.2E-01 | COMMD10             | 8.51  | -0.36 | 4.6E-01 |
| TUBA1A;TUBA3C;TUBA3E  | 11.25 | -0.40 | 2.8E-01 | GLMN                | 8.92  | -0.35 | 4.3E-01 |
| DYNC1H1               | 11.85 | -0.40 | 2.8E-01 | FBXO2               | 9.31  | -0.35 | 3.9E-01 |
| TSR1                  | 8.31  | -0.40 | 4.2E-01 | NAA15               | 9.84  | -0.35 | 3.9E-01 |
| NID1                  | 9.27  | -0.40 | 3.5E-01 | STAM                | 9.81  | -0.35 | 3.1E-01 |
| CLASPI                | 9.84  | -0.40 | 3.5E-01 | NRD1                | 8.86  | -0.35 | 4.3E-01 |
| INF2                  | 9.41  | -0.40 | 3.6E-01 | PDE6D               | 9.03  | -0.35 | 4.3E-01 |
| SAE1                  | 9.89  | -0.39 | 3.5E-01 | NME2;NME1-NME2;NME1 | 11.34 | -0.35 | 3.3E-01 |
| TUBA1B                | 12.41 | -0.39 | 2.9E-01 | NUDT5               | 10.36 | -0.35 | 3.5E-01 |
| YWHAG                 | 11.37 | -0.39 | 2.9E-01 | TJPI                | 9.88  | -0.35 | 3.9E-01 |
| IARS                  | 10.65 | -0.39 | 2.9E-01 | ENAH                | 9.75  | -0.35 | 3.2E-01 |
| DENND5B               | 8.96  | -0.39 | 4.0E-01 | NAA10               | 10.16 | -0.35 | 3.9E-01 |
| NMT1                  | 9.69  | -0.39 | 2.9E-01 | TAOK1               | 8.50  | -0.35 | 4.6E-01 |
| LARP1                 | 9.65  | -0.39 | 2.9E-01 | CMPK1               | 10.17 | -0.35 | 3.6E-01 |
| FAM50A                | 9.14  | -0.39 | 4.0E-01 | ELP3                | 9.13  | -0.35 | 4.3E-01 |
| UBE2Z                 | 9.56  | -0.39 | 2.9E-01 | AKT2                | 8.43  | -0.35 | 4.6E-01 |
| SRP72                 | 9.77  | -0.39 | 2.9E-01 | TMX1                | 9.47  | -0.35 | 4.0E-01 |
| PPIC                  | 9.55  | -0.39 | 2.9E-01 | FHIT                | 9.79  | -0.34 | 3.2E-01 |
| SBDS                  | 10.11 | -0.39 | 3.5E-01 | EEF1A1P5;EEF1A1     | 12.19 | -0.34 | 3.4E-01 |
| FBXL8                 | 8.32  | -0.39 | 4.3E-01 | PEF1                | 9.65  | -0.34 | 3.2E-01 |
| HPRT1                 | 10.49 | -0.39 | 3.2E-01 | ENO2                | 11.04 | -0.34 | 3.4E-01 |
| DNAJC9                | 9.15  | -0.39 | 4.0E-01 | C1orf123            | 9.87  | -0.34 | 4.0E-01 |
| HSPA14                | 8.82  | -0.38 | 4.3E-01 | FKBP5               | 9.07  | -0.34 | 4.4E-01 |
| CNOT1                 | 9.65  | -0.38 | 2.9E-01 | C16orf13            | 9.36  | -0.34 | 4.0E-01 |
| ACSS2                 | 9.84  | -0.38 | 3.6E-01 | PARP1               | 10.13 | -0.34 | 4.0E-01 |
| TES                   | 10.11 | -0.38 | 3.6E-01 | ARFGAP1             | 8.95  | -0.34 | 4.4E-01 |
| SLC3A2                | 9.31  | -0.38 | 3.7E-01 | TCEA3               | 8.51  | -0.34 | 4.7E-01 |
| CIAPIN1               | 9.96  | -0.38 | 3.6E-01 | PPP6R3              | 9.62  | -0.34 | 3.3E-01 |
| COMMD6                | 8.88  | -0.38 | 4.0E-01 | SEC13               | 10.20 | -0.34 | 3.7E-01 |
| IRGQ                  | 9.35  | -0.38 | 3.7E-01 | ARPC4;ARPC4-TTL3    | 10.82 | -0.34 | 3.5E-01 |

|             |       |       |         |                     |       |       |         |
|-------------|-------|-------|---------|---------------------|-------|-------|---------|
| SRP19       | 9.39  | -0.34 | 4.1E-01 | DYNC112             | 10.58 | -0.30 | 4.1E-01 |
| COPB2       | 10.41 | -0.34 | 3.7E-01 | TRIM25              | 9.56  | -0.30 | 3.6E-01 |
| DAK         | 9.35  | -0.33 | 4.1E-01 | ABI2                | 9.26  | -0.30 | 4.4E-01 |
| TUBB8       | 10.53 | -0.33 | 3.7E-01 | VWA5A               | 9.02  | -0.30 | 4.8E-01 |
| ARHGAP17    | 9.12  | -0.33 | 4.4E-01 | MPDZ                | 8.17  | -0.30 | 5.1E-01 |
| SNX2        | 10.26 | -0.33 | 3.7E-01 | DRAP1               | 8.95  | -0.30 | 4.8E-01 |
| DPYSL2      | 11.10 | -0.33 | 3.5E-01 | UBE2L6              | 9.16  | -0.30 | 4.8E-01 |
| PIK3C3      | 8.67  | -0.33 | 4.8E-01 | PPP6C               | 9.90  | -0.29 | 4.5E-01 |
| GANAB       | 9.46  | -0.33 | 4.1E-01 | RPE                 | 9.31  | -0.29 | 4.5E-01 |
| ARPC3       | 10.60 | -0.33 | 3.7E-01 | SNX12               | 9.89  | -0.29 | 4.5E-01 |
| EIF6        | 10.03 | -0.33 | 4.1E-01 | CARM1               | 9.54  | -0.29 | 3.7E-01 |
| ACTR2       | 10.59 | -0.33 | 3.7E-01 | CTTN                | 10.18 | -0.29 | 4.1E-01 |
| UBE3A       | 9.75  | -0.33 | 3.3E-01 | PPP3CC              | 8.94  | -0.29 | 4.8E-01 |
| IPO7        | 10.49 | -0.33 | 3.7E-01 | EML1                | 9.67  | -0.29 | 3.7E-01 |
| PDXDC1      | 9.12  | -0.33 | 4.5E-01 | OARD1               | 9.20  | -0.29 | 4.5E-01 |
| RBM8A       | 9.44  | -0.33 | 4.1E-01 | MTHFD1              | 10.64 | -0.29 | 4.0E-01 |
| CCDC22      | 9.27  | -0.33 | 4.1E-01 | PRMT5               | 10.22 | -0.29 | 4.2E-01 |
| NUP155      | 8.78  | -0.33 | 4.8E-01 | CTPS1               | 9.68  | -0.29 | 3.7E-01 |
| ARAF        | 8.31  | -0.33 | 4.8E-01 | TARSL2              | 9.24  | -0.29 | 4.5E-01 |
| DCLK2       | 9.55  | -0.33 | 3.3E-01 | AIP                 | 9.30  | -0.29 | 4.5E-01 |
| UBE2I       | 10.07 | -0.32 | 4.2E-01 | DCTN1;DKFZp686E0752 | 10.71 | -0.29 | 4.0E-01 |
| PDCD6       | 9.99  | -0.32 | 4.2E-01 | COMMD9              | 9.63  | -0.28 | 3.7E-01 |
| SLC27A6     | 10.16 | -0.32 | 4.2E-01 | ABCF2               | 8.97  | -0.28 | 4.9E-01 |
| PDCD6IP     | 10.85 | -0.32 | 3.6E-01 | VBP1                | 10.25 | -0.28 | 4.2E-01 |
| PRKG1       | 9.65  | -0.32 | 3.4E-01 | KIAA1468            | 8.49  | -0.28 | 5.2E-01 |
| LARS        | 10.50 | -0.32 | 3.8E-01 | P4HB                | 11.54 | -0.28 | 4.0E-01 |
| NAA50       | 9.71  | -0.32 | 3.4E-01 | SPAG9               | 9.40  | -0.28 | 4.6E-01 |
| CIAO1       | 9.13  | -0.32 | 4.5E-01 | VPS52               | 9.34  | -0.28 | 4.6E-01 |
| DDX3Y       | 8.47  | -0.32 | 4.9E-01 | DNAJB1              | 9.68  | -0.28 | 3.7E-01 |
| BLVRA       | 10.47 | -0.32 | 3.8E-01 | TRAPPC11            | 8.27  | -0.28 | 5.3E-01 |
| MURC        | 10.18 | -0.32 | 3.8E-01 | H2AFV;H2AFZ         | 9.26  | -0.28 | 4.6E-01 |
| CELF1       | 8.89  | -0.32 | 4.6E-01 | TNNI1               | 10.86 | -0.28 | 4.1E-01 |
| AP3D1       | 9.74  | -0.32 | 3.4E-01 | CAPN2               | 10.43 | -0.28 | 4.3E-01 |
| NPEPL1      | 8.96  | -0.32 | 4.6E-01 | CSRP3               | 11.83 | -0.28 | 4.1E-01 |
| TTC28       | 8.90  | -0.32 | 4.6E-01 | AASDHPPT            | 10.03 | -0.28 | 4.7E-01 |
| ATXN2       | 8.70  | -0.32 | 4.9E-01 | DBN1                | 9.80  | -0.28 | 3.8E-01 |
| EXOC3       | 9.42  | -0.32 | 4.3E-01 | PFN1                | 11.70 | -0.28 | 4.1E-01 |
| EIF2B1      | 9.88  | -0.32 | 4.3E-01 | ECM29;KIAA0368      | 9.98  | -0.28 | 4.7E-01 |
| ESYT1       | 9.80  | -0.32 | 3.5E-01 | SEC23IP             | 9.60  | -0.28 | 3.8E-01 |
| MYL9        | 10.57 | -0.31 | 3.9E-01 | CDC37               | 10.21 | -0.28 | 4.3E-01 |
| LUC7L2      | 8.63  | -0.31 | 4.9E-01 | PABPC1              | 10.66 | -0.28 | 4.1E-01 |
| MVD         | 9.15  | -0.31 | 4.6E-01 | HECTD1              | 9.33  | -0.28 | 4.6E-01 |
| C19orf10    | 10.19 | -0.31 | 3.9E-01 | ADSSL1              | 9.62  | -0.28 | 3.8E-01 |
| ACTC1       | 10.85 | -0.31 | 3.7E-01 | MAP2K2              | 10.27 | -0.28 | 4.3E-01 |
| COPE        | 10.00 | -0.31 | 4.3E-01 | MCMBP               | 8.85  | -0.28 | 5.3E-01 |
| PIK3R4      | 8.58  | -0.31 | 5.0E-01 | C15orf38            | 8.99  | -0.28 | 5.0E-01 |
| NEDD8       | 8.15  | -0.31 | 5.0E-01 | ACPI                | 10.49 | -0.27 | 4.3E-01 |
| TFG         | 10.38 | -0.31 | 3.9E-01 | FKBP1A              | 10.50 | -0.27 | 4.3E-01 |
| AHSA1       | 10.05 | -0.31 | 4.4E-01 | FKBP4               | 10.35 | -0.27 | 4.3E-01 |
| PEX19       | 9.17  | -0.31 | 4.7E-01 | VPS26B              | 9.21  | -0.27 | 4.6E-01 |
| PCLO        | 9.11  | -0.31 | 4.7E-01 | DYNC1L11            | 10.71 | -0.27 | 4.2E-01 |
| USP9X;USP9Y | 10.13 | -0.31 | 4.4E-01 | UBA2                | 9.73  | -0.27 | 3.8E-01 |
| LRRFIP1     | 9.14  | -0.31 | 4.7E-01 | STOM                | 9.65  | -0.27 | 3.8E-01 |
| DDX3X       | 10.07 | -0.31 | 4.4E-01 | ACTN1               | 10.54 | -0.27 | 4.3E-01 |
| HACE1       | 8.45  | -0.31 | 5.0E-01 | PTGES3              | 10.50 | -0.27 | 4.3E-01 |
| C5orf51     | 9.20  | -0.31 | 4.3E-01 | CUL2                | 10.03 | -0.27 | 4.8E-01 |
| C1orf198    | 9.12  | -0.31 | 4.7E-01 | PFDN2               | 10.10 | -0.27 | 4.8E-01 |
| NDRG2       | 10.39 | -0.30 | 4.0E-01 | UBR3                | 9.22  | -0.27 | 4.7E-01 |
| EXOC5       | 9.50  | -0.30 | 4.4E-01 | SARS                | 10.40 | -0.27 | 4.4E-01 |
| UBE2D2      | 10.09 | -0.30 | 4.4E-01 | FEN1                | 9.56  | -0.27 | 3.8E-01 |
| MAPKAP1     | 8.52  | -0.30 | 5.0E-01 | TRAPPC5             | 9.64  | -0.27 | 3.9E-01 |
| ARHGGEF7    | 9.49  | -0.30 | 4.4E-01 | COPZ1               | 10.08 | -0.27 | 4.8E-01 |
| PCNP        | 9.73  | -0.30 | 3.6E-01 | SEPT8               | 10.17 | -0.27 | 4.4E-01 |
| CTSC        | 10.15 | -0.30 | 4.4E-01 | AKAP2               | 10.62 | -0.27 | 4.4E-01 |
| ERC1        | 9.94  | -0.30 | 4.4E-01 | MYO9B               | 9.12  | -0.27 | 5.0E-01 |
| PPM1B       | 9.46  | -0.30 | 4.4E-01 | PITHD1              | 9.56  | -0.27 | 3.9E-01 |
| PPP2R5A     | 9.95  | -0.30 | 4.4E-01 | CNDP2               | 10.63 | -0.27 | 4.4E-01 |
| RAF1        | 9.46  | -0.30 | 4.4E-01 | MAGOHB              | 9.66  | -0.27 | 3.9E-01 |
| PHLDA3      | 8.86  | -0.30 | 4.7E-01 | NARS                | 10.62 | -0.27 | 4.4E-01 |
| PFDN6       | 9.90  | -0.30 | 4.5E-01 | ZC3H15              | 9.09  | -0.27 | 5.1E-01 |
| PALLD       | 10.39 | -0.30 | 4.0E-01 | ANKRD17             | 8.40  | -0.27 | 5.4E-01 |
| UBE2K       | 10.06 | -0.30 | 4.5E-01 | EIF2A               | 9.47  | -0.27 | 4.7E-01 |

|                 |       |       |         |                            |       |       |         |
|-----------------|-------|-------|---------|----------------------------|-------|-------|---------|
| HYPK            | 9.18  | -0.27 | 5.1E-01 | ATXN10                     | 10.02 | -0.23 | 5.3E-01 |
| ACTR3           | 10.80 | -0.26 | 4.3E-01 | HIST1H2AJ;HIST1H2AH;H2AFJ; | 10.66 | -0.23 | 4.7E-01 |
| MAP1S           | 9.67  | -0.26 | 3.9E-01 | HIST2H2AC;HIST1H2AC;HIST3  |       |       |         |
| STAU1           | 9.46  | -0.26 | 4.8E-01 | H2A;HIST2H2AA3;HIST1H2AD;  |       |       |         |
| HMGB1;HMGB1P1   | 11.28 | -0.26 | 4.3E-01 | HIST1H2AG;HIST1H2AB        |       |       |         |
| GLRX2           | 8.86  | -0.26 | 5.4E-01 | EIF2B3                     | 9.06  | -0.23 | 5.4E-01 |
| ANP32A          | 10.96 | -0.26 | 4.3E-01 | GMPS                       | 10.05 | -0.23 | 5.3E-01 |
| SNX9            | 9.59  | -0.26 | 3.9E-01 | SUMO3                      | 10.10 | -0.23 | 5.3E-01 |
| KLC4            | 9.46  | -0.26 | 4.8E-01 | MTR                        | 9.95  | -0.23 | 5.3E-01 |
| ITGA9           | 8.66  | -0.26 | 5.4E-01 | SYNCRIP                    | 10.15 | -0.23 | 5.3E-01 |
| RAB3GAP2        | 9.53  | -0.26 | 3.9E-01 | HIST2H2BE;HIST1H2BB;HI     | 9.37  | -0.23 | 5.1E-01 |
| PROSC           | 10.16 | -0.26 | 4.9E-01 | ST1H2BO;HIST1H2BJ          |       |       |         |
| PSME2           | 10.85 | -0.26 | 4.3E-01 | ILKAP;ILKAP3               | 9.26  | -0.22 | 5.1E-01 |
| RIC8A           | 9.77  | -0.26 | 3.9E-01 | TRIM23                     | 8.87  | -0.22 | 5.5E-01 |
| C11orf68        | 9.17  | -0.26 | 5.1E-01 | PBDC1                      | 9.50  | -0.22 | 5.1E-01 |
| DRG1            | 9.62  | -0.26 | 3.9E-01 | PRKCSH                     | 10.72 | -0.22 | 4.8E-01 |
| NSUN2           | 9.19  | -0.26 | 5.1E-01 | EDF1                       | 9.92  | -0.22 | 5.4E-01 |
| TPM2            | 9.55  | -0.26 | 4.0E-01 | ECE1                       | 9.07  | -0.22 | 5.5E-01 |
| HUWE1           | 10.70 | -0.26 | 4.4E-01 | TCEA1                      | 9.54  | -0.22 | 4.3E-01 |
| TSC1            | 8.50  | -0.26 | 5.5E-01 | COMMD7                     | 9.03  | -0.22 | 5.5E-01 |
| EIF1AY          | 10.25 | -0.26 | 4.5E-01 | A0A0A0MS51                 | 11.85 | -0.22 | 4.8E-01 |
| MSN             | 11.00 | -0.25 | 4.4E-01 | SMYD5                      | 8.97  | -0.22 | 5.5E-01 |
| PAICS           | 10.77 | -0.25 | 4.4E-01 | CKAP5                      | 10.12 | -0.22 | 5.4E-01 |
| RILPL1          | 8.44  | -0.25 | 5.5E-01 | XPO7                       | 10.38 | -0.22 | 4.9E-01 |
| ARHGAP5         | 8.53  | -0.25 | 5.5E-01 | CHMP2A                     | 9.38  | -0.22 | 5.2E-01 |
| CAND2           | 9.97  | -0.25 | 5.0E-01 | PSME4                      | 8.36  | -0.22 | 5.9E-01 |
| PDXP            | 10.16 | -0.25 | 5.0E-01 | PRPSAP2                    | 10.01 | -0.22 | 5.4E-01 |
| BTF3L4          | 9.79  | -0.25 | 4.0E-01 | UBA1                       | 11.16 | -0.22 | 4.9E-01 |
| RAB3GAP1        | 9.36  | -0.25 | 4.9E-01 | ATG4B                      | 8.69  | -0.22 | 5.9E-01 |
| MYOF            | 9.02  | -0.25 | 5.2E-01 | GPRIN3                     | 8.81  | -0.22 | 5.9E-01 |
| PAFAH1B1        | 10.62 | -0.25 | 4.6E-01 | SEC24A                     | 8.67  | -0.22 | 5.9E-01 |
| FAM127A;FAM127C | 9.80  | -0.25 | 4.0E-01 | MAPK3                      | 9.44  | -0.22 | 5.2E-01 |
| KIAA1143        | 8.47  | -0.25 | 5.6E-01 | ATRIP                      | 9.75  | -0.22 | 4.4E-01 |
| ARCN1           | 10.53 | -0.25 | 4.6E-01 | USP24                      | 9.70  | -0.21 | 4.4E-01 |
| RASA1           | 8.70  | -0.25 | 5.6E-01 | WDR77                      | 9.88  | -0.21 | 5.5E-01 |
| MOB2            | 9.32  | -0.25 | 4.9E-01 | PKN2                       | 9.16  | -0.21 | 5.6E-01 |
| NQO2            | 10.05 | -0.25 | 5.1E-01 | SEC24C                     | 9.95  | -0.21 | 5.5E-01 |
| PICALM          | 9.72  | -0.25 | 4.1E-01 | ACTR1B                     | 10.01 | -0.21 | 5.5E-01 |
| TBCC            | 9.07  | -0.24 | 5.3E-01 | RABGAP1                    | 9.60  | -0.21 | 4.4E-01 |
| CHMP5           | 9.60  | -0.24 | 4.1E-01 | SFN                        | 10.93 | -0.21 | 4.9E-01 |
| UBA5            | 9.44  | -0.24 | 4.9E-01 | ATG3                       | 9.42  | -0.21 | 5.3E-01 |
| NCAPG           | 8.02  | -0.24 | 5.6E-01 | HMGB2                      | 10.85 | -0.21 | 4.9E-01 |
| STAT3           | 10.55 | -0.21 | 5.0E-01 | PSME1                      | 11.17 | -0.21 | 4.9E-01 |
| CAPNS1          | 10.71 | -0.24 | 4.5E-01 | BAG5                       | 8.69  | -0.21 | 5.9E-01 |
| CAP2            | 11.13 | -0.24 | 4.5E-01 | CSE1L                      | 10.72 | -0.21 | 4.9E-01 |
| UBL5            | 9.49  | -0.24 | 5.0E-01 | EEA1                       | 10.43 | -0.21 | 5.0E-01 |
| RABGGTB         | 8.82  | -0.24 | 5.6E-01 | VPS4A                      | 10.11 | -0.21 | 5.5E-01 |
| LZTFL1          | 8.98  | -0.24 | 5.3E-01 | GGA2                       | 9.01  | -0.21 | 5.6E-01 |
| TRIO            | 8.29  | -0.24 | 5.6E-01 | RNPEP                      | 10.13 | -0.21 | 5.5E-01 |
| ARPC2           | 10.82 | -0.24 | 4.5E-01 | EIF4E                      | 10.04 | -0.21 | 5.6E-01 |
| TXNDC5          | 10.42 | -0.24 | 4.7E-01 | CAPN1                      | 10.69 | -0.21 | 5.0E-01 |
| RABGGTA         | 9.58  | -0.24 | 4.1E-01 | PTBP1                      | 10.20 | -0.21 | 5.1E-01 |
| MAP4K4          | 9.71  | -0.24 | 4.1E-01 | RHOC                       | 9.86  | -0.21 | 5.6E-01 |
| SEC23A          | 10.53 | -0.24 | 4.7E-01 | GYS1                       | 10.80 | -0.21 | 5.0E-01 |
| PRPSAP1         | 9.18  | -0.24 | 5.3E-01 | PFDN5                      | 10.13 | -0.21 | 5.6E-01 |
| ANKZF1          | 9.25  | -0.24 | 5.0E-01 | C12orf10                   | 9.78  | -0.21 | 4.5E-01 |
| ATP6V1G1        | 9.18  | -0.24 | 5.3E-01 | NISCH                      | 8.66  | -0.21 | 6.0E-01 |
| KIF5B           | 10.84 | -0.24 | 4.6E-01 | RELA                       | 9.75  | -0.21 | 4.5E-01 |
| GSTT1           | 10.23 | -0.24 | 4.7E-01 | SOD1                       | 10.74 | -0.20 | 5.0E-01 |
| DBI             | 10.62 | -0.24 | 4.7E-01 | MIF                        | 11.52 | -0.20 | 5.0E-01 |
| CCDC124         | 9.22  | -0.24 | 5.0E-01 | ANP32B                     | 10.32 | -0.20 | 5.1E-01 |
| HTT             | 9.05  | -0.23 | 5.3E-01 | PCBP1                      | 10.96 | -0.20 | 5.0E-01 |
| TPM1            | 11.44 | -0.23 | 4.6E-01 | MACF1                      | 10.66 | -0.20 | 5.0E-01 |
| PLXNA1          | 8.62  | -0.23 | 5.7E-01 | CROCC                      | 10.37 | -0.20 | 5.1E-01 |
| PXN             | 9.51  | -0.23 | 5.0E-01 | HIST1H2BM;HIST1H2BN;H      | 10.83 | -0.20 | 5.0E-01 |
| ACSL3           | 9.83  | -0.23 | 5.2E-01 | IST1H2BH;HIST2H2BF;HIS     |       |       |         |
| CAD             | 9.85  | -0.23 | 5.2E-01 | T1H2BC;HIST1H2BD;H2BF      |       |       |         |
| UFM1            | 9.60  | -0.23 | 4.2E-01 | S;HIST1H2BK                |       |       |         |
| SLC16A1         | 9.94  | -0.23 | 5.3E-01 | PSMF1                      | 9.24  | -0.20 | 5.4E-01 |
| CARHSP1         | 10.06 | -0.23 | 5.3E-01 | CPT1B                      | 8.70  | -0.20 | 6.0E-01 |
| HSPB7           | 11.32 | -0.23 | 4.7E-01 | HOOK3                      | 8.64  | -0.20 | 6.0E-01 |
| PLIN3           | 10.93 | -0.23 | 4.7E-01 | CAND1                      | 11.04 | -0.20 | 5.1E-01 |

|               |       |       |         |               |       |       |         |
|---------------|-------|-------|---------|---------------|-------|-------|---------|
| NXN           | 9.79  | -0.20 | 4.5E-01 | HMBS          | 8.84  | -0.17 | 6.4E-01 |
| NAP1L1        | 10.42 | -0.20 | 5.1E-01 | VASP          | 9.78  | -0.17 | 4.9E-01 |
| EXOC8         | 9.48  | -0.20 | 5.4E-01 | AP1M1         | 9.63  | -0.17 | 4.9E-01 |
| COPS7B        | 9.74  | -0.20 | 4.5E-01 | MAPKAPK2      | 9.36  | -0.16 | 5.8E-01 |
| SUMO1         | 9.00  | -0.20 | 5.7E-01 | EIF4E2        | 9.29  | -0.16 | 5.8E-01 |
| MTMR6         | 8.78  | -0.20 | 6.1E-01 | LAGE3         | 8.91  | -0.16 | 6.1E-01 |
| CCT3          | 11.32 | -0.20 | 5.1E-01 | PRPS1         | 10.47 | -0.16 | 5.6E-01 |
| GMDS          | 8.54  | -0.20 | 6.1E-01 | STRAP         | 10.45 | -0.16 | 5.6E-01 |
| GUSB          | 8.96  | -0.20 | 5.7E-01 | NRBP2         | 8.92  | -0.16 | 6.1E-01 |
| UBE2D1;UBE2D4 | 9.34  | -0.20 | 5.4E-01 | PDAP1         | 9.61  | -0.16 | 4.9E-01 |
| LSM12         | 9.26  | -0.20 | 5.4E-01 | HMGCS1        | 9.72  | -0.16 | 4.9E-01 |
| RAD23B        | 10.51 | -0.20 | 5.2E-01 | MAT2A         | 10.27 | -0.16 | 5.6E-01 |
| SMAD4         | 8.77  | -0.19 | 6.1E-01 | EIF2S2        | 9.93  | -0.16 | 6.1E-01 |
| EML2          | 10.01 | -0.19 | 5.7E-01 | SERPINB1      | 9.74  | -0.16 | 4.9E-01 |
| DPYSL3        | 11.70 | -0.19 | 5.2E-01 | TBCA          | 10.57 | -0.16 | 5.6E-01 |
| ADPRHL2       | 9.94  | -0.19 | 5.7E-01 | ENY2          | 8.87  | -0.16 | 6.1E-01 |
| EEF1D         | 9.63  | -0.19 | 4.6E-01 | RBPMS         | 10.09 | -0.16 | 6.2E-01 |
| RAPGEF2       | 9.01  | -0.19 | 5.8E-01 | KPNB1         | 11.02 | -0.16 | 5.6E-01 |
| PHKA2         | 9.35  | -0.19 | 5.5E-01 | SEPHS1        | 9.43  | -0.16 | 5.8E-01 |
| KPNA1         | 9.74  | -0.19 | 4.6E-01 | DCAF8         | 9.09  | -0.16 | 6.1E-01 |
| FAM114A2      | 9.52  | -0.19 | 4.6E-01 | AHCY          | 11.27 | -0.16 | 5.6E-01 |
| IGF2BP3       | 10.15 | -0.19 | 5.8E-01 | STRIP2;FAM40B | 9.45  | -0.16 | 5.8E-01 |
| ZC2HC1A       | 9.48  | -0.19 | 5.5E-01 | LAMP1         | 10.22 | -0.16 | 5.7E-01 |
| TSTA3         | 9.94  | -0.19 | 5.8E-01 | UGGT1         | 10.57 | -0.16 | 5.7E-01 |
| TPD52L2       | 10.06 | -0.19 | 5.8E-01 | PDE12         | 8.83  | -0.16 | 6.5E-01 |
| SRI           | 10.32 | -0.19 | 5.3E-01 | NAPRT1        | 9.58  | -0.16 | 5.0E-01 |
| APPL1         | 9.66  | -0.19 | 4.7E-01 | HEBP1         | 9.84  | -0.16 | 6.2E-01 |
| GTPBP1        | 9.64  | -0.19 | 4.7E-01 | MAP7D1        | 9.15  | -0.16 | 6.1E-01 |
| DCTN5         | 9.53  | -0.19 | 4.7E-01 | UFC1          | 9.67  | -0.16 | 5.0E-01 |
| OPTN          | 9.51  | -0.19 | 5.5E-01 | H6PD          | 9.51  | -0.15 | 5.9E-01 |
| TUBB3         | 9.87  | -0.19 | 5.9E-01 | YTHDF2        | 9.22  | -0.15 | 5.9E-01 |
| C11orf73      | 9.54  | -0.18 | 4.7E-01 | NUDCD3        | 9.14  | -0.15 | 6.2E-01 |
| TCP1          | 11.22 | -0.18 | 5.3E-01 | MCTS1         | 9.90  | -0.15 | 6.3E-01 |
| SYNJ1         | 9.79  | -0.18 | 4.7E-01 | SGTA          | 10.27 | -0.15 | 5.8E-01 |
| PYCR2         | 8.92  | -0.18 | 5.9E-01 | COL4A3BP      | 8.72  | -0.15 | 6.6E-01 |
| TALDO1        | 10.94 | -0.18 | 5.3E-01 | MAT2B         | 9.99  | -0.15 | 6.3E-01 |
| IGBP1         | 8.80  | -0.18 | 6.2E-01 | EIF4H         | 10.37 | -0.15 | 5.8E-01 |
| DDX19A        | 9.99  | -0.18 | 5.9E-01 | MSRB3         | 9.58  | -0.15 | 5.0E-01 |
| ABCF1         | 9.91  | -0.18 | 5.9E-01 | EEF1D         | 11.05 | -0.15 | 5.8E-01 |
| LRRC47        | 10.64 | -0.18 | 5.3E-01 | RHEB          | 9.78  | -0.15 | 5.0E-01 |
| MESDC2        | 10.00 | -0.18 | 5.9E-01 | ACTA2;ACTG2   | 12.48 | -0.15 | 5.8E-01 |
| EXOC2         | 9.63  | -0.18 | 4.7E-01 | SDC2          | 8.19  | -0.15 | 6.6E-01 |
| ATG7          | 8.63  | -0.18 | 6.3E-01 | CCT7          | 11.18 | -0.15 | 5.8E-01 |
| TCEB2         | 10.78 | -0.18 | 5.4E-01 | QRICH1        | 8.54  | -0.15 | 6.6E-01 |
| WDR44         | 9.00  | -0.18 | 5.9E-01 | VCP           | 11.53 | -0.15 | 5.8E-01 |
| PAFAH1B3      | 10.45 | -0.18 | 5.4E-01 | GAPDH         | 12.70 | -0.15 | 5.8E-01 |
| CCT5          | 11.24 | -0.18 | 5.4E-01 | TBC1D13       | 9.03  | -0.15 | 6.2E-01 |
| UBAP2L        | 9.74  | -0.18 | 4.8E-01 | ANP32E        | 10.09 | -0.15 | 6.4E-01 |
| MYO18B        | 9.78  | -0.18 | 4.8E-01 | PPIB          | 11.17 | -0.15 | 5.8E-01 |
| MTHFS         | 8.89  | -0.18 | 5.9E-01 | OPLAH         | 10.08 | -0.15 | 6.4E-01 |
| CCT2          | 11.43 | -0.18 | 5.4E-01 | HSP90B1       | 11.83 | -0.15 | 5.8E-01 |
| FAM177A1      | 8.32  | -0.17 | 6.3E-01 | TUBAL3        | 9.87  | -0.15 | 6.4E-01 |
| DUSP3         | 10.52 | -0.17 | 5.5E-01 | WASF3         | 8.35  | -0.14 | 6.6E-01 |
| EXOC1         | 9.14  | -0.17 | 6.0E-01 | GSN           | 10.43 | -0.14 | 5.9E-01 |
| PFDN4         | 9.68  | -0.17 | 4.8E-01 | XPO1          | 10.73 | -0.14 | 5.9E-01 |
| EIF4G2        | 10.02 | -0.17 | 6.0E-01 | LAMA5         | 9.37  | -0.14 | 6.0E-01 |
| MLIP          | 10.31 | -0.17 | 5.5E-01 | CTPS2         | 10.04 | -0.14 | 6.4E-01 |
| APIP          | 9.27  | -0.17 | 5.7E-01 | UBQLN2        | 10.16 | -0.14 | 6.4E-01 |
| PATL1         | 8.36  | -0.17 | 6.3E-01 | ITPA          | 9.14  | -0.14 | 6.3E-01 |
| ANXA11        | 10.70 | -0.17 | 5.5E-01 | ADK           | 9.61  | -0.14 | 5.1E-01 |
| VTA1          | 10.07 | -0.17 | 6.0E-01 | EIF2B2        | 9.61  | -0.14 | 5.1E-01 |
| ACAT2         | 10.37 | -0.17 | 5.5E-01 | TROVE2        | 10.63 | -0.14 | 5.9E-01 |
| UBE2M         | 10.17 | -0.17 | 5.5E-01 | ADSL          | 10.25 | -0.14 | 5.9E-01 |
| RNF31         | 8.75  | -0.17 | 6.4E-01 | TBCE          | 9.51  | -0.14 | 6.0E-01 |
| ARHGEF12      | 8.51  | -0.17 | 6.4E-01 | YWHAE         | 12.05 | -0.14 | 5.9E-01 |
| AP3S1         | 9.05  | -0.17 | 6.0E-01 | AGL           | 11.29 | -0.14 | 5.9E-01 |
| FAM96B        | 9.62  | -0.17 | 4.8E-01 | CLUH          | 9.41  | -0.14 | 6.0E-01 |
| DBNL          | 10.24 | -0.17 | 5.6E-01 | HSPA8         | 11.92 | -0.14 | 5.9E-01 |
| ALDOA         | 12.38 | -0.17 | 5.5E-01 | TNNT2;HNTN1   | 10.84 | -0.14 | 6.0E-01 |
| NUDCD2        | 9.73  | -0.17 | 4.9E-01 | CAMK2D        | 11.10 | -0.14 | 6.0E-01 |
| DOCK7         | 9.42  | -0.17 | 5.7E-01 | APOL2         | 9.56  | -0.14 | 5.2E-01 |
| EPRS          | 10.74 | -0.17 | 5.5E-01 | NUP93         | 9.40  | -0.14 | 6.1E-01 |

|          |       |       |         |             |       |       |         |
|----------|-------|-------|---------|-------------|-------|-------|---------|
| CRKL     | 9.87  | -0.14 | 6.5E-01 | TATDN1      | 9.45  | -0.11 | 6.4E-01 |
| PSMB8    | 9.54  | -0.14 | 5.2E-01 | PDCD5       | 10.22 | -0.11 | 6.4E-01 |
| TNPO3    | 9.06  | -0.14 | 6.4E-01 | PPP4C       | 9.38  | -0.11 | 6.4E-01 |
| ARHGEF11 | 7.86  | -0.14 | 6.7E-01 | VPS53       | 8.87  | -0.11 | 6.7E-01 |
| PGRMC2   | 10.31 | -0.14 | 6.0E-01 | RBBP9       | 9.53  | -0.10 | 5.5E-01 |
| PPP1CA   | 9.71  | -0.14 | 5.2E-01 | CCNY        | 8.67  | -0.10 | 7.1E-01 |
| PPF1A1   | 8.32  | -0.13 | 6.8E-01 | CDC42       | 10.43 | -0.10 | 6.4E-01 |
| FTO      | 8.96  | -0.13 | 6.4E-01 | CLEC16A     | 9.69  | -0.10 | 5.5E-01 |
| PPP1R7   | 9.93  | -0.13 | 6.5E-01 | PGAM1       | 11.89 | -0.10 | 6.4E-01 |
| PGM1     | 11.38 | -0.13 | 6.0E-01 | BAX         | 9.96  | -0.10 | 6.9E-01 |
| CHP1     | 9.74  | -0.13 | 5.2E-01 | RRAGA;RRAGB | 9.46  | -0.10 | 6.5E-01 |
| CRADD    | 9.07  | -0.13 | 6.4E-01 | STRN        | 9.99  | -0.10 | 7.0E-01 |
| TUBB6    | 11.16 | -0.13 | 6.0E-01 | PLAA        | 9.68  | -0.10 | 5.6E-01 |
| FHOD3    | 8.83  | -0.13 | 6.8E-01 | PIP4K2C     | 8.96  | -0.10 | 6.7E-01 |
| DNPH1    | 9.96  | -0.13 | 6.6E-01 | YWHAZ       | 11.83 | -0.10 | 6.5E-01 |
| MAPRE1   | 10.79 | -0.13 | 6.1E-01 | OLA1        | 10.48 | -0.10 | 6.5E-01 |
| CCT4     | 11.39 | -0.13 | 6.1E-01 | LYPLA1      | 10.28 | -0.10 | 6.5E-01 |
| DCTN3    | 10.20 | -0.13 | 6.1E-01 | KLC1        | 10.20 | -0.10 | 6.5E-01 |
| FN3K     | 9.67  | -0.13 | 5.3E-01 | TCEB1       | 10.53 | -0.10 | 6.5E-01 |
| UBE2R2   | 8.53  | -0.13 | 6.8E-01 | PDCL3       | 9.16  | -0.10 | 6.7E-01 |
| GMPPA    | 9.67  | -0.13 | 5.3E-01 | USP11       | 8.64  | -0.10 | 7.1E-01 |
| GMFB     | 9.72  | -0.13 | 5.3E-01 | MYLK        | 9.80  | -0.10 | 5.6E-01 |
| CCT8     | 11.47 | -0.13 | 6.1E-01 | NAGK        | 10.29 | -0.10 | 6.5E-01 |
| DUSP27   | 9.44  | -0.13 | 6.2E-01 | RNH1        | 11.00 | -0.10 | 6.5E-01 |
| DYNC2H1  | 8.56  | -0.13 | 6.8E-01 | DENR        | 9.81  | -0.10 | 5.6E-01 |
| DFFA     | 9.24  | -0.13 | 6.2E-01 | ASAP1       | 8.89  | -0.10 | 6.8E-01 |
| EIF4G3   | 8.39  | -0.13 | 6.8E-01 | EZR         | 11.74 | -0.10 | 6.5E-01 |
| QKI      | 10.05 | -0.13 | 6.6E-01 | CAPZA2      | 10.73 | -0.10 | 6.6E-01 |
| UBE3C    | 9.60  | -0.13 | 5.3E-01 | IGF2BP2     | 10.19 | -0.10 | 6.5E-01 |
| MAPRE3   | 9.68  | -0.13 | 5.3E-01 | RAD23A      | 9.72  | -0.10 | 5.6E-01 |
| ECHDC1   | 8.74  | -0.13 | 6.9E-01 | GANAB       | 11.13 | -0.09 | 6.6E-01 |
| VPS51    | 8.94  | -0.13 | 6.5E-01 | NHLRC2      | 10.18 | -0.09 | 6.6E-01 |
| IGF2R    | 9.81  | -0.12 | 5.3E-01 | IGF2BP1     | 10.66 | -0.09 | 6.6E-01 |
| PCNA     | 10.12 | -0.12 | 6.7E-01 | CD81        | 9.98  | -0.09 | 7.1E-01 |
| EMILIN1  | 9.93  | -0.12 | 6.7E-01 | EDC4        | 9.89  | -0.09 | 7.1E-01 |
| RPL38    | 10.25 | -0.12 | 6.2E-01 | RAC1        | 10.52 | -0.09 | 6.6E-01 |
| ZZEF1    | 10.02 | -0.12 | 6.7E-01 | AP4S1       | 8.99  | -0.09 | 6.8E-01 |
| SHROOM3  | 10.02 | -0.12 | 6.7E-01 | EIF5        | 10.02 | -0.09 | 7.1E-01 |
| ADAL     | 8.56  | -0.12 | 6.9E-01 | EXOSC6      | 8.47  | -0.09 | 7.2E-01 |
| AP4E1    | 9.34  | -0.12 | 6.2E-01 | HEATR3      | 8.21  | -0.09 | 7.2E-01 |
| FAM211A  | 9.05  | -0.12 | 6.5E-01 | DRG2        | 9.47  | -0.09 | 6.6E-01 |
| RAB5C    | 9.74  | -0.12 | 5.4E-01 | PTP4A2      | 9.09  | -0.09 | 6.9E-01 |
| DIS3     | 8.88  | -0.12 | 6.5E-01 | ARF6        | 9.78  | -0.09 | 5.7E-01 |
| CUL3     | 9.96  | -0.12 | 6.7E-01 | FILIP1      | 9.85  | -0.09 | 7.2E-01 |
| NTMT1    | 9.13  | -0.12 | 6.5E-01 | SMS         | 10.61 | -0.09 | 6.6E-01 |
| APIS2    | 9.18  | -0.12 | 6.5E-01 | EIF3A       | 10.63 | -0.09 | 6.6E-01 |
| VAC14    | 9.81  | -0.12 | 5.4E-01 | CAB39       | 10.12 | -0.09 | 7.2E-01 |
| VPS8     | 7.98  | -0.12 | 6.9E-01 | PPM1A       | 9.47  | -0.09 | 6.6E-01 |
| DVL2     | 8.68  | -0.12 | 6.9E-01 | YARS        | 10.66 | -0.09 | 6.7E-01 |
| WIBG     | 8.54  | -0.12 | 6.9E-01 | TSN         | 10.53 | -0.09 | 6.7E-01 |
| APEH     | 10.56 | -0.12 | 6.2E-01 | C11orf54    | 10.01 | -0.09 | 7.2E-01 |
| FN1      | 9.75  | -0.12 | 5.4E-01 | FRYL        | 9.44  | -0.09 | 6.7E-01 |
| TXNRD1   | 9.93  | -0.12 | 6.8E-01 | LZIC        | 9.88  | -0.08 | 7.2E-01 |
| ALCAM    | 9.42  | -0.12 | 6.3E-01 | NPLOC4      | 10.00 | -0.08 | 7.2E-01 |
| G3BP1    | 9.62  | -0.11 | 5.4E-01 | BTF3        | 10.05 | -0.08 | 7.2E-01 |
| AGFG1    | 8.98  | -0.11 | 6.6E-01 | LRBA        | 9.41  | -0.08 | 6.7E-01 |
| YWHAB    | 11.00 | -0.11 | 6.3E-01 | SCRN3       | 8.68  | -0.08 | 7.3E-01 |
| PPP2R4   | 10.15 | -0.11 | 6.8E-01 | PIN1        | 9.99  | -0.08 | 7.3E-01 |
| PPP2R5D  | 9.85  | -0.11 | 6.8E-01 | FRY         | 9.47  | -0.08 | 6.7E-01 |
| SCRN1    | 10.48 | -0.11 | 6.3E-01 | CAPZB       | 10.84 | -0.08 | 6.8E-01 |
| KPNA6    | 9.04  | -0.11 | 6.6E-01 | SEC16A      | 9.06  | -0.08 | 7.0E-01 |
| HSPA4    | 10.98 | -0.11 | 6.3E-01 | PRUNE       | 9.90  | -0.08 | 7.3E-01 |
| STAT6    | 8.95  | -0.11 | 6.6E-01 | C16orf62    | 8.89  | -0.08 | 7.0E-01 |
| C4orf27  | 8.95  | -0.11 | 6.6E-01 | PDLIM4      | 9.25  | -0.08 | 6.7E-01 |
| EIF2AK2  | 9.38  | -0.11 | 6.4E-01 | PCYT2       | 9.27  | -0.08 | 6.8E-01 |
| POLR2B   | 9.49  | -0.11 | 6.4E-01 | IMPDH2      | 10.58 | -0.08 | 6.8E-01 |
| CRYZL1   | 8.81  | -0.11 | 7.0E-01 | TBC1D9B     | 9.26  | -0.08 | 6.8E-01 |
| MTHFD1L  | 9.89  | -0.11 | 6.9E-01 | DCUN1D1     | 9.92  | -0.08 | 7.4E-01 |
| GPX4     | 10.02 | -0.11 | 6.9E-01 | WDR61       | 9.76  | -0.07 | 5.9E-01 |
| BABAM1   | 9.39  | -0.11 | 6.4E-01 | ABCE1       | 9.89  | -0.07 | 7.4E-01 |
| COL4A1   | 8.96  | -0.11 | 6.6E-01 | UFD1L       | 10.14 | -0.07 | 7.4E-01 |
| DNAJC10  | 9.25  | -0.11 | 6.4E-01 | FAM49B      | 10.38 | -0.07 | 6.9E-01 |

|                 |       |       |         |                    |       |       |         |
|-----------------|-------|-------|---------|--------------------|-------|-------|---------|
| PGLS            | 10.47 | -0.07 | 6.9E-01 | ARF5               | 9.83  | -0.04 | 7.9E-01 |
| DDT;DDTL        | 10.83 | -0.07 | 6.9E-01 | YY1;YY2            | 8.76  | -0.04 | 7.8E-01 |
| CSPG4           | 9.37  | -0.07 | 6.8E-01 | DCAF6              | 8.30  | -0.04 | 7.8E-01 |
| LDHB            | 12.19 | -0.07 | 7.0E-01 | NUDT4              | 9.83  | -0.04 | 7.9E-01 |
| RPL23           | 10.57 | -0.07 | 6.9E-01 | FAM175B            | 9.42  | -0.04 | 7.2E-01 |
| ARFGAP3         | 9.03  | -0.07 | 7.1E-01 | DDB1               | 10.72 | -0.04 | 7.5E-01 |
| BANF1           | 9.82  | -0.07 | 7.4E-01 | CHMP3              | 8.74  | -0.04 | 7.9E-01 |
| EIF2B4          | 9.40  | -0.07 | 6.9E-01 | AHCYL1;AHCYL2      | 9.82  | -0.04 | 7.9E-01 |
| UBE2V1;TMEM189  | 10.62 | -0.07 | 6.9E-01 | NUBP2              | 10.01 | -0.04 | 7.9E-01 |
| UBR1            | 8.91  | -0.07 | 7.1E-01 | IAH1               | 9.76  | -0.04 | 6.3E-01 |
| CCT6A           | 11.23 | -0.07 | 7.0E-01 | SIL1               | 8.89  | -0.03 | 7.5E-01 |
| NSDHL           | 10.22 | -0.07 | 6.9E-01 | ACYP1              | 10.12 | -0.03 | 7.9E-01 |
| CAPZA1          | 10.33 | -0.07 | 6.9E-01 | SETD3              | 9.21  | -0.03 | 7.3E-01 |
| OAT             | 9.13  | -0.07 | 7.1E-01 | DNPEP              | 10.38 | -0.03 | 7.4E-01 |
| HSPB1           | 12.37 | -0.07 | 7.0E-01 | GNPDA2             | 9.85  | -0.03 | 8.0E-01 |
| GRIPAP1         | 8.84  | -0.07 | 7.5E-01 | RPS27              | 10.26 | -0.03 | 7.4E-01 |
| IPO5            | 10.67 | -0.07 | 7.0E-01 | BAG6               | 9.77  | -0.03 | 6.4E-01 |
| HECTD4          | 9.32  | -0.06 | 6.9E-01 | SERPINB6           | 10.64 | -0.03 | 7.6E-01 |
| BLVRB           | 10.71 | -0.06 | 7.1E-01 | PARK7              | 11.33 | -0.03 | 7.6E-01 |
| LPP             | 10.36 | -0.06 | 7.0E-01 | CPNE1              | 10.44 | -0.03 | 7.4E-01 |
| AS3MT           | 9.03  | -0.06 | 7.1E-01 | VPS36              | 9.59  | -0.03 | 6.4E-01 |
| UBXN1           | 9.77  | -0.06 | 6.0E-01 | RABL6              | 9.12  | -0.03 | 7.5E-01 |
| MSH6            | 9.71  | -0.06 | 6.0E-01 | XPNPEP3            | 9.23  | -0.03 | 7.3E-01 |
| TIPRL           | 10.17 | -0.06 | 7.0E-01 | EIF2S1             | 10.47 | -0.03 | 7.4E-01 |
| RGL2            | 8.77  | -0.06 | 7.6E-01 | EIF3B              | 10.26 | -0.03 | 7.4E-01 |
| S100A16         | 9.18  | -0.06 | 7.2E-01 | INPL1              | 9.51  | -0.03 | 7.3E-01 |
| DCPS            | 9.83  | -0.06 | 7.6E-01 | PCBD1              | 10.33 | -0.03 | 7.5E-01 |
| RPS27L          | 9.64  | -0.06 | 6.1E-01 | RPS11              | 10.81 | -0.03 | 7.6E-01 |
| LLGL1           | 9.44  | -0.06 | 7.0E-01 | TSNAX;DISC1        | 9.83  | -0.03 | 8.0E-01 |
| RPS7            | 10.79 | -0.06 | 7.1E-01 | STK38L             | 9.35  | -0.03 | 7.3E-01 |
| TRAFD1          | 8.72  | -0.06 | 7.6E-01 | VPS33A             | 8.97  | -0.03 | 7.6E-01 |
| SYNPO2L         | 9.31  | -0.06 | 7.0E-01 | TTC1               | 9.22  | -0.03 | 7.4E-01 |
| BLMH            | 10.34 | -0.06 | 7.1E-01 | TRAPPC4            | 9.30  | -0.03 | 7.4E-01 |
| PKM             | 12.48 | -0.06 | 7.2E-01 | MAP2K4             | 9.61  | -0.02 | 6.5E-01 |
| DNAJC13         | 9.57  | -0.06 | 6.1E-01 | BAG3               | 10.32 | -0.02 | 7.5E-01 |
| PEPD            | 9.97  | -0.06 | 7.6E-01 | DCAF7              | 9.49  | -0.02 | 7.4E-01 |
| PPIA            | 11.75 | -0.06 | 7.2E-01 | VPS41              | 8.76  | -0.02 | 8.0E-01 |
| CLTC            | 11.46 | -0.06 | 7.2E-01 | MAPK1              | 10.44 | -0.02 | 7.6E-01 |
| NAA20           | 8.87  | -0.05 | 7.2E-01 | PYGB               | 11.94 | -0.02 | 7.7E-01 |
| UPF1            | 9.94  | -0.05 | 7.6E-01 | ARMCX3             | 8.85  | -0.02 | 8.0E-01 |
| NUCB1           | 9.86  | -0.05 | 7.6E-01 | GCA                | 9.45  | -0.02 | 7.4E-01 |
| NEK9            | 9.80  | -0.05 | 6.1E-01 | EEF1G              | 11.33 | -0.02 | 7.8E-01 |
| METTL14         | 8.41  | -0.05 | 7.7E-01 | RQCD1              | 9.27  | -0.02 | 7.4E-01 |
| SUGT1           | 10.09 | -0.05 | 7.7E-01 | MTAP               | 10.16 | -0.02 | 8.2E-01 |
| LANCL1          | 10.41 | -0.05 | 7.1E-01 | SCYL2              | 9.44  | -0.02 | 7.5E-01 |
| SLC12A2         | 8.22  | -0.05 | 7.7E-01 | SLC12A7            | 9.52  | -0.02 | 7.5E-01 |
| SMYD1           | 10.81 | -0.05 | 7.2E-01 | YBX3               | 9.65  | -0.02 | 6.6E-01 |
| CKMT2           | 11.25 | -0.05 | 7.3E-01 | ENOPH1             | 9.78  | -0.02 | 6.6E-01 |
| PPIH            | 9.47  | -0.05 | 7.1E-01 | NSFL1C             | 10.42 | -0.02 | 7.6E-01 |
| RBM3            | 9.27  | -0.05 | 7.1E-01 | GLTP               | 9.01  | -0.02 | 7.7E-01 |
| SSB             | 10.82 | -0.05 | 7.3E-01 | USP5               | 10.61 | -0.01 | 7.7E-01 |
| CUL4B           | 8.68  | -0.05 | 7.7E-01 | CSTB               | 10.71 | -0.01 | 7.8E-01 |
| EIF3C;EIF3CL    | 10.22 | -0.05 | 7.2E-01 | CCS                | 9.68  | -0.01 | 6.6E-01 |
| LSM1            | 9.54  | -0.05 | 6.2E-01 | UBE2N;UBE2NL       | 10.88 | -0.01 | 7.9E-01 |
| PPP6R2          | 9.08  | -0.05 | 7.3E-01 | ATG5               | 8.76  | -0.01 | 8.1E-01 |
| SEN8            | 9.00  | -0.05 | 7.3E-01 | RPS10              | 10.04 | -0.01 | 8.2E-01 |
| FKBP9           | 9.90  | -0.05 | 7.8E-01 | PTPLAD1            | 8.56  | -0.01 | 8.1E-01 |
| PFDN1           | 10.26 | -0.04 | 7.2E-01 | USO1               | 10.60 | -0.01 | 7.7E-01 |
| RARS            | 10.77 | -0.04 | 7.4E-01 | PAIP1              | 9.91  | -0.01 | 8.3E-01 |
| SUMO2;SUMO4     | 9.82  | -0.04 | 7.8E-01 | DCTN2              | 10.56 | -0.01 | 7.7E-01 |
| EIF2S3;EIF2S3L  | 10.40 | -0.04 | 7.2E-01 | TTLL12             | 9.61  | -0.01 | 6.6E-01 |
| GALNS           | 9.13  | -0.04 | 7.4E-01 | TXNL1              | 10.24 | -0.01 | 7.7E-01 |
| NAPG            | 9.47  | -0.04 | 7.2E-01 | ST13;ST13P5;ST13P4 | 10.79 | -0.01 | 7.9E-01 |
| EVL             | 8.99  | -0.04 | 7.4E-01 | C15orf52           | 9.37  | -0.01 | 7.6E-01 |
| PAK4            | 8.62  | -0.04 | 7.8E-01 | RALGAPA1           | 10.41 | -0.01 | 7.8E-01 |
| GRHPR           | 10.95 | -0.04 | 7.4E-01 | DPYSL4             | 10.04 | -0.01 | 8.3E-01 |
| DYNLRB1;DYNLRB2 | 10.35 | -0.04 | 7.3E-01 | ANXA6              | 9.33  | -0.01 | 7.6E-01 |
| EPN1            | 8.91  | -0.04 | 7.4E-01 | DLG3               | 8.81  | -0.01 | 8.2E-01 |
| SNF8            | 9.41  | -0.04 | 7.2E-01 | SPG20              | 8.78  | -0.01 | 8.2E-01 |
| EHD1            | 10.96 | -0.04 | 7.4E-01 | ACTR1A             | 10.82 | -0.01 | 7.9E-01 |
| FAF1            | 9.14  | -0.04 | 7.4E-01 | UBE4B              | 9.25  | -0.01 | 7.6E-01 |
| LACTB           | 8.70  | -0.04 | 7.8E-01 | MOCS2              | 9.10  | -0.01 | 7.8E-01 |



|                  |       |       |         |        |       |      |         |
|------------------|-------|-------|---------|--------|-------|------|---------|
| PRKAR1A          | 10.63 | -0.01 | 7.9E-01 | TPMT   | 8.69  | 0.00 | 8.2E-01 |
| PHKB             | 9.69  | -0.01 | 6.7E-01 | PPP5C  | 10.37 | 0.00 | 7.9E-01 |
| SH3GLB2          | 9.82  | -0.01 | 8.3E-01 | CSDE1  | 10.01 | 0.00 | 8.4E-01 |
| UBA3             | 10.28 | 0.00  | 7.8E-01 | HEXB   | 10.09 | 0.00 | 8.4E-01 |
| PITPNB           | 9.89  | 0.00  | 8.4E-01 | DARS   | 10.78 | 0.00 | 8.1E-01 |
| PA2G4            | 10.86 | 0.00  | 8.0E-01 | MYH7B  | 10.17 | 0.00 | 7.9E-01 |
| NEDD8-MDP1;NEDD8 | 10.19 | 0.00  | 7.8E-01 | NCALD  | 8.96  | 0.00 | 7.9E-01 |
| FAM120A          | 9.54  | 0.00  | 6.7E-01 | EEF1B2 | 10.81 | 0.00 | 8.1E-01 |
| VPS18            | 8.92  | 0.00  | 7.8E-01 | ACOX1  | 9.23  | 0.00 | 7.7E-01 |
| ATP6V1C1         | 9.39  | 0.00  | 7.6E-01 | DIS3L2 | 8.67  | 0.00 | 8.3E-01 |
| MRII             | 9.41  | 0.00  | 7.6E-01 | PSMD10 | 9.84  | 0.00 | 8.5E-01 |

**(B)** 2,126 proteins with log2 fold > 0, of which 94 were significantly higher expressed in iPSC-aCMs.

| Gene name                | log10 intensity | log2 (aCMs/vCMs) | Significance B | Gene names  | log10 intensity | log2 (aCMs/vCMs) | Significance B |
|--------------------------|-----------------|------------------|----------------|-------------|-----------------|------------------|----------------|
| PADI2                    | 10.27           | 4.82             | <b>7.2E-09</b> | SDHD        | 9.70            | 2.04             | 7.3E-02        |
| MYH4                     | 10.57           | 4.81             | <b>8.0E-09</b> | MRPS30      | 9.02            | 2.04             | <b>2.5E-02</b> |
| SMARCA4                  | 9.61            | 4.31             | <b>4.7E-05</b> | MT-ATP8     | 10.23           | 2.03             | <b>2.0E-02</b> |
| GNAO1                    | 9.97            | 4.02             | <b>2.7E-05</b> | SMIM8       | 8.42            | 1.99             | <b>2.1E-02</b> |
| NR2F2;NR2F1              | 9.05            | 3.84             | <b>1.0E-05</b> | ATP5C1      | 11.23           | 1.98             | <b>2.2E-02</b> |
| MYH6                     | 12.11           | 3.82             | <b>4.7E-06</b> | PDGFRB      | 10.60           | 1.97             | <b>2.4E-02</b> |
| NPPA                     | 9.31            | 3.78             | <b>1.4E-04</b> | TMEM256     | 9.32            | 1.96             | 6.0E-02        |
| METTL7B                  | 9.44            | 3.74             | <b>1.6E-04</b> | LYRM5       | 8.79            | 1.96             | <b>2.3E-02</b> |
| MGARP                    | 9.57            | 3.67             | <b>6.1E-04</b> | SDHC        | 9.68            | 1.96             | 8.7E-02        |
| DES                      | 11.05           | 3.66             | <b>1.2E-05</b> | BASP1       | 9.34            | 1.94             | 6.2E-02        |
| VSNL1                    | 9.89            | 3.58             | <b>2.0E-04</b> | ATP5F1      | 11.24           | 1.93             | <b>2.5E-02</b> |
| CASQ2                    | 9.87            | 3.21             | <b>9.0E-04</b> | ATP5O       | 11.41           | 1.93             | <b>2.5E-02</b> |
| ADCY5                    | 9.82            | 3.19             | <b>9.7E-04</b> | TIMM10B     | 8.49            | 1.92             | <b>2.6E-02</b> |
| MYL7                     | 11.54           | 3.16             | <b>1.7E-04</b> | TMEM70      | 9.36            | 1.92             | 6.6E-02        |
| ATPIB2                   | 8.72            | 3.13             | <b>1.8E-04</b> | AIG1        | 8.60            | 1.91             | <b>2.7E-02</b> |
| COX7A1                   | 9.44            | 3.03             | <b>2.5E-03</b> | MT-ATP6     | 10.28           | 1.91             | <b>2.9E-02</b> |
| SOD3                     | 9.42            | 2.96             | <b>3.2E-03</b> | CES2        | 9.25            | 1.91             | 6.8E-02        |
| NME4                     | 9.63            | 2.81             | <b>1.0E-02</b> | ATP5H       | 11.04           | 1.90             | <b>2.8E-02</b> |
| ATP2A2                   | 11.88           | 2.78             | <b>1.0E-03</b> | ATP5D       | 10.68           | 1.89             | <b>2.8E-02</b> |
| CRYM                     | 9.45            | 2.72             | <b>7.3E-03</b> | ATP5J2      | 10.63           | 1.89             | <b>3.1E-02</b> |
| MYOM2                    | 8.73            | 2.67             | <b>1.5E-03</b> | PDHB        | 11.15           | 1.89             | <b>2.9E-02</b> |
| MYH11                    | 9.07            | 2.66             | <b>2.8E-03</b> | NDUFS5      | 10.06           | 1.88             | 5.7E-02        |
| PAM                      | 9.83            | 2.62             | <b>7.1E-03</b> | COX6C       | 10.35           | 1.88             | <b>3.2E-02</b> |
| TMEM141                  | 9.13            | 2.61             | <b>3.3E-03</b> | OCIAD2      | 8.55            | 1.86             | <b>3.2E-02</b> |
| B3GALTL                  | 9.50            | 2.61             | <b>1.0E-02</b> | ABAT        | 10.60           | 1.86             | <b>3.4E-02</b> |
| CTNND2                   | 8.20            | 2.55             | <b>2.6E-03</b> | ATP5A1      | 12.13           | 1.85             | <b>3.2E-02</b> |
| CMC2                     | 8.90            | 2.47             | <b>5.8E-03</b> | PDHA1       | 11.01           | 1.85             | <b>3.2E-02</b> |
| NENF                     | 9.44            | 2.44             | <b>1.7E-02</b> | SLC25A11    | 10.78           | 1.85             | <b>3.3E-02</b> |
| SMIM20                   | 9.02            | 2.44             | <b>6.4E-03</b> | PHB2        | 11.07           | 1.84             | <b>3.3E-02</b> |
| RAB9B                    | 9.54            | 2.43             | <b>2.8E-02</b> | MYPN        | 8.59            | 1.84             | <b>3.4E-02</b> |
| RAB27A                   | 9.22            | 2.42             | <b>1.8E-02</b> | ATP5B       | 12.14           | 1.84             | <b>3.3E-02</b> |
| NDUFA4                   | 10.86           | 2.40             | <b>4.7E-03</b> | Q69YL0      | 8.47            | 1.84             | <b>3.4E-02</b> |
| LYRM9                    | 8.31            | 2.40             | <b>4.8E-03</b> | NDUFB8      | 9.71            | 1.83             | 1.1E-01        |
| SH3KBP1                  | 9.10            | 2.37             | <b>8.2E-03</b> | COX7C       | 9.36            | 1.83             | 8.2E-02        |
| PTPRK                    | 8.98            | 2.35             | <b>8.8E-03</b> | NDUFA10     | 10.04           | 1.83             | 6.5E-02        |
| DHRS7B                   | 8.83            | 2.35             | <b>5.8E-03</b> | TIMM21      | 9.16            | 1.83             | <b>4.7E-02</b> |
| COA3                     | 9.55            | 2.30             | <b>3.9E-02</b> | NDUFB11     | 9.80            | 1.82             | 1.1E-01        |
| DNAJB11                  | 9.01            | 2.30             | <b>1.1E-02</b> | ATP5B       | 9.68            | 1.82             | 1.1E-01        |
| NRP2                     | 8.54            | 2.30             | <b>7.0E-03</b> | NDUFA11     | 9.81            | 1.82             | 1.2E-01        |
| COX14                    | 8.93            | 2.25             | <b>1.2E-02</b> | MINOS1;NBL1 | 9.42            | 1.82             | 8.4E-02        |
| ME3                      | 9.43            | 2.20             | <b>3.3E-02</b> | MRPL41      | 9.60            | 1.82             | 1.2E-01        |
| C10orf35                 | 8.95            | 2.17             | <b>1.6E-02</b> | D2HGDH      | 8.80            | 1.81             | <b>3.7E-02</b> |
| BDH1                     | 9.98            | 2.14             | <b>2.9E-02</b> | NDUFB2      | 8.52            | 1.81             | <b>3.7E-02</b> |
| PNKD                     | 9.19            | 2.11             | <b>2.0E-02</b> | A2M         | 10.21           | 1.81             | <b>3.9E-02</b> |
| ATP5E                    | 10.53           | 2.11             | <b>1.5E-02</b> | MGST1       | 8.98            | 1.80             | 5.1E-02        |
| C11orf83                 | 8.34            | 2.10             | <b>1.4E-02</b> | COX5B       | 10.26           | 1.80             | <b>4.1E-02</b> |
| ATP6V1G2;ATP6V1G2-DDX39B | 9.04            | 2.10             | <b>2.1E-02</b> | MAP1A       | 9.19            | 1.80             | 5.2E-02        |
| USMG5                    | 10.36           | 2.09             | <b>1.6E-02</b> | NDUFB5      | 9.63            | 1.79             | 1.2E-01        |
| CISD1                    | 10.66           | 2.09             | <b>1.5E-02</b> | CMC1        | 9.39            | 1.79             | 8.9E-02        |
| MP68;C14orf2             | 10.07           | 2.08             | <b>3.4E-02</b> | CAV1        | 10.71           | 1.79             | <b>3.9E-02</b> |
| ATP5L                    | 10.98           | 2.08             | <b>1.5E-02</b> | NDUFA1      | 9.03            | 1.79             | 5.3E-02        |
| PLCB1                    | 8.84            | 2.07             | <b>1.6E-02</b> | MT-CO2      | 10.62           | 1.79             | <b>4.2E-02</b> |
| ATP5I                    | 10.65           | 2.05             | <b>1.7E-02</b> | TMEM11      | 9.57            | 1.78             | 1.2E-01        |
| APOO                     | 9.90            | 2.05             | <b>3.8E-02</b> | MYBPC3      | 11.48           | 1.78             | <b>4.0E-02</b> |
|                          |                 |                  |                | GNG7        | 8.92            | 1.78             | 5.4E-02        |

|                      |       |      |                |          |       |      |         |
|----------------------|-------|------|----------------|----------|-------|------|---------|
| NDUFB4               | 10.13 | 1.78 | 7.3E-02        | SNAP91   | 10.05 | 1.59 | 1.1E-01 |
| ADCK3                | 9.98  | 1.77 | 7.5E-02        | MRPL50   | 9.39  | 1.59 | 1.4E-01 |
| ACSF2                | 10.75 | 1.77 | <b>4.1E-02</b> | MRPL43   | 9.84  | 1.59 | 1.1E-01 |
| CACNA2D2             | 9.02  | 1.76 | 5.6E-02        | SLC4A7   | 8.57  | 1.58 | 7.2E-02 |
| SDHB                 | 10.58 | 1.76 | <b>4.5E-02</b> | SAMM50   | 9.21  | 1.58 | 1.4E-01 |
| COX6B1               | 10.24 | 1.76 | <b>4.5E-02</b> | TMEM223  | 8.58  | 1.58 | 7.3E-02 |
| AGK                  | 9.36  | 1.75 | 9.7E-02        | NDUFA6   | 10.12 | 1.58 | 1.2E-01 |
| TMEM50B              | 8.43  | 1.75 | <b>4.5E-02</b> | MRPL47   | 9.68  | 1.57 | 1.8E-01 |
| NDUFB6               | 9.78  | 1.74 | 1.3E-01        | MRPL30   | 9.30  | 1.57 | 1.4E-01 |
| HADHB                | 11.24 | 1.74 | <b>4.5E-02</b> | SLC25A5  | 10.57 | 1.57 | 7.8E-02 |
| NDUFB7               | 9.86  | 1.74 | 8.0E-02        | ATPIF1   | 10.36 | 1.57 | 7.8E-02 |
| TIMM9                | 9.70  | 1.73 | 1.4E-01        | COX5A    | 10.44 | 1.57 | 7.8E-02 |
| NDUFB3               | 9.87  | 1.73 | 8.1E-02        | TIMM10   | 9.11  | 1.57 | 9.5E-02 |
| VDAC3                | 10.62 | 1.73 | <b>4.9E-02</b> | MT-CO3   | 9.03  | 1.56 | 9.6E-02 |
| COX7B                | 9.18  | 1.73 | 6.2E-02        | MRPL53   | 9.84  | 1.56 | 1.2E-01 |
| NDUFA3               | 9.33  | 1.72 | 1.0E-01        | EFNB1    | 8.92  | 1.56 | 9.7E-02 |
| PHB                  | 10.99 | 1.72 | <b>4.7E-02</b> | MRPL16   | 9.58  | 1.56 | 1.9E-01 |
| MPC1;BRP44L          | 9.50  | 1.72 | 1.0E-01        | NDUFC1   | 8.53  | 1.56 | 7.7E-02 |
| OCIAD1               | 9.53  | 1.71 | 1.4E-01        | LRRC4B   | 8.47  | 1.56 | 7.7E-02 |
| ROMO1                | 9.01  | 1.71 | 6.5E-02        | NDUFS8   | 10.20 | 1.56 | 8.0E-02 |
| NPTN                 | 10.40 | 1.71 | 5.3E-02        | TPR      | 9.05  | 1.55 | 9.8E-02 |
| HIBCH                | 10.74 | 1.70 | 5.0E-02        | NLRX1    | 8.41  | 1.55 | 7.8E-02 |
| NDUFA13;YJEFN3       | 10.22 | 1.70 | 5.4E-02        | SF3B14   | 9.58  | 1.55 | 1.9E-01 |
| MRPL28               | 9.37  | 1.70 | 1.1E-01        | FAM162A  | 10.49 | 1.55 | 8.2E-02 |
| NDUFS6               | 10.00 | 1.69 | 8.9E-02        | MRPL11   | 9.85  | 1.55 | 1.2E-01 |
| MRPL14               | 9.56  | 1.69 | 1.5E-01        | TMEM126A | 9.00  | 1.55 | 1.0E-01 |
| QIL1;C19orf70        | 9.73  | 1.69 | 1.5E-01        | NDUFS4   | 9.61  | 1.55 | 1.9E-01 |
| NDUFB10              | 10.21 | 1.69 | 5.5E-02        | CHCHD3   | 10.10 | 1.54 | 1.2E-01 |
| CA13                 | 8.50  | 1.69 | 5.3E-02        | MRPS7    | 9.79  | 1.54 | 1.9E-01 |
| NDUFB1               | 9.54  | 1.69 | 1.5E-01        | MRPS18C  | 8.88  | 1.54 | 1.0E-01 |
| COX4I1               | 10.81 | 1.69 | 5.2E-02        | OGDH     | 10.87 | 1.54 | 7.8E-02 |
| MED23                | 8.41  | 1.68 | 5.4E-02        | DNAJC19  | 9.36  | 1.54 | 1.5E-01 |
| NDUFA9               | 10.35 | 1.68 | 5.7E-02        | MRPL37   | 9.67  | 1.54 | 2.0E-01 |
| NDUFB9               | 10.00 | 1.68 | 9.2E-02        | MFF      | 9.33  | 1.54 | 1.5E-01 |
| DBT                  | 10.14 | 1.68 | 9.3E-02        | MRPS12   | 9.64  | 1.54 | 2.0E-01 |
| ALDH4A1              | 10.81 | 1.67 | 5.5E-02        | MTCH2    | 9.99  | 1.54 | 1.3E-01 |
| MRPL33               | 9.17  | 1.67 | 7.3E-02        | MRPL55   | 9.34  | 1.54 | 1.5E-01 |
| NDRG4                | 9.32  | 1.67 | 1.2E-01        | MRPL13   | 9.80  | 1.53 | 2.0E-01 |
| MRPL3                | 9.34  | 1.66 | 1.2E-01        | SCO2     | 8.63  | 1.53 | 8.2E-02 |
| MRPL23               | 9.70  | 1.66 | 1.6E-01        | ACOT13   | 10.93 | 1.53 | 8.1E-02 |
| MRPS36               | 9.92  | 1.66 | 9.6E-02        | MRPL45   | 9.62  | 1.53 | 2.0E-01 |
| SPTB                 | 10.55 | 1.66 | 6.1E-02        | MRPL22   | 9.56  | 1.52 | 2.0E-01 |
| NDUFC2;NDUFC2-KCTD14 | 10.05 | 1.67 | 9.4E-02        | MRPL51   | 8.97  | 1.52 | 1.1E-01 |
|                      |       |      |                | ALDH5A1  | 10.13 | 1.52 | 1.3E-01 |
| PC                   | 8.26  | 1.66 | 5.8E-02        | AMACR    | 8.65  | 1.52 | 8.5E-02 |
| NDUFA7               | 9.96  | 1.66 | 9.7E-02        | RPPI4    | 9.84  | 1.52 | 1.3E-01 |
| MRP63                | 9.28  | 1.65 | 1.2E-01        | SYNE1    | 9.49  | 1.52 | 1.6E-01 |
| RABGAP1L             | 8.97  | 1.65 | 7.7E-02        | COX7A2   | 9.54  | 1.52 | 2.0E-01 |
| MRPS21               | 9.26  | 1.64 | 1.2E-01        | MRPS24   | 9.49  | 1.52 | 1.6E-01 |
| OPA3                 | 9.72  | 1.64 | 1.6E-01        | PRKCDBP  | 9.37  | 1.51 | 1.6E-01 |
| MRPL17               | 9.69  | 1.64 | 1.6E-01        | ACAD9    | 10.11 | 1.51 | 1.3E-01 |
| MRPS14               | 9.54  | 1.64 | 1.6E-01        | MRPL27   | 9.71  | 1.51 | 2.1E-01 |
| C7orf55              | 9.08  | 1.64 | 7.9E-02        | EBP      | 9.47  | 1.51 | 1.6E-01 |
| MRPL9                | 9.75  | 1.64 | 1.6E-01        | SFRP1    | 9.57  | 1.51 | 2.1E-01 |
| SLC25A12             | 10.46 | 1.63 | 6.5E-02        | HADHA    | 11.48 | 1.51 | 8.6E-02 |
| NDUFA12              | 10.24 | 1.63 | 6.5E-02        | TIMM17B  | 8.78  | 1.51 | 8.8E-02 |
| MRPL35               | 8.80  | 1.63 | 6.3E-02        | MRPS5    | 9.45  | 1.51 | 1.6E-01 |
| C8orf82              | 9.78  | 1.63 | 1.7E-01        | PHF5A    | 9.37  | 1.50 | 1.6E-01 |
| DLST                 | 10.85 | 1.62 | 6.3E-02        | MRPL40   | 9.33  | 1.50 | 1.6E-01 |
| ATAD3A;ATAD3B        | 9.75  | 1.62 | 1.7E-01        | MRPL19   | 9.82  | 1.49 | 1.4E-01 |
| MRPL34               | 8.95  | 1.62 | 8.4E-02        | MRPS11   | 9.55  | 1.49 | 2.1E-01 |
| MRPL18               | 9.38  | 1.62 | 1.3E-01        | MRPL20   | 9.56  | 1.49 | 2.2E-01 |
| MRPL32               | 9.13  | 1.61 | 8.4E-02        | MRPL2    | 9.13  | 1.49 | 1.2E-01 |
| TOMM22               | 9.06  | 1.61 | 8.5E-02        | SF3B4    | 8.23  | 1.48 | 9.4E-02 |
| APOOL                | 9.25  | 1.61 | 1.3E-01        | MRPS6    | 9.78  | 1.48 | 2.2E-01 |
| PRKAG2               | 10.41 | 1.61 | 7.0E-02        | MTX2     | 9.15  | 1.48 | 1.2E-01 |
| CORO7;PAM16          | 9.46  | 1.60 | 1.3E-01        | SLC44A2  | 9.93  | 1.48 | 1.4E-01 |
| NNT                  | 10.97 | 1.60 | 6.8E-02        | MRPL49   | 9.75  | 1.48 | 2.2E-01 |
| SCO1                 | 9.51  | 1.59 | 1.4E-01        | MRPS33   | 9.51  | 1.48 | 1.7E-01 |
| ARMCX1               | 8.76  | 1.59 | 7.0E-02        | MRPS22   | 9.85  | 1.48 | 1.4E-01 |
| NDUFA8               | 10.14 | 1.59 | 1.1E-01        | MRPS16   | 9.71  | 1.48 | 2.2E-01 |
| MPC2                 | 9.94  | 1.59 | 1.1E-01        | CCDC141  | 9.73  | 1.48 | 2.2E-01 |

|                    |       |      |         |         |       |      |         |
|--------------------|-------|------|---------|---------|-------|------|---------|
| EDIL3              | 9.48  | 1.48 | 1.7E-01 | HIBADH  | 10.78 | 1.36 | 1.3E-01 |
| NPTN;DKFZp566H1924 | 9.64  | 1.47 | 2.2E-01 | UQCR11  | 8.64  | 1.36 | 1.3E-01 |
| MTX1               | 9.59  | 1.47 | 2.2E-01 | MRPS15  | 9.47  | 1.36 | 2.1E-01 |
| MRPL24             | 9.48  | 1.47 | 1.7E-01 | CLPP    | 9.65  | 1.36 | 2.7E-01 |
| MRPL44             | 9.43  | 1.47 | 1.8E-01 | IMMT    | 10.29 | 1.35 | 1.3E-01 |
| MLYCD              | 9.66  | 1.46 | 2.2E-01 | TMEM173 | 9.21  | 1.35 | 2.2E-01 |
| NADK2              | 9.48  | 1.46 | 1.8E-01 | ABCB7   | 8.69  | 1.35 | 1.3E-01 |
| MRPL21             | 9.54  | 1.46 | 2.2E-01 | DAP3    | 9.73  | 1.35 | 2.7E-01 |
| NDUFA5             | 10.24 | 1.46 | 1.0E-01 | MRPS9   | 9.50  | 1.35 | 2.2E-01 |
| NDUFAB1            | 9.48  | 1.46 | 1.8E-01 | SF3A2   | 9.18  | 1.35 | 1.6E-01 |
| SF3B5              | 9.46  | 1.45 | 1.8E-01 | FDX1L   | 8.67  | 1.34 | 1.3E-01 |
| SF3A3              | 9.55  | 1.45 | 2.3E-01 | INPP5A  | 8.76  | 1.34 | 1.3E-01 |
| VDAC1              | 10.90 | 1.45 | 1.0E-01 | FUNDCC2 | 10.08 | 1.34 | 1.9E-01 |
| DSC1               | 9.50  | 1.44 | 1.8E-01 | SYNJ2BP | 9.72  | 1.34 | 2.7E-01 |
| OSGEPL1            | 8.34  | 1.44 | 1.0E-01 | SFXN1   | 10.09 | 1.34 | 1.9E-01 |
| MTCH1              | 8.91  | 1.44 | 1.3E-01 | MRPL48  | 9.50  | 1.34 | 2.2E-01 |
| MRPL38             | 9.31  | 1.43 | 1.9E-01 | MTHFR   | 9.96  | 1.34 | 1.9E-01 |
| INPP1              | 8.90  | 1.43 | 1.3E-01 | TMPO    | 10.03 | 1.34 | 1.9E-01 |
| MRPS18B            | 10.32 | 1.43 | 1.1E-01 | NT5DC2  | 9.97  | 1.33 | 1.9E-01 |
| VDAC2              | 10.80 | 1.43 | 1.1E-01 | IGSF3   | 8.45  | 1.33 | 1.4E-01 |
| MRPL1              | 9.74  | 1.43 | 2.4E-01 | SARS2   | 9.75  | 1.33 | 2.8E-01 |
| MRPL39             | 9.62  | 1.43 | 2.4E-01 | SYNGR1  | 9.02  | 1.33 | 1.7E-01 |
| MRPS17             | 9.61  | 1.43 | 2.4E-01 | MRPS18A | 9.24  | 1.33 | 2.3E-01 |
| PDP1               | 9.65  | 1.42 | 2.4E-01 | UQCR10  | 9.97  | 1.33 | 1.9E-01 |
| ACADSB             | 10.44 | 1.42 | 1.1E-01 | PLGRKT  | 8.92  | 1.33 | 1.7E-01 |
| TSPO               | 9.08  | 1.42 | 1.3E-01 | MNF1    | 9.18  | 1.33 | 1.7E-01 |
| UQCRQ              | 10.17 | 1.42 | 1.1E-01 | NDUFV1  | 10.25 | 1.33 | 1.4E-01 |
| CD36               | 9.17  | 1.42 | 1.4E-01 | SORT1   | 9.03  | 1.32 | 1.7E-01 |
| NDUFA2             | 9.88  | 1.41 | 1.6E-01 | SELRC1  | 8.73  | 1.32 | 1.4E-01 |
| FKBP1B             | 8.20  | 1.41 | 1.1E-01 | HSDL1   | 10.45 | 1.32 | 1.4E-01 |
| MMAB               | 9.92  | 1.41 | 1.6E-01 | SRSF7   | 9.23  | 1.32 | 2.3E-01 |
| SNRNP70            | 9.03  | 1.41 | 1.4E-01 | UQCRC2  | 10.93 | 1.32 | 1.4E-01 |
| MRPS27             | 9.80  | 1.41 | 2.5E-01 | PRPF40A | 8.95  | 1.31 | 1.7E-01 |
| RDH14              | 9.98  | 1.41 | 1.6E-01 | MSMO1   | 9.08  | 1.31 | 1.7E-01 |
| TMEM14C            | 9.58  | 1.41 | 2.5E-01 | SLIRP   | 10.51 | 1.31 | 1.5E-01 |
| SLC25A24           | 10.04 | 1.41 | 1.6E-01 | ATP1B3  | 9.60  | 1.31 | 2.9E-01 |
| HIGD2A             | 9.32  | 1.41 | 2.0E-01 | SMIM12  | 9.00  | 1.31 | 1.8E-01 |
| PDE3A              | 8.56  | 1.41 | 1.1E-01 | MRPS25  | 9.80  | 1.31 | 2.9E-01 |
| MRPS31             | 9.45  | 1.40 | 2.0E-01 | PVR     | 9.16  | 1.31 | 1.8E-01 |
| MECR               | 9.67  | 1.40 | 2.5E-01 | SDHA    | 10.88 | 1.31 | 1.4E-01 |
| CCDC167            | 8.63  | 1.40 | 1.2E-01 | CCAR1   | 9.26  | 1.31 | 2.4E-01 |
| MFN2               | 9.76  | 1.40 | 2.5E-01 | MT-ND5  | 8.81  | 1.30 | 1.5E-01 |
| ALDOC              | 11.86 | 1.40 | 1.1E-01 | SNRPA1  | 9.59  | 1.30 | 2.9E-01 |
| PTRF               | 10.66 | 1.40 | 1.1E-01 | CYB5R3  | 11.29 | 1.30 | 1.4E-01 |
| PXMP2              | 8.35  | 1.39 | 1.2E-01 | ACSL1   | 10.56 | 1.30 | 1.5E-01 |
| PGRMC1             | 10.11 | 1.39 | 1.7E-01 | MRPS28  | 9.88  | 1.30 | 2.0E-01 |
| MRPL4              | 9.55  | 1.39 | 2.5E-01 | ATPAF2  | 9.48  | 1.30 | 2.4E-01 |
| TIMM50             | 9.84  | 1.39 | 1.7E-01 | PDHX    | 10.38 | 1.30 | 1.5E-01 |
| MRPS35             | 9.71  | 1.39 | 2.5E-01 | SF3B2   | 9.42  | 1.29 | 2.4E-01 |
| C4A;C4B            | 9.69  | 1.38 | 2.6E-01 | ETFA    | 11.41 | 1.29 | 1.5E-01 |
| STOML2             | 9.74  | 1.38 | 2.6E-01 | MRPS2   | 9.51  | 1.29 | 2.4E-01 |
| PTCD3              | 9.74  | 1.38 | 2.6E-01 | OXCT1   | 11.23 | 1.29 | 1.5E-01 |
| MT-ND4             | 9.33  | 1.38 | 2.0E-01 | OBSCN   | 10.35 | 1.28 | 1.6E-01 |
| HCN4               | 9.66  | 1.38 | 2.6E-01 | RABL3   | 9.38  | 1.28 | 2.4E-01 |
| NDUFS2             | 10.42 | 1.38 | 1.3E-01 | MRPL46  | 9.82  | 1.28 | 3.0E-01 |
| MRPS34             | 9.85  | 1.38 | 1.7E-01 | DNAJA3  | 8.73  | 1.28 | 1.6E-01 |
| PLN                | 10.22 | 1.38 | 1.3E-01 | SLC25A3 | 11.19 | 1.28 | 1.5E-01 |
| HSPA12A            | 8.70  | 1.38 | 1.2E-01 | HTATSF1 | 9.44  | 1.28 | 2.5E-01 |
| MRPS10             | 9.52  | 1.38 | 2.6E-01 | ACOT1   | 10.98 | 1.28 | 1.5E-01 |
| BNIP3              | 8.83  | 1.37 | 1.2E-01 | POPDC2  | 9.93  | 1.28 | 2.1E-01 |
| MRPS23             | 9.75  | 1.37 | 2.6E-01 | COQ6    | 9.84  | 1.28 | 2.1E-01 |
| NDUFS3             | 10.59 | 1.37 | 1.3E-01 | SMARCC2 | 8.92  | 1.28 | 1.9E-01 |
| PTPLB              | 8.25  | 1.37 | 1.3E-01 | COQ5    | 9.94  | 1.28 | 2.1E-01 |
| MFN1               | 9.59  | 1.37 | 2.6E-01 | PCCB    | 10.50 | 1.28 | 1.6E-01 |
| FAM210A            | 9.09  | 1.37 | 1.5E-01 | MT-ND2  | 9.04  | 1.27 | 1.9E-01 |
| MGST3              | 10.40 | 1.37 | 1.3E-01 | LYRM7   | 9.46  | 1.27 | 2.5E-01 |
| NDUFS7             | 9.82  | 1.37 | 1.8E-01 | PPA2    | 10.38 | 1.27 | 1.6E-01 |
| RAB24              | 9.48  | 1.36 | 2.1E-01 | PNPLA4  | 9.65  | 1.27 | 3.1E-01 |
| NDUFS1             | 10.63 | 1.36 | 1.2E-01 | COX7A2L | 8.90  | 1.27 | 1.9E-01 |
| PRDX1              | 11.89 | 1.36 | 1.3E-01 | SEMA4B  | 9.03  | 1.27 | 1.9E-01 |
| UQCRB              | 10.19 | 1.36 | 1.3E-01 | CAV2    | 9.66  | 1.26 | 3.1E-01 |
| TMEM126B           | 8.74  | 1.36 | 1.3E-01 | SDR39U1 | 9.83  | 1.26 | 2.2E-01 |

|                   |       |      |         |                    |       |      |         |
|-------------------|-------|------|---------|--------------------|-------|------|---------|
| SLC2A4            | 7.98  | 1.26 | 1.6E-01 | TRIM33             | 8.11  | 1.15 | 2.1E-01 |
| PGAM5             | 8.96  | 1.26 | 1.9E-01 | NIPSNAP3B          | 10.37 | 1.15 | 2.1E-01 |
| SF3B1             | 9.91  | 1.26 | 2.2E-01 | TXN2               | 10.00 | 1.15 | 2.6E-01 |
| HNRNPL            | 9.98  | 1.26 | 2.2E-01 | SLMAP              | 10.66 | 1.15 | 2.0E-01 |
| SLC25A10          | 9.76  | 1.25 | 3.1E-01 | CTSA               | 10.00 | 1.15 | 2.6E-01 |
| ACAT1             | 11.21 | 1.25 | 1.6E-01 | ATP1A2             | 8.98  | 1.15 | 2.5E-01 |
| ACAD8             | 10.07 | 1.25 | 2.2E-01 | ISOC2              | 10.36 | 1.15 | 2.1E-01 |
| SF3A1             | 9.45  | 1.25 | 2.6E-01 | CDH13              | 8.11  | 1.14 | 2.1E-01 |
| MARCH5            | 9.64  | 1.25 | 3.2E-01 | IDH3A              | 11.17 | 1.14 | 2.1E-01 |
| UQCC              | 9.43  | 1.25 | 2.6E-01 | ME2                | 10.59 | 1.14 | 2.2E-01 |
| SNRPE             | 9.75  | 1.25 | 3.2E-01 | TAPBP              | 8.83  | 1.14 | 2.1E-01 |
| TIMM13            | 9.78  | 1.25 | 3.2E-01 | PCBD2              | 9.20  | 1.14 | 3.1E-01 |
| RANBP2            | 9.47  | 1.25 | 2.6E-01 | ARSB               | 9.80  | 1.13 | 3.8E-01 |
| TIMM8A            | 10.01 | 1.25 | 2.2E-01 | PIGK               | 9.29  | 1.13 | 3.2E-01 |
| RALB              | 10.01 | 1.25 | 2.2E-01 | COA6               | 9.10  | 1.13 | 2.5E-01 |
| SPRYD4            | 10.15 | 1.24 | 2.2E-01 | IDH3G;hCG 2004980  | 10.62 | 1.13 | 2.2E-01 |
| SCCPDH            | 10.51 | 1.24 | 1.7E-01 | SRSF1              | 10.28 | 1.13 | 2.2E-01 |
| ICT1              | 9.44  | 1.24 | 2.6E-01 | SF3B3              | 9.97  | 1.13 | 2.7E-01 |
| MRPL15            | 9.52  | 1.24 | 2.6E-01 | RBM25              | 9.24  | 1.13 | 3.2E-01 |
| GCSH              | 9.35  | 1.24 | 2.6E-01 | ETFB               | 11.26 | 1.13 | 2.1E-01 |
| HCFC1             | 9.09  | 1.24 | 2.0E-01 | MTFR1L             | 9.28  | 1.12 | 3.2E-01 |
| WDR5              | 8.88  | 1.24 | 2.0E-01 | DLD                | 11.20 | 1.12 | 2.2E-01 |
| TMX4              | 9.87  | 1.23 | 2.3E-01 | GDPD1              | 8.77  | 1.12 | 2.2E-01 |
| MFGE8             | 10.57 | 1.23 | 1.8E-01 | NOP10              | 8.43  | 1.12 | 2.2E-01 |
| SNRPF             | 9.48  | 1.23 | 2.7E-01 | TMEM41B            | 9.08  | 1.12 | 2.6E-01 |
| TAMM41            | 8.77  | 1.23 | 1.8E-01 | C2orf47            | 9.69  | 1.12 | 3.8E-01 |
| PTP4A3            | 8.60  | 1.23 | 1.8E-01 | HK1                | 11.70 | 1.12 | 2.2E-01 |
| SLC25A6           | 11.47 | 1.22 | 1.7E-01 | ACYP2              | 9.54  | 1.12 | 3.9E-01 |
| GLB1              | 10.22 | 1.22 | 1.8E-01 | DPM3               | 9.32  | 1.12 | 3.2E-01 |
| KLHL31            | 8.44  | 1.21 | 1.8E-01 | HDHD3              | 10.19 | 1.12 | 2.3E-01 |
| LAMTOR4           | 9.28  | 1.21 | 2.8E-01 | AGPAT2             | 8.26  | 1.12 | 2.2E-01 |
| CLPTM1            | 8.70  | 1.21 | 1.8E-01 | SMIM7              | 8.48  | 1.11 | 2.3E-01 |
| NUBPL             | 9.88  | 1.21 | 2.4E-01 | CRELD1             | 9.01  | 1.11 | 2.6E-01 |
| UQCRFS1;UQCRFS1P1 | 10.29 | 1.21 | 1.9E-01 | SNRPD2             | 10.19 | 1.11 | 2.3E-01 |
| RHOT1             | 9.73  | 1.21 | 3.4E-01 | TBL1XR1            | 9.55  | 1.11 | 3.9E-01 |
| PPP1R3E           | 8.59  | 1.21 | 1.8E-01 | MMAA               | 8.47  | 1.11 | 2.3E-01 |
| NME3              | 9.74  | 1.20 | 3.4E-01 | HMGN3              | 8.68  | 1.11 | 2.3E-01 |
| RPN2              | 8.86  | 1.20 | 2.2E-01 | HDAC2              | 9.72  | 1.11 | 3.9E-01 |
| PRKAR2B           | 10.48 | 1.20 | 1.9E-01 | CCDC47             | 8.95  | 1.11 | 2.6E-01 |
| SNRPG             | 9.76  | 1.20 | 3.4E-01 | ETFDH              | 10.37 | 1.11 | 2.3E-01 |
| SNRPB2            | 9.69  | 1.20 | 3.4E-01 | NUDT19             | 8.95  | 1.11 | 2.6E-01 |
| FXN               | 9.58  | 1.20 | 3.4E-01 | MXRA7              | 10.07 | 1.11 | 2.8E-01 |
| CYC1              | 10.27 | 1.20 | 1.9E-01 | NDUFAF2            | 9.54  | 1.11 | 3.9E-01 |
| TMEM97            | 9.71  | 1.20 | 3.4E-01 | LAMTOR1            | 9.90  | 1.10 | 2.8E-01 |
| HSD17B12          | 10.64 | 1.19 | 1.8E-01 | CDS2               | 8.93  | 1.10 | 2.7E-01 |
| FUCA1             | 9.15  | 1.19 | 2.2E-01 | CDH2               | 10.23 | 1.10 | 2.4E-01 |
| COQ7              | 10.03 | 1.19 | 2.5E-01 | GNB2               | 10.84 | 1.10 | 2.2E-01 |
| CHCHD1            | 8.78  | 1.19 | 1.9E-01 | PTRH2              | 9.26  | 1.10 | 3.3E-01 |
| PDK2              | 9.50  | 1.19 | 2.9E-01 | SLC8A1             | 10.64 | 1.10 | 2.3E-01 |
| UQCRC1            | 10.72 | 1.19 | 1.9E-01 | JUP                | 10.41 | 1.10 | 2.4E-01 |
| FARP1             | 10.08 | 1.19 | 2.5E-01 | PGM5               | 10.98 | 1.10 | 2.3E-01 |
| LHPP              | 9.36  | 1.18 | 2.9E-01 | ABHD10             | 10.13 | 1.10 | 2.9E-01 |
| DPP7              | 9.77  | 1.18 | 3.5E-01 | UQCRH              | 9.20  | 1.10 | 3.3E-01 |
| BCAS2             | 8.60  | 1.18 | 1.9E-01 | CMAS               | 9.47  | 1.10 | 3.3E-01 |
| GHITM             | 8.19  | 1.18 | 2.0E-01 | PCCA               | 10.56 | 1.09 | 2.4E-01 |
| FIS1              | 10.32 | 1.18 | 2.0E-01 | GOLGA7             | 8.94  | 1.09 | 2.7E-01 |
| NDUFV2            | 10.14 | 1.18 | 2.5E-01 | ACP6               | 9.00  | 1.09 | 2.7E-01 |
| PBXIP1            | 9.18  | 1.18 | 2.3E-01 | HYI                | 9.10  | 1.09 | 2.7E-01 |
| EMC7              | 9.01  | 1.18 | 2.3E-01 | CTNNA2             | 9.16  | 1.09 | 2.7E-01 |
| PRPF19            | 9.96  | 1.18 | 2.5E-01 | PDZD11             | 9.29  | 1.09 | 3.4E-01 |
| COQ3              | 9.53  | 1.18 | 3.5E-01 | HP1BP3             | 9.61  | 1.09 | 4.0E-01 |
| MCEE              | 9.58  | 1.18 | 3.5E-01 | ENDOG              | 9.49  | 1.09 | 3.4E-01 |
| C18orf32          | 8.93  | 1.17 | 2.3E-01 | LPCAT4             | 8.95  | 1.09 | 2.8E-01 |
| TOMM70A           | 9.98  | 1.17 | 2.5E-01 | GLRX5              | 9.70  | 1.08 | 4.0E-01 |
| EPDR1             | 9.67  | 1.17 | 3.6E-01 | PTDSS1             | 8.45  | 1.08 | 2.4E-01 |
| FDXR              | 9.29  | 1.17 | 3.0E-01 | TMLHE              | 9.88  | 1.08 | 3.0E-01 |
| CHCHD7            | 8.59  | 1.17 | 2.0E-01 | BET1;DKFZp781C0425 | 9.06  | 1.08 | 2.8E-01 |
| MGST2             | 9.30  | 1.16 | 3.0E-01 | VAPB               | 9.88  | 1.08 | 3.0E-01 |
| PPOX              | 9.17  | 1.16 | 2.4E-01 | MLEC               | 10.21 | 1.08 | 2.5E-01 |
| PICK1             | 8.66  | 1.16 | 2.1E-01 | BAG2               | 9.97  | 1.08 | 3.0E-01 |
| CPNE5             | 9.82  | 1.16 | 2.6E-01 | MCCC1              | 10.05 | 1.08 | 3.0E-01 |
| COQ9              | 10.36 | 1.16 | 2.1E-01 | VCAM1              | 9.26  | 1.08 | 3.4E-01 |

|                                                            |       |      |         |               |       |      |         |
|------------------------------------------------------------|-------|------|---------|---------------|-------|------|---------|
| GCAT                                                       | 9.95  | 1.08 | 3.0E-01 | RAB23         | 9.12  | 0.98 | 3.4E-01 |
| ATP2B4                                                     | 11.37 | 1.08 | 2.4E-01 | PAK1          | 8.59  | 0.98 | 3.0E-01 |
| CISD2                                                      | 10.18 | 1.08 | 2.5E-01 | TIMM8B        | 9.30  | 0.98 | 4.0E-01 |
| RHOT2                                                      | 9.10  | 1.07 | 2.8E-01 | CYB5A         | 10.35 | 0.98 | 3.0E-01 |
| MTIF2                                                      | 9.00  | 1.07 | 2.8E-01 | HIST1H1A      | 8.47  | 0.98 | 3.0E-01 |
| OGDH                                                       | 9.10  | 1.07 | 2.8E-01 | HIGD1A        | 9.50  | 0.98 | 4.0E-01 |
| FKBP8                                                      | 9.26  | 1.07 | 3.5E-01 | PEX14         | 8.50  | 0.98 | 3.0E-01 |
| CRMP1                                                      | 10.29 | 1.07 | 2.5E-01 | CLPX          | 9.19  | 0.98 | 3.4E-01 |
| NIPSNAP1                                                   | 10.64 | 1.07 | 2.4E-01 | GPAA1         | 8.75  | 0.98 | 3.0E-01 |
| SNRPD1                                                     | 9.97  | 1.07 | 3.0E-01 | AMT           | 9.85  | 0.98 | 3.5E-01 |
| SFPQ                                                       | 10.79 | 1.06 | 2.4E-01 | FLOT1         | 10.32 | 0.98 | 3.0E-01 |
| DHCR7                                                      | 9.22  | 1.06 | 3.5E-01 | HNRNPH3       | 8.86  | 0.97 | 3.4E-01 |
| SRSF4                                                      | 9.26  | 1.06 | 3.6E-01 | CTNNB1        | 10.38 | 0.97 | 3.0E-01 |
| MTFP1                                                      | 8.73  | 1.06 | 2.5E-01 | PRKAB2        | 10.09 | 0.97 | 3.5E-01 |
| EARS2                                                      | 9.38  | 1.05 | 3.6E-01 | ERLIN2        | 10.01 | 0.97 | 3.5E-01 |
| PRAF2;WDR45                                                | 9.69  | 1.05 | 4.2E-01 | GM2A          | 9.72  | 0.97 | 4.7E-01 |
| COX20                                                      | 9.06  | 1.05 | 3.0E-01 | MATR3         | 9.87  | 0.97 | 3.6E-01 |
| PTGES2                                                     | 10.40 | 1.05 | 2.6E-01 | ME1           | 9.94  | 0.97 | 3.6E-01 |
| LETM1                                                      | 10.18 | 1.05 | 2.6E-01 | ISCA2         | 9.58  | 0.97 | 4.7E-01 |
| SLC25A1                                                    | 9.67  | 1.05 | 4.2E-01 | ALDH2         | 11.10 | 0.97 | 2.9E-01 |
| ATP13A1                                                    | 9.36  | 1.05 | 3.6E-01 | LRPPRC        | 11.06 | 0.97 | 2.9E-01 |
| STBD1                                                      | 10.05 | 1.05 | 3.1E-01 | SPATA20       | 9.53  | 0.97 | 4.7E-01 |
| AIFM1                                                      | 11.14 | 1.05 | 2.5E-01 | SNRPD3        | 10.23 | 0.96 | 3.1E-01 |
| MT-CYB                                                     | 8.63  | 1.04 | 2.6E-01 | BCL2L13       | 9.56  | 0.96 | 4.8E-01 |
| NDUFAF3                                                    | 9.69  | 1.04 | 4.3E-01 | LAMTOR3       | 9.57  | 0.96 | 4.8E-01 |
| SNRPA                                                      | 9.67  | 1.04 | 4.3E-01 | ECI2          | 10.46 | 0.96 | 3.1E-01 |
| CBR4                                                       | 10.06 | 1.04 | 3.2E-01 | HNRNPA2B1     | 10.52 | 0.96 | 3.1E-01 |
| EPB41L3                                                    | 10.42 | 1.04 | 2.7E-01 | CDK5RAP3      | 9.32  | 0.96 | 4.1E-01 |
| CYB5B                                                      | 10.12 | 1.04 | 3.2E-01 | AK2           | 10.94 | 0.95 | 3.0E-01 |
| LGALS3                                                     | 10.91 | 1.03 | 2.6E-01 | RYR2          | 10.88 | 0.95 | 3.0E-01 |
| DARS2                                                      | 10.15 | 1.03 | 3.2E-01 | RCN2          | 9.12  | 0.95 | 3.5E-01 |
| RRAD                                                       | 9.63  | 1.03 | 4.3E-01 | EMD           | 9.85  | 0.95 | 3.6E-01 |
| ZADH2                                                      | 9.71  | 1.03 | 4.3E-01 | UBXN4         | 9.52  | 0.95 | 4.2E-01 |
| OPA1                                                       | 10.60 | 1.03 | 2.7E-01 | SCAMP1        | 9.68  | 0.95 | 4.8E-01 |
| SYPL1                                                      | 9.26  | 1.03 | 3.7E-01 | AKR1A1        | 11.14 | 0.95 | 3.0E-01 |
| NDUFAF4                                                    | 9.71  | 1.03 | 4.4E-01 | HNRNPH2       | 9.59  | 0.95 | 4.8E-01 |
| SSBP1                                                      | 10.97 | 1.03 | 2.6E-01 | HINT2         | 10.27 | 0.95 | 3.2E-01 |
| TFAM                                                       | 10.25 | 1.03 | 2.7E-01 | TMED5         | 9.19  | 0.95 | 3.5E-01 |
| GSTZ1                                                      | 9.82  | 1.02 | 3.3E-01 | C11orf58;SMAP | 9.47  | 0.95 | 4.2E-01 |
| GLIPR2                                                     | 9.29  | 1.02 | 3.8E-01 | ORMDL3        | 9.08  | 0.95 | 3.5E-01 |
| CACNB2                                                     | 8.36  | 1.02 | 2.7E-01 | ACAA2         | 10.98 | 0.95 | 3.0E-01 |
| QPRT                                                       | 10.76 | 1.02 | 2.7E-01 | C6orf136      | 8.61  | 0.95 | 3.2E-01 |
| MRPS26                                                     | 9.34  | 1.01 | 3.8E-01 | EMC2          | 9.07  | 0.95 | 3.6E-01 |
| SMCHD1                                                     | 9.03  | 1.01 | 3.2E-01 | GNB1          | 10.29 | 0.95 | 3.2E-01 |
| SLC16A7                                                    | 8.96  | 1.01 | 3.2E-01 | HSD17B8       | 10.32 | 0.95 | 3.2E-01 |
| P DPR                                                      | 9.86  | 1.01 | 3.3E-01 | DHRS7         | 9.46  | 0.94 | 4.2E-01 |
| LAMTOR2                                                    | 9.69  | 1.01 | 4.5E-01 | GSK3B         | 8.67  | 0.94 | 3.2E-01 |
| CHCHD2;CHCHD2P9                                            | 9.23  | 1.01 | 3.8E-01 | NONO          | 10.77 | 0.94 | 3.1E-01 |
| PARS2                                                      | 9.00  | 1.01 | 3.2E-01 | FLOT2         | 10.13 | 0.94 | 3.7E-01 |
| MCCC2                                                      | 10.27 | 1.00 | 2.9E-01 | C14orf1       | 9.02  | 0.94 | 3.6E-01 |
| CDC73                                                      | 8.72  | 1.00 | 2.8E-01 | CRAT          | 10.64 | 0.94 | 3.1E-01 |
| BVES                                                       | 9.89  | 1.00 | 3.4E-01 | CPD           | 8.88  | 0.94 | 3.6E-01 |
| EMC1                                                       | 9.41  | 1.00 | 3.9E-01 | EMC10         | 8.11  | 0.94 | 3.2E-01 |
| SIRT3                                                      | 9.73  | 1.00 | 4.5E-01 | ITGA7         | 10.56 | 0.94 | 3.2E-01 |
| TMED4                                                      | 9.70  | 1.00 | 4.5E-01 | DLAT          | 10.97 | 0.94 | 3.1E-01 |
| C6orf203                                                   | 9.16  | 1.00 | 3.3E-01 | LARS2         | 9.39  | 0.94 | 4.2E-01 |
| SUCLG1                                                     | 10.99 | 1.00 | 2.8E-01 | CIRBP         | 10.19 | 0.94 | 3.2E-01 |
| HADH                                                       | 11.17 | 1.00 | 2.8E-01 | CLPB          | 9.56  | 0.94 | 4.9E-01 |
| IDH3B                                                      | 10.88 | 1.00 | 2.8E-01 | TACO1         | 9.93  | 0.94 | 3.7E-01 |
| CNTNAP1                                                    | 8.85  | 0.99 | 2.9E-01 | TOP1          | 8.99  | 0.94 | 3.6E-01 |
| HTRA2                                                      | 9.85  | 0.99 | 3.4E-01 | EMC8          | 9.10  | 0.94 | 3.6E-01 |
| CS                                                         | 11.69 | 0.99 | 2.8E-01 | CNRIP1        | 10.02 | 0.93 | 3.7E-01 |
| CYCS                                                       | 11.72 | 0.99 | 2.8E-01 | CUX1          | 8.32  | 0.93 | 3.2E-01 |
| ACO2                                                       | 11.75 | 0.99 | 2.8E-01 | CDC5L         | 8.46  | 0.93 | 3.2E-01 |
| PCDHB8;PCDHB6;PCDHB7<br>;PCDHB4;PCDHB5;PCDHB<br>13;PCDHB10 | 8.44  | 0.99 | 2.9E-01 | MRE11A        | 9.02  | 0.93 | 3.7E-01 |
|                                                            |       |      |         | MANBAL        | 8.62  | 0.93 | 3.3E-01 |
|                                                            |       |      |         | SUN2          | 9.17  | 0.93 | 3.7E-01 |
| BCKDHB                                                     | 9.55  | 0.99 | 4.6E-01 | GAA           | 9.95  | 0.93 | 3.8E-01 |
| FDX1                                                       | 9.25  | 0.99 | 4.0E-01 | SLC25A4       | 10.99 | 0.93 | 3.2E-01 |
| HCCS                                                       | 9.24  | 0.99 | 4.0E-01 | ABCC1         | 8.40  | 0.93 | 3.3E-01 |
| VAMP3                                                      | 9.81  | 0.98 | 4.6E-01 | BCKDHA        | 9.84  | 0.93 | 3.8E-01 |
| B2M                                                        | 9.86  | 0.98 | 3.5E-01 | MYL4          | 12.09 | 0.93 | 3.2E-01 |

|                   |       |      |         |          |       |      |         |
|-------------------|-------|------|---------|----------|-------|------|---------|
| CAMK2A            | 8.95  | 0.93 | 3.7E-01 | HIP1R    | 8.81  | 0.85 | 3.8E-01 |
| GOT2              | 11.67 | 0.93 | 3.2E-01 | FAM213A  | 10.58 | 0.85 | 3.8E-01 |
| IRF2BP1           | 8.87  | 0.93 | 3.7E-01 | VIM      | 10.79 | 0.85 | 3.7E-01 |
| RFTN1             | 8.92  | 0.93 | 3.7E-01 | ACOX3    | 9.57  | 0.84 | 5.5E-01 |
| FITM2             | 9.18  | 0.93 | 3.7E-01 | PNPLA6   | 9.16  | 0.84 | 4.3E-01 |
| RTN4IP1           | 9.16  | 0.93 | 3.7E-01 | KIAA0391 | 8.68  | 0.84 | 3.8E-01 |
| FAM136A           | 10.04 | 0.92 | 3.8E-01 | CLGN     | 9.76  | 0.84 | 5.5E-01 |
| AK3               | 11.00 | 0.92 | 3.2E-01 | RBP1     | 10.68 | 0.84 | 3.7E-01 |
| PCYOX1L           | 9.51  | 0.92 | 4.3E-01 | JAGN1    | 9.25  | 0.84 | 4.9E-01 |
| NARS2             | 9.24  | 0.92 | 4.4E-01 | EHD2     | 9.91  | 0.84 | 4.3E-01 |
| DDRGK1            | 9.36  | 0.92 | 4.4E-01 | DIABLO   | 10.58 | 0.84 | 3.9E-01 |
| TMEM65            | 10.44 | 0.92 | 3.4E-01 | ABCD3    | 9.34  | 0.84 | 4.9E-01 |
| AK1               | 11.23 | 0.91 | 3.2E-01 | CAMK1D   | 8.38  | 0.84 | 3.9E-01 |
| KDM1A             | 8.87  | 0.91 | 3.8E-01 | HSD17B10 | 11.14 | 0.84 | 3.7E-01 |
| TMTC3             | 8.92  | 0.91 | 3.8E-01 | SPATS2L  | 9.35  | 0.84 | 4.9E-01 |
| NCAM1             | 11.12 | 0.91 | 3.3E-01 | CIQBP    | 10.41 | 0.83 | 3.9E-01 |
| TAX1BP3           | 9.84  | 0.91 | 3.9E-01 | VMA21    | 9.36  | 0.83 | 4.9E-01 |
| GNA11             | 10.08 | 0.91 | 3.9E-01 | CYP51A1  | 9.76  | 0.83 | 5.6E-01 |
| ACADVL            | 11.33 | 0.91 | 3.3E-01 | GTF3C1   | 8.86  | 0.83 | 3.9E-01 |
| CKAP4             | 10.98 | 0.91 | 3.3E-01 | MDH2     | 12.19 | 0.83 | 3.8E-01 |
| HAX1              | 8.95  | 0.91 | 3.8E-01 | PARVB    | 8.11  | 0.83 | 3.9E-01 |
| PIGT              | 9.63  | 0.91 | 5.1E-01 | ASAH1    | 11.19 | 0.83 | 3.8E-01 |
| SIRT5             | 9.48  | 0.91 | 4.4E-01 | PTGFRN   | 10.65 | 0.83 | 3.8E-01 |
| PIGS              | 9.63  | 0.91 | 5.1E-01 | MYEF2    | 8.23  | 0.83 | 3.9E-01 |
| GTF3C4            | 8.75  | 0.90 | 3.4E-01 | TMEM245  | 9.80  | 0.83 | 5.6E-01 |
| NUDT3             | 8.96  | 0.90 | 3.9E-01 | CCBL2    | 9.69  | 0.83 | 5.6E-01 |
| GABARAP;GABARAPL1 | 9.12  | 0.90 | 3.9E-01 | PDS5A    | 8.99  | 0.83 | 4.4E-01 |
| TST               | 10.32 | 0.90 | 3.5E-01 | LYRM4    | 9.18  | 0.82 | 4.4E-01 |
| CACNA2D1          | 9.82  | 0.90 | 5.2E-01 | GBAS     | 9.14  | 0.82 | 4.4E-01 |
| CAMK2G            | 8.61  | 0.90 | 3.5E-01 | ECHS1    | 11.19 | 0.82 | 3.8E-01 |
| HDGFRP2           | 8.95  | 0.90 | 3.9E-01 | SKIV2L2  | 8.59  | 0.82 | 4.0E-01 |
| FAM129A           | 9.93  | 0.90 | 4.0E-01 | GTF3C3   | 7.94  | 0.82 | 4.0E-01 |
| NFIA              | 9.30  | 0.89 | 4.5E-01 | HIST1H1D | 9.46  | 0.82 | 5.0E-01 |
| SUCLA2            | 11.07 | 0.89 | 3.4E-01 | SLC35A4  | 10.14 | 0.82 | 4.4E-01 |
| SPR               | 9.71  | 0.89 | 5.2E-01 | AFG3L2   | 10.42 | 0.82 | 4.0E-01 |
| LSS               | 10.31 | 0.89 | 3.6E-01 | C7orf50  | 8.74  | 0.82 | 4.0E-01 |
| GPD2              | 9.62  | 0.89 | 5.2E-01 | PLEKHA5  | 9.50  | 0.82 | 5.0E-01 |
| VAPA              | 10.56 | 0.89 | 3.6E-01 | MRC2     | 9.67  | 0.82 | 5.7E-01 |
| FAM3C             | 9.24  | 0.89 | 4.6E-01 | CANX     | 11.18 | 0.81 | 3.9E-01 |
| TUFM              | 11.60 | 0.88 | 3.4E-01 | ZMPSTE24 | 8.36  | 0.81 | 4.0E-01 |
| CNN1              | 10.68 | 0.88 | 3.4E-01 | HSPD1    | 12.00 | 0.81 | 3.9E-01 |
| SNRPN;SNRNPB      | 9.79  | 0.88 | 5.3E-01 | ARVCF    | 9.51  | 0.81 | 5.1E-01 |
| SLC2A14;SLC2A3    | 8.94  | 0.88 | 4.0E-01 | RDH13    | 9.66  | 0.81 | 5.7E-01 |
| STX7              | 9.95  | 0.88 | 4.1E-01 | ISCA1    | 8.48  | 0.81 | 4.1E-01 |
| GCDH              | 9.80  | 0.88 | 5.3E-01 | MAGED1   | 8.45  | 0.81 | 4.1E-01 |
| SPHKAP            | 9.46  | 0.87 | 4.7E-01 | GUF1     | 8.46  | 0.81 | 4.1E-01 |
| LNP               | 9.89  | 0.87 | 4.1E-01 | EPN3     | 8.42  | 0.81 | 4.1E-01 |
| TSTD1             | 9.62  | 0.87 | 5.3E-01 | PEX11B   | 9.31  | 0.81 | 5.1E-01 |
| DHRS4             | 9.64  | 0.87 | 5.3E-01 | HNRNPA3  | 9.65  | 0.81 | 5.8E-01 |
| MCM5              | 9.59  | 0.87 | 5.3E-01 | UFL1     | 9.75  | 0.80 | 5.8E-01 |
| CDIPT             | 9.67  | 0.87 | 5.3E-01 | STXBP3   | 9.18  | 0.80 | 4.5E-01 |
| NEXN              | 9.85  | 0.87 | 4.1E-01 | PREB     | 8.81  | 0.80 | 4.1E-01 |
| RFC5              | 8.70  | 0.87 | 3.7E-01 | IDH2     | 12.04 | 0.80 | 4.0E-01 |
| CTNNA1            | 10.50 | 0.87 | 3.7E-01 | SUCLG2   | 10.70 | 0.80 | 4.0E-01 |
| SUPV3L1           | 8.94  | 0.87 | 4.1E-01 | GNG12    | 9.95  | 0.80 | 4.6E-01 |
| SRSF6             | 8.95  | 0.87 | 4.1E-01 | AQP1     | 9.77  | 0.80 | 5.8E-01 |
| RBM26             | 8.80  | 0.86 | 3.7E-01 | DMD      | 10.07 | 0.80 | 4.6E-01 |
| BCS1L             | 9.07  | 0.86 | 4.1E-01 | ATP6AP1  | 8.89  | 0.80 | 4.6E-01 |
| MT-ND1            | 8.24  | 0.86 | 3.7E-01 | ERGIC3   | 9.37  | 0.80 | 5.2E-01 |
| ZFP62             | 9.17  | 0.86 | 4.2E-01 | MACROD1  | 10.12 | 0.80 | 4.6E-01 |
| PRR14L            | 8.91  | 0.86 | 4.2E-01 | AARS2    | 9.45  | 0.79 | 5.2E-01 |
| HNRNPA0           | 10.06 | 0.86 | 4.2E-01 | GNB4     | 9.01  | 0.79 | 4.6E-01 |
| ARMC1             | 9.75  | 0.86 | 5.4E-01 | ERBB2    | 9.37  | 0.79 | 5.2E-01 |
| MTIF3             | 9.03  | 0.85 | 4.2E-01 | ALDH6A1  | 10.81 | 0.79 | 4.1E-01 |
| NDUFAF7           | 9.09  | 0.85 | 4.2E-01 | STX4     | 9.25  | 0.79 | 5.2E-01 |
| MAP1LC3A          | 9.73  | 0.85 | 5.5E-01 | NCLN     | 9.56  | 0.79 | 5.9E-01 |
| CHD4              | 9.37  | 0.85 | 4.8E-01 | ATP6V0C  | 9.61  | 0.79 | 5.9E-01 |
| NAT14             | 8.68  | 0.85 | 3.8E-01 | DCAKD    | 9.57  | 0.79 | 5.9E-01 |
| MVK               | 9.11  | 0.85 | 4.2E-01 | FECH     | 10.03 | 0.79 | 4.7E-01 |
| SPG7              | 8.90  | 0.85 | 4.2E-01 | MSRB2    | 9.56  | 0.78 | 5.9E-01 |
| ATP13A3           | 8.14  | 0.85 | 3.8E-01 | HSPA9    | 11.52 | 0.78 | 4.1E-01 |
| RPN1              | 11.04 | 0.85 | 3.7E-01 | SRSF3    | 10.04 | 0.78 | 4.7E-01 |

|             |       |      |         |                        |       |      |         |
|-------------|-------|------|---------|------------------------|-------|------|---------|
| GNAS        | 10.09 | 0.78 | 4.7E-01 | TMEM33                 | 9.51  | 0.71 | 5.8E-01 |
| HNRNPH1     | 10.47 | 0.78 | 4.3E-01 | IBA57                  | 9.64  | 0.71 | 6.5E-01 |
| C14orf159   | 10.41 | 0.78 | 4.3E-01 | GLS                    | 9.76  | 0.70 | 6.5E-01 |
| GBAS        | 11.05 | 0.78 | 4.2E-01 | MCAT                   | 8.87  | 0.70 | 5.3E-01 |
| FAHD1       | 10.51 | 0.77 | 4.3E-01 | VSTM2L                 | 9.11  | 0.70 | 5.3E-01 |
| IRF2BPL     | 9.59  | 0.77 | 6.0E-01 | GOLT1B                 | 8.97  | 0.62 | 6.0E-01 |
| ATP6V0D1    | 9.59  | 0.77 | 6.0E-01 | STX12                  | 9.37  | 0.62 | 6.5E-01 |
| HIST1H1B    | 10.45 | 0.77 | 4.4E-01 | DHTKD1                 | 9.63  | 0.62 | 7.1E-01 |
| CDKN2AIP    | 9.40  | 0.77 | 5.4E-01 | CAMK2D                 | 8.99  | 0.62 | 6.0E-01 |
| FMR1        | 8.73  | 0.77 | 4.3E-01 | TJP2                   | 9.68  | 0.62 | 7.1E-01 |
| NES         | 10.14 | 0.77 | 4.8E-01 | ARL6IP5                | 10.79 | 0.62 | 5.4E-01 |
| ARL5A       | 8.54  | 0.77 | 4.4E-01 | C16orf58               | 8.82  | 0.61 | 5.6E-01 |
| HNRNPU      | 10.43 | 0.77 | 4.4E-01 | LIN7A                  | 9.17  | 0.61 | 6.0E-01 |
| KHDRBS1     | 10.41 | 0.77 | 4.4E-01 | COX17                  | 9.97  | 0.61 | 5.9E-01 |
| CLPTM1L     | 8.62  | 0.77 | 4.4E-01 | CPSF7                  | 9.50  | 0.61 | 6.5E-01 |
| WARS2       | 8.93  | 0.76 | 4.8E-01 | MARC2                  | 9.41  | 0.61 | 6.5E-01 |
| PDE4D       | 10.25 | 0.76 | 4.4E-01 | HRSP12                 | 9.86  | 0.61 | 5.9E-01 |
| TSFM        | 10.12 | 0.76 | 4.8E-01 | DAAM1                  | 8.46  | 0.61 | 5.6E-01 |
| PMVK        | 10.44 | 0.76 | 4.4E-01 | FUS                    | 9.64  | 0.61 | 7.2E-01 |
| ATPAF1      | 9.57  | 0.76 | 6.1E-01 | RALA                   | 9.75  | 0.61 | 7.2E-01 |
| GATM        | 10.17 | 0.76 | 4.4E-01 | ILF2                   | 10.47 | 0.61 | 5.6E-01 |
| ACOT9       | 10.91 | 0.76 | 4.3E-01 | DNAJC5                 | 9.12  | 0.61 | 6.1E-01 |
| CTNNA3      | 10.36 | 0.76 | 4.5E-01 | RBBP4                  | 10.07 | 0.61 | 5.9E-01 |
| RAP2A;RAP2B | 8.75  | 0.76 | 4.4E-01 | DDX5                   | 10.28 | 0.61 | 5.6E-01 |
| NIPSNAP3A   | 10.77 | 0.76 | 4.3E-01 | RMDN1                  | 10.54 | 0.61 | 5.6E-01 |
| SEC61G      | 8.84  | 0.76 | 4.4E-01 | ANO6                   | 8.85  | 0.61 | 5.6E-01 |
| PRDX3       | 11.42 | 0.76 | 4.3E-01 | ACSS3                  | 9.21  | 0.61 | 6.5E-01 |
| ELOVL5      | 8.28  | 0.75 | 4.5E-01 | LGALS3BP               | 10.13 | 0.61 | 5.9E-01 |
| ERBB2IP     | 8.41  | 0.75 | 4.5E-01 | ADPRHL1                | 10.63 | 0.61 | 5.7E-01 |
| ARL8B       | 10.02 | 0.75 | 4.9E-01 | FBXO30                 | 8.36  | 0.61 | 5.7E-01 |
| CRNKL1      | 9.18  | 0.75 | 4.9E-01 | NDUFV3                 | 9.05  | 0.60 | 6.1E-01 |
| PRKAA1      | 10.19 | 0.75 | 4.5E-01 | SRSF5                  | 9.18  | 0.60 | 6.1E-01 |
| NKX2-5      | 8.41  | 0.75 | 4.5E-01 | CLTB                   | 9.89  | 0.60 | 5.9E-01 |
| CHMP6       | 9.40  | 0.75 | 5.5E-01 | RPA2                   | 9.98  | 0.60 | 5.9E-01 |
| BCAT2       | 10.37 | 0.74 | 4.6E-01 | NUDT21                 | 10.30 | 0.60 | 5.7E-01 |
| QRSL1       | 8.48  | 0.74 | 4.5E-01 | PSPC1                  | 10.07 | 0.60 | 5.9E-01 |
| THYN1       | 9.78  | 0.74 | 6.2E-01 | H1FO                   | 10.71 | 0.60 | 5.5E-01 |
| ABHD11      | 10.02 | 0.74 | 5.0E-01 | KDEL1                  | 8.57  | 0.60 | 5.7E-01 |
| PLXNB2      | 9.41  | 0.74 | 5.6E-01 | TMED7                  | 10.17 | 0.60 | 5.7E-01 |
| TMCO1       | 9.11  | 0.74 | 5.0E-01 | RRAS                   | 10.22 | 0.60 | 5.7E-01 |
| PABPN1      | 9.32  | 0.74 | 5.6E-01 | KBTBD11                | 8.75  | 0.60 | 5.7E-01 |
| U2AF2       | 9.98  | 0.74 | 5.0E-01 | PRKACB                 | 9.99  | 0.60 | 6.0E-01 |
| CXADR       | 9.18  | 0.74 | 5.0E-01 | STX8                   | 9.07  | 0.60 | 6.2E-01 |
| ADCY6       | 8.25  | 0.74 | 4.6E-01 | PIIF                   | 10.26 | 0.59 | 5.8E-01 |
| IVD         | 10.81 | 0.73 | 4.5E-01 | METAP2                 | 9.08  | 0.59 | 6.2E-01 |
| ABHD12      | 9.22  | 0.73 | 5.6E-01 | DDOST                  | 10.55 | 0.59 | 5.8E-01 |
| RAB4A       | 9.45  | 0.73 | 5.6E-01 | SEL1L                  | 9.27  | 0.59 | 6.7E-01 |
| ELMOD2      | 9.50  | 0.73 | 5.6E-01 | LMAN2L                 | 9.76  | 0.59 | 7.3E-01 |
| KIF1A       | 8.67  | 0.73 | 4.6E-01 | RPA1                   | 10.48 | 0.59 | 5.8E-01 |
| DAD1        | 10.06 | 0.73 | 5.0E-01 | MTUS2                  | 9.01  | 0.59 | 6.3E-01 |
| SEC11A      | 9.78  | 0.73 | 6.3E-01 | RPA3                   | 9.68  | 0.59 | 7.4E-01 |
| DSP         | 10.65 | 0.73 | 4.5E-01 | EMC3                   | 8.96  | 0.59 | 6.3E-01 |
| KIAA1967    | 10.02 | 0.73 | 5.1E-01 | CCDC58                 | 10.19 | 0.58 | 5.8E-01 |
| WDR82       | 9.18  | 0.73 | 5.1E-01 | SRRT                   | 9.74  | 0.58 | 7.4E-01 |
| ECHDC3      | 9.70  | 0.72 | 6.3E-01 | ITPRIP                 | 9.09  | 0.58 | 6.3E-01 |
| ETHE1       | 9.95  | 0.72 | 5.1E-01 | OXSM                   | 9.08  | 0.58 | 6.3E-01 |
| KDSR        | 9.11  | 0.72 | 5.1E-01 | PDLIM3                 | 11.00 | 0.58 | 5.7E-01 |
| GLUD1       | 10.94 | 0.72 | 4.5E-01 | POR                    | 9.47  | 0.58 | 6.8E-01 |
| PTPN1       | 8.65  | 0.72 | 4.7E-01 | RAB35                  | 9.65  | 0.58 | 7.4E-01 |
| GGH         | 9.59  | 0.72 | 6.4E-01 | RAD50                  | 9.53  | 0.58 | 7.4E-01 |
| PURA        | 10.25 | 0.72 | 4.7E-01 | NCSTN                  | 9.40  | 0.58 | 6.8E-01 |
| APP         | 8.74  | 0.72 | 4.7E-01 | PDS5B                  | 9.12  | 0.58 | 6.3E-01 |
| EHD4        | 10.90 | 0.72 | 4.6E-01 | FAHD2A;FAHD2B          | 10.55 | 0.58 | 5.9E-01 |
| LYRM2       | 8.88  | 0.71 | 5.2E-01 | ALYREF                 | 9.36  | 0.58 | 6.8E-01 |
| ERLEC1      | 8.78  | 0.71 | 4.8E-01 | NAGA                   | 9.65  | 0.57 | 7.5E-01 |
| PTBP2       | 9.60  | 0.71 | 6.4E-01 | PTN                    | 9.27  | 0.57 | 6.8E-01 |
| FH          | 11.59 | 0.71 | 4.6E-01 | POLR2J;POLR2J3;POLR2J2 | 8.69  | 0.58 | 6.0E-01 |
| ATP6V0A1    | 8.58  | 0.71 | 4.8E-01 |                        |       |      |         |
| TRMT61A     | 8.72  | 0.71 | 4.8E-01 | SART3                  | 9.95  | 0.57 | 6.2E-01 |
| ADD3        | 9.87  | 0.71 | 5.2E-01 | TARDBP                 | 10.14 | 0.57 | 6.2E-01 |
| DPM1        | 9.69  | 0.71 | 6.5E-01 | RAB3D;RAB3A            | 8.26  | 0.57 | 6.0E-01 |
| LAMTOR5     | 9.27  | 0.71 | 5.8E-01 | TOLLIP                 | 10.13 | 0.57 | 6.2E-01 |

|                    |       |      |         |                 |       |      |         |
|--------------------|-------|------|---------|-----------------|-------|------|---------|
| CRIP1              | 9.75  | 0.57 | 7.5E-01 | ACSF3           | 9.01  | 0.52 | 6.8E-01 |
| ACAA1              | 9.73  | 0.57 | 7.5E-01 | SPCS3           | 9.48  | 0.52 | 7.2E-01 |
| TMED2              | 10.17 | 0.57 | 6.0E-01 | TMED10          | 10.54 | 0.52 | 6.4E-01 |
| SRR                | 9.69  | 0.57 | 7.5E-01 | FUBP3           | 8.99  | 0.52 | 6.9E-01 |
| OSTC               | 9.35  | 0.57 | 6.9E-01 | KRAS            | 9.79  | 0.52 | 7.9E-01 |
| MYH1               | 11.32 | 0.56 | 5.8E-01 | PRPF31          | 9.08  | 0.52 | 6.9E-01 |
| DDX46              | 9.69  | 0.56 | 7.5E-01 | SAT2            | 9.54  | 0.52 | 7.9E-01 |
| UBXN6              | 8.86  | 0.56 | 6.0E-01 | RAB18           | 10.19 | 0.52 | 6.4E-01 |
| MSRA               | 9.21  | 0.56 | 6.9E-01 | SLC25A13        | 9.68  | 0.52 | 7.9E-01 |
| PDK3               | 9.60  | 0.56 | 7.5E-01 | TRMT10C         | 9.75  | 0.51 | 7.9E-01 |
| NUDT2              | 9.86  | 0.56 | 6.2E-01 | DHX9            | 10.37 | 0.51 | 6.5E-01 |
| PPT1               | 9.98  | 0.56 | 6.3E-01 | LRPAP1          | 9.89  | 0.51 | 6.6E-01 |
| SLC12A4            | 8.32  | 0.56 | 6.0E-01 | CTNNB1          | 9.20  | 0.51 | 7.3E-01 |
| CPSF6              | 9.67  | 0.56 | 7.6E-01 | FLJ00186;RASSF5 | 8.37  | 0.51 | 6.5E-01 |
| IMPAD1             | 9.57  | 0.56 | 7.6E-01 | PPP1CC          | 9.38  | 0.51 | 7.3E-01 |
| GSTM1              | 9.98  | 0.56 | 6.3E-01 | ACTL6A          | 8.93  | 0.51 | 6.9E-01 |
| SYVN1              | 8.66  | 0.56 | 6.1E-01 | DAZAP1          | 9.55  | 0.51 | 8.0E-01 |
| ATE1               | 9.64  | 0.56 | 7.6E-01 | PROS1           | 10.33 | 0.51 | 6.5E-01 |
| FAM171A1           | 8.12  | 0.56 | 6.1E-01 | TBL2            | 9.26  | 0.51 | 7.3E-01 |
| CTSB               | 10.98 | 0.56 | 5.9E-01 | BOLA1           | 8.33  | 0.51 | 6.5E-01 |
| ACADM              | 10.83 | 0.55 | 5.9E-01 | KDM3B           | 8.73  | 0.51 | 6.5E-01 |
| GNAI2              | 10.78 | 0.55 | 5.9E-01 | DEK             | 10.04 | 0.51 | 6.7E-01 |
| SPTAN1             | 11.52 | 0.55 | 5.9E-01 | CYB5R1          | 10.57 | 0.51 | 6.5E-01 |
| GLRX               | 9.69  | 0.55 | 7.6E-01 | LAP3            | 9.94  | 0.50 | 6.7E-01 |
| PIGU               | 8.23  | 0.55 | 6.1E-01 | RAB7A           | 10.66 | 0.50 | 6.3E-01 |
| ROR2               | 9.11  | 0.55 | 6.6E-01 | C17orf62        | 8.49  | 0.50 | 6.5E-01 |
| POLG               | 9.39  | 0.55 | 7.0E-01 | RAP1A           | 10.53 | 0.50 | 6.6E-01 |
| SMC3               | 9.36  | 0.55 | 7.0E-01 | C21orf33        | 11.07 | 0.50 | 6.3E-01 |
| ELAC2              | 9.12  | 0.55 | 6.6E-01 | HNRNPUL1        | 10.00 | 0.50 | 6.7E-01 |
| PNKP               | 8.79  | 0.55 | 6.2E-01 | PGAM2           | 11.01 | 0.50 | 6.4E-01 |
| SELH;C11orf31      | 9.46  | 0.55 | 7.0E-01 | USE1            | 8.34  | 0.50 | 6.6E-01 |
| GOLGA2             | 8.84  | 0.54 | 6.2E-01 | TPP1            | 10.48 | 0.50 | 6.6E-01 |
| ARL8A              | 10.27 | 0.54 | 6.2E-01 | WRNIP1          | 8.73  | 0.50 | 6.6E-01 |
| CNPY3              | 9.54  | 0.54 | 7.7E-01 | NMNAT3          | 8.32  | 0.50 | 6.6E-01 |
| COG3               | 8.69  | 0.54 | 6.2E-01 | PPP1R21         | 9.09  | 0.49 | 7.1E-01 |
| GNAI3              | 8.57  | 0.54 | 6.2E-01 | SLC20A2         | 8.59  | 0.49 | 6.7E-01 |
| MCM6               | 9.93  | 0.54 | 6.4E-01 | VTI1B           | 9.55  | 0.49 | 8.1E-01 |
| PRKDC              | 11.13 | 0.54 | 6.0E-01 | EPS15L1         | 9.37  | 0.49 | 7.5E-01 |
| DNAJB2             | 8.73  | 0.54 | 6.2E-01 | ALDH18A1        | 9.90  | 0.49 | 6.8E-01 |
| MTDH               | 9.59  | 0.54 | 7.7E-01 | NELFCD;TH1L     | 9.00  | 0.49 | 7.1E-01 |
| GSTM2              | 10.71 | 0.54 | 6.0E-01 | RANBP3          | 9.80  | 0.49 | 8.1E-01 |
| CMBL               | 9.85  | 0.54 | 6.4E-01 | TOM1            | 10.01 | 0.49 | 6.8E-01 |
| ANK2               | 10.39 | 0.54 | 6.2E-01 | HNRNPM          | 10.91 | 0.49 | 6.5E-01 |
| BAD                | 8.43  | 0.54 | 6.2E-01 | CPT2            | 10.49 | 0.49 | 6.7E-01 |
| SACM1L             | 9.64  | 0.54 | 7.7E-01 | NPM1            | 10.73 | 0.49 | 6.5E-01 |
| CBR1               | 10.32 | 0.54 | 6.3E-01 | VKORC1L1        | 9.02  | 0.49 | 7.2E-01 |
| TGM2               | 11.78 | 0.54 | 6.0E-01 | HMOX2           | 9.87  | 0.49 | 6.8E-01 |
| MCM4               | 9.74  | 0.54 | 7.7E-01 | ILVBL           | 10.21 | 0.48 | 6.7E-01 |
| SNCA               | 9.70  | 0.54 | 7.7E-01 | VAMP7           | 8.41  | 0.48 | 6.7E-01 |
| WFS1               | 8.50  | 0.53 | 6.3E-01 | TIMM44          | 10.29 | 0.48 | 6.7E-01 |
| HSPB8              | 9.90  | 0.53 | 6.5E-01 | MCM7            | 9.93  | 0.48 | 6.9E-01 |
| YPEL5              | 8.64  | 0.53 | 6.3E-01 | CNP             | 10.18 | 0.48 | 6.7E-01 |
| XRN2               | 9.21  | 0.53 | 7.1E-01 | NTPCR           | 9.84  | 0.48 | 6.9E-01 |
| MAP1LC3B;MAP1LC3B2 | 9.51  | 0.53 | 7.1E-01 | TRIM55          | 10.08 | 0.48 | 6.9E-01 |
| SIRPA;SIRPB1       | 9.25  | 0.53 | 7.1E-01 | EPM2AIP1        | 10.02 | 0.48 | 6.9E-01 |
| SCFD2              | 8.73  | 0.53 | 6.3E-01 | RBM39           | 9.37  | 0.48 | 7.6E-01 |
| SCARB2             | 10.45 | 0.53 | 6.3E-01 | DUT             | 9.91  | 0.48 | 6.9E-01 |
| EWSR1              | 9.78  | 0.53 | 7.8E-01 | BPHL            | 9.41  | 0.48 | 7.6E-01 |
| LARP7              | 8.93  | 0.53 | 6.8E-01 | SMEK1           | 8.91  | 0.48 | 7.2E-01 |
| PRCP               | 10.08 | 0.53 | 6.5E-01 | MLTK            | 10.14 | 0.47 | 6.9E-01 |
| LIN7C              | 9.53  | 0.53 | 7.8E-01 | TARS2           | 9.87  | 0.47 | 6.9E-01 |
| TMED9              | 10.18 | 0.53 | 6.3E-01 | ANKMY2          | 8.96  | 0.47 | 7.3E-01 |
| MCM3               | 9.92  | 0.53 | 6.5E-01 | IER3IP1         | 9.66  | 0.47 | 8.2E-01 |
| STT3B              | 9.31  | 0.53 | 7.2E-01 | TXLNB           | 9.80  | 0.47 | 8.2E-01 |
| GNAI1              | 9.32  | 0.53 | 7.2E-01 | CADM1           | 9.45  | 0.47 | 7.6E-01 |
| ATP6V1F            | 9.07  | 0.52 | 6.8E-01 | NBAS            | 8.84  | 0.47 | 6.8E-01 |
| GRSF1              | 8.99  | 0.52 | 6.8E-01 | HLA-A           | 9.62  | 0.47 | 8.3E-01 |
| DCXR               | 10.47 | 0.52 | 6.4E-01 | NUPL1           | 8.72  | 0.47 | 6.9E-01 |
| PPP1R12B           | 9.47  | 0.52 | 7.2E-01 | SRPR            | 9.74  | 0.47 | 8.3E-01 |
| PVRL2              | 9.10  | 0.52 | 6.8E-01 | NSF             | 9.71  | 0.47 | 8.3E-01 |
| RAB13              | 9.49  | 0.52 | 7.2E-01 | STRN3           | 9.16  | 0.47 | 7.3E-01 |
| PTPMT1             | 8.95  | 0.52 | 6.8E-01 | HSPA13          | 8.54  | 0.47 | 6.9E-01 |



|                      |       |      |         |                      |       |      |         |
|----------------------|-------|------|---------|----------------------|-------|------|---------|
| NUDT14               | 9.39  | 0.47 | 7.7E-01 | AKAP8L               | 8.35  | 0.41 | 7.4E-01 |
| ACTN2                | 9.72  | 0.46 | 8.3E-01 | DAG1                 | 10.13 | 0.41 | 7.4E-01 |
| JMJD7                | 9.60  | 0.46 | 8.3E-01 | RNF20                | 8.87  | 0.41 | 7.9E-01 |
| TMEM199              | 8.77  | 0.46 | 6.9E-01 | ALDH9A1              | 10.88 | 0.41 | 7.2E-01 |
| NPC2                 | 10.03 | 0.46 | 7.0E-01 | NRP1                 | 9.28  | 0.41 | 8.1E-01 |
| HDHD2                | 10.00 | 0.46 | 7.0E-01 | ATM                  | 8.65  | 0.41 | 7.5E-01 |
| VWA8                 | 9.53  | 0.46 | 8.3E-01 | RTN4                 | 11.36 | 0.41 | 7.2E-01 |
| MPDU1;HBEBP2BPA      | 9.20  | 0.46 | 7.4E-01 | CISD3                | 8.88  | 0.41 | 7.9E-01 |
| PITRM1               | 10.10 | 0.46 | 7.1E-01 | IARS2                | 10.94 | 0.41 | 7.2E-01 |
| GOSR2                | 9.32  | 0.46 | 7.8E-01 | RPL36AL              | 9.54  | 0.40 | 8.8E-01 |
| TMX3                 | 9.99  | 0.45 | 7.1E-01 | PDDC1                | 9.59  | 0.40 | 8.8E-01 |
| STXBP1               | 9.11  | 0.45 | 7.4E-01 | API5                 | 9.93  | 0.40 | 7.5E-01 |
| RAB11A               | 9.33  | 0.45 | 7.8E-01 | DDX39B               | 10.40 | 0.40 | 7.5E-01 |
| RARS2                | 8.42  | 0.45 | 7.0E-01 | LMAN2                | 10.06 | 0.40 | 7.5E-01 |
| BRI3BP               | 9.49  | 0.45 | 7.8E-01 | LGMN                 | 9.69  | 0.40 | 8.8E-01 |
| SDF2                 | 9.27  | 0.45 | 7.8E-01 | RRAS2                | 9.12  | 0.40 | 7.9E-01 |
| LNPEP                | 9.70  | 0.45 | 8.4E-01 | FER                  | 9.14  | 0.40 | 7.9E-01 |
| SSR1                 | 9.50  | 0.45 | 7.8E-01 | ALDH3A2              | 10.58 | 0.40 | 7.5E-01 |
| GTF2I                | 9.66  | 0.45 | 8.4E-01 | SRP9                 | 10.22 | 0.40 | 7.5E-01 |
| HEXA                 | 9.76  | 0.45 | 8.4E-01 | FSTL1                | 9.57  | 0.40 | 8.8E-01 |
| EPHX1                | 9.74  | 0.45 | 8.4E-01 | NMNAT1               | 9.02  | 0.40 | 8.0E-01 |
| ATP6V1B2             | 9.98  | 0.45 | 7.1E-01 | SDHAF2               | 8.83  | 0.40 | 7.5E-01 |
| LRRC20               | 9.08  | 0.45 | 7.5E-01 | HDGFRP3              | 9.15  | 0.40 | 8.0E-01 |
| MVB12A               | 9.13  | 0.45 | 7.5E-01 | DDAH1                | 10.50 | 0.40 | 7.5E-01 |
| VPS37A               | 9.11  | 0.45 | 7.5E-01 | ATP6VID              | 9.74  | 0.40 | 8.8E-01 |
| MCM2                 | 9.89  | 0.45 | 7.1E-01 | PPP1R2;PPP1R2P3      | 9.24  | 0.40 | 8.2E-01 |
| SMC1A                | 9.99  | 0.44 | 7.2E-01 | SSR3                 | 9.21  | 0.39 | 8.3E-01 |
| KTN1                 | 10.74 | 0.44 | 6.9E-01 | SMAD2                | 9.35  | 0.39 | 8.3E-01 |
| HNMT                 | 9.06  | 0.44 | 7.5E-01 | MANBA                | 9.18  | 0.39 | 8.0E-01 |
| BCAP29               | 9.48  | 0.44 | 7.9E-01 | APMAP                | 10.18 | 0.39 | 7.6E-01 |
| DPAGT1               | 8.33  | 0.44 | 7.1E-01 | GBA                  | 9.75  | 0.39 | 8.9E-01 |
| RAP2C                | 8.99  | 0.44 | 7.6E-01 | SMPD1                | 8.91  | 0.39 | 8.0E-01 |
| ASPH                 | 10.28 | 0.44 | 7.1E-01 | PALM                 | 8.69  | 0.39 | 7.6E-01 |
| MTMR9                | 8.81  | 0.44 | 7.1E-01 | TCEAL3;TCEAL6;TCEAL5 | 8.92  | 0.39 | 8.0E-01 |
| TOMM34               | 8.99  | 0.44 | 7.6E-01 | PHPT1                | 10.66 | 0.39 | 7.4E-01 |
| TECR                 | 9.43  | 0.44 | 7.9E-01 | CSNK2A1;CSNK2A3      | 9.93  | 0.39 | 7.6E-01 |
| SNRNP200             | 9.90  | 0.44 | 7.2E-01 | CSNK1A1              | 9.68  | 0.39 | 8.9E-01 |
| DLG1                 | 9.92  | 0.44 | 7.2E-01 | TBC1D24              | 9.20  | 0.39 | 8.3E-01 |
| GPR89A;GPR89B;GPR89C | 7.97  | 0.44 | 7.1E-01 | ACP2                 | 9.38  | 0.39 | 8.3E-01 |
|                      |       |      |         | ITGB1                | 10.65 | 0.39 | 7.4E-01 |
| SEC63                | 9.12  | 0.44 | 7.6E-01 | GFM1                 | 10.08 | 0.39 | 7.6E-01 |
| PKM                  | 11.13 | 0.44 | 6.9E-01 | VAMP5                | 8.64  | 0.39 | 7.6E-01 |
| COPS7A               | 9.98  | 0.44 | 7.2E-01 | IRF2BP2              | 8.90  | 0.38 | 8.1E-01 |
| KDEL2                | 9.26  | 0.44 | 7.9E-01 | RAB11B               | 10.99 | 0.38 | 7.4E-01 |
| PFKM                 | 11.50 | 0.44 | 6.9E-01 | MSI2                 | 8.78  | 0.38 | 7.7E-01 |
| HSDL2                | 10.61 | 0.44 | 7.2E-01 | SSR4                 | 10.19 | 0.38 | 7.7E-01 |
| CD99                 | 10.15 | 0.44 | 7.2E-01 | PUF60                | 9.97  | 0.38 | 7.7E-01 |
| UACA                 | 9.50  | 0.44 | 7.9E-01 | ATP1A1               | 11.31 | 0.38 | 7.4E-01 |
| MYOM1                | 10.58 | 0.43 | 7.2E-01 | GLG1                 | 9.49  | 0.38 | 8.4E-01 |
| RAB1B                | 10.16 | 0.43 | 7.2E-01 | CTBP2                | 8.85  | 0.38 | 7.7E-01 |
| HLA-B                | 9.04  | 0.43 | 7.6E-01 | SMIM1                | 8.62  | 0.38 | 7.7E-01 |
| GFM2                 | 9.49  | 0.43 | 8.0E-01 | NELFB                | 9.05  | 0.38 | 8.1E-01 |
| CECR5                | 10.39 | 0.43 | 7.2E-01 | PRKACA;KIN27         | 11.06 | 0.38 | 7.5E-01 |
| SRSF2                | 10.27 | 0.43 | 7.3E-01 | REEP5                | 10.72 | 0.38 | 7.5E-01 |
| DDX17                | 10.24 | 0.43 | 7.3E-01 | HNRNPF               | 9.99  | 0.38 | 7.7E-01 |
| C12orf23             | 9.57  | 0.43 | 8.6E-01 | NUCB2;Nucb2          | 9.78  | 0.38 | 9.0E-01 |
| RAB1A                | 10.96 | 0.42 | 7.1E-01 | UAP1L1               | 9.46  | 0.38 | 8.4E-01 |
| ECI1;DCI             | 11.15 | 0.42 | 7.1E-01 | STARD9               | 9.76  | 0.38 | 9.0E-01 |
| TF                   | 10.45 | 0.42 | 7.3E-01 | CARS2                | 9.83  | 0.38 | 7.7E-01 |
| TBCEL                | 8.73  | 0.42 | 7.3E-01 | TRIM32               | 8.46  | 0.38 | 7.7E-01 |
| ARFIP1               | 8.89  | 0.42 | 7.8E-01 | C9orf142             | 9.14  | 0.37 | 8.2E-01 |
| RNF5                 | 9.01  | 0.42 | 7.8E-01 | HOMER1               | 8.66  | 0.37 | 7.8E-01 |
| RBBP7                | 9.25  | 0.42 | 8.1E-01 | BLOC1S1              | 8.82  | 0.37 | 7.8E-01 |
| FKBP2                | 10.21 | 0.42 | 7.3E-01 | TMEM43               | 9.54  | 0.37 | 9.0E-01 |
| PNPT1                | 9.71  | 0.42 | 8.7E-01 | PCYOX1               | 10.63 | 0.37 | 7.8E-01 |
| PSMB6                | 10.57 | 0.41 | 7.4E-01 | AP2S1                | 9.87  | 0.37 | 7.7E-01 |
| VPS13A               | 9.55  | 0.41 | 8.7E-01 | EXOSC2               | 8.61  | 0.37 | 7.8E-01 |
| LMAN1                | 10.00 | 0.41 | 7.4E-01 | OVCA2                | 8.80  | 0.37 | 7.8E-01 |
| BCAM                 | 10.39 | 0.41 | 7.4E-01 | POFUT1               | 9.73  | 0.37 | 9.0E-01 |
| PLBD2                | 9.09  | 0.41 | 7.9E-01 | HNRNPK               | 11.18 | 0.37 | 7.5E-01 |
| HNRNPLL;HNRPLL       | 9.75  | 0.41 | 8.7E-01 | HNRNPD               | 9.24  | 0.37 | 8.5E-01 |
| MYH8                 | 9.17  | 0.41 | 7.9E-01 | PPCS                 | 10.09 | 0.37 | 7.8E-01 |

|                                                      |       |      |         |               |       |      |         |
|------------------------------------------------------|-------|------|---------|---------------|-------|------|---------|
| RPRD1B                                               | 9.23  | 0.37 | 8.5E-01 | COPS6         | 10.31 | 0.32 | 8.2E-01 |
| LYPLAL1                                              | 10.30 | 0.37 | 7.8E-01 | DYRK1A;DYRK1B | 8.87  | 0.32 | 8.7E-01 |
| IDH1                                                 | 10.95 | 0.37 | 7.6E-01 | MAPK8IP3      | 8.80  | 0.32 | 8.2E-01 |
| TMEM192                                              | 8.86  | 0.37 | 7.8E-01 | SEC61A1       | 9.63  | 0.32 | 9.4E-01 |
| SDC3                                                 | 8.04  | 0.36 | 7.9E-01 | SPTBN1        | 11.37 | 0.32 | 8.0E-01 |
| AP2M1                                                | 10.25 | 0.36 | 7.8E-01 | NIF3L1        | 9.98  | 0.32 | 8.2E-01 |
| MRAS                                                 | 9.14  | 0.36 | 8.3E-01 | CFDP1         | 8.31  | 0.32 | 8.3E-01 |
| NELFA                                                | 8.43  | 0.36 | 7.9E-01 | TTC7B         | 8.90  | 0.32 | 8.7E-01 |
| FUCA2                                                | 9.14  | 0.36 | 8.3E-01 | PDK1          | 10.97 | 0.32 | 8.0E-01 |
| SAR1B;DKFZp434B2017                                  | 9.89  | 0.36 | 7.8E-01 | DTYMK         | 10.14 | 0.32 | 8.2E-01 |
| RAB5B                                                | 10.52 | 0.36 | 7.9E-01 | HNRNPAB       | 9.40  | 0.32 | 8.9E-01 |
| TNFAIP8                                              | 9.42  | 0.36 | 8.5E-01 | WDR37         | 9.53  | 0.32 | 9.5E-01 |
| EIF4EBP2                                             | 8.34  | 0.36 | 7.9E-01 | PDIA3         | 10.22 | 0.32 | 8.3E-01 |
| STK3                                                 | 9.08  | 0.36 | 8.3E-01 | LSM7          | 9.22  | 0.32 | 8.9E-01 |
| PDIA5                                                | 9.13  | 0.36 | 8.3E-01 | AKR7A2        | 10.53 | 0.32 | 8.3E-01 |
| TBC1D1                                               | 8.53  | 0.36 | 7.9E-01 | RPS29         | 9.94  | 0.32 | 8.2E-01 |
| ATP2B1                                               | 8.83  | 0.36 | 7.9E-01 | HNRNPD        | 10.79 | 0.31 | 8.1E-01 |
| PURB                                                 | 10.03 | 0.36 | 7.9E-01 | MANF          | 10.32 | 0.31 | 8.3E-01 |
| SMAP1                                                | 9.13  | 0.36 | 8.3E-01 | CD151         | 9.83  | 0.31 | 8.2E-01 |
| PACSIN2                                              | 10.14 | 0.36 | 7.9E-01 | DDX42         | 9.01  | 0.31 | 8.8E-01 |
| CD59                                                 | 10.15 | 0.35 | 7.9E-01 | MOCS2         | 9.01  | 0.31 | 8.8E-01 |
| RBM24;RBM38                                          | 9.81  | 0.35 | 9.2E-01 | LONP1         | 10.58 | 0.31 | 8.3E-01 |
| MIPEP                                                | 9.17  | 0.35 | 8.4E-01 | CAPRIN1       | 9.56  | 0.31 | 9.5E-01 |
| GTF2F2                                               | 9.35  | 0.35 | 8.6E-01 | SLC27A1       | 9.01  | 0.31 | 8.8E-01 |
| HEBP2                                                | 10.06 | 0.35 | 7.9E-01 | HSPA2         | 9.39  | 0.31 | 9.0E-01 |
| NLN                                                  | 9.16  | 0.35 | 8.4E-01 | RPLP1         | 10.42 | 0.31 | 8.3E-01 |
| GSR                                                  | 10.94 | 0.35 | 7.8E-01 | CBS           | 8.97  | 0.31 | 8.8E-01 |
| CSNK2B;CSNK2B-<br>LY6G5B-1181;CSNK2B-<br>LY6G5B--991 | 9.71  | 0.35 | 9.2E-01 | CTSZ          | 9.67  | 0.31 | 9.5E-01 |
|                                                      |       |      |         | SRPK2         | 9.30  | 0.31 | 9.0E-01 |
|                                                      |       |      |         | NASP          | 10.73 | 0.31 | 8.1E-01 |
| CDC42                                                | 8.34  | 0.35 | 8.0E-01 | ERAP1         | 9.53  | 0.31 | 9.5E-01 |
| CTBP1                                                | 9.95  | 0.35 | 7.9E-01 | USP7          | 9.67  | 0.31 | 9.5E-01 |
| USP10                                                | 9.10  | 0.35 | 8.4E-01 | TPP2          | 10.46 | 0.31 | 8.4E-01 |
| RDH11                                                | 10.04 | 0.35 | 8.0E-01 | LSM5          | 9.30  | 0.31 | 9.0E-01 |
| ITGA7                                                | 8.78  | 0.35 | 8.0E-01 | TRAP1         | 10.38 | 0.31 | 8.4E-01 |
| AKAP9                                                | 8.63  | 0.34 | 8.1E-01 | PSMD14        | 10.27 | 0.31 | 8.4E-01 |
| LMF2                                                 | 8.72  | 0.34 | 8.1E-01 | JPH2          | 9.98  | 0.31 | 8.3E-01 |
| ATP6V1E1                                             | 9.93  | 0.34 | 8.0E-01 | KHSRP         | 10.42 | 0.30 | 8.4E-01 |
| CCDC134                                              | 8.77  | 0.34 | 8.1E-01 | PSMC2         | 10.73 | 0.30 | 8.2E-01 |
| PMPCA                                                | 9.87  | 0.34 | 8.0E-01 | PSMC6         | 10.52 | 0.30 | 8.4E-01 |
| UBL4A                                                | 9.72  | 0.34 | 9.3E-01 | TMEM167A      | 9.54  | 0.30 | 9.6E-01 |
| PSMC3                                                | 10.56 | 0.34 | 8.1E-01 | PSMD4         | 10.22 | 0.30 | 8.5E-01 |
| DTNA                                                 | 8.85  | 0.34 | 8.1E-01 | CLYBL         | 9.67  | 0.30 | 9.6E-01 |
| NAA38                                                | 9.67  | 0.34 | 9.3E-01 | RNF7          | 9.04  | 0.30 | 8.9E-01 |
| STARD10                                              | 8.93  | 0.34 | 8.5E-01 | SLC16A3       | 9.30  | 0.30 | 9.1E-01 |
| ALG2                                                 | 9.35  | 0.34 | 8.7E-01 | VPS37B        | 9.27  | 0.30 | 9.1E-01 |
| RAB14                                                | 10.25 | 0.34 | 8.1E-01 | TTN           | 12.67 | 0.30 | 8.2E-01 |
| PSAP                                                 | 10.55 | 0.34 | 8.1E-01 | PMPCB         | 9.88  | 0.30 | 8.4E-01 |
| STAT5B;STAT5A                                        | 9.23  | 0.34 | 8.7E-01 | PREP          | 10.80 | 0.30 | 8.3E-01 |
| SVIL                                                 | 8.69  | 0.34 | 8.1E-01 | GNS           | 9.39  | 0.30 | 9.1E-01 |
| ASNA1                                                | 10.18 | 0.34 | 8.1E-01 | CORO6         | 9.32  | 0.30 | 9.1E-01 |
| NT5C                                                 | 9.78  | 0.34 | 9.3E-01 | PEBP1         | 11.27 | 0.29 | 8.3E-01 |
| YIF1A                                                | 9.07  | 0.34 | 8.5E-01 | COPG2         | 9.68  | 0.29 | 9.7E-01 |
| CBX3                                                 | 9.40  | 0.34 | 8.7E-01 | WBP11         | 8.36  | 0.29 | 8.5E-01 |
| ITGB6                                                | 9.81  | 0.34 | 9.3E-01 | RFC4          | 8.58  | 0.29 | 8.6E-01 |
| TBC1D4                                               | 9.93  | 0.34 | 8.0E-01 | XRCC5         | 10.98 | 0.29 | 8.3E-01 |
| SRPRB                                                | 9.84  | 0.34 | 8.0E-01 | BDH2          | 10.40 | 0.29 | 8.5E-01 |
| PSMD3                                                | 10.77 | 0.33 | 7.9E-01 | GPS1          | 10.29 | 0.29 | 8.5E-01 |
| TMEM41A                                              | 8.93  | 0.33 | 8.6E-01 | TCERG1        | 9.70  | 0.29 | 9.7E-01 |
| CKM                                                  | 11.46 | 0.33 | 7.9E-01 | SH3BGRL       | 10.55 | 0.29 | 8.6E-01 |
| ECH1                                                 | 11.09 | 0.33 | 7.9E-01 | CDK5          | 9.26  | 0.29 | 9.1E-01 |
| LRRC59                                               | 10.59 | 0.33 | 8.1E-01 | GORASP2       | 9.43  | 0.29 | 9.1E-01 |
| ATP6V1H                                              | 9.31  | 0.33 | 8.8E-01 | PSMD11        | 10.73 | 0.29 | 8.3E-01 |
| UGP2                                                 | 11.79 | 0.33 | 7.9E-01 | NEDD4         | 8.57  | 0.29 | 8.6E-01 |
| STT3A                                                | 9.69  | 0.33 | 9.4E-01 | RBM20         | 8.39  | 0.29 | 8.6E-01 |
| NHP2L1                                               | 9.55  | 0.33 | 9.4E-01 | NCBP2         | 8.83  | 0.29 | 8.6E-01 |
| PPP1CB                                               | 10.88 | 0.33 | 8.0E-01 | DDX1          | 10.57 | 0.29 | 8.6E-01 |
| NCL                                                  | 11.11 | 0.33 | 8.0E-01 | RPL30         | 10.87 | 0.29 | 8.4E-01 |
| RTN3                                                 | 10.26 | 0.33 | 8.2E-01 | HSPA1A        | 11.77 | 0.28 | 8.4E-01 |
| TBC1D17                                              | 9.14  | 0.33 | 8.6E-01 | PSMC5         | 10.64 | 0.28 | 8.4E-01 |
| GIGYF2                                               | 8.81  | 0.33 | 8.2E-01 | PCID2         | 8.88  | 0.28 | 9.1E-01 |
| SHMT2                                                | 10.67 | 0.33 | 8.0E-01 | PSMB5         | 10.98 | 0.28 | 8.4E-01 |

|                    |       |      |         |             |       |      |         |
|--------------------|-------|------|---------|-------------|-------|------|---------|
| RRM1               | 9.56  | 0.28 | 9.8E-01 | BCAP31      | 10.46 | 0.24 | 9.0E-01 |
| CNOT7              | 9.18  | 0.28 | 9.1E-01 | SEPT15      | 9.52  | 0.24 | 9.9E-01 |
| PSMC4              | 10.53 | 0.28 | 8.7E-01 | AAMDC       | 10.44 | 0.24 | 9.0E-01 |
| COPS5              | 10.39 | 0.28 | 8.7E-01 | POLR2E      | 8.82  | 0.24 | 9.0E-01 |
| TRIP12             | 8.02  | 0.28 | 8.7E-01 | DDX6        | 10.11 | 0.24 | 8.8E-01 |
| UCHL5              | 9.63  | 0.28 | 9.8E-01 | SF1         | 9.75  | 0.24 | 9.9E-01 |
| CCT6B              | 9.61  | 0.28 | 9.8E-01 | ADRM1       | 10.00 | 0.24 | 8.8E-01 |
| RPL4               | 11.04 | 0.28 | 8.4E-01 | EHD3        | 10.58 | 0.24 | 9.0E-01 |
| HECTD3             | 8.49  | 0.28 | 8.7E-01 | EIF3L       | 10.50 | 0.24 | 9.0E-01 |
| PRDX4              | 10.80 | 0.28 | 8.5E-01 | BZW2        | 10.65 | 0.24 | 8.8E-01 |
| CALR               | 11.65 | 0.28 | 8.5E-01 | C14orf166   | 10.44 | 0.24 | 9.1E-01 |
| PRDX6              | 11.66 | 0.28 | 8.5E-01 | CD276       | 8.57  | 0.24 | 9.1E-01 |
| COG4               | 9.06  | 0.28 | 9.1E-01 | MIEN1       | 9.30  | 0.24 | 9.6E-01 |
| XRCC6              | 11.17 | 0.28 | 8.5E-01 | BPNT1       | 10.40 | 0.24 | 9.1E-01 |
| LAMB2              | 10.15 | 0.28 | 8.6E-01 | BUB3        | 10.06 | 0.24 | 8.9E-01 |
| RANGAP1            | 9.09  | 0.27 | 9.1E-01 | HSPA4L      | 9.25  | 0.24 | 9.6E-01 |
| PTRHD1             | 9.95  | 0.27 | 8.6E-01 | CUL5        | 9.91  | 0.24 | 8.9E-01 |
| NAPA               | 10.23 | 0.27 | 8.7E-01 | RRAGC;RRAGD | 9.44  | 0.24 | 9.6E-01 |
| NKIRAS2            | 8.66  | 0.27 | 8.7E-01 | CLINT1      | 9.30  | 0.23 | 9.6E-01 |
| PSMC1              | 10.61 | 0.27 | 8.7E-01 | MYH2        | 9.68  | 0.23 | 9.8E-01 |
| UBE4A              | 9.45  | 0.27 | 9.3E-01 | RAB6A       | 10.76 | 0.23 | 8.9E-01 |
| RPS28              | 10.33 | 0.27 | 8.7E-01 | PPP1R1B     | 8.62  | 0.23 | 9.2E-01 |
| FNBP1L             | 8.48  | 0.27 | 8.8E-01 | TACC2       | 9.48  | 0.23 | 9.6E-01 |
| NIT1               | 10.28 | 0.27 | 8.7E-01 | TFRC        | 10.67 | 0.23 | 8.9E-01 |
| PRKRA              | 9.90  | 0.27 | 8.6E-01 | HMGB3       | 9.68  | 0.23 | 9.7E-01 |
| EDC3               | 8.73  | 0.27 | 8.8E-01 | ITGA3       | 9.23  | 0.23 | 9.6E-01 |
| DNAJB11            | 9.77  | 0.27 | 9.8E-01 | THAP4       | 9.73  | 0.23 | 9.7E-01 |
| GPC1               | 9.66  | 0.27 | 9.9E-01 | COPS2       | 10.38 | 0.23 | 9.2E-01 |
| MZT2B;MZT2A        | 8.48  | 0.27 | 8.8E-01 | RHOG        | 9.96  | 0.23 | 8.9E-01 |
| EEF1E1;hCG_2043275 | 10.23 | 0.26 | 8.8E-01 | NCDN        | 9.30  | 0.23 | 9.7E-01 |
| PSMB7              | 10.54 | 0.26 | 8.8E-01 | RNMT        | 9.45  | 0.23 | 9.7E-01 |
| SNAPIN             | 9.05  | 0.26 | 9.2E-01 | SSH3        | 8.87  | 0.23 | 9.6E-01 |
| KPNA3              | 9.98  | 0.26 | 8.7E-01 | TOR1A       | 8.66  | 0.23 | 9.2E-01 |
| C22orf28           | 10.55 | 0.26 | 8.8E-01 | ATP6V1A     | 10.29 | 0.23 | 9.2E-01 |
| RPL37A             | 10.41 | 0.26 | 8.8E-01 | PABPC4      | 10.29 | 0.22 | 9.2E-01 |
| LSM6               | 10.03 | 0.26 | 8.7E-01 | TUBA1C      | 9.47  | 0.22 | 9.7E-01 |
| DHX30              | 9.26  | 0.26 | 9.4E-01 | ARL3        | 10.28 | 0.22 | 9.2E-01 |
| PSMD12             | 10.53 | 0.26 | 8.8E-01 | COPS8       | 10.03 | 0.22 | 9.0E-01 |
| ZNF207             | 9.61  | 0.26 | 9.9E-01 | ITCH;WWP1   | 8.24  | 0.22 | 9.3E-01 |
| POLR21             | 8.29  | 0.26 | 8.9E-01 | RABEP2      | 9.07  | 0.22 | 9.6E-01 |
| PI4K2A             | 8.57  | 0.26 | 8.9E-01 | ALDH16A1    | 9.29  | 0.22 | 9.7E-01 |
| ARHGAP1            | 10.72 | 0.26 | 8.6E-01 | MDH1        | 12.08 | 0.22 | 9.0E-01 |
| STRN4              | 8.97  | 0.26 | 9.3E-01 | EFHD2       | 9.07  | 0.22 | 9.6E-01 |
| RPLP2              | 9.98  | 0.26 | 8.7E-01 | DNMT1       | 9.22  | 0.22 | 9.7E-01 |
| PTGR2              | 9.89  | 0.26 | 8.7E-01 | PCYT1A      | 9.49  | 0.22 | 9.7E-01 |
| PSMD8              | 10.46 | 0.26 | 8.9E-01 | EXOSC4      | 8.72  | 0.22 | 9.3E-01 |
| GPX7               | 9.74  | 0.26 | 1.0E+00 | RPL29       | 10.17 | 0.22 | 9.0E-01 |
| DNAJC8             | 9.37  | 0.26 | 9.4E-01 | SGPL1       | 9.48  | 0.22 | 9.7E-01 |
| FUK                | 8.76  | 0.25 | 8.9E-01 | HSPA5       | 11.88 | 0.22 | 9.0E-01 |
| TP53I11            | 9.20  | 0.25 | 9.4E-01 | RTN2        | 9.88  | 0.22 | 9.0E-01 |
| SMARCA1;SMARCA5    | 8.34  | 0.25 | 8.9E-01 | MYO18A      | 10.14 | 0.22 | 9.1E-01 |
| GUK1               | 9.92  | 0.25 | 8.7E-01 | SLC4A4      | 8.01  | 0.22 | 9.3E-01 |
| SRRM1              | 8.88  | 0.25 | 9.3E-01 | PRRC2C      | 8.81  | 0.22 | 9.3E-01 |
| MSH2               | 9.67  | 0.25 | 1.0E+00 | RPL31       | 10.72 | 0.21 | 9.1E-01 |
| LMOD1              | 9.47  | 0.25 | 9.5E-01 | SPEG        | 8.97  | 0.21 | 9.7E-01 |
| IDE                | 9.67  | 0.25 | 1.0E+00 | CNN3        | 10.51 | 0.21 | 9.3E-01 |
| TFCP2              | 8.86  | 0.25 | 9.4E-01 | PTK7        | 9.90  | 0.21 | 9.1E-01 |
| CPOX               | 10.19 | 0.25 | 8.9E-01 | SUPT5H      | 8.93  | 0.21 | 9.7E-01 |
| RPL35A             | 10.84 | 0.25 | 8.7E-01 | CLASP2      | 9.20  | 0.21 | 9.8E-01 |
| CUTA               | 10.19 | 0.25 | 8.9E-01 | EP300       | 8.91  | 0.21 | 9.7E-01 |
| KIF2A              | 8.84  | 0.25 | 9.0E-01 | ALAD        | 10.14 | 0.21 | 9.1E-01 |
| MTPN               | 10.40 | 0.25 | 9.0E-01 | GABARAPL2   | 9.80  | 0.21 | 9.5E-01 |
| SH3BGRL2           | 9.30  | 0.25 | 9.5E-01 | PIP4K2B     | 9.28  | 0.21 | 9.8E-01 |
| UROD               | 9.54  | 0.25 | 1.0E+00 | TUBG1;TUBG2 | 9.73  | 0.21 | 9.4E-01 |
| TAB1               | 9.34  | 0.25 | 9.5E-01 | TNPO2       | 9.46  | 0.21 | 9.8E-01 |
| PSMD13             | 10.68 | 0.25 | 8.7E-01 | SARNP       | 10.02 | 0.21 | 9.1E-01 |
| VPS45              | 9.22  | 0.25 | 9.5E-01 | GOLGB1      | 9.93  | 0.21 | 9.1E-01 |
| PSMD2              | 10.90 | 0.25 | 8.8E-01 | INPP4B      | 9.81  | 0.21 | 9.4E-01 |
| IFT27              | 9.41  | 0.24 | 9.5E-01 | ABLIM1      | 9.13  | 0.21 | 9.8E-01 |
| AIMP2              | 10.03 | 0.24 | 8.8E-01 | RPL8        | 10.87 | 0.21 | 9.1E-01 |
| ZW10               | 8.76  | 0.24 | 9.0E-01 | AGPAT1      | 8.74  | 0.21 | 9.4E-01 |
| XRCC1              | 8.55  | 0.24 | 9.0E-01 | PSMG3       | 8.95  | 0.21 | 9.8E-01 |

|                           |       |      |         |                      |       |      |         |
|---------------------------|-------|------|---------|----------------------|-------|------|---------|
| DSTN                      | 11.01 | 0.20 | 9.1E-01 | PSMD7                | 10.42 | 0.18 | 9.6E-01 |
| USP47                     | 9.68  | 0.20 | 9.4E-01 | SNX5                 | 9.39  | 0.18 | 9.9E-01 |
| MGME1                     | 8.25  | 0.20 | 9.4E-01 | RPL6                 | 11.00 | 0.18 | 9.4E-01 |
| PAPOLA                    | 8.75  | 0.20 | 9.4E-01 | PRKAR2A              | 10.85 | 0.18 | 9.4E-01 |
| SCFD1                     | 10.18 | 0.20 | 9.4E-01 | RPL7                 | 11.11 | 0.18 | 9.4E-01 |
| APEX1                     | 10.68 | 0.20 | 9.2E-01 | DCTN4                | 9.83  | 0.18 | 9.4E-01 |
| TUBB2A                    | 9.60  | 0.20 | 9.4E-01 | UBQLN4               | 8.81  | 0.17 | 9.7E-01 |
| FUBP1                     | 10.41 | 0.20 | 9.4E-01 | LSM4                 | 9.88  | 0.17 | 9.4E-01 |
| RPLP0;RPLP0P6             | 11.08 | 0.20 | 9.2E-01 | PSMA3                | 10.96 | 0.17 | 9.4E-01 |
| FLAD1                     | 8.81  | 0.20 | 9.5E-01 | PANK4                | 10.34 | 0.17 | 9.7E-01 |
| ITSN1                     | 9.33  | 0.20 | 9.9E-01 | GLOD4                | 10.61 | 0.17 | 9.7E-01 |
| GAS6                      | 8.55  | 0.20 | 9.5E-01 | EIF1B                | 9.26  | 0.17 | 9.8E-01 |
| ARPC1A                    | 10.44 | 0.20 | 9.4E-01 | DNAJC3               | 9.12  | 0.17 | 9.9E-01 |
| POFUT2                    | 9.31  | 0.20 | 9.9E-01 | COG2                 | 8.93  | 0.17 | 9.9E-01 |
| PSMB1                     | 10.94 | 0.20 | 9.2E-01 | GDI1                 | 10.62 | 0.17 | 9.7E-01 |
| RPS21                     | 10.38 | 0.20 | 9.4E-01 | DHX38                | 8.44  | 0.17 | 9.8E-01 |
| PDXK                      | 10.29 | 0.20 | 9.4E-01 | RPL7A                | 11.02 | 0.17 | 9.5E-01 |
| LSM3                      | 9.47  | 0.20 | 9.9E-01 | DNAJA2               | 10.41 | 0.17 | 9.7E-01 |
| ESD                       | 10.88 | 0.20 | 9.2E-01 | CTNND1               | 10.20 | 0.17 | 9.7E-01 |
| AP2A1                     | 10.35 | 0.20 | 9.4E-01 | C19orf53             | 8.76  | 0.17 | 9.8E-01 |
| CUL7                      | 8.51  | 0.20 | 9.5E-01 | RAP1B                | 9.18  | 0.17 | 9.8E-01 |
| RPL32                     | 10.60 | 0.20 | 9.5E-01 | FXR1                 | 9.66  | 0.17 | 8.9E-01 |
| LPCAT1                    | 8.27  | 0.20 | 9.5E-01 | FYCO1                | 9.70  | 0.17 | 8.9E-01 |
| PSMA1                     | 11.04 | 0.20 | 9.2E-01 | RAB8A                | 9.62  | 0.17 | 8.9E-01 |
| PDIA3                     | 11.63 | 0.20 | 9.2E-01 | RPL10A               | 10.86 | 0.17 | 9.5E-01 |
| SULT1A1;SULT1A2           | 9.59  | 0.19 | 9.3E-01 | KIAA0907             | 8.36  | 0.17 | 9.8E-01 |
| CAMK2B                    | 9.86  | 0.19 | 9.2E-01 | PSMD1                | 10.67 | 0.17 | 9.5E-01 |
| NAA30                     | 8.58  | 0.19 | 9.5E-01 | NUDT16               | 9.38  | 0.17 | 9.7E-01 |
| LAMA2                     | 9.57  | 0.19 | 9.2E-01 | PPA1                 | 10.15 | 0.17 | 9.5E-01 |
| MOGS                      | 9.87  | 0.19 | 9.2E-01 | RER1                 | 8.82  | 0.17 | 9.8E-01 |
| RPL5                      | 10.83 | 0.19 | 9.3E-01 | EIF3E                | 10.28 | 0.17 | 9.8E-01 |
| LTA4H                     | 10.66 | 0.19 | 9.3E-01 | MAP3K7;DKFZp586F0420 | 8.90  | 0.17 | 9.8E-01 |
| PSMB4                     | 10.71 | 0.19 | 9.3E-01 | NUP54                | 8.92  | 0.16 | 9.8E-01 |
| PSMA6                     | 11.01 | 0.19 | 9.3E-01 | NPC1                 | 8.56  | 0.16 | 9.8E-01 |
| COG8                      | 8.84  | 0.19 | 9.6E-01 | RPL36A               | 10.24 | 0.16 | 9.8E-01 |
| TPRKB                     | 8.76  | 0.19 | 9.6E-01 | PRKAB1               | 9.28  | 0.16 | 9.7E-01 |
| PSMD6                     | 10.57 | 0.19 | 9.5E-01 | NAP1L4               | 10.74 | 0.16 | 9.5E-01 |
| ADI1                      | 9.74  | 0.19 | 9.2E-01 | SELK                 | 8.35  | 0.16 | 9.8E-01 |
| ATXN2L                    | 9.19  | 0.19 | 9.9E-01 | BSG                  | 10.80 | 0.16 | 9.6E-01 |
| GOLPH3                    | 9.14  | 0.19 | 1.0E+00 | DNM2                 | 10.59 | 0.16 | 9.8E-01 |
| HMGA1;C2orf81             | 8.56  | 0.19 | 9.6E-01 | RPL34                | 10.63 | 0.16 | 9.8E-01 |
| CGGBP1                    | 9.34  | 0.19 | 1.0E+00 | GET4                 | 9.30  | 0.16 | 9.7E-01 |
| C6orf211                  | 10.07 | 0.19 | 9.3E-01 | PSMA5                | 10.89 | 0.16 | 9.6E-01 |
| ARSA                      | 9.35  | 0.19 | 1.0E+00 | EIF3I                | 10.32 | 0.16 | 9.8E-01 |
| PSMA4                     | 10.82 | 0.19 | 9.3E-01 | CRYZ                 | 10.75 | 0.16 | 9.6E-01 |
| Nbla03646;DHCR24          | 8.84  | 0.19 | 9.6E-01 | HMGCL                | 9.60  | 0.16 | 8.8E-01 |
| RPS12                     | 10.82 | 0.19 | 9.3E-01 | RPL12                | 10.92 | 0.16 | 9.6E-01 |
| ACBD3                     | 9.75  | 0.19 | 9.1E-01 | OSGEP                | 9.15  | 0.16 | 9.7E-01 |
| GCHFR                     | 8.90  | 0.19 | 1.0E+00 | EFNB3                | 9.27  | 0.16 | 9.7E-01 |
| ACOX2                     | 8.57  | 0.19 | 9.6E-01 | COPS4                | 10.47 | 0.16 | 9.8E-01 |
| AARSD1;PTGES3L-<br>AARSD1 | 9.39  | 0.19 | 1.0E+00 | GIPC1                | 8.88  | 0.16 | 9.7E-01 |
| POLR2L                    | 8.55  | 0.18 | 9.6E-01 | RPL21                | 10.59 | 0.16 | 9.9E-01 |
| PCMT1                     | 10.51 | 0.18 | 9.6E-01 | RPL13                | 10.95 | 0.16 | 9.6E-01 |
| HLA-C                     | 8.92  | 0.18 | 1.0E+00 | GPX1                 | 10.24 | 0.16 | 9.9E-01 |
| SND1                      | 10.54 | 0.18 | 9.6E-01 | PSMB3                | 10.70 | 0.16 | 9.6E-01 |
| PFN2                      | 9.55  | 0.18 | 9.1E-01 | SURF4                | 9.80  | 0.16 | 8.7E-01 |
| PRDX2                     | 11.82 | 0.18 | 9.4E-01 | RPL14                | 10.65 | 0.16 | 9.6E-01 |
| EIF3F                     | 10.06 | 0.18 | 9.3E-01 | GALK1                | 9.94  | 0.16 | 9.6E-01 |
| CASK                      | 8.86  | 0.18 | 1.0E+00 | OXSRI                | 10.06 | 0.15 | 9.6E-01 |
| TMOD1                     | 10.17 | 0.18 | 9.6E-01 | NUDT9                | 9.16  | 0.15 | 9.6E-01 |
| SEPT5                     | 10.54 | 0.18 | 9.6E-01 | RPL28                | 10.72 | 0.15 | 9.7E-01 |
| UBE2O                     | 9.64  | 0.18 | 9.1E-01 | ITGAV                | 10.17 | 0.15 | 9.9E-01 |
| NPEPPS                    | 11.22 | 0.18 | 9.4E-01 | FDPS                 | 10.60 | 0.15 | 9.9E-01 |
| CNPY2                     | 10.04 | 0.18 | 9.3E-01 | RUVBL1               | 10.49 | 0.15 | 9.9E-01 |
| AP2B1                     | 10.59 | 0.18 | 9.6E-01 | SOD2                 | 11.21 | 0.15 | 9.7E-01 |
| PLSCR1                    | 8.40  | 0.18 | 9.7E-01 | RPL27A               | 10.51 | 0.15 | 9.9E-01 |
| PSMB2                     | 10.75 | 0.18 | 9.4E-01 | DYNLL2               | 10.50 | 0.15 | 9.9E-01 |
| ERP44                     | 10.18 | 0.18 | 9.6E-01 | MSH3                 | 7.97  | 0.15 | 1.0E+00 |
| MAN2B1                    | 9.85  | 0.18 | 9.4E-01 | SRP14                | 10.55 | 0.15 | 9.9E-01 |
| PSMA2                     | 10.83 | 0.18 | 9.4E-01 | MAP1B                | 10.79 | 0.15 | 9.7E-01 |
| RPL18A                    | 10.61 | 0.18 | 9.6E-01 | COG7                 | 8.91  | 0.15 | 9.6E-01 |
|                           |       |      |         | RPL18                | 10.93 | 0.15 | 9.7E-01 |

|                   |       |      |         |                   |       |      |         |
|-------------------|-------|------|---------|-------------------|-------|------|---------|
| AASS              | 10.11 | 0.15 | 9.6E-01 | TMEM47            | 8.96  | 0.12 | 9.3E-01 |
| PLEC              | 11.31 | 0.15 | 9.7E-01 | SYNE2             | 9.54  | 0.12 | 8.3E-01 |
| MGEA5             | 9.66  | 0.15 | 8.6E-01 | RPL27             | 10.84 | 0.12 | 1.0E+00 |
| HLA-B             | 8.75  | 0.15 | 1.0E+00 | NIT2              | 10.36 | 0.12 | 9.7E-01 |
| CNPY4             | 9.59  | 0.15 | 8.6E-01 | RPL24             | 10.65 | 0.12 | 1.0E+00 |
| RBX1              | 9.74  | 0.15 | 8.6E-01 | EIF3H;EIF3S3      | 10.24 | 0.12 | 9.7E-01 |
| SAMHD1            | 8.94  | 0.15 | 9.6E-01 | RPL26;KRBA2       | 10.66 | 0.12 | 1.0E+00 |
| SNTA1             | 10.08 | 0.15 | 9.6E-01 | NUP133            | 8.46  | 0.12 | 9.7E-01 |
| DYNC1L12          | 9.77  | 0.15 | 8.6E-01 | RPSA;RPSAP58      | 10.99 | 0.12 | 1.0E+00 |
| FBLN2             | 8.49  | 0.15 | 1.0E+00 | STAM2             | 8.43  | 0.12 | 9.7E-01 |
| MYH7              | 13.17 | 0.15 | 9.7E-01 | XRN1              | 8.11  | 0.12 | 9.7E-01 |
| MEF2D             | 9.24  | 0.15 | 9.5E-01 | AMPD2             | 9.31  | 0.12 | 9.1E-01 |
| GNB2L1            | 11.14 | 0.14 | 9.7E-01 | HSPA6;HSPA7       | 11.06 | 0.12 | 1.0E+00 |
| SNAP23            | 9.11  | 0.14 | 9.5E-01 | KARS              | 10.34 | 0.12 | 9.6E-01 |
| SERBP1            | 10.61 | 0.14 | 1.0E+00 | BRE               | 9.47  | 0.12 | 9.1E-01 |
| MYCBP             | 9.49  | 0.14 | 9.4E-01 | CCBL1             | 9.20  | 0.11 | 9.1E-01 |
| COPS3             | 10.25 | 0.14 | 1.0E+00 | RPS20             | 10.87 | 0.11 | 9.9E-01 |
| PPFIA4            | 8.77  | 0.14 | 9.9E-01 | KPNA4             | 9.69  | 0.11 | 8.2E-01 |
| GALM              | 9.82  | 0.14 | 9.7E-01 | UCHL3             | 9.98  | 0.11 | 9.9E-01 |
| SNX4              | 8.63  | 0.14 | 9.9E-01 | RPL15             | 10.73 | 0.11 | 9.9E-01 |
| RPS17L;RPS17      | 10.75 | 0.14 | 9.8E-01 | TRAPPC2P1;TRAPPC2 | 8.61  | 0.11 | 9.6E-01 |
| ERP29             | 10.48 | 0.14 | 1.0E+00 | KDELRL1;KDELRL2   | 9.35  | 0.11 | 9.1E-01 |
| AK4               | 10.95 | 0.14 | 9.8E-01 | DYNLL1            | 9.64  | 0.11 | 8.2E-01 |
| LACTB2            | 9.32  | 0.14 | 9.4E-01 | UBE2G2            | 8.38  | 0.11 | 9.6E-01 |
| GOT1              | 11.78 | 0.14 | 9.8E-01 | GNAQ              | 9.70  | 0.11 | 8.1E-01 |
| GOPC              | 8.30  | 0.14 | 9.9E-01 | RPS25             | 10.74 | 0.11 | 9.8E-01 |
| RPL35             | 10.68 | 0.14 | 9.8E-01 | TRAPPC6B          | 9.51  | 0.11 | 9.0E-01 |
| HRC               | 10.67 | 0.14 | 9.8E-01 | AIMP1             | 10.25 | 0.11 | 9.5E-01 |
| SELM              | 8.46  | 0.14 | 9.9E-01 | CORO1C            | 9.64  | 0.11 | 8.1E-01 |
| BPGM              | 9.02  | 0.14 | 9.5E-01 | NACA              | 11.17 | 0.11 | 9.8E-01 |
| THUMPD1           | 9.55  | 0.14 | 8.5E-01 | DYNLT1            | 10.32 | 0.11 | 9.5E-01 |
| SLC39A7           | 9.40  | 0.14 | 9.4E-01 | RAB3IP            | 8.45  | 0.11 | 9.5E-01 |
| STUB1             | 9.08  | 0.14 | 9.5E-01 | EIF4A3            | 9.53  | 0.11 | 8.1E-01 |
| APIG1             | 9.80  | 0.14 | 8.5E-01 | MARCKSL1          | 9.59  | 0.11 | 8.1E-01 |
| FARSA             | 10.33 | 0.14 | 9.9E-01 | AP1B1             | 9.78  | 0.10 | 8.1E-01 |
| S4R3N1            | 9.96  | 0.14 | 9.7E-01 | EIF3K             | 10.19 | 0.10 | 9.4E-01 |
| ATIC              | 10.69 | 0.14 | 9.8E-01 | RPS15             | 10.16 | 0.10 | 1.0E+00 |
| FARSB             | 10.50 | 0.14 | 9.9E-01 | GRB2              | 11.25 | 0.10 | 9.8E-01 |
| PPP2R5E           | 8.98  | 0.14 | 9.4E-01 | RPS3              | 11.16 | 0.10 | 9.8E-01 |
| CHKB              | 9.07  | 0.14 | 9.4E-01 | MARS              | 10.31 | 0.10 | 9.4E-01 |
| ADSS              | 8.68  | 0.13 | 9.8E-01 | OSBP              | 9.73  | 0.10 | 8.1E-01 |
| PRMT1             | 10.14 | 0.13 | 9.8E-01 | CLIC5             | 9.83  | 0.10 | 1.0E+00 |
| TXNDC12           | 9.92  | 0.13 | 9.8E-01 | RBPM52            | 9.68  | 0.10 | 8.0E-01 |
| FUT11             | 8.64  | 0.13 | 9.8E-01 | RPL19             | 10.58 | 0.10 | 9.4E-01 |
| ROR1              | 8.61  | 0.13 | 9.8E-01 | CSNK2A2           | 9.32  | 0.10 | 8.9E-01 |
| RDX               | 10.63 | 0.13 | 9.9E-01 | TUBGCP2           | 9.48  | 0.10 | 8.9E-01 |
| EIF3D             | 10.20 | 0.13 | 9.8E-01 | RPS19             | 10.98 | 0.10 | 9.7E-01 |
| ARF1;ARF3         | 11.11 | 0.13 | 9.9E-01 | AGA               | 9.06  | 0.10 | 9.0E-01 |
| RPL9              | 10.66 | 0.13 | 9.9E-01 | OGT               | 8.89  | 0.10 | 9.0E-01 |
| RUVBL2            | 10.52 | 0.13 | 9.8E-01 | APOA1BP           | 10.45 | 0.10 | 9.3E-01 |
| MIA3              | 9.78  | 0.13 | 8.4E-01 | ATL2              | 9.36  | 0.10 | 8.9E-01 |
| RAB5A             | 9.97  | 0.13 | 9.8E-01 | TPM1              | 10.19 | 0.10 | 9.3E-01 |
| GSTO1             | 10.74 | 0.13 | 9.9E-01 | GSTM3             | 10.94 | 0.10 | 9.6E-01 |
| ANXA7             | 10.45 | 0.13 | 9.8E-01 | TRAPPC3           | 9.68  | 0.09 | 8.0E-01 |
| RPL22             | 10.56 | 0.13 | 9.8E-01 | RPS3A             | 11.28 | 0.09 | 9.6E-01 |
| TSG101            | 10.16 | 0.13 | 9.8E-01 | ARMC8             | 8.76  | 0.09 | 9.4E-01 |
| CDC42BPB          | 9.38  | 0.13 | 9.2E-01 | RPS24             | 10.29 | 0.09 | 9.3E-01 |
| SIK2              | 9.50  | 0.13 | 9.2E-01 | HDGF              | 10.43 | 0.09 | 9.3E-01 |
| PRPF38B           | 8.44  | 0.13 | 9.8E-01 | LUC7L3            | 8.93  | 0.09 | 8.9E-01 |
| SAR1A             | 10.57 | 0.13 | 9.8E-01 | YBX1              | 10.64 | 0.09 | 9.6E-01 |
| RAB21             | 10.53 | 0.13 | 9.7E-01 | LDB3              | 10.60 | 0.09 | 9.3E-01 |
| ACY1;ABHD14A-ACY1 | 9.17  | 0.13 | 9.3E-01 | RPL3              | 10.89 | 0.09 | 9.6E-01 |
| PSMA7             | 10.99 | 0.13 | 9.8E-01 | PTGR1             | 10.38 | 0.09 | 9.2E-01 |
| ARFGAP2           | 9.53  | 0.13 | 8.5E-01 | QDPR              | 10.55 | 0.09 | 9.2E-01 |
| FAM98B            | 9.71  | 0.13 | 8.5E-01 | COG1              | 8.81  | 0.09 | 9.3E-01 |
| ARL1              | 9.89  | 0.13 | 9.7E-01 | AP2A2             | 9.98  | 0.09 | 9.8E-01 |
| RPL11             | 10.74 | 0.13 | 9.9E-01 | RPS18             | 10.99 | 0.09 | 9.5E-01 |
| SEPW1             | 10.19 | 0.12 | 9.7E-01 | CEP97             | 9.30  | 0.09 | 8.8E-01 |
| NRAS              | 9.26  | 0.12 | 9.2E-01 | KRT18             | 11.24 | 0.09 | 9.5E-01 |
| PKP2              | 10.18 | 0.12 | 9.7E-01 | MYADM             | 9.53  | 0.09 | 7.9E-01 |
| FAT1              | 8.45  | 0.12 | 9.7E-01 | PI4KA             | 9.32  | 0.09 | 8.7E-01 |
| RPL36             | 10.41 | 0.12 | 9.7E-01 | LDB3              | 11.58 | 0.09 | 9.5E-01 |

|               |       |      |         |                   |       |      |         |
|---------------|-------|------|---------|-------------------|-------|------|---------|
| FAM213B       | 9.06  | 0.08 | 8.8E-01 | KLHL41            | 10.04 | 0.05 | 9.3E-01 |
| TMED3         | 8.92  | 0.08 | 8.8E-01 | HDHD1             | 9.46  | 0.05 | 8.3E-01 |
| GLO1          | 10.90 | 0.08 | 9.4E-01 | CALM1;CALM2       | 10.50 | 0.05 | 8.7E-01 |
| MAVS          | 9.77  | 0.08 | 7.8E-01 | SHROOM1           | 8.54  | 0.05 | 8.9E-01 |
| TRAPPC1       | 9.26  | 0.08 | 8.7E-01 | WDR1              | 11.23 | 0.05 | 8.9E-01 |
| DTD1          | 9.19  | 0.08 | 8.8E-01 | SAMD4B            | 8.45  | 0.05 | 8.9E-01 |
| RPS16         | 11.00 | 0.08 | 9.4E-01 | VPS11             | 9.72  | 0.05 | 7.4E-01 |
| DCAF11        | 8.51  | 0.08 | 9.2E-01 | LRSAM1            | 8.99  | 0.05 | 8.4E-01 |
| HSPB11        | 9.44  | 0.08 | 8.7E-01 | PCBP2             | 10.88 | 0.05 | 8.9E-01 |
| DERA          | 9.54  | 0.08 | 7.8E-01 | TRNT1             | 9.24  | 0.05 | 8.3E-01 |
| CRIP2         | 11.32 | 0.08 | 9.4E-01 | YTHDF3            | 9.60  | 0.05 | 7.4E-01 |
| GPX8          | 9.43  | 0.08 | 8.7E-01 | GOLGA3            | 8.91  | 0.05 | 8.4E-01 |
| PPP2R1A       | 11.20 | 0.08 | 9.4E-01 | SPAG7             | 9.44  | 0.05 | 8.3E-01 |
| RPS5          | 10.88 | 0.08 | 9.4E-01 | CALU              | 10.89 | 0.05 | 8.8E-01 |
| LCMT1         | 9.34  | 0.08 | 8.7E-01 | MAN2C1            | 10.64 | 0.05 | 8.8E-01 |
| DHX16         | 8.18  | 0.08 | 9.2E-01 | ANK3              | 10.23 | 0.05 | 8.6E-01 |
| TUBGCP3       | 9.11  | 0.08 | 8.8E-01 | PLCD1             | 9.95  | 0.04 | 9.1E-01 |
| BRCC3         | 9.45  | 0.08 | 8.6E-01 | SET               | 10.59 | 0.04 | 8.5E-01 |
| ATG9A         | 7.97  | 0.08 | 9.2E-01 | BUD31             | 8.79  | 0.04 | 8.8E-01 |
| QARS          | 10.52 | 0.08 | 9.0E-01 | PPP2R2A           | 9.97  | 0.04 | 9.1E-01 |
| EIF4A2        | 11.00 | 0.08 | 9.3E-01 | EIF4B             | 9.87  | 0.04 | 9.1E-01 |
| GNPAT         | 8.83  | 0.08 | 9.2E-01 | FN3KRP            | 9.77  | 0.04 | 7.3E-01 |
| GRPEL1        | 10.10 | 0.08 | 9.6E-01 | RAB34             | 8.87  | 0.04 | 8.3E-01 |
| HYOU1         | 10.85 | 0.08 | 9.3E-01 | ACAD10            | 8.82  | 0.04 | 8.8E-01 |
| ABCA8         | 8.23  | 0.07 | 9.1E-01 | ATP1B1            | 10.52 | 0.04 | 8.5E-01 |
| RPL13A;RPL13a | 10.73 | 0.07 | 9.2E-01 | RPL23A            | 10.77 | 0.04 | 8.7E-01 |
| RPS4X         | 11.05 | 0.07 | 9.2E-01 | RBM12             | 9.56  | 0.04 | 7.3E-01 |
| DHX29         | 8.89  | 0.07 | 8.7E-01 | EIF3J             | 9.81  | 0.04 | 7.2E-01 |
| RPS14         | 10.75 | 0.07 | 9.2E-01 | POGLUT1           | 8.86  | 0.04 | 8.3E-01 |
| SH3GL1        | 9.85  | 0.07 | 9.5E-01 | MGLL              | 8.98  | 0.04 | 8.3E-01 |
| CNOT10        | 8.74  | 0.07 | 9.1E-01 | SEC24B            | 9.38  | 0.04 | 8.1E-01 |
| EEF1A2        | 11.28 | 0.07 | 9.2E-01 | IGFBP5            | 8.40  | 0.04 | 8.7E-01 |
| RPL17         | 10.72 | 0.07 | 9.2E-01 | FAU               | 9.93  | 0.04 | 9.0E-01 |
| LSM2          | 10.02 | 0.07 | 9.5E-01 | RPL10             | 10.64 | 0.04 | 8.7E-01 |
| USP14         | 10.61 | 0.07 | 8.9E-01 | HSPBP1            | 9.33  | 0.04 | 8.1E-01 |
| TNPO1         | 10.09 | 0.07 | 9.5E-01 | SACS              | 8.77  | 0.04 | 8.7E-01 |
| DNM1L         | 10.62 | 0.07 | 8.9E-01 | RPS6              | 10.75 | 0.04 | 8.6E-01 |
| PPP1R12A      | 10.22 | 0.07 | 8.9E-01 | AGPS              | 9.74  | 0.04 | 7.2E-01 |
| HARS          | 10.08 | 0.07 | 9.5E-01 | GMPPB             | 10.07 | 0.03 | 9.0E-01 |
| RPS15A        | 10.82 | 0.07 | 9.2E-01 | NULP1;TCF25       | 8.66  | 0.03 | 8.7E-01 |
| PPP1R14C      | 9.27  | 0.07 | 8.5E-01 | SLC1A4            | 8.53  | 0.03 | 8.7E-01 |
| HAGH          | 10.33 | 0.07 | 8.9E-01 | CC2D1A            | 8.91  | 0.03 | 8.2E-01 |
| PGP           | 10.08 | 0.07 | 9.4E-01 | ARPC5L            | 9.94  | 0.03 | 8.9E-01 |
| NEBL          | 10.97 | 0.07 | 9.1E-01 | VPS28             | 10.07 | 0.03 | 8.9E-01 |
| TRMT112       | 9.80  | 0.07 | 7.6E-01 | SPTLC2            | 8.75  | 0.03 | 8.6E-01 |
| RPS2          | 11.02 | 0.07 | 9.2E-01 | ACSL4             | 9.07  | 0.03 | 8.2E-01 |
| GNPDA1        | 10.35 | 0.07 | 8.9E-01 | ZCCHC3            | 8.53  | 0.03 | 8.6E-01 |
| RPS13         | 10.86 | 0.06 | 9.1E-01 | TBCB              | 10.10 | 0.03 | 8.9E-01 |
| PPIL3         | 9.73  | 0.06 | 7.6E-01 | RPS27A            | 11.50 | 0.03 | 8.6E-01 |
| TP53RK        | 9.37  | 0.06 | 8.5E-01 | ARL2              | 9.72  | 0.03 | 7.1E-01 |
| PHKG2         | 9.02  | 0.06 | 8.6E-01 | RPS26;RPS26P11    | 10.57 | 0.03 | 8.3E-01 |
| DHX15         | 10.15 | 0.06 | 9.4E-01 | SIPA1L2           | 8.72  | 0.03 | 8.6E-01 |
| HIST1H4A      | 10.70 | 0.06 | 9.1E-01 | TPM1              | 10.25 | 0.03 | 8.3E-01 |
| PPIL1         | 10.24 | 0.06 | 8.8E-01 | CHMP2B            | 8.94  | 0.03 | 8.2E-01 |
| CAPG          | 9.13  | 0.06 | 8.5E-01 | SYNGR2            | 9.81  | 0.03 | 7.1E-01 |
| AGO2          | 9.49  | 0.06 | 8.4E-01 | PPIL4             | 8.68  | 0.03 | 8.6E-01 |
| EIF3G         | 9.86  | 0.06 | 9.3E-01 | RHOA;RHOC         | 10.77 | 0.03 | 8.5E-01 |
| DERL1         | 9.08  | 0.06 | 8.5E-01 | PPP1R12C          | 8.94  | 0.03 | 8.1E-01 |
| CLTCL1        | 9.08  | 0.06 | 8.5E-01 | IMPA1             | 10.61 | 0.03 | 8.3E-01 |
| CAT           | 10.30 | 0.06 | 8.8E-01 | RPS10             | 10.74 | 0.03 | 8.5E-01 |
| ARFGEF2       | 9.39  | 0.06 | 8.4E-01 | ATG16L1           | 8.82  | 0.03 | 8.6E-01 |
| RPS8          | 10.96 | 0.06 | 9.0E-01 | ESYT2             | 9.21  | 0.03 | 8.0E-01 |
| C19orf43      | 8.79  | 0.06 | 9.0E-01 | RPS23             | 10.50 | 0.03 | 8.2E-01 |
| FERMT2        | 9.52  | 0.06 | 7.5E-01 | PDIA4             | 11.14 | 0.02 | 8.5E-01 |
| MPI           | 10.09 | 0.06 | 9.3E-01 | VPS16             | 9.21  | 0.02 | 8.0E-01 |
| ARL15         | 8.99  | 0.06 | 8.5E-01 | SHOC2             | 8.64  | 0.02 | 8.6E-01 |
| POLR2H        | 9.28  | 0.06 | 8.4E-01 | PPP2CA            | 10.70 | 0.02 | 8.5E-01 |
| MAPK9;MAPK10  | 8.85  | 0.06 | 8.9E-01 | HEATR2            | 8.76  | 0.02 | 8.5E-01 |
| ABR           | 9.45  | 0.06 | 8.4E-01 | BICD2             | 9.18  | 0.02 | 8.1E-01 |
| TUBB2B        | 10.88 | 0.06 | 9.0E-01 | DNM2              | 8.68  | 0.02 | 8.5E-01 |
| CUL1          | 9.71  | 0.06 | 7.4E-01 | COG5              | 9.16  | 0.02 | 8.1E-01 |
| SNAP29        | 9.33  | 0.06 | 8.3E-01 | H3F3B;H3F3A;H3F3C | 10.23 | 0.02 | 8.2E-01 |

|               |       |      |         |             |       |      |         |
|---------------|-------|------|---------|-------------|-------|------|---------|
| RPL39P5;RPL39 | 9.72  | 0.02 | 7.0E-01 | MPST        | 10.31 | 0.01 | 8.1E-01 |
| UBE2V2        | 9.62  | 0.02 | 7.0E-01 | CUTC        | 8.81  | 0.01 | 8.4E-01 |
| DR1           | 8.58  | 0.02 | 8.5E-01 | CEP170      | 8.81  | 0.01 | 8.4E-01 |
| NEMF          | 8.96  | 0.02 | 8.1E-01 | EEFSEC      | 9.70  | 0.01 | 6.9E-01 |
| YWHAQ         | 11.27 | 0.02 | 8.4E-01 | USP28       | 9.55  | 0.01 | 6.9E-01 |
| PDIA6         | 11.21 | 0.02 | 8.4E-01 | EIF3M       | 10.14 | 0.01 | 8.6E-01 |
| WNK1          | 9.94  | 0.02 | 8.7E-01 | GOLGA4      | 9.12  | 0.01 | 8.0E-01 |
| NAE1          | 10.54 | 0.02 | 8.1E-01 | DCTN6       | 9.49  | 0.01 | 7.8E-01 |
| TXNDC17       | 10.30 | 0.02 | 8.1E-01 | C7orf55     | 9.86  | 0.01 | 8.6E-01 |
| VPS25         | 9.93  | 0.02 | 8.7E-01 | ERI3        | 9.26  | 0.01 | 7.8E-01 |
| CUL4A         | 9.72  | 0.02 | 7.0E-01 | SKP1        | 10.13 | 0.01 | 8.6E-01 |
| ACTR10        | 9.48  | 0.02 | 7.9E-01 | FAM96A      | 8.67  | 0.01 | 8.4E-01 |
| PSME3         | 9.44  | 0.02 | 7.9E-01 | HINT1       | 10.98 | 0.01 | 8.2E-01 |
| RALGAPB       | 8.72  | 0.02 | 8.5E-01 | USP13       | 8.98  | 0.01 | 7.9E-01 |
| ACO1          | 10.66 | 0.02 | 8.3E-01 | UBFD1       | 9.22  | 0.01 | 7.8E-01 |
| ANXA6         | 12.20 | 0.01 | 8.3E-01 | KATNAL2     | 10.27 | 0.01 | 8.0E-01 |
| OTUB1         | 10.79 | 0.01 | 8.3E-01 | RPS9        | 11.05 | 0.01 | 8.2E-01 |
| MAPK14        | 10.06 | 0.01 | 8.6E-01 | CDK14;CDK16 | 7.62  | 0.01 | 8.3E-01 |
| LMOD2         | 9.89  | 0.01 | 8.6E-01 | NUDT4       | 10.29 | 0.01 | 8.0E-01 |
| POLR2C        | 8.63  | 0.01 | 8.4E-01 | NUBP1       | 9.58  | 0.01 | 6.8E-01 |
| PTMS          | 9.28  | 0.01 | 7.8E-01 | IFIT5       | 9.07  | 0.01 | 7.9E-01 |

**Supplemental Table 6: Correlation of the SILAC data with the RNA sequencing data of iPSC-derived atrial and ventricular cardiomyocytes (aCMs and vCMs) and with the published proteomic data sets obtained from human fetal and adult atrial (A) and ventricular (V) tissues.** SILAC: n = 4 vCM and n = 4 aCM independent differentiation experiments at day 68 from iPSC line isWT1.Bld2; RNA sequencing: n = 4 iPSC-vCM and n = 4 iPSC-aCM independent differentiation experiments at day 90 from 3 iPSC lines. Proteomics: 17-23-week-old fetal heart tissues (3), 21-47-year-old adult healthy heart tissues (4).

(A) List of candidates that are significantly lower expressed in iPSC-aCMs in both proteomic data (178 differential proteins vs. iPSC-vCMs) and RNA sequencing data (1.560 differential genes vs. iPSC-vCMs; log<sub>2</sub> fold < -0.5; P < 0.05), in published proteomic data of human fetal atria (81 differential proteins vs. fetal ventricles) (3), or in human adult atrial tissues (409 differential proteins vs. ventricular tissues) (4), of which 67 candidates show the overlap between proteomic and transcriptomic data of iPSC-CMs, whereas 14 and 19 proteins revealed an overlap between proteomic data of iPSC-CMs and published proteomic data from human fetal and adult heart tissues, respectively.

| Gene name       | Proteomics<br>log <sub>2</sub><br>(aCMs/<br>vCMs) | RNAseq<br>log <sub>2</sub><br>(aCMs/<br>vCMs) | Lu <i>et al.</i><br>log <sub>2</sub><br>(A/V) | Doll <i>et al.</i><br>log <sub>2</sub><br>(A/V) | Gene name         | Proteomics<br>log <sub>2</sub><br>(aCMs/<br>vCMs) | RNAseq<br>log <sub>2</sub><br>(aCMs/<br>vCMs) | Lu <i>et al.</i><br>log <sub>2</sub><br>(A/V) | Doll <i>et al.</i><br>log <sub>2</sub><br>(A/V) |
|-----------------|---------------------------------------------------|-----------------------------------------------|-----------------------------------------------|-------------------------------------------------|-------------------|---------------------------------------------------|-----------------------------------------------|-----------------------------------------------|-------------------------------------------------|
| KCTD12          | -3.58                                             | -0.97                                         |                                               | * 0.72                                          | COL5A1            | -1.55                                             | -1.90                                         |                                               | * 1.99                                          |
| MYL3            | -3.50                                             | n.s.                                          | -4.94                                         | -4.56                                           | IKBIP             | -1.51                                             | -0.69                                         |                                               |                                                 |
| S100A4          | -3.36                                             | -1.12                                         |                                               | * 1.15                                          | CGNL1             | -1.50                                             | -2.54                                         |                                               |                                                 |
| MYL2            | -3.22                                             | -3.20                                         | -11.05                                        | -1.79                                           | ANKRD50           | -1.49                                             | -1.58                                         |                                               |                                                 |
| COL12A1         | -3.22                                             | -5.19                                         |                                               | * 1.77                                          | GUCY1A3           | -1.47                                             | -2.39                                         |                                               |                                                 |
| MYL5            | -3.01                                             | * 1.18                                        | -30.04                                        | -2.23                                           | KIF21A            | -1.43                                             | -1.05                                         |                                               |                                                 |
| AIF1L           | -3.00                                             | -2.04                                         |                                               |                                                 | ABRACL            | -1.42                                             | -1.46                                         |                                               |                                                 |
| NNMT            | -2.72                                             | -1.79                                         |                                               | * 2.54                                          | LTBP1             | -1.41                                             | -1.40                                         |                                               | * 2.85                                          |
| MDK             | -2.68                                             | -1.87                                         |                                               |                                                 | RCS1              | -1.37                                             | -1.42                                         |                                               |                                                 |
| RAB8B           | -2.50                                             | -1.31                                         |                                               | * 0.95                                          | LAMA4             | -1.35                                             | -2.17                                         |                                               |                                                 |
| CLDN6           | -2.41                                             | -1.34                                         |                                               |                                                 | PLCXD3            | -1.30                                             | -3.27                                         |                                               | -0.98                                           |
| COL15A1         | -2.30                                             | -2.75                                         | -1.31                                         |                                                 | FGF1              | -1.29                                             | -1.80                                         |                                               |                                                 |
| MST4            | -2.29                                             | -1.66                                         |                                               |                                                 | SORBS2            | -1.27                                             | -1.30                                         | -1.26                                         | -1.12                                           |
| NAV1            | -2.23                                             | -4.03                                         | -1.13                                         | -2.30                                           | XIRP1             | -1.24                                             | -1.17                                         | -1.11                                         |                                                 |
| SLC1A3          | -2.20                                             | n.s.                                          |                                               | -1.26                                           | RAI14             | -1.22                                             | -2.22                                         |                                               |                                                 |
| ARPC1B          | -2.15                                             | -1.15                                         |                                               |                                                 | TLN2              | -1.19                                             | -1.41                                         |                                               |                                                 |
| MYLK3           | -2.07                                             | -2.09                                         |                                               |                                                 | ANXA2;<br>ANXA2P2 | -1.18                                             | -0.74                                         |                                               | * 0.54                                          |
| PYGL            | -2.06                                             | -1.79                                         | -1.63                                         | * 1.47                                          | TNS1              | -1.17                                             | -2.55                                         | -2.26                                         |                                                 |
| PHLDB2          | -1.97                                             | -3.18                                         | -22.67                                        | -2.83                                           | PRKAG1            | -1.15                                             | n.s.                                          |                                               | -1.27                                           |
| FGF12;<br>FGF14 | -1.95                                             | -2.54;<br>-3.38                               |                                               | * 0.93;<br>-                                    | UBE2E2;<br>UBE2E1 | -1.15                                             | -1.03;<br>-0.84                               |                                               |                                                 |
| HSPB3           | -1.87                                             | -0.93                                         |                                               | * 0.68                                          | METAP1            | -1.15                                             | -1.25                                         |                                               |                                                 |
| FBN2            | -1.87                                             | -2.18                                         |                                               |                                                 | ANXA3             | -1.15                                             | -0.91                                         |                                               | -0.67                                           |
| NRAP            | -1.84                                             | -3.25                                         |                                               |                                                 | GUCY1B3           | -1.14                                             | -1.72                                         |                                               |                                                 |
| CDH3            | -1.83                                             | -3.31                                         |                                               |                                                 | SDCBP             | -1.10                                             | -1.02                                         |                                               |                                                 |
| COL6A6          | -1.81                                             | -2.47                                         |                                               | * 2.24                                          | RPS6KA3           | -1.07                                             | -1.70                                         |                                               |                                                 |
| EPB41L2         | -1.78                                             | n.s.                                          |                                               | -2.20                                           | GPD1L             | -1.06                                             | -1.37                                         | -1.36                                         |                                                 |
| PDE1C           | -1.73                                             | -1.68                                         |                                               | -1.42                                           | HSPB6             | -1.05                                             | -1.37                                         |                                               | -1.10                                           |
| PSMB9           | -1.72                                             | -2.86                                         |                                               |                                                 | WARS              | -1.05                                             | n.s.                                          |                                               | -0.73                                           |
| CSRP1           | -1.71                                             | -1.51                                         |                                               | * 1.18                                          | PPFIBP1           | -1.01                                             | -1.66                                         |                                               | -0.85                                           |
| SERPINE2        | -1.70                                             | -1.90                                         |                                               |                                                 | CAST              | -1.01                                             | -0.50                                         |                                               |                                                 |
| FAM84B          | -1.68                                             | -2.34                                         |                                               |                                                 | PDLIM1            | -1.01                                             | -1.11                                         | -1.13                                         | -0.97                                           |
| CAB39L          | -1.68                                             | -1.48                                         |                                               | * 2.06                                          | SEPT9             | -0.94                                             | -0.86                                         |                                               |                                                 |
| PRKCA           | -1.65                                             | -0.97                                         |                                               |                                                 | MAP4              | -0.90                                             | -0.82                                         |                                               |                                                 |
| AHNAK           | -1.64                                             | -1.86                                         |                                               |                                                 | FHL1              | -0.88                                             | -1.80                                         |                                               |                                                 |
| SNX18           | -1.61                                             | -1.94                                         |                                               |                                                 | ADH5              | -0.88                                             | -1.22                                         |                                               | -0.65                                           |
| MAOB            | -1.56                                             | -2.89                                         | -3.12                                         | -0.48                                           | SORBS2            | -0.84                                             | -1.30                                         | -1.26                                         | -1.12                                           |
| HEPH            | -1.56                                             | -1.17                                         |                                               |                                                 |                   |                                                   |                                               |                                               |                                                 |

\*reverse expression, n.s. not significant



**(B)** List of candidates that are significantly higher expressed in iPSC-aCMs in both proteomic data (94 differential proteins vs. iPSC-vCMs) and RNA sequencing data (1,629 differential genes vs. iPSC-vCMs; log<sub>2</sub> fold > 0.5; P < 0.05), in published proteomic data of human fetal atrium (134 differential proteins vs. fetal ventricle) (3), or in human adult atrial tissues (1,220 differential proteins vs. ventricular tissues) (4), of which 24 candidates show the overlap between proteomic and transcriptomic data of iPSC-CMs, whereas 7 and 17 proteins revealed an overlap between proteomic data of iPSC-CMs and published proteomic data from human fetal and adult heart tissues, respectively.

|                 | Proteomics                          | RNAseq                              | Lu <i>et al.</i>          | Doll <i>et al.</i>        |                                  | Proteomics                          | RNAseq                              | Lu <i>et al.</i>          | Doll <i>et al.</i>        |
|-----------------|-------------------------------------|-------------------------------------|---------------------------|---------------------------|----------------------------------|-------------------------------------|-------------------------------------|---------------------------|---------------------------|
| Gene name       | log <sub>2</sub><br>(aCMs/<br>vCMs) | log <sub>2</sub><br>(aCMs/<br>vCMs) | log <sub>2</sub><br>(A/V) | log <sub>2</sub><br>(A/V) | Gene name                        | log <sub>2</sub><br>(aCMs/<br>vCMs) | log <sub>2</sub><br>(aCMs/<br>vCMs) | log <sub>2</sub><br>(A/V) | log <sub>2</sub><br>(A/V) |
| PADI2           | 4.82                                | 2.40                                |                           |                           | MYH11                            | 2.66                                | n.s.                                |                           | 1.28                      |
| MYH4            | 4.81                                | n.s.                                |                           | 3.67                      | PAM                              | 2.62                                | n.s.                                | 7.57                      | 3.86                      |
| GNAO1           | 4.02                                | 1.77                                |                           | 2.14                      | TMEM141                          | 2.61                                | 0.98                                |                           |                           |
| NR2F2;<br>NR2F1 | 3.84                                | 1.83;<br>2.71                       |                           | 1.04                      | RAB27A                           | 2.42                                | 1.25                                |                           |                           |
| MYH6            | 3.82                                | 2.01                                | 7.77                      | 3.57                      | SH3KBP1                          | 2.37                                | 1.39                                |                           |                           |
| NPPA            | 3.78                                | n.s.                                | 5.34                      | 8.08                      | DHRS7B                           | 2.35                                | n.s.                                |                           | 0.73                      |
| METTL7B         | 3.74                                | 2.76                                |                           | 3.90                      | DNAJB11                          | 2.30                                | n.s.                                |                           | 0.95                      |
| MGARP           | 3.67                                | 2.73                                |                           | 3.42                      | C10orf35                         | 2.17                                | 0.70                                |                           |                           |
| VSNL1           | 3.58                                | 1.20                                |                           | 2.30                      | PNKD                             | 2.11                                | 0.83                                |                           |                           |
| ADCY5           | 3.19                                | 0.77                                |                           |                           | ATP6V1G2;<br>ATP6V1G2-<br>DDX39B | 2.10                                | 0.85                                |                           | 1.16                      |
| MYL7            | 3.16                                | -                                   | 2.74                      | 6.10                      | PLCB1                            | 2.07                                | n.s.                                | 23.65                     | 2.63                      |
| ATP1B2          | 3.13                                | 1.00                                |                           |                           | TIMM10B                          | 1.92                                | n.s.                                |                           | 1.67                      |
| SOD3            | 2.96                                | 1.81                                |                           | 1.99                      | D2HGDH                           | 1.81                                | 0.77                                |                           |                           |
| NME4            | 2.81                                | 0.51                                |                           |                           | A2M                              | 1.81                                | 0.93                                |                           |                           |
| ATP2A2          | 2.78                                | 1.12                                | 1.66                      |                           | CAV1                             | 1.79                                | 0.93                                |                           |                           |
| MYOM2           | 2.67                                | 1.27                                |                           |                           | ACSF2                            | 1.77                                | 1.15                                | 1.64                      |                           |

n.s. not significant

**Supplemental Table 7:** Antibodies and dilutions used for immunofluorescence (IF), flow cytometry (FC) and western blot (WB) analyses.

| <b>Primary antibody</b>                                 | <b>Dilution</b>          | <b>Supplier</b>                           |
|---------------------------------------------------------|--------------------------|-------------------------------------------|
| $\alpha$ -actinin, monoclonal mouse IgG1                | IF 1:1,000<br>FC 1:4,000 | Sigma-Aldrich, clone EA-53                |
| CX43, polyclonal rabbit IgG                             | IF 1:1,000               | Abcam, catalog ab11370                    |
| cTNT, monoclonal mouse IgG1                             | FC 1:200<br>WB 1:10,000  | Thermo Fisher Scientific, clone 13-11     |
| GAPDH, monoclonal mouse IgG1                            | WB 1:5,000               | Merck Millipore, clone 6C5                |
| LIN28, polyclonal goat IgG                              | IF 1:300                 | R&D Systems, catalog AF3757               |
| MLC2A, monoclonal mouse IgG2a                           | IF 1:200<br>WB 1:2,000   | Synaptic Systems, clone 56F5              |
| MLC2V, polyclonal rabbit IgG                            | IF 1:200<br>WB 1:2,000   | Proteintech, catalog 10906-1-AP           |
| NANOG, polyclonal rabbit IgG                            | IF 1:100                 | Thermo Fisher Scientific, catalog PA1-097 |
| OCT3/4, polyclonal goat IgG                             | IF 1:40                  | R&D Systems, catalog AF1759               |
| Phalloidin conjugate Alexa Fluor 555                    | IF 1: 200                | Thermo Fisher Scientific, catalog A34055  |
| Phalloidin conjugate Alexa Fluor 633                    | IF 1: 200                | Thermo Fisher Scientific, catalog A22284  |
| RYR2, polyclonal rabbit IgG                             | IF 1:500                 | Sigma-Aldrich, catalog HPA020028          |
| SOX2, monoclonal mouse IgG1                             | IF 1:200                 | Thermo Fisher Scientific, clone 20G5      |
| SSEA4, monoclonal mouse IgG3                            | IF 1:100                 | Thermo Fisher Scientific, clone MC-813-70 |
| TRA-1-60, monoclonal mouse IgM                          | IF 1:200                 | Abcam, clone TRA-1-60                     |
| <b>Secondary antibody</b>                               | <b>Dilution</b>          | <b>Supplier</b>                           |
| Alexa Fluor 488, polyclonal donkey $\alpha$ -mouse IgG  | IF 1:1,000<br>FC 1:1,000 | Thermo Fisher Scientific, catalog A21202  |
| Alexa Fluor 555, polyclonal donkey $\alpha$ -goat IgG   | IF 1:1,000               | Thermo Fisher Scientific, catalog A21432  |
| Alexa Fluor 555, polyclonal donkey $\alpha$ -mouse IgG  | IF 1:1,000               | Thermo Fisher Scientific, catalog A31570  |
| Alexa Fluor 555, polyclonal donkey $\alpha$ -rabbit IgG | IF 1:1,000               | Thermo Fisher Scientific, catalog A31572  |
| FITC, polyclonal goat $\alpha$ -mouse IgM               | FC 1:200                 | Jackson Immuno, catalog 115-097-020       |
| HRP, polyclonal donkey anti-mouse IgG                   | WB 1:10,000              | Thermo Fisher Scientific, catalog A16017  |
| HRP, polyclonal donkey anti-rabbit IgG                  | WB 1:10,000              | Thermo Fisher Scientific, catalog A16035  |

**Supplemental Table 8:** Primer sequences, annealing temperatures and cycles used for RT-PCR and real time-PCR analyses.

| Gene                | Primer for / rev                                               | Length  | Temp / cycles |
|---------------------|----------------------------------------------------------------|---------|---------------|
| FOXD3               | GTGAAGCCGCTTACTCGTAC / CGAAGCTCTGCATCATGAG                     | 353 bps | 58°C / 38     |
| GAPDH               | AGAGGCAGGGATGATGTTCT / TCTGCTGATGCCCCCATGTT                    | 258 bps | 60°C / 30     |
| GDF3                | TTCGCTTTCTCCCAGACCAAGTTTC /<br>TACATCCAGCAGGTTGAAGTGAACAGCACC  | 311 bps | 58°C / 32     |
| GJA1                | GGGTAAAGGGAAAGAGCGACC / CCCCATTCGATTTTGTCTGC                   | 248 bps | 60°C / 30     |
| GJA5                | CCACAGAGAAGAATGTCTTCA / TGCTGCTGGCCTTACTAAGA                   | 447 bps | 56°C / 30     |
| HEY2                | ATGAGCATAGGATTCCGAGAGTG / GGCAGGAGGCACTTCTGAAG                 | 300 bps | 58°C / 30     |
| HOXA1               | GGGAAAGTTGGAGAGTACGGC / CCTCAGTGGGAGGTAGTCAG                   | 359 bps | 58°C / 30     |
| IRX4                | TTCCGTTCTGAAGCGTGGTC / TGAAGCAGGCAATTATTGGTGT                  | 188 bps | 56°C / 30     |
| LEF1                | CCAGCTATTGTAACACCTCA / TTCAGATGTAGGCAGCTGTC                    | 421 bps | 56°C / 30     |
| LIN28               | AGTAAGCTGCACATGGAAGG / ATTGTGGCTCAATTCTGTGC                    | 410 bps | 58°C / 36     |
| MYL2                | GGCGAGTGAACGTGAAAAAT /<br>CAGCATTTCCTCGAACGTAAT                | 200 bps | 56°C / 30     |
| MYL7                | GAAGGTGAGTGTCCCAGAGG / CTTGTAGTCGATGTTCCCCG                    | 289 bps | 58°C / 22     |
| NANOG               | AGTCCCAAAGGCAAACAACCCACTTC /<br>ATCTGCTGGAGGCTGAGGTATTTCTGTCTC | 164 bps | 64°C / 36     |
| NKX2-5              | GGCCTCAATCCCTACGGTTA / CACGAGAGTCAGGGAGCTGT                    | 308 bps | 58°C / 30     |
| NKX2-5<br>real time | ACCTCAACAGCTCCCTGACTCT / TAATCGCCGCCACAACTCTCC                 | 155 bps |               |
| NPPA                | ACAGACGTAGGCCAAGAGAG / GTCTGACCTAGGAGCTGGAA                    | 158 bps | 60°C / 26     |
| NR2F2               | CCGACCGGGTGGTCGCCTTTATGGA /<br>CGGCTGGTTGGGGTACTGGCTCCTA       | 227 bps | 60°C / 30     |
| RARB                | AGAGTTTGATGGAGTTGGGTGGAC /<br>GGAAGACGGACTCGCAGTGTAG           | 168 bps | 58°C / 30     |
| SOX2                | ATGCACCGCTACGACGTGA / CTTTTGCACCCCTCCATTT                      | 437 bps | 60°C / 30     |
| TNNT2               | GACAGAGCGGAAAAGTGGGA / TGAAGGAGGCCAGGCTCTAT                    | 305 bps | 56°C / 26     |
| WNT3A               | GCCCCACTCGGATACTTCT / GGCATGATCTCCACGTAGT                      | 188 bps | 58°C / 30     |
| WNT8A               | ACAGGTCCCAAGGCCTATCT / ATCCTTTCCCAAATTCCAC                     | 335 bps | 58°C / 30     |

## References

1. Devalla HD, et al. Atrial-like cardiomyocytes from human pluripotent stem cells are a robust preclinical model for assessing atrial-selective pharmacology. *EMBO Mol Med.* 2015;7(4):394-410.
2. Asp J, Synnergren J, Jonsson M, Dellgren G, Jeppsson A. Comparison of human cardiac gene expression profiles in paired samples of right atrium and left ventricle collected in vivo. *Physiol Genomics.* 2012;44(1):89-98.
3. Lu ZQ, Sinha A, Sharma P, Kislinger T, Gramolini AO. Proteomic analysis of human fetal atria and ventricle. *J Proteome Res.* 2014;13(12):5869-5878.
4. Doll S, et al. Region and cell-type resolved quantitative proteomic map of the human heart. *Nat Commun.* 2017;8(1):1469.
